# Supplementary material for: Brain network dynamics determine tau presence while regional vulnerability governs tau load in Alzheimer’s disease
Source: bioRxiv preprint, doi:10.1101/2025.04.17.648358, version 4 (2026-01-28)
Supplement: Supplementary Table 4 [file 648358_file03.xlsx]

## Sheet: Tau presence
	Connectivity	Factor type	Factor	Rate	R	MSE	EV	Time	Hyperparam	Best rate	Baseline model	Null model (95%CI)	> Null 95%CI
1	structural connectivity	AD-realted	MAPT	syn	0.877564	0.00353138	0.770102	138	(0.9, 3, 0.9)	1	0	0.695194	higher
2	structural connectivity	AD-realted	MAPT	mis	0.874788	0.00445986	0.747153	3109	(0.5, 1.5, 0.7)	0	0	0.695194	higher
3	structural connectivity	metabolism	cbf	clear	0.870315	0.00542223	0.73509	2302	(0.01, 0.9, 0.5)	1	0	0.695194	higher
4	structural connectivity	AD-realted	Abeta	spread	0.86571	0.00469159	0.730136	4038	(0.01, 0.5, 1)	1	0	0.695194	higher
5	structural connectivity	AD-realted	MAPT	spread	0.847432	0.00422811	0.623144	9886	(0.01, 0.9, 1)	0	0	0.695194	higher
6	structural connectivity	Receptors	5HT1b	clear	0.844644	0.0054225	0.71049	63	(0.9, 3, 1)	1	0	0.695194	higher
7	structural connectivity	Receptors	5HTT	syn	0.840799	0.00583594	0.646712	21949	(0.01, 0.9, 0.1)	1	0	0.695194	higher
8	structural connectivity	Receptors	GABAa	clear	0.838458	0.00674334	0.698975	65	(0.9, 3, 1)	1	0	0.695194	higher
9	structural connectivity	Receptors	5HT4	mis	0.837402	0.00578968	0.557519	22369	(0.01, 1.5, 0.3)	1	0	0.695194	higher
10	structural connectivity	metabolism	cmrglc	clear	0.836096	0.00696403	0.651199	12955	(0.01, 1, 0.1)	1	0	0.695194	higher
11	structural connectivity	Cortical expansion	scalinghcp	spread	0.833681	0.00760801	0.632081	23817	(0.01, 1.5, 0.1)	1	0	0.695194	higher
12	structural connectivity	Cortical expansion	devexp	spread	0.829033	0.00629206	0.651953	819	(0.9, 1.5, 0.1)	1	0	0.695194	higher
13	structural connectivity	AD-realted	APOE	clear	0.828967	0.00711548	0.61796	12544	(0.01, 1, 0.1)	1	0	0.695194	higher
14	structural connectivity	Cortical expansion	evoexp	syn	0.82862	0.00745875	0.623034	4010	(0.01, 3, 0.1)	1	0	0.695194	higher
15	structural connectivity	Celltype	Endo	syn	0.828455	0.00731316	0.611579	15604	(0.01, 1.5, 0.1)	1	0	0.695194	higher
16	structural connectivity	AD-realted	Abeta	mis	0.828217	0.00822639	0.597917	13350	(0.01, 3, 0.1)	0	0	0.695194	higher
17	structural connectivity	Cortical expansion	scaling	spread	0.826938	0.00754388	0.611137	15976	(0.01, 1.9, 0.1)	1	0	0.695194	higher
18	structural connectivity	Receptors	5HT4	syn	0.826738	0.00839459	0.579351	2856	(0.3, 2, 0.1)	0	0	0.695194	higher
19	structural connectivity	Microstructure	thickness	spread	0.825755	0.00743156	0.649513	405	(0.9, 2, 0.1)	1	0	0.695194	higher
20	structural connectivity	Receptors	NET	clear	0.825718	0.00785199	0.629477	7985	(0.1, 1, 0.1)	1	0	0.695194	higher
21	structural connectivity	metabolism	cmr02	clear	0.825422	0.00868214	0.60388	12340	(0.01, 1, 0.1)	1	0	0.695194	higher
22	structural connectivity	Receptors	5HT1a	spread	0.824568	0.00728027	0.644355	438	(0.9, 1.9, 0.1)	1	0	0.695194	higher
23	structural connectivity	Celltype	Neuro-Ex	syn	0.821738	0.00693025	0.583846	3256	(0.1, 2.9, 0.1)	1	0	0.695194	higher
24	structural connectivity	Receptors	D2	spread	0.821346	0.00730102	0.637341	401	(0.9, 2, 0.1)	1	0	0.695194	higher
25	structural connectivity	Cortical expansion	scalinghcp	syn	0.820965	0.00919323	0.55306	3573	(0.3, 2, 0.1)	0	0	0.695194	higher
26	structural connectivity	Receptors	5HT1a	mis	0.820536	0.00672955	0.569792	29999	(0.01, 1, 1)	0	0	0.695194	higher
27	structural connectivity	Cortical expansion	scalinghcp	mis	0.819101	0.00938442	0.518199	9998	(0.01, 3, 0.1)	0	0	0.695194	higher
28	structural connectivity	Celltype	Astro	spread	0.8187	0.0075901	0.625784	280	(0.9, 2.5, 0.1)	1	0	0.695194	higher
29	structural connectivity	Cortical expansion	scalingnih	syn	0.818683	0.00948225	0.462019	6685	(0.05, 2.5, 0.1)	1	0	0.695194	higher
30	structural connectivity	Receptors	5HT4	spread	0.818383	0.00728493	0.62984	456	(0.9, 1.9, 0.1)	0	0	0.695194	higher
31	structural connectivity	Receptors	D2	mis	0.818167	0.00612702	0.561992	29999	(0.01, 1, 0.9)	0	0	0.695194	higher
32	structural connectivity	Cortical expansion	evoexp	mis	0.817779	0.00809184	0.554633	7517	(0.3, 3, 0.1)	0	0	0.695194	higher
33	structural connectivity	Cortical expansion	scaling	mis	0.817047	0.00933147	0.516036	11534	(0.01, 2.9, 0.1)	0	0	0.695194	higher
34	structural connectivity	Receptors	5HT2a	mis	0.816821	0.00803704	0.561798	7588	(0.3, 3, 0.1)	1	0	0.695194	higher
35	structural connectivity	Receptors	MOR	spread	0.816545	0.00714966	0.630046	463	(0.9, 1.9, 0.1)	1	0	0.695194	higher
36	structural connectivity	Receptors	5HT1a	syn	0.816068	0.00798682	0.631985	119	(0.9, 3, 0.1)	0	0	0.695194	higher
37	structural connectivity	Celltype	Micro	spread	0.815269	0.0073424	0.616873	409	(0.9, 2, 0.1)	1	0	0.695194	higher
38	structural connectivity	Cortical expansion	devexp	mis	0.814544	0.00908817	0.535497	11831	(0.01, 3, 0.1)	0	0	0.695194	higher
39	structural connectivity	Receptors	5HT6	clear	0.814233	0.00900209	0.59873	8332	(0.01, 1, 0.1)	1	0	0.695194	higher
40	structural connectivity				0.813268	0.00798645	0.611356	416	(0.9, 1.9, 0.1)	0	1	0.695194	higher
41	structural connectivity	AD-realted	Cluster1	syn	0.813268	0.00798645	0.611356	416	(0.9, 1.9, 0.1)	1	0	0.695194	higher
42	structural connectivity	AD-realted	Cluster4	syn	0.813268	0.00798645	0.611356	416	(0.9, 1.9, 0.1)	1	0	0.695194	higher
43	structural connectivity	AD-realted	Cluster7	mis	0.813268	0.00798645	0.611356	416	(0.9, 1.9, 0.1)	1	0	0.695194	higher
44	structural connectivity	AD-realted	Cluster5	clear	0.813268	0.00798645	0.611356	416	(0.9, 1.9, 0.1)	1	0	0.695194	higher
45	structural connectivity	AD-realted	Cluster4	clear	0.813268	0.00798645	0.611356	416	(0.9, 1.9, 0.1)	0	0	0.695194	higher
46	structural connectivity	AD-realted	Cluster1	spread	0.813268	0.00798645	0.611356	416	(0.9, 1.9, 0.1)	0	0	0.695194	higher
47	structural connectivity	AD-realted	Cluster4	spread	0.813268	0.00798645	0.611356	416	(0.9, 1.9, 0.1)	0	0	0.695194	higher
48	structural connectivity	AD-realted	Cluster4	mis	0.813268	0.00798645	0.611356	416	(0.9, 1.9, 0.1)	0	0	0.695194	higher
49	structural connectivity	AD-realted	Cluster2	syn	0.813268	0.00798645	0.611356	416	(0.9, 1.9, 0.1)	1	0	0.695194	higher
50	structural connectivity	AD-realted	Cluster1	mis	0.813268	0.00798645	0.611356	416	(0.9, 1.9, 0.1)	0	0	0.695194	higher
51	structural connectivity	AD-realted	Cluster2	clear	0.813268	0.00798645	0.611356	416	(0.9, 1.9, 0.1)	0	0	0.695194	higher
52	structural connectivity	AD-realted	Cluster2	spread	0.813268	0.00798645	0.611356	416	(0.9, 1.9, 0.1)	0	0	0.695194	higher
53	structural connectivity	AD-realted	Cluster1	clear	0.813268	0.00798645	0.611356	416	(0.9, 1.9, 0.1)	0	0	0.695194	higher
54	structural connectivity	AD-realted	Cluster6	syn	0.813268	0.00798645	0.611356	416	(0.9, 1.9, 0.1)	1	0	0.695194	higher
55	structural connectivity	AD-realted	Cluster7	spread	0.813268	0.00798645	0.611356	416	(0.9, 1.9, 0.1)	0	0	0.695194	higher
56	structural connectivity	AD-realted	Cluster7	syn	0.813268	0.00798645	0.611356	416	(0.9, 1.9, 0.1)	0	0	0.695194	higher
57	structural connectivity	AD-realted	Cluster6	clear	0.813268	0.00798645	0.611356	416	(0.9, 1.9, 0.1)	0	0	0.695194	higher
58	structural connectivity	AD-realted	Cluster6	mis	0.813268	0.00798645	0.611356	416	(0.9, 1.9, 0.1)	0	0	0.695194	higher
59	structural connectivity	AD-realted	Cluster6	spread	0.813268	0.00798645	0.611356	416	(0.9, 1.9, 0.1)	0	0	0.695194	higher
60	structural connectivity	AD-realted	Cluster3	spread	0.813268	0.00798645	0.611356	416	(0.9, 1.9, 0.1)	0	0	0.695194	higher
61	structural connectivity	AD-realted	Cluster3	mis	0.813268	0.00798645	0.611356	416	(0.9, 1.9, 0.1)	0	0	0.695194	higher
62	structural connectivity	AD-realted	Cluster5	spread	0.813268	0.00798645	0.611356	416	(0.9, 1.9, 0.1)	0	0	0.695194	higher
63	structural connectivity	AD-realted	Cluster5	syn	0.813268	0.00798645	0.611356	416	(0.9, 1.9, 0.1)	0	0	0.695194	higher
64	structural connectivity	AD-realted	Cluster2	mis	0.813268	0.00798645	0.611356	416	(0.9, 1.9, 0.1)	0	0	0.695194	higher
65	structural connectivity	AD-realted	Cluster3	syn	0.813268	0.00798645	0.611356	416	(0.9, 1.9, 0.1)	1	0	0.695194	higher
66	structural connectivity	AD-realted	Cluster3	clear	0.813268	0.00798645	0.611356	416	(0.9, 1.9, 0.1)	0	0	0.695194	higher
67	structural connectivity	AD-realted	Cluster5	mis	0.813268	0.00798645	0.611356	416	(0.9, 1.9, 0.1)	0	0	0.695194	higher
68	structural connectivity	AD-realted	Cluster7	clear	0.813268	0.00798645	0.611356	416	(0.9, 1.9, 0.1)	0	0	0.695194	higher
69	structural connectivity	Cortical expansion	scalingnih	mis	0.812141	0.00933944	0.483131	16037	(0.01, 2.5, 0.1)	0	0	0.695194	higher
70	structural connectivity	Celltype	Oligo	syn	0.811575	0.00832164	0.603486	17841	(0.01, 1, 0.1)	1	0	0.695194	higher
71	structural connectivity	Cortical expansion	scalingnih	spread	0.81141	0.00794006	0.566592	15818	(0.01, 1.9, 0.1)	0	0	0.695194	higher
72	structural connectivity	Celltype	OPC	spread	0.811085	0.00772927	0.608571	282	(0.9, 2.5, 0.1)	1	0	0.695194	higher
73	structural connectivity	Celltype	OPC	syn	0.810702	0.00785977	0.573743	6302	(0.01, 2.5, 0.1)	0	0	0.695194	higher
74	structural connectivity	Receptors	A4B2	clear	0.810665	0.00889835	0.572472	7548	(0.01, 0.9, 0.1)	1	0	0.695194	higher
75	structural connectivity	Receptors	CB1	spread	0.810063	0.0075725	0.61429	414	(0.9, 2, 0.1)	1	0	0.695194	higher
76	structural connectivity	Celltype	Neuro-Ex	mis	0.80975	0.00799124	0.547112	8727	(0.3, 2.9, 0.1)	0	0	0.695194	higher
77	structural connectivity	Receptors	DAT	syn	0.809285	0.00765733	0.55353	10897	(0.01, 1.5, 0.1)	1	0	0.695194	higher
78	structural connectivity	Cortical expansion	scaling	syn	0.807862	0.0101796	0.415192	3845	(0.05, 2.9, 0.1)	0	0	0.695194	higher
79	structural connectivity	Celltype	Astro	syn	0.80711	0.00777528	0.565265	5793	(0.05, 2.5, 0.1)	0	0	0.695194	higher
80	structural connectivity	Microstructure	thickness	mis	0.806565	0.00882307	0.542763	23968	(0.01, 1.9, 0.1)	0	0	0.695194	higher
81	structural connectivity	Cortical expansion	scalingpnc	mis	0.806461	0.00895384	0.529425	11448	(0.01, 2.9, 0.1)	1	0	0.695194	higher
82	structural connectivity	Receptors	5HT2a	clear	0.806312	0.00978488	0.572724	13849	(0.7, 0.1, 0.1)	0	0	0.695194	higher
83	structural connectivity	Microstructure	genepc1	clear	0.805894	0.00905198	0.536155	23349	(0.01, 0.5, 0.1)	1	0	0.695194	higher
84	structural connectivity	Receptors	DAT	spread	0.804842	0.00813559	0.596243	222	(0.9, 2.9, 0.1)	0	0	0.695194	higher
85	structural connectivity	Receptors	NMDA	clear	0.804193	0.00812492	0.497027	26424	(0.01, 0.5, 0.1)	1	0	0.695194	higher
86	structural connectivity	Cortical expansion	scalingpnc	spread	0.803618	0.00784404	0.545394	18317	(0.01, 1.5, 0.1)	0	0	0.695194	higher
87	structural connectivity	Celltype	Astro	mis	0.803573	0.00830543	0.5616	12853	(0.01, 3, 0.1)	0	0	0.695194	higher
88	structural connectivity	Receptors	H3	clear	0.803494	0.00920559	0.554467	7053	(0.01, 0.9, 0.1)	1	0	0.695194	higher
89	structural connectivity	Microstructure	thickness	syn	0.803343	0.00749441	0.61825	164	(0.9, 2.5, 0.1)	0	0	0.695194	higher
90	structural connectivity	Celltype	Neuro-Ex	spread	0.803317	0.00855834	0.585715	392	(0.9, 2, 0.1)	0	0	0.695194	higher
91	structural connectivity	Celltype	Neuro-In	syn	0.803073	0.00790469	0.548114	8967	(0.01, 2, 0.1)	1	0	0.695194	higher
92	structural connectivity	Receptors	M1	clear	0.803067	0.00975852	0.569857	6946	(0.01, 0.9, 0.1)	1	0	0.695194	higher
93	structural connectivity	Celltype	Oligo	clear	0.801602	0.00751562	0.541614	12146	(0.01, 0.5, 0.3)	0	0	0.695194	higher
94	structural connectivity	Receptors	VAChT	clear	0.800695	0.00931679	0.485564	8572	(0.01, 0.9, 0.1)	1	0	0.695194	higher
95	structural connectivity	Receptors	NMDA	syn	0.800484	0.00802031	0.405089	20996	(0.01, 0.9, 0.3)	0	0	0.695194	higher
96	structural connectivity	Receptors	5HT1b	syn	0.800094	0.00682896	0.49961	20020	(0.01, 0.9, 0.5)	0	0	0.695194	higher
97	structural connectivity	Receptors	D2	syn	0.800083	0.00785878	0.545696	5888	(0.05, 2, 0.1)	0	0	0.695194	higher
98	structural connectivity	Celltype	OPC	mis	0.79988	0.00885792	0.540981	12007	(0.01, 3, 0.1)	0	0	0.695194	higher
99	structural connectivity	Receptors	mGluR5	clear	0.799084	0.00982135	0.527958	10912	(0.01, 0.5, 0.1)	1	0	0.695194	higher
100	structural connectivity	Celltype	Micro	syn	0.798651	0.00792005	0.534134	10813	(0.01, 2, 0.1)	0	0	0.695194	higher
101	structural connectivity	Celltype	Neuro-In	spread	0.798467	0.0088034	0.57593	271	(0.9, 2.5, 0.1)	0	0	0.695194	higher
102	structural connectivity	Receptors	D1	spread	0.798312	0.0083057	0.580476	222	(0.9, 2.9, 0.1)	1	0	0.695194	higher
103	structural connectivity	metabolism	cbv	syn	0.797696	0.00747969	0.481864	14407	(0.01, 0.9, 0.3)	1	0	0.695194	higher
104	structural connectivity	Cortical expansion	evoexp	spread	0.797161	0.00375498	0.615135	580	(0.9, 2, 0.1)	0	0	0.695194	higher
105	structural connectivity	Microstructure	myelinmap	clear	0.796604	0.0102646	0.505335	11634	(0.01, 0.9, 0.1)	1	0	0.695194	higher
106	structural connectivity	Celltype	Endo	clear	0.79639	0.0103186	0.509074	8254	(0.01, 0.9, 0.1)	0	0	0.695194	higher
107	structural connectivity	Receptors	VAChT	syn	0.795415	0.00979996	0.423956	20101	(0.01, 1.5, 0.1)	0	0	0.695194	higher
108	structural connectivity	metabolism	cbv	spread	0.793664	0.00876856	0.565591	210	(0.9, 3, 0.1)	0	0	0.695194	higher
109	structural connectivity	Microstructure	myelinmap	spread	0.793017	0.00867558	0.562396	274	(0.9, 2.5, 0.1)	0	0	0.695194	higher
110	structural connectivity	Celltype	Micro	mis	0.79262	0.00842378	0.503243	29030	(0.01, 1.9, 0.1)	0	0	0.695194	higher
111	structural connectivity	Receptors	M1	syn	0.792301	0.00690494	0.465349	29440	(0.01, 0.9, 0.3)	0	0	0.695194	higher
112	structural connectivity	AD-realted	Abeta	clear	0.791823	0.0102111	0.52202	16717	(0.01, 0.1, 0.1)	0	0	0.695194	higher
113	structural connectivity	Receptors	5HT2a	spread	0.791422	0.00775068	0.522965	21776	(0.5, 1, 0.1)	0	0	0.695194	higher
114	structural connectivity	Cortical expansion	scalingpnc	clear	0.790701	0.0105452	0.497628	23044	(0.01, 0.1, 0.1)	0	0	0.695194	higher
115	structural connectivity	Celltype	Oligo	spread	0.790216	0.00925729	0.548939	443	(0.9, 1.9, 0.1)	0	0	0.695194	higher
116	structural connectivity	Celltype	Neuro-In	mis	0.789792	0.0096271	0.508023	11929	(0.01, 2.9, 0.1)	0	0	0.695194	higher
117	structural connectivity	metabolism	cbf	syn	0.789596	0.00660094	0.456711	16439	(0.01, 0.9, 0.5)	0	0	0.695194	higher
118	structural connectivity	Receptors	5HTT	clear	0.789516	0.0104502	0.496123	10426	(0.01, 0.9, 0.1)	0	0	0.695194	higher
119	structural connectivity	Cortical expansion	devexp	clear	0.789494	0.0101153	0.514664	19637	(0.01, 0.1, 0.1)	0	0	0.695194	higher
120	structural connectivity	Receptors	CB1	mis	0.789359	0.0100806	0.44297	29999	(0.01, 1.5, 0.1)	0	0	0.695194	higher
121	structural connectivity	Receptors	D1	clear	0.788326	0.0101482	0.465764	17698	(0.01, 0.5, 0.1)	0	0	0.695194	higher
122	structural connectivity	Microstructure	genepc1	spread	0.786768	0.00900636	0.549977	213	(0.9, 3, 0.1)	0	0	0.695194	higher
123	structural connectivity	Celltype	Neuro-In	clear	0.786107	0.0099351	0.498138	13522	(0.01, 0.9, 0.1)	0	0	0.695194	higher
124	structural connectivity	Receptors	5HTT	spread	0.785522	0.00846347	0.553865	216	(0.9, 3, 0.1)	0	0	0.695194	higher
125	structural connectivity	metabolism	cbv	clear	0.78505	0.0109057	0.477523	11709	(0.01, 0.9, 0.1)	0	0	0.695194	higher
126	structural connectivity	Receptors	DAT	mis	0.78486	0.0103584	0.483229	20440	(0.01, 1.5, 0.1)	0	0	0.695194	higher
127	structural connectivity	Receptors	MOR	mis	0.784742	0.0106847	0.460699	23716	(0.01, 1.5, 0.1)	0	0	0.695194	higher
128	structural connectivity	metabolism	cmrglc	syn	0.784271	0.00694365	0.441858	29705	(0.01, 0.9, 0.3)	0	0	0.695194	higher
129	structural connectivity	Receptors	M1	mis	0.784223	0.00932963	0.487899	27453	(0.01, 1.5, 0.1)	0	0	0.695194	higher
130	structural connectivity	Cortical expansion	scaling	clear	0.78396	0.011029	0.471944	24757	(0.01, 0.1, 0.1)	0	0	0.695194	higher
131	structural connectivity	Receptors	NET	syn	0.783449	0.00790704	0.427233	19078	(0.01, 0.9, 0.5)	0	0	0.695194	higher
132	structural connectivity	Cortical expansion	evoexp	clear	0.783223	0.0109034	0.495073	20123	(0.01, 0.1, 0.1)	0	0	0.695194	higher
133	structural connectivity	Receptors	D1	mis	0.782789	0.0104458	0.481311	17250	(0.01, 1.5, 0.1)	0	0	0.695194	higher
134	structural connectivity	Celltype	Neuro-Ex	clear	0.782699	0.0104197	0.491136	13429	(0.01, 0.9, 0.1)	0	0	0.695194	higher
135	structural connectivity	Receptors	GABAa	syn	0.782288	0.00759255	0.425013	17287	(0.01, 0.9, 0.5)	0	0	0.695194	higher
136	structural connectivity	Cortical expansion	scalingnih	clear	0.782243	0.0111307	0.465887	29999	(0.01, 0.1, 0.1)	0	0	0.695194	higher
137	structural connectivity	Receptors	5HT2a	syn	0.78119	0.012155	0.477906	762	(0.5, 1.9, 0.1)	0	0	0.695194	higher
138	structural connectivity	Receptors	5HT6	syn	0.780853	0.00713337	0.409422	16756	(0.01, 0.9, 0.5)	0	0	0.695194	higher
139	structural connectivity	Receptors	VAChT	spread	0.780665	0.00853982	0.542969	222	(0.9, 3, 0.1)	0	0	0.695194	higher
140	structural connectivity	Receptors	mGluR5	mis	0.780547	0.0109697	0.48071	29999	(0.01, 1, 0.1)	0	0	0.695194	higher
141	structural connectivity	Celltype	Micro	clear	0.78019	0.0112406	0.489782	13641	(0.01, 0.5, 0.1)	0	0	0.695194	higher
142	structural connectivity	Receptors	H3	syn	0.780024	0.0082719	0.444849	27395	(0.01, 0.9, 0.3)	0	0	0.695194	higher
143	structural connectivity	Receptors	CB1	clear	0.779653	0.0111553	0.478526	20270	(0.01, 0.1, 0.1)	0	0	0.695194	higher
144	structural connectivity	Receptors	MOR	syn	0.779591	0.0104732	0.472745	1233	(0.01, 1.5, 0.5)	0	0	0.695194	higher
145	structural connectivity	Receptors	H3	spread	0.779552	0.00834981	0.542066	224	(0.9, 3, 0.1)	0	0	0.695194	higher
146	structural connectivity	Celltype	Endo	mis	0.779057	0.0104242	0.481696	29999	(0.01, 1, 0.1)	0	0	0.695194	higher
147	structural connectivity	Receptors	5HT6	mis	0.778427	0.0109772	0.480919	27259	(0.01, 0.9, 0.1)	0	0	0.695194	higher
148	structural connectivity	Receptors	A4B2	spread	0.778401	0.00845482	0.537893	223	(0.9, 3, 0.1)	0	0	0.695194	higher
149	structural connectivity	metabolism	cbv	mis	0.778291	0.0110927	0.479661	17694	(0.01, 0.9, 0.1)	0	0	0.695194	higher
150	structural connectivity	Microstructure	myelinmap	mis	0.778101	0.0110863	0.483214	29999	(0.01, 0.5, 0.1)	0	0	0.695194	higher
151	structural connectivity	Celltype	Oligo	mis	0.778097	0.0111134	0.47669	29999	(0.01, 1, 0.1)	0	0	0.695194	higher
152	structural connectivity	metabolism	cmr02	syn	0.777815	0.0076732	0.422217	14380	(0.01, 0.9, 0.5)	0	0	0.695194	higher
153	structural connectivity	Cortical expansion	scalinghcp	clear	0.777809	0.011356	0.459946	29999	(0.01, 0.1, 0.1)	0	0	0.695194	higher
154	structural connectivity	AD-realted	APOE	syn	0.777622	0.00815476	0.438648	14082	(0.01, 0.9, 0.5)	0	0	0.695194	higher
155	structural connectivity	Receptors	A4B2	mis	0.777534	0.0114914	0.480581	29999	(0.01, 0.5, 0.1)	0	0	0.695194	higher
156	structural connectivity	Microstructure	genepc1	mis	0.777491	0.0111225	0.482123	29999	(0.01, 0.5, 0.1)	0	0	0.695194	higher
157	structural connectivity	Receptors	5HTT	mis	0.777472	0.0113621	0.480364	29999	(0.01, 0.5, 0.1)	0	0	0.695194	higher
158	structural connectivity	Receptors	VAChT	mis	0.777415	0.0115764	0.472414	29999	(0.01, 0.5, 0.1)	0	0	0.695194	higher
159	structural connectivity	Receptors	NMDA	mis	0.777383	0.0113787	0.474761	29999	(0.01, 0.5, 0.1)	0	0	0.695194	higher
160	structural connectivity	Receptors	H3	mis	0.777324	0.0115732	0.479626	29999	(0.01, 0.1, 0.1)	0	0	0.695194	higher
161	structural connectivity	Receptors	NET	mis	0.777271	0.0115853	0.479654	29999	(0.01, 0.1, 0.1)	0	0	0.695194	higher
162	structural connectivity	metabolism	cmr02	mis	0.77723	0.0115497	0.479573	29999	(0.01, 0.1, 0.1)	0	0	0.695194	higher
163	structural connectivity	AD-realted	APOE	mis	0.777224	0.0115602	0.479662	29999	(0.01, 0.1, 0.1)	0	0	0.695194	higher
164	structural connectivity	Receptors	GABAa	mis	0.777171	0.0115393	0.47929	29999	(0.01, 0.1, 0.1)	0	0	0.695194	higher
165	structural connectivity	metabolism	cmrglc	mis	0.777166	0.0115615	0.479373	29999	(0.01, 0.1, 0.1)	0	0	0.695194	higher
166	structural connectivity	Receptors	5HT1b	mis	0.777001	0.0115559	0.478778	29999	(0.01, 0.1, 0.1)	0	0	0.695194	higher
167	structural connectivity	metabolism	cbf	mis	0.776976	0.0115626	0.47899	29999	(0.01, 0.1, 0.1)	0	0	0.695194	higher
168	structural connectivity	Celltype	OPC	clear	0.776539	0.0112697	0.475639	13787	(0.01, 0.5, 0.1)	0	0	0.695194	higher
169	structural connectivity	Microstructure	myelinmap	syn	0.776195	0.00876384	0.437526	19459	(0.01, 0.9, 0.3)	0	0	0.695194	higher
170	structural connectivity	Receptors	mGluR5	spread	0.776055	0.00834698	0.530517	222	(0.9, 3, 0.1)	0	0	0.695194	higher
171	structural connectivity	Celltype	Astro	clear	0.775694	0.0113932	0.472253	16074	(0.01, 0.5, 0.1)	0	0	0.695194	higher
172	structural connectivity	Receptors	MOR	clear	0.775452	0.0111961	0.476249	29999	(0.01, 0.1, 0.1)	0	0	0.695194	higher
173	structural connectivity	Celltype	Endo	spread	0.774858	0.00876971	0.527724	218	(0.9, 3, 0.1)	0	0	0.695194	higher
174	structural connectivity	Receptors	5HT4	clear	0.774688	0.0114494	0.473709	24882	(0.01, 0.1, 0.1)	0	0	0.695194	higher
175	structural connectivity	Receptors	NMDA	spread	0.774118	0.00893688	0.52778	214	(0.9, 3, 0.1)	0	0	0.695194	higher
176	structural connectivity	Receptors	DAT	clear	0.772982	0.011243	0.448219	19361	(0.01, 0.5, 0.1)	0	0	0.695194	higher
177	structural connectivity	Cortical expansion	scalingpnc	syn	0.770594	0.0113798	0.340791	3155	(0.01, 1.9, 0.3)	0	0	0.695194	higher
178	structural connectivity	metabolism	cmr02	spread	0.770576	0.00887518	0.511865	216	(0.9, 3, 0.1)	0	0	0.695194	higher
179	structural connectivity	Receptors	D1	syn	0.770321	0.0102651	0.39407	1603	(0.01, 1, 1)	0	0	0.695194	higher
180	structural connectivity	Receptors	NET	spread	0.769436	0.00881371	0.516056	222	(0.9, 3, 0.1)	0	0	0.695194	higher
181	structural connectivity	Microstructure	genepc1	syn	0.768638	0.00895788	0.412478	12607	(0.01, 0.9, 0.5)	0	0	0.695194	higher
182	structural connectivity	AD-realted	APOE	spread	0.768548	0.00888224	0.504799	217	(0.9, 3, 0.1)	0	0	0.695194	higher
183	structural connectivity	Cortical expansion	devexp	syn	0.768027	0.0118237	0.469398	138	(0.9, 1.5, 0.3)	0	0	0.695194	higher
184	structural connectivity	Receptors	D2	clear	0.767576	0.0121008	0.45476	29999	(0.01, 0.1, 0.1)	0	0	0.695194	higher
185	structural connectivity	Receptors	CB1	syn	0.765615	0.0113529	0.33727	1939	(0.01, 1.9, 0.3)	0	0	0.695194	higher
186	structural connectivity	AD-realted	MAPT	clear	0.764704	0.0122554	0.441035	29999	(0.01, 0.1, 0.1)	0	0	0.695194	higher
187	structural connectivity	Microstructure	thickness	clear	0.763984	0.012319	0.437174	29999	(0.01, 0.1, 0.1)	0	0	0.695194	higher
188	structural connectivity	Receptors	5HT6	spread	0.763605	0.00902659	0.502809	217	(0.9, 3, 0.1)	0	0	0.695194	higher
189	structural connectivity	Receptors	5HT1a	clear	0.76281	0.012501	0.440359	29999	(0.01, 0.1, 0.1)	0	0	0.695194	higher
190	structural connectivity	Receptors	A4B2	syn	0.762487	0.0112457	0.41062	29999	(0.01, 0.5, 1)	0	0	0.695194	higher
191	structural connectivity	Receptors	mGluR5	syn	0.76121	0.0115157	0.365826	2633	(0.01, 1, 0.9)	0	0	0.695194	higher
192	structural connectivity	metabolism	cmrglc	spread	0.759095	0.00880746	0.482127	219	(0.9, 3, 0.1)	0	0	0.695194	higher
193	structural connectivity	Receptors	GABAa	spread	0.757841	0.0090048	0.482105	217	(0.9, 3, 0.1)	0	0	0.695194	higher
194	structural connectivity	Receptors	M1	spread	0.753413	0.0106439	0.451926	206	(0.9, 3, 0.1)	0	0	0.695194	higher
195	structural connectivity	metabolism	cbf	spread	0.751332	0.00889852	0.473376	219	(0.9, 3, 0.1)	0	0	0.695194	higher
196	structural connectivity	AD-realted	Abeta	syn	0.749808	0.012872	0.40569	1165	(0.01, 1.5, 0.7)	0	0	0.695194	higher
197	structural connectivity	Receptors	5HT1b	spread	0.721232	0.0108712	0.380769	213	(0.9, 3, 0.1)	0	0	0.695194	higher
1	functional connectivity	Receptors	5HT1b	clear	0.876127	0.00418111	0.766859	48	(0.9, 3, 1)	1	0	0.679322	higher
2	functional connectivity	Receptors	5HT1a	syn	0.87264	0.00304775	0.755328	130	(0.9, 3, 0.3)	1	0	0.679322	higher
3	functional connectivity	Receptors	NET	clear	0.853039	0.00559401	0.685351	177	(0.9, 0.5, 1)	1	0	0.679322	higher
4	functional connectivity	Receptors	5HT1a	mis	0.834003	0.00530433	0.690081	265	(0.9, 3, 0.1)	0	0	0.679322	higher
5	functional connectivity	metabolism	cmrglc	clear	0.83243	0.00521261	0.674727	67	(0.7, 3, 0.7)	1	0	0.679322	higher
6	functional connectivity	AD-realted	APOE	clear	0.828132	0.00630149	0.65298	62	(0.7, 3, 1)	1	0	0.679322	higher
7	functional connectivity	Receptors	5HT1a	spread	0.826258	0.00613809	0.59767	118	(0.1, 1.5, 1)	0	0	0.679322	higher
8	functional connectivity	AD-realted	MAPT	syn	0.822989	0.00465152	0.653523	126	(0.9, 3, 0.1)	1	0	0.679322	higher
9	functional connectivity	Receptors	GABAa	clear	0.822449	0.00682678	0.627169	47	(0.9, 2.5, 1)	1	0	0.679322	higher
10	functional connectivity	metabolism	cbf	clear	0.821283	0.00429945	0.659124	88	(0.7, 3, 0.3)	1	0	0.679322	higher
11	functional connectivity	Receptors	D2	spread	0.820327	0.00653851	0.588504	928	(0.7, 0.9, 0.1)	1	0	0.679322	higher
12	functional connectivity	Receptors	5HT2a	clear	0.814971	0.010614	0.567063	468	(0.9, 0.1, 1)	1	0	0.679322	higher
13	functional connectivity	AD-realted	MAPT	mis	0.814675	0.00533744	0.647151	239	(0.9, 3, 0.1)	0	0	0.679322	higher
14	functional connectivity	Microstructure	thickness	syn	0.80917	0.00617764	0.620989	113	(0.9, 3, 0.1)	1	0	0.679322	higher
15	functional connectivity	AD-realted	MAPT	spread	0.807147	0.00695231	0.548311	170	(0.5, 1, 0.9)	0	0	0.679322	higher
16	functional connectivity	Microstructure	thickness	spread	0.801675	0.00792977	0.528645	168	(0.7, 1, 1)	0	0	0.679322	higher
17	functional connectivity	Receptors	5HT4	spread	0.80088	0.00754507	0.527637	1215	(0.3, 0.9, 0.1)	1	0	0.679322	higher
18	functional connectivity	Receptors	D2	mis	0.796589	0.00686831	0.534511	307	(0.01, 2.9, 0.1)	0	0	0.679322	higher
19	functional connectivity	metabolism	cmr02	clear	0.79423	0.00478876	0.589622	76	(0.7, 3, 0.9)	1	0	0.679322	higher
20	functional connectivity	Receptors	M1	clear	0.792235	0.0111827	0.580237	36	(0.9, 3, 1)	1	0	0.679322	higher
21	functional connectivity	Receptors	D1	spread	0.791982	0.00507666	0.585633	178	(0.9, 3, 0.1)	1	0	0.679322	higher
22	functional connectivity	Receptors	DAT	spread	0.791966	0.00535227	0.577621	174	(0.9, 3, 0.1)	1	0	0.679322	higher
23	functional connectivity	Microstructure	thickness	mis	0.791931	0.00783501	0.521566	80	(0.05, 2.9, 0.5)	0	0	0.679322	higher
24	functional connectivity	Receptors	5HT4	mis	0.790848	0.00674106	0.503325	487	(0.01, 1.9, 0.1)	0	0	0.679322	higher
25	functional connectivity	Receptors	D2	syn	0.789908	0.00580615	0.61643	127	(0.9, 3, 0.1)	0	0	0.679322	higher
26	functional connectivity	Cortical expansion	scaling	spread	0.784904	0.00824433	0.511042	346	(0.1, 1.5, 0.1)	1	0	0.679322	higher
27	functional connectivity	Cortical expansion	evoexp	syn	0.783926	0.00782543	0.412959	234	(0.3, 1.5, 0.1)	1	0	0.679322	higher
28	functional connectivity	Cortical expansion	scalingnih	spread	0.78389	0.00847562	0.510257	257	(0.1, 2, 0.1)	1	0	0.679322	higher
29	functional connectivity	Receptors	CB1	spread	0.782642	0.00866815	0.510742	149	(0.9, 2.9, 0.1)	1	0	0.679322	higher
30	functional connectivity	Receptors	5HT6	spread	0.781916	0.00861272	0.516983	124	(0.9, 2.9, 0.3)	1	0	0.679322	higher
31	functional connectivity	Cortical expansion	scalinghcp	spread	0.781198	0.00836078	0.525579	143	(0.9, 3, 0.1)	1	0	0.679322	higher
32	functional connectivity	Receptors	CB1	syn	0.780946	0.00727115	0.496151	71	(0.7, 1.5, 1)	0	0	0.679322	higher
33	functional connectivity	Microstructure	myelinmap	clear	0.780426	0.00897771	0.489041	44	(0.01, 2, 1)	1	0	0.679322	higher
34	functional connectivity	Receptors	CB1	mis	0.779679	0.00840957	0.436845	50	(0.3, 3, 1)	0	0	0.679322	higher
35	functional connectivity	Cortical expansion	scalinghcp	mis	0.77901	0.0095521	0.430964	207	(0.05, 3, 0.1)	0	0	0.679322	higher
36	functional connectivity	AD-realted	Abeta	mis	0.778914	0.00779468	0.447153	480	(0.01, 2, 0.1)	1	0	0.679322	higher
37	functional connectivity	Receptors	5HTT	spread	0.778738	0.0071575	0.520702	162	(0.9, 3, 0.1)	1	0	0.679322	higher
38	functional connectivity	Cortical expansion	scalinghcp	syn	0.778253	0.00863631	0.500756	263	(0.7, 0.9, 0.1)	0	0	0.679322	higher
39	functional connectivity	AD-realted	Abeta	spread	0.778217	0.00901031	0.4868	333	(0.01, 1.5, 0.1)	0	0	0.679322	higher
40	functional connectivity	Receptors	MOR	spread	0.777805	0.00872731	0.499401	151	(0.9, 2.9, 0.1)	1	0	0.679322	higher
41	functional connectivity	Receptors	A4B2	clear	0.777071	0.00774812	0.531664	40	(0.9, 3, 0.5)	1	0	0.679322	higher
42	functional connectivity	Cortical expansion	scaling	mis	0.776446	0.00953698	0.430561	210	(0.01, 2.9, 0.1)	0	0	0.679322	higher
43	functional connectivity	Receptors	5HT4	syn	0.776233	0.00855329	0.478764	209	(0.7, 0.9, 0.1)	0	0	0.679322	higher
44	functional connectivity	metabolism	cbv	spread	0.775542	0.00826473	0.503766	149	(0.9, 3, 0.1)	1	0	0.679322	higher
45	functional connectivity	Receptors	5HT2a	spread	0.774313	0.00902636	0.49498	142	(0.9, 3, 0.1)	0	0	0.679322	higher
46	functional connectivity	Microstructure	genepc1	clear	0.773834	0.00937111	0.480904	51	(0.01, 1.5, 1)	1	0	0.679322	higher
47	functional connectivity	Cortical expansion	scalingpnc	spread	0.773828	0.00861422	0.477304	397	(0.5, 0.9, 0.1)	1	0	0.679322	higher
48	functional connectivity	Cortical expansion	scalingnih	syn	0.773531	0.00934434	0.466145	62	(0.7, 1.5, 1)	0	0	0.679322	higher
49	functional connectivity	AD-realted	Cluster5	clear	0.772845	0.00837104	0.491245	138	(0.9, 3, 0.1)	0	0	0.679322	higher
50	functional connectivity	AD-realted	Cluster6	spread	0.772845	0.00837104	0.491245	138	(0.9, 3, 0.1)	0	0	0.679322	higher
51	functional connectivity	AD-realted	Cluster6	syn	0.772845	0.00837104	0.491245	138	(0.9, 3, 0.1)	1	0	0.679322	higher
52	functional connectivity	AD-realted	Cluster6	mis	0.772845	0.00837104	0.491245	138	(0.9, 3, 0.1)	0	0	0.679322	higher
53	functional connectivity	AD-realted	Cluster6	clear	0.772845	0.00837104	0.491245	138	(0.9, 3, 0.1)	0	0	0.679322	higher
54	functional connectivity	AD-realted	Cluster7	syn	0.772845	0.00837104	0.491245	138	(0.9, 3, 0.1)	1	0	0.679322	higher
55	functional connectivity	AD-realted	Cluster7	spread	0.772845	0.00837104	0.491245	138	(0.9, 3, 0.1)	0	0	0.679322	higher
56	functional connectivity	AD-realted	Cluster7	mis	0.772845	0.00837104	0.491245	138	(0.9, 3, 0.1)	0	0	0.679322	higher
57	functional connectivity	AD-realted	Cluster5	mis	0.772845	0.00837104	0.491245	138	(0.9, 3, 0.1)	0	0	0.679322	higher
58	functional connectivity	AD-realted	Cluster3	spread	0.772845	0.00837104	0.491245	138	(0.9, 3, 0.1)	0	0	0.679322	higher
59	functional connectivity	AD-realted	Cluster5	spread	0.772845	0.00837104	0.491245	138	(0.9, 3, 0.1)	0	0	0.679322	higher
60	functional connectivity	AD-realted	Cluster5	syn	0.772845	0.00837104	0.491245	138	(0.9, 3, 0.1)	1	0	0.679322	higher
61	functional connectivity	AD-realted	Cluster3	syn	0.772845	0.00837104	0.491245	138	(0.9, 3, 0.1)	1	0	0.679322	higher
62	functional connectivity	AD-realted	Cluster2	clear	0.772845	0.00837104	0.491245	138	(0.9, 3, 0.1)	0	0	0.679322	higher
63	functional connectivity	AD-realted	Cluster2	mis	0.772845	0.00837104	0.491245	138	(0.9, 3, 0.1)	0	0	0.679322	higher
64	functional connectivity	AD-realted	Cluster2	spread	0.772845	0.00837104	0.491245	138	(0.9, 3, 0.1)	0	0	0.679322	higher
65	functional connectivity	AD-realted	Cluster3	clear	0.772845	0.00837104	0.491245	138	(0.9, 3, 0.1)	0	0	0.679322	higher
66	functional connectivity	AD-realted	Cluster2	syn	0.772845	0.00837104	0.491245	138	(0.9, 3, 0.1)	1	0	0.679322	higher
67	functional connectivity	AD-realted	Cluster1	clear	0.772845	0.00837104	0.491245	138	(0.9, 3, 0.1)	0	0	0.679322	higher
68	functional connectivity	AD-realted	Cluster1	mis	0.772845	0.00837104	0.491245	138	(0.9, 3, 0.1)	0	0	0.679322	higher
69	functional connectivity	AD-realted	Cluster1	spread	0.772845	0.00837104	0.491245	138	(0.9, 3, 0.1)	0	0	0.679322	higher
70	functional connectivity	AD-realted	Cluster1	syn	0.772845	0.00837104	0.491245	138	(0.9, 3, 0.1)	1	0	0.679322	higher
71	functional connectivity	AD-realted	Cluster4	syn	0.772845	0.00837104	0.491245	138	(0.9, 3, 0.1)	1	0	0.679322	higher
72	functional connectivity	AD-realted	Cluster4	spread	0.772845	0.00837104	0.491245	138	(0.9, 3, 0.1)	0	0	0.679322	higher
73	functional connectivity	AD-realted	Cluster4	mis	0.772845	0.00837104	0.491245	138	(0.9, 3, 0.1)	0	0	0.679322	higher
74	functional connectivity	AD-realted	Cluster4	clear	0.772845	0.00837104	0.491245	138	(0.9, 3, 0.1)	0	0	0.679322	higher
75	functional connectivity	AD-realted	Cluster3	mis	0.772845	0.00837104	0.491245	138	(0.9, 3, 0.1)	0	0	0.679322	higher
76	functional connectivity				0.772845	0.00837104	0.491245	138	(0.9, 3, 0.1)	0	1	0.679322	higher
77	functional connectivity	AD-realted	Cluster7	clear	0.772845	0.00837104	0.491245	138	(0.9, 3, 0.1)	0	0	0.679322	higher
78	functional connectivity	Celltype	Neuro-In	spread	0.772289	0.00776233	0.51023	151	(0.9, 3, 0.1)	1	0	0.679322	higher
79	functional connectivity	Celltype	Oligo	syn	0.772188	0.00819591	0.413742	216	(0.01, 2, 0.1)	1	0	0.679322	higher
80	functional connectivity	Cortical expansion	scalingnih	mis	0.772132	0.00964665	0.405245	258	(0.01, 2.5, 0.1)	0	0	0.679322	higher
81	functional connectivity	Receptors	MOR	syn	0.771846	0.00828209	0.48875	56	(0.5, 1.9, 0.7)	0	0	0.679322	higher
82	functional connectivity	Celltype	Astro	spread	0.770577	0.00835485	0.493806	149	(0.9, 3, 0.1)	1	0	0.679322	higher
83	functional connectivity	Receptors	5HTT	syn	0.770233	0.00880019	0.440665	158	(0.05, 2, 0.1)	0	0	0.679322	higher
84	functional connectivity	Celltype	Endo	syn	0.770221	0.0080094	0.432185	209	(0.01, 2, 0.1)	1	0	0.679322	higher
85	functional connectivity	Cortical expansion	scaling	syn	0.769679	0.0102205	0.436	106	(0.9, 1, 1)	0	0	0.679322	higher
86	functional connectivity	Celltype	Neuro-Ex	spread	0.768567	0.00795366	0.499806	149	(0.9, 3, 0.1)	1	0	0.679322	higher
87	functional connectivity	Receptors	NMDA	spread	0.76849	0.00870142	0.488892	154	(0.9, 3, 0.1)	1	0	0.679322	higher
88	functional connectivity	Cortical expansion	devexp	spread	0.768058	0.00935192	0.480485	142	(0.9, 3, 0.1)	1	0	0.679322	higher
89	functional connectivity	Receptors	M1	spread	0.767765	0.00931942	0.467434	142	(0.9, 3, 0.1)	0	0	0.679322	higher
90	functional connectivity	Receptors	5HT2a	mis	0.767565	0.00930035	0.418158	240	(0.01, 2.9, 0.1)	0	0	0.679322	higher
91	functional connectivity	Receptors	mGluR5	spread	0.767233	0.00862885	0.482997	149	(0.9, 3, 0.1)	1	0	0.679322	higher
92	functional connectivity	Cortical expansion	scalingpnc	mis	0.766481	0.00931642	0.415312	256	(0.05, 2.5, 0.1)	0	0	0.679322	higher
93	functional connectivity	Receptors	GABAa	spread	0.76591	0.00869582	0.47383	149	(0.9, 3, 0.1)	0	0	0.679322	higher
94	functional connectivity	Cortical expansion	devexp	mis	0.764218	0.0111452	0.459916	146	(0.7, 1.9, 0.1)	0	0	0.679322	higher
95	functional connectivity	Receptors	DAT	syn	0.764147	0.00868065	0.426925	68	(0.05, 2.5, 0.3)	0	0	0.679322	higher
96	functional connectivity	Celltype	Oligo	clear	0.763338	0.00914278	0.435158	230	(0.01, 1, 0.1)	0	0	0.679322	higher
97	functional connectivity	Celltype	OPC	syn	0.763044	0.00868691	0.401705	167	(0.01, 2.5, 0.1)	1	0	0.679322	higher
98	functional connectivity	Receptors	H3	spread	0.762858	0.00874723	0.465591	154	(0.9, 3, 0.1)	1	0	0.679322	higher
99	functional connectivity	Cortical expansion	evoexp	spread	0.761171	0.0093691	0.458752	140	(0.9, 3, 0.1)	0	0	0.679322	higher
100	functional connectivity	Celltype	Astro	syn	0.76077	0.00889794	0.40837	164	(0.01, 2.5, 0.1)	0	0	0.679322	higher
101	functional connectivity	Celltype	Micro	spread	0.760368	0.00898912	0.456851	142	(0.9, 3, 0.1)	1	0	0.679322	higher
102	functional connectivity	Microstructure	myelinmap	spread	0.759196	0.00850359	0.46425	147	(0.9, 3, 0.1)	0	0	0.679322	higher
103	functional connectivity	Cortical expansion	devexp	syn	0.759003	0.012006	0.454122	52	(0.9, 2.5, 0.3)	0	0	0.679322	higher
104	functional connectivity	Receptors	5HT6	clear	0.758739	0.00821326	0.498557	39	(0.9, 3, 1)	0	0	0.679322	higher
105	functional connectivity	Receptors	M1	mis	0.758681	0.0101327	0.394727	220	(0.3, 2.5, 0.1)	0	0	0.679322	higher
106	functional connectivity	Receptors	VAChT	spread	0.758183	0.00774879	0.475486	160	(0.9, 3, 0.1)	1	0	0.679322	higher
107	functional connectivity	Celltype	OPC	spread	0.757994	0.00900529	0.458628	145	(0.9, 3, 0.1)	0	0	0.679322	higher
108	functional connectivity	Receptors	VAChT	clear	0.757217	0.0100093	0.348472	171	(0.1, 1, 0.1)	0	0	0.679322	higher
109	functional connectivity	Cortical expansion	evoexp	mis	0.756691	0.00975322	0.403545	195	(0.05, 3, 0.1)	0	0	0.679322	higher
110	functional connectivity	Celltype	Micro	syn	0.756481	0.00914772	0.390207	55	(0.3, 1.9, 0.7)	0	0	0.679322	higher
111	functional connectivity	Receptors	mGluR5	mis	0.756201	0.0102012	0.401593	284	(0.01, 2.9, 0.1)	0	0	0.679322	higher
112	functional connectivity	Receptors	NET	spread	0.754577	0.00921939	0.436488	147	(0.9, 3, 0.1)	0	0	0.679322	higher
113	functional connectivity	Receptors	M1	syn	0.754344	0.00878966	0.235874	166	(0.7, 1, 1)	0	0	0.679322	higher
114	functional connectivity	Receptors	H3	clear	0.753133	0.00978825	0.383287	171	(0.05, 1, 0.1)	0	0	0.679322	higher
115	functional connectivity	Receptors	A4B2	spread	0.753047	0.00894195	0.441966	150	(0.9, 3, 0.1)	0	0	0.679322	higher
116	functional connectivity	Celltype	Neuro-Ex	syn	0.751109	0.00983177	0.359295	74	(0.01, 1.9, 0.3)	0	0	0.679322	higher
117	functional connectivity	Receptors	D1	mis	0.750723	0.0103276	0.388249	302	(0.01, 3, 0.1)	0	0	0.679322	higher
118	functional connectivity	Receptors	5HT6	mis	0.750617	0.0110003	0.40715	67	(0.3, 3, 0.5)	0	0	0.679322	higher
119	functional connectivity	metabolism	cbv	syn	0.750234	0.0104353	0.376072	37	(0.3, 2.5, 1)	0	0	0.679322	higher
120	functional connectivity	Celltype	Neuro-In	syn	0.750185	0.00989371	0.352393	57	(0.01, 1.9, 0.5)	0	0	0.679322	higher
121	functional connectivity	Receptors	D1	syn	0.749653	0.00997122	0.261041	61	(0.5, 2, 1)	0	0	0.679322	higher
122	functional connectivity	Celltype	OPC	clear	0.747833	0.0113507	0.356339	155	(0.01, 1.5, 0.1)	0	0	0.679322	higher
123	functional connectivity	Receptors	NMDA	syn	0.747628	0.0100554	0.28811	42	(0.3, 2.9, 0.9)	0	0	0.679322	higher
124	functional connectivity	Celltype	Astro	clear	0.746935	0.0117333	0.379082	148	(0.01, 1.5, 0.1)	0	0	0.679322	higher
125	functional connectivity	Celltype	Astro	mis	0.74683	0.00962386	0.381924	272	(0.01, 2.9, 0.1)	0	0	0.679322	higher
126	functional connectivity	Celltype	Micro	clear	0.746532	0.0118182	0.363274	28	(0.05, 2.9, 0.9)	0	0	0.679322	higher
127	functional connectivity	metabolism	cmr02	spread	0.746461	0.00887222	0.432488	146	(0.9, 3, 0.1)	0	0	0.679322	higher
128	functional connectivity	Microstructure	genepc1	spread	0.745965	0.0082491	0.447877	150	(0.9, 3, 0.1)	0	0	0.679322	higher
129	functional connectivity	Receptors	MOR	mis	0.745675	0.0109675	0.357353	51	(0.3, 3, 1)	0	0	0.679322	higher
130	functional connectivity	Celltype	Endo	clear	0.745544	0.0123979	0.409125	33	(0.01, 1.5, 1)	0	0	0.679322	higher
131	functional connectivity	Celltype	OPC	mis	0.745445	0.00933994	0.380751	285	(0.01, 2.9, 0.1)	0	0	0.679322	higher
132	functional connectivity	Celltype	Micro	mis	0.742567	0.00943378	0.349952	234	(0.05, 3, 0.1)	0	0	0.679322	higher
133	functional connectivity	Receptors	NMDA	clear	0.740568	0.0108914	0.297647	188	(0.01, 0.9, 0.1)	0	0	0.679322	higher
134	functional connectivity	Celltype	Neuro-Ex	mis	0.740515	0.0112412	0.340178	218	(0.01, 2.5, 0.1)	0	0	0.679322	higher
135	functional connectivity	Receptors	5HTT	clear	0.739891	0.0110902	0.347221	195	(0.01, 1, 0.1)	0	0	0.679322	higher
136	functional connectivity	Receptors	5HT1b	spread	0.73864	0.00939248	0.407426	148	(0.9, 3, 0.1)	0	0	0.679322	higher
137	functional connectivity	Receptors	DAT	mis	0.737947	0.0111925	0.364437	265	(0.01, 3, 0.1)	0	0	0.679322	higher
138	functional connectivity	Celltype	Neuro-In	mis	0.737663	0.0114786	0.333125	222	(0.01, 2.5, 0.1)	0	0	0.679322	higher
139	functional connectivity	AD-realted	APOE	spread	0.737388	0.00926726	0.411825	145	(0.9, 3, 0.1)	0	0	0.679322	higher
140	functional connectivity	metabolism	cmrglc	spread	0.735443	0.00922887	0.408073	146	(0.9, 3, 0.1)	0	0	0.679322	higher
141	functional connectivity	Receptors	NMDA	mis	0.735321	0.0113491	0.352639	222	(0.1, 3, 0.1)	0	0	0.679322	higher
142	functional connectivity	Receptors	mGluR5	clear	0.733978	0.0118439	0.304238	259	(0.1, 0.5, 0.1)	0	0	0.679322	higher
143	functional connectivity	Receptors	VAChT	syn	0.733413	0.011048	0.244553	39	(0.3, 2.9, 1)	0	0	0.679322	higher
144	functional connectivity	AD-realted	Abeta	clear	0.733325	0.0128521	0.326425	409	(0.5, 0.1, 0.1)	0	0	0.679322	higher
145	functional connectivity	Celltype	Oligo	spread	0.732706	0.0101739	0.394688	145	(0.9, 3, 0.1)	0	0	0.679322	higher
146	functional connectivity	metabolism	cbv	clear	0.731874	0.0119472	0.298532	233	(0.01, 1, 0.1)	0	0	0.679322	higher
147	functional connectivity	Celltype	Endo	spread	0.731768	0.00965385	0.401098	143	(0.9, 3, 0.1)	0	0	0.679322	higher
148	functional connectivity	Celltype	Neuro-In	clear	0.730475	0.0107967	0.310859	320	(0.01, 0.9, 0.1)	0	0	0.679322	higher
149	functional connectivity	Celltype	Neuro-Ex	clear	0.730096	0.0110025	0.314757	340	(0.01, 0.9, 0.1)	0	0	0.679322	higher
150	functional connectivity	Cortical expansion	scalingpnc	clear	0.729833	0.0125783	0.331263	508	(0.01, 0.1, 0.1)	0	0	0.679322	higher
151	functional connectivity	Receptors	H3	syn	0.729534	0.0111584	0.336638	45	(0.1, 3, 1)	0	0	0.679322	higher
152	functional connectivity	metabolism	cbv	mis	0.729084	0.0124572	0.366446	57	(0.5, 3, 0.5)	0	0	0.679322	higher
153	functional connectivity	Cortical expansion	devexp	clear	0.728648	0.0123467	0.296278	305	(0.01, 0.5, 0.1)	0	0	0.679322	higher
154	functional connectivity	Microstructure	myelinmap	syn	0.728386	0.0118398	0.361127	34	(0.3, 3, 1)	0	0	0.679322	higher
155	functional connectivity	Celltype	Endo	mis	0.727241	0.0113155	0.30596	236	(0.01, 2.5, 0.1)	0	0	0.679322	higher
156	functional connectivity	metabolism	cbf	spread	0.72588	0.00965593	0.377898	146	(0.9, 3, 0.1)	0	0	0.679322	higher
157	functional connectivity	Receptors	D1	clear	0.725504	0.0123604	0.278487	265	(0.01, 0.5, 0.1)	0	0	0.679322	higher
158	functional connectivity	Cortical expansion	scaling	clear	0.723996	0.0129569	0.33162	499	(0.01, 0.1, 0.1)	0	0	0.679322	higher
159	functional connectivity	Receptors	GABAa	mis	0.723387	0.0126738	0.300601	288	(0.01, 1.9, 0.1)	0	0	0.679322	higher
160	functional connectivity	Celltype	Oligo	mis	0.723183	0.0121679	0.306675	245	(0.01, 2.5, 0.1)	0	0	0.679322	higher
161	functional connectivity	metabolism	cmr02	mis	0.722609	0.0125067	0.297132	240	(0.01, 2, 0.1)	0	0	0.679322	higher
162	functional connectivity	Microstructure	genepc1	mis	0.722365	0.0126273	0.295985	237	(0.01, 1.9, 0.1)	0	0	0.679322	higher
163	functional connectivity	Microstructure	myelinmap	mis	0.722211	0.0127455	0.295447	279	(0.01, 1.5, 0.1)	0	0	0.679322	higher
164	functional connectivity	Cortical expansion	scalingnih	clear	0.721965	0.0131067	0.322108	518	(0.01, 0.1, 0.1)	0	0	0.679322	higher
165	functional connectivity	metabolism	cmrglc	mis	0.721758	0.0123035	0.292123	188	(0.01, 2.9, 0.1)	0	0	0.679322	higher
166	functional connectivity	Receptors	5HTT	mis	0.721272	0.0128744	0.297855	376	(0.01, 1.5, 0.1)	0	0	0.679322	higher
167	functional connectivity	Receptors	CB1	clear	0.721149	0.013388	0.273354	524	(0.01, 0.1, 0.1)	0	0	0.679322	higher
168	functional connectivity	Receptors	H3	mis	0.721048	0.0129944	0.297338	381	(0.01, 1.5, 0.1)	0	0	0.679322	higher
169	functional connectivity	Cortical expansion	evoexp	clear	0.720891	0.0132844	0.294118	269	(0.01, 0.5, 0.1)	0	0	0.679322	higher
170	functional connectivity	AD-realted	APOE	mis	0.720813	0.0127375	0.293828	280	(0.01, 1.5, 0.1)	0	0	0.679322	higher
171	functional connectivity	Receptors	VAChT	mis	0.720034	0.013174	0.303392	530	(0.01, 0.5, 0.1)	0	0	0.679322	higher
172	functional connectivity	Receptors	A4B2	mis	0.720034	0.0130352	0.296187	431	(0.01, 0.9, 0.1)	0	0	0.679322	higher
173	functional connectivity	Receptors	5HT1b	mis	0.719996	0.0130504	0.294277	387	(0.01, 0.9, 0.1)	0	0	0.679322	higher
174	functional connectivity	Receptors	NET	mis	0.719801	0.013198	0.297093	463	(0.01, 0.5, 0.1)	0	0	0.679322	higher
175	functional connectivity	metabolism	cbf	mis	0.719725	0.0133068	0.29777	626	(0.01, 0.1, 0.1)	0	0	0.679322	higher
176	functional connectivity	Cortical expansion	scalinghcp	clear	0.719299	0.0133224	0.320747	494	(0.01, 0.1, 0.1)	0	0	0.679322	higher
177	functional connectivity	Cortical expansion	scalingpnc	syn	0.718035	0.0133961	0.185241	39	(0.9, 3, 1)	0	0	0.679322	higher
178	functional connectivity	Receptors	DAT	clear	0.716852	0.0126712	0.274983	319	(0.01, 0.5, 0.1)	0	0	0.679322	higher
179	functional connectivity	Receptors	MOR	clear	0.7153	0.0136579	0.277516	508	(0.01, 0.1, 0.1)	0	0	0.679322	higher
180	functional connectivity	Receptors	5HT4	clear	0.714895	0.0139778	0.271901	467	(0.01, 0.1, 0.1)	0	0	0.679322	higher
181	functional connectivity	Receptors	D2	clear	0.709861	0.0141249	0.27575	529	(0.01, 0.1, 0.1)	0	0	0.679322	higher
182	functional connectivity	AD-realted	MAPT	clear	0.708353	0.0143314	0.279957	506	(0.01, 0.1, 0.1)	0	0	0.679322	higher
183	functional connectivity	Receptors	5HT6	syn	0.707914	0.0130084	0.0905972	56	(0.5, 3, 1)	0	0	0.679322	higher
184	functional connectivity	Microstructure	thickness	clear	0.707871	0.0143021	0.276527	493	(0.01, 0.1, 0.1)	0	0	0.679322	higher
185	functional connectivity	Receptors	5HT1a	clear	0.706816	0.014284	0.274552	506	(0.01, 0.1, 0.1)	0	0	0.679322	higher
186	functional connectivity	Microstructure	genepc1	syn	0.689472	0.0145683	0.149649	41	(0.5, 3, 1)	0	0	0.679322	higher
187	functional connectivity	Receptors	5HT1b	syn	0.688112	0.0142228	0.208047	51	(0.3, 3, 1)	0	0	0.679322	higher
188	functional connectivity	AD-realted	Abeta	syn	0.686964	0.0149638	-0.00781383	48	(0.9, 3, 1)	0	0	0.679322	higher
189	functional connectivity	metabolism	cmrglc	syn	0.686064	0.0142751	0.169571	54	(0.1, 3, 1)	0	0	0.679322	higher
190	functional connectivity	Receptors	5HT2a	syn	0.681665	0.0145953	-0.0204134	74	(0.9, 2.9, 0.1)	0	0	0.679322	higher
191	functional connectivity	metabolism	cbf	syn	0.677519	0.014455	0.048074	50	(0.3, 3, 1)	0	0	0.679322	lower
192	functional connectivity	metabolism	cmr02	syn	0.676275	0.0150249	0.016168	47	(0.5, 3, 1)	0	0	0.679322	lower
193	functional connectivity	AD-realted	APOE	syn	0.664741	0.0161058	0.00190091	55	(0.7, 3, 0.9)	0	0	0.679322	lower
194	functional connectivity	Receptors	A4B2	syn	0.646563	0.0137487	-0.190644	2964	(0.01, 0.9, 0.1)	0	0	0.679322	lower
195	functional connectivity	Receptors	mGluR5	syn	0.639201	0.0148998	-0.321033	49	(0.1, 3, 1)	0	0	0.679322	lower
196	functional connectivity	Receptors	GABAa	syn	0.556286	0.0180067	-0.744507	74	(0.01, 3, 1)	0	0	0.679322	lower
197	functional connectivity	Receptors	NET	syn	0.537715	0.0175606	-0.865039	461	(0.01, 0.9, 1)	0	0	0.679322	lower
1	gene coexpression	Receptors	H3	clear	0.869231	0.00586586	0.747651	93	(0.7, 3, 0.1)	1	0	0.673513	higher
2	gene coexpression	Microstructure	myelinmap	spread	0.84917	0.00440075	0.681314	733	(0.9, 0.9, 0.3)	1	0	0.673513	higher
3	gene coexpression	Receptors	A4B2	clear	0.836198	0.00530667	0.682965	118	(0.5, 3, 0.1)	1	0	0.673513	higher
4	gene coexpression	Receptors	5HT1b	clear	0.835635	0.00654441	0.697042	55	(0.9, 3, 0.1)	1	0	0.673513	higher
5	gene coexpression	metabolism	cbv	spread	0.82278	0.00545562	0.624137	472	(0.05, 2.5, 0.1)	1	0	0.673513	higher
6	gene coexpression	Receptors	GABAa	clear	0.815269	0.00772079	0.659512	59	(0.9, 3, 0.1)	1	0	0.673513	higher
7	gene coexpression	Cortical expansion	scalinghcp	spread	0.804075	0.00643929	0.494623	115	(0.01, 1.5, 1)	1	0	0.673513	higher
8	gene coexpression	Microstructure	genepc1	spread	0.803716	0.0049926	0.585456	306	(0.3, 2.5, 0.1)	1	0	0.673513	higher
9	gene coexpression	Microstructure	thickness	mis	0.797659	0.00790096	0.569851	347	(0.5, 2.9, 0.1)	1	0	0.673513	higher
10	gene coexpression	Receptors	5HT1a	mis	0.782978	0.00840756	0.565641	439	(0.5, 2.5, 0.1)	1	0	0.673513	higher
11	gene coexpression	Microstructure	thickness	spread	0.782763	0.00660924	0.527319	270	(0.1, 3, 0.1)	0	0	0.673513	higher
12	gene coexpression	AD-realted	MAPT	mis	0.782379	0.00770087	0.550312	408	(0.5, 2.5, 0.1)	1	0	0.673513	higher
13	gene coexpression	Cortical expansion	scalinghcp	mis	0.781992	0.00832018	0.471347	108	(0.7, 1.9, 1)	0	0	0.673513	higher
14	gene coexpression	Microstructure	thickness	syn	0.780108	0.00847639	0.566747	95	(0.9, 3, 0.1)	0	0	0.673513	higher
15	gene coexpression	Receptors	D2	mis	0.778356	0.00939736	0.477674	112	(0.7, 3, 0.5)	1	0	0.673513	higher
16	gene coexpression	Receptors	M1	syn	0.775831	0.00546685	0.483792	236	(0.7, 0.9, 0.9)	1	0	0.673513	higher
17	gene coexpression	Receptors	mGluR5	clear	0.774048	0.0104004	0.567629	59	(0.7, 3, 0.3)	1	0	0.673513	higher
18	gene coexpression	AD-realted	APOE	spread	0.771619	0.00762426	0.45438	238	(0.5, 3, 0.1)	1	0	0.673513	higher
19	gene coexpression	metabolism	cmr02	spread	0.770114	0.00711935	0.527707	168	(0.9, 2.5, 0.5)	1	0	0.673513	higher
20	gene coexpression	Receptors	NET	clear	0.769184	0.00542124	0.57034	157	(0.3, 3, 0.1)	1	0	0.673513	higher
21	gene coexpression	metabolism	cbv	mis	0.767351	0.0088094	0.503241	102	(0.5, 3, 1)	0	0	0.673513	higher
22	gene coexpression	Receptors	VAChT	clear	0.764505	0.00645697	0.493599	160	(0.01, 1, 0.3)	1	0	0.673513	higher
23	gene coexpression	Cortical expansion	scaling	mis	0.763034	0.00749542	0.438581	218	(0.7, 1.5, 0.3)	1	0	0.673513	higher
24	gene coexpression	Receptors	5HT4	syn	0.761827	0.00810058	0.481693	1246	(0.9, 0.5, 0.1)	1	0	0.673513	higher
25	gene coexpression	Cortical expansion	scaling	spread	0.761823	0.0074555	0.419269	271	(0.01, 3, 0.1)	0	0	0.673513	higher
26	gene coexpression	Receptors	5HT4	mis	0.758875	0.00874874	0.430102	2788	(0.9, 0.9, 0.1)	0	0	0.673513	higher
27	gene coexpression	Receptors	5HT1a	syn	0.758359	0.0102567	0.520438	87	(0.9, 3, 0.1)	0	0	0.673513	higher
28	gene coexpression	AD-realted	MAPT	syn	0.755755	0.00711024	0.501702	300	(0.01, 2.9, 0.1)	0	0	0.673513	higher
29	gene coexpression	Receptors	5HT6	syn	0.754688	0.00499887	0.422644	288	(0.5, 0.9, 1)	1	0	0.673513	higher
30	gene coexpression	Receptors	D2	syn	0.754376	0.00862469	0.4638	85	(0.3, 3, 0.5)	0	0	0.673513	higher
31	gene coexpression	AD-realted	MAPT	spread	0.753763	0.00556624	0.477597	1717	(0.7, 0.9, 0.1)	0	0	0.673513	higher
32	gene coexpression	Cortical expansion	scalingnih	mis	0.751465	0.00918688	0.354452	520	(0.9, 1, 1)	1	0	0.673513	higher
33	gene coexpression	Receptors	5HTT	clear	0.750899	0.00883915	0.464244	64	(0.5, 0.9, 1)	1	0	0.673513	higher
34	gene coexpression	metabolism	cbv	syn	0.749795	0.00617725	0.499569	78	(0.3, 3, 1)	0	0	0.673513	higher
35	gene coexpression	Receptors	5HT2a	syn	0.748801	0.00919319	0.433485	107	(0.5, 2, 0.3)	1	0	0.673513	higher
36	gene coexpression	Receptors	NMDA	syn	0.748505	0.00451941	0.338613	1334	(0.3, 1, 0.1)	1	0	0.673513	higher
37	gene coexpression	Receptors	5HT6	clear	0.747928	0.0107234	0.523247	75	(0.7, 3, 0.1)	0	0	0.673513	higher
38	gene coexpression	Receptors	5HT1a	spread	0.746762	0.00678077	0.478527	385	(0.05, 2.5, 0.1)	0	0	0.673513	higher
39	gene coexpression	Cortical expansion	scalinghcp	syn	0.74583	0.0107096	0.36095	52	(0.7, 3, 1)	0	0	0.673513	higher
40	gene coexpression	Celltype	Micro	spread	0.744794	0.00802266	0.473703	234	(0.5, 3, 0.1)	1	0	0.673513	higher
41	gene coexpression	metabolism	cmrglc	spread	0.742249	0.00865006	0.456666	174	(0.9, 2.9, 0.1)	1	0	0.673513	higher
42	gene coexpression	Cortical expansion	scalingpnc	spread	0.742171	0.00855654	0.442508	197	(0.5, 3, 0.1)	1	0	0.673513	higher
43	gene coexpression	Microstructure	myelinmap	mis	0.740387	0.0118673	0.3985	93	(0.7, 3, 1)	0	0	0.673513	higher
44	gene coexpression	Cortical expansion	scaling	syn	0.740042	0.0103375	0.405283	50	(0.7, 3, 0.7)	0	0	0.673513	higher
45	gene coexpression	Cortical expansion	scalingnih	spread	0.73675	0.00807331	0.349206	346	(0.01, 2.5, 0.1)	0	0	0.673513	higher
46	gene coexpression	Celltype	Astro	spread	0.734731	0.00895771	0.4532	223	(0.5, 3, 0.1)	1	0	0.673513	higher
47	gene coexpression	Cortical expansion	evoexp	syn	0.734476	0.00785718	0.433127	292	(0.7, 1, 0.1)	1	0	0.673513	higher
48	gene coexpression	Receptors	M1	clear	0.732718	0.0145501	0.457591	25	(0.9, 2.5, 0.1)	0	0	0.673513	higher
49	gene coexpression	Cortical expansion	evoexp	clear	0.731807	0.0129826	0.463073	29	(0.1, 3, 1)	0	0	0.673513	higher
50	gene coexpression	Receptors	5HT2a	clear	0.72956	0.0144662	0.449949	29	(0.9, 1.9, 0.1)	0	0	0.673513	higher
51	gene coexpression	Cortical expansion	devexp	syn	0.729472	0.00713635	0.292147	1145	(0.01, 1, 0.1)	1	0	0.673513	higher
52	gene coexpression	Receptors	D2	spread	0.728929	0.00877169	0.425744	204	(0.5, 3, 0.1)	0	0	0.673513	higher
53	gene coexpression	Receptors	VAChT	syn	0.728779	0.00489037	0.279434	2167	(0.1, 0.9, 0.1)	0	0	0.673513	higher
54	gene coexpression	Receptors	M1	mis	0.728391	0.0101486	0.403168	936	(0.9, 1, 0.3)	0	0	0.673513	higher
55	gene coexpression	metabolism	cbf	spread	0.727146	0.00886262	0.445248	167	(0.9, 3, 0.1)	1	0	0.673513	higher
56	gene coexpression	Cortical expansion	scalingpnc	syn	0.726819	0.009102	0.413249	53	(0.5, 3, 0.7)	0	0	0.673513	higher
57	gene coexpression	Receptors	5HT2a	mis	0.726179	0.0118469	0.414912	90	(0.9, 3, 0.1)	0	0	0.673513	higher
58	gene coexpression	Cortical expansion	scalingpnc	mis	0.724234	0.0103401	0.349726	165	(0.9, 1.5, 1)	0	0	0.673513	higher
59	gene coexpression	Receptors	5HT1b	syn	0.723149	0.0075349	0.28341	274	(0.01, 0.9, 1)	0	0	0.673513	higher
60	gene coexpression	Celltype	Endo	syn	0.721654	0.00446056	0.283463	475	(0.5, 0.9, 0.3)	1	0	0.673513	higher
61	gene coexpression	Receptors	NMDA	clear	0.721608	0.0105708	0.290391	51	(0.01, 1.9, 1)	0	0	0.673513	higher
62	gene coexpression	Receptors	H3	syn	0.721536	0.00697798	0.281306	1873	(0.01, 0.9, 0.1)	0	0	0.673513	higher
63	gene coexpression	Celltype	OPC	spread	0.720814	0.00922411	0.422897	226	(0.5, 3, 0.1)	1	0	0.673513	higher
64	gene coexpression	Celltype	Endo	clear	0.720122	0.012621	0.373803	43	(0.3, 2.9, 0.1)	0	0	0.673513	higher
65	gene coexpression	AD-realted	Abeta	clear	0.71716	0.0147005	0.400615	35	(0.9, 3, 0.1)	1	0	0.673513	higher
66	gene coexpression	Receptors	5HT4	clear	0.714136	0.014651	0.345114	91	(0.7, 0.9, 0.1)	0	0	0.673513	higher
67	gene coexpression	Celltype	Astro	syn	0.711977	0.0132337	0.359757	97	(0.9, 2.5, 0.1)	0	0	0.673513	higher
68	gene coexpression	Cortical expansion	evoexp	mis	0.711494	0.0120724	0.327816	113	(0.9, 3, 0.1)	0	0	0.673513	higher
69	gene coexpression	Receptors	mGluR5	syn	0.71124	0.00819824	0.220328	1240	(0.1, 1, 0.1)	0	0	0.673513	higher
70	gene coexpression	Celltype	Oligo	clear	0.708922	0.00920778	0.375333	337	(0.7, 0.1, 0.9)	1	0	0.673513	higher
71	gene coexpression	Celltype	Astro	mis	0.708294	0.0135366	0.3356	120	(0.9, 3, 0.1)	0	0	0.673513	higher
72	gene coexpression	Microstructure	genepc1	mis	0.706094	0.0138546	0.315041	102	(0.9, 3, 1)	0	0	0.673513	higher
73	gene coexpression	Cortical expansion	scalingnih	syn	0.704955	0.0112412	0.239972	48	(0.7, 3, 1)	0	0	0.673513	higher
74	gene coexpression	Receptors	5HT2a	spread	0.702945	0.0106151	0.325734	224	(0.7, 2.5, 0.1)	0	0	0.673513	higher
75	gene coexpression	Receptors	MOR	clear	0.702576	0.0134072	0.292623	34	(0.01, 3, 1)	1	0	0.673513	higher
76	gene coexpression	AD-realted	Abeta	syn	0.70229	0.00998658	0.294815	174	(0.01, 3, 0.1)	0	0	0.673513	higher
77	gene coexpression	Receptors	GABAa	syn	0.701984	0.00890683	0.250344	234	(0.01, 0.9, 1)	0	0	0.673513	higher
78	gene coexpression	Cortical expansion	devexp	clear	0.701699	0.0139979	0.31326	108	(0.01, 2, 0.1)	0	0	0.673513	higher
79	gene coexpression	Receptors	NET	syn	0.70161	0.00859008	0.231818	254	(0.01, 0.9, 1)	0	0	0.673513	higher
80	gene coexpression	Receptors	M1	spread	0.701593	0.0107379	0.327834	226	(0.7, 2.5, 0.1)	0	0	0.673513	higher
81	gene coexpression	Receptors	5HT4	spread	0.700772	0.00907776	0.328925	201	(0.5, 3, 0.1)	0	0	0.673513	higher
82	gene coexpression	Receptors	CB1	syn	0.699531	0.00755781	0.182354	1049	(0.01, 0.9, 0.1)	1	0	0.673513	higher
83	gene coexpression	Receptors	A4B2	syn	0.697389	0.00816477	0.232571	210	(0.01, 0.9, 1)	0	0	0.673513	higher
84	gene coexpression	Receptors	D1	syn	0.696293	0.00654128	0.221838	1181	(0.1, 1, 0.1)	1	0	0.673513	higher
85	gene coexpression	Celltype	Endo	mis	0.694687	0.0123689	0.260067	221	(0.9, 1.5, 1)	0	0	0.673513	higher
86	gene coexpression	Microstructure	genepc1	syn	0.694494	0.014551	0.277045	71	(0.9, 3, 1)	0	0	0.673513	higher
87	gene coexpression	Celltype	Oligo	spread	0.694386	0.0109814	0.272602	237	(0.5, 3, 0.1)	0	0	0.673513	higher
88	gene coexpression	Microstructure	myelinmap	syn	0.691286	0.0127446	0.324694	84	(0.9, 3, 0.3)	0	0	0.673513	higher
89	gene coexpression	Receptors	MOR	syn	0.690042	0.0113448	0.260718	18668	(0.01, 0.5, 0.1)	0	0	0.673513	higher
90	gene coexpression	Celltype	OPC	syn	0.68947	0.0139971	0.284131	119	(0.9, 2, 0.1)	0	0	0.673513	higher
91	gene coexpression	Celltype	OPC	mis	0.689046	0.0140224	0.278345	127	(0.9, 3, 0.1)	0	0	0.673513	higher
92	gene coexpression	Celltype	Neuro-In	clear	0.688471	0.0133047	0.304057	24	(0.01, 3, 1)	1	0	0.673513	higher
93	gene coexpression	Celltype	Neuro-Ex	clear	0.687556	0.014055	0.296398	23	(0.3, 3, 0.9)	1	0	0.673513	higher
94	gene coexpression	AD-realted	Cluster7	mis	0.686336	0.0085648	0.332068	193	(0.5, 3, 0.1)	0	0	0.673513	higher
95	gene coexpression	AD-realted	Cluster1	syn	0.686336	0.0085648	0.332068	193	(0.5, 3, 0.1)	1	0	0.673513	higher
96	gene coexpression	AD-realted	Cluster7	spread	0.686336	0.0085648	0.332068	193	(0.5, 3, 0.1)	0	0	0.673513	higher
97	gene coexpression	AD-realted	Cluster7	syn	0.686336	0.0085648	0.332068	193	(0.5, 3, 0.1)	1	0	0.673513	higher
98	gene coexpression	AD-realted	Cluster6	mis	0.686336	0.0085648	0.332068	193	(0.5, 3, 0.1)	0	0	0.673513	higher
99	gene coexpression	AD-realted	Cluster1	spread	0.686336	0.0085648	0.332068	193	(0.5, 3, 0.1)	0	0	0.673513	higher
100	gene coexpression	AD-realted	Cluster6	spread	0.686336	0.0085648	0.332068	193	(0.5, 3, 0.1)	0	0	0.673513	higher
101	gene coexpression	AD-realted	Cluster6	syn	0.686336	0.0085648	0.332068	193	(0.5, 3, 0.1)	1	0	0.673513	higher
102	gene coexpression	AD-realted	Cluster1	mis	0.686336	0.0085648	0.332068	193	(0.5, 3, 0.1)	0	0	0.673513	higher
103	gene coexpression	AD-realted	Cluster3	clear	0.686336	0.0085648	0.332068	193	(0.5, 3, 0.1)	0	0	0.673513	higher
104	gene coexpression	AD-realted	Cluster3	spread	0.686336	0.0085648	0.332068	193	(0.5, 3, 0.1)	0	0	0.673513	higher
105	gene coexpression	AD-realted	Cluster3	syn	0.686336	0.0085648	0.332068	193	(0.5, 3, 0.1)	1	0	0.673513	higher
106	gene coexpression	AD-realted	Cluster2	clear	0.686336	0.0085648	0.332068	193	(0.5, 3, 0.1)	0	0	0.673513	higher
107	gene coexpression	AD-realted	Cluster1	clear	0.686336	0.0085648	0.332068	193	(0.5, 3, 0.1)	0	0	0.673513	higher
108	gene coexpression	AD-realted	Cluster2	mis	0.686336	0.0085648	0.332068	193	(0.5, 3, 0.1)	0	0	0.673513	higher
109	gene coexpression	AD-realted	Cluster2	spread	0.686336	0.0085648	0.332068	193	(0.5, 3, 0.1)	0	0	0.673513	higher
110	gene coexpression	AD-realted	Cluster2	syn	0.686336	0.0085648	0.332068	193	(0.5, 3, 0.1)	1	0	0.673513	higher
111	gene coexpression				0.686336	0.0085648	0.332068	193	(0.5, 3, 0.1)	0	1	0.673513	higher
112	gene coexpression	AD-realted	Cluster7	clear	0.686336	0.0085648	0.332068	193	(0.5, 3, 0.1)	0	0	0.673513	higher
113	gene coexpression	AD-realted	Cluster5	syn	0.686336	0.0085648	0.332068	193	(0.5, 3, 0.1)	1	0	0.673513	higher
114	gene coexpression	AD-realted	Cluster3	mis	0.686336	0.0085648	0.332068	193	(0.5, 3, 0.1)	0	0	0.673513	higher
115	gene coexpression	AD-realted	Cluster4	syn	0.686336	0.0085648	0.332068	193	(0.5, 3, 0.1)	1	0	0.673513	higher
116	gene coexpression	AD-realted	Cluster4	spread	0.686336	0.0085648	0.332068	193	(0.5, 3, 0.1)	0	0	0.673513	higher
117	gene coexpression	AD-realted	Cluster4	mis	0.686336	0.0085648	0.332068	193	(0.5, 3, 0.1)	0	0	0.673513	higher
118	gene coexpression	AD-realted	Cluster4	clear	0.686336	0.0085648	0.332068	193	(0.5, 3, 0.1)	0	0	0.673513	higher
119	gene coexpression	AD-realted	Cluster5	spread	0.686336	0.0085648	0.332068	193	(0.5, 3, 0.1)	0	0	0.673513	higher
120	gene coexpression	AD-realted	Cluster5	mis	0.686336	0.0085648	0.332068	193	(0.5, 3, 0.1)	0	0	0.673513	higher
121	gene coexpression	AD-realted	Cluster5	clear	0.686336	0.0085648	0.332068	193	(0.5, 3, 0.1)	0	0	0.673513	higher
122	gene coexpression	AD-realted	Cluster6	clear	0.686336	0.0085648	0.332068	193	(0.5, 3, 0.1)	0	0	0.673513	higher
123	gene coexpression	AD-realted	Abeta	mis	0.684939	0.0109139	0.263138	858	(0.9, 1, 0.1)	0	0	0.673513	higher
124	gene coexpression	Celltype	Neuro-Ex	spread	0.683972	0.00941576	0.315663	226	(0.5, 3, 0.1)	0	0	0.673513	higher
125	gene coexpression	Celltype	Endo	spread	0.683258	0.0110761	0.292407	220	(0.5, 3, 0.1)	0	0	0.673513	higher
126	gene coexpression	AD-realted	Abeta	spread	0.680351	0.0114982	0.269851	211	(0.7, 2.5, 0.1)	0	0	0.673513	higher
127	gene coexpression	Receptors	5HTT	syn	0.679712	0.0127124	0.268544	4542	(0.5, 0.1, 0.1)	0	0	0.673513	higher
128	gene coexpression	metabolism	cmr02	mis	0.679067	0.0128572	0.248573	76	(0.7, 3, 1)	0	0	0.673513	higher
129	gene coexpression	Celltype	Micro	syn	0.677676	0.0152129	0.254493	73	(0.9, 3, 0.1)	0	0	0.673513	higher
130	gene coexpression	Receptors	DAT	clear	0.677124	0.0132508	0.225276	27	(0.01, 3, 1)	1	0	0.673513	higher
131	gene coexpression	Cortical expansion	evoexp	spread	0.676654	0.00918865	0.298443	207	(0.5, 3, 0.1)	0	0	0.673513	higher
132	gene coexpression	Cortical expansion	devexp	mis	0.673669	0.0115592	0.258806	29999	(0.9, 0.9, 0.7)	0	0	0.673513	higher
133	gene coexpression	Celltype	Micro	mis	0.672269	0.0137504	0.266109	650	(0.9, 1, 0.1)	0	0	0.673513	lower
134	gene coexpression	Receptors	D2	clear	0.670313	0.0159119	0.199484	68	(0.9, 1.5, 0.1)	0	0	0.673513	lower
135	gene coexpression	AD-realted	APOE	mis	0.669457	0.0154461	0.229139	74	(0.9, 3, 1)	0	0	0.673513	lower
136	gene coexpression	Receptors	CB1	clear	0.668719	0.015133	0.131756	78	(0.01, 1.9, 0.3)	0	0	0.673513	lower
137	gene coexpression	Celltype	Neuro-In	syn	0.668064	0.0150201	0.226951	3514	(0.7, 0.1, 0.1)	0	0	0.673513	lower
138	gene coexpression	Microstructure	myelinmap	clear	0.667732	0.0162165	0.233051	29	(0.7, 0.1, 1)	0	0	0.673513	lower
139	gene coexpression	metabolism	cmr02	clear	0.66682	0.0161352	0.227897	26	(0.7, 0.1, 1)	0	0	0.673513	lower
140	gene coexpression	Celltype	Neuro-Ex	syn	0.665547	0.00826476	0.2677	98	(0.3, 3, 0.7)	0	0	0.673513	lower
141	gene coexpression	Celltype	Neuro-Ex	mis	0.665069	0.013907	0.238839	1286	(0.9, 1, 0.1)	0	0	0.673513	lower
142	gene coexpression	Cortical expansion	scaling	clear	0.664818	0.0162558	0.227441	28	(0.7, 0.1, 1)	0	0	0.673513	lower
143	gene coexpression	Microstructure	genepc1	clear	0.664731	0.0165616	0.217339	35	(0.9, 0.1, 1)	0	0	0.673513	lower
144	gene coexpression	Cortical expansion	scalinghcp	clear	0.664715	0.0164213	0.220403	27	(0.7, 0.1, 1)	0	0	0.673513	lower
145	gene coexpression	AD-realted	APOE	clear	0.66455	0.0162688	0.22319	24	(0.7, 0.1, 1)	0	0	0.673513	lower
146	gene coexpression	metabolism	cmrglc	clear	0.664335	0.0163023	0.22278	23	(0.7, 0.1, 1)	0	0	0.673513	lower
147	gene coexpression	Celltype	Oligo	syn	0.664124	0.0161646	0.210408	100	(0.9, 3, 0.1)	0	0	0.673513	lower
148	gene coexpression	Cortical expansion	scalingnih	clear	0.66396	0.0163139	0.223323	28	(0.7, 0.1, 1)	0	0	0.673513	lower
149	gene coexpression	Cortical expansion	scalingpnc	clear	0.663909	0.0162488	0.224372	25	(0.7, 0.1, 1)	0	0	0.673513	lower
150	gene coexpression	Microstructure	thickness	clear	0.663847	0.0166091	0.220869	25	(0.7, 0.1, 1)	0	0	0.673513	lower
151	gene coexpression	Receptors	D1	clear	0.663826	0.0149828	0.119855	44	(0.01, 2, 1)	0	0	0.673513	lower
152	gene coexpression	Receptors	DAT	syn	0.66324	0.00613245	0.263772	1191	(0.05, 0.9, 0.1)	0	0	0.673513	lower
153	gene coexpression	metabolism	cbv	clear	0.662876	0.0166481	0.219429	22	(0.7, 0.1, 1)	0	0	0.673513	lower
154	gene coexpression	Celltype	Oligo	mis	0.662633	0.01581	0.175964	77	(0.7, 3, 1)	0	0	0.673513	lower
155	gene coexpression	metabolism	cbf	mis	0.662583	0.0160363	0.21501	96	(0.9, 1.5, 1)	0	0	0.673513	lower
156	gene coexpression	metabolism	cmrglc	mis	0.662459	0.0162475	0.214467	60	(0.9, 2.5, 1)	0	0	0.673513	lower
157	gene coexpression	AD-realted	APOE	syn	0.662253	0.0165292	0.173381	86	(0.9, 3, 0.1)	0	0	0.673513	lower
158	gene coexpression	metabolism	cmrglc	syn	0.662072	0.0172736	0.20673	2	(0.9, 3, 0.1)	0	0	0.673513	lower
159	gene coexpression	Receptors	D1	mis	0.66206	0.0172758	0.208509	2	(0.9, 3, 0.1)	0	0	0.673513	lower
160	gene coexpression	Receptors	NMDA	mis	0.662058	0.0172832	0.204036	2	(0.9, 3, 0.1)	0	0	0.673513	lower
161	gene coexpression	Receptors	CB1	mis	0.662053	0.01728	0.201977	2	(0.9, 1.5, 0.1)	0	0	0.673513	lower
162	gene coexpression	Receptors	VAChT	mis	0.662052	0.0172879	0.202203	2	(0.9, 3, 0.1)	0	0	0.673513	lower
163	gene coexpression	Receptors	DAT	mis	0.66205	0.0173113	0.207693	2	(0.9, 3, 0.1)	0	0	0.673513	lower
164	gene coexpression	Receptors	MOR	mis	0.662049	0.0173047	0.2028	2	(0.9, 2.9, 0.1)	0	0	0.673513	lower
165	gene coexpression	Celltype	OPC	clear	0.662036	0.0172547	0.216545	2	(0.9, 0.1, 0.1)	0	0	0.673513	lower
166	gene coexpression	Receptors	mGluR5	mis	0.662032	0.0172581	0.216969	2	(0.9, 3, 0.1)	0	0	0.673513	lower
167	gene coexpression	Receptors	5HT1a	clear	0.662025	0.0172557	0.213289	2	(0.9, 2.5, 1)	0	0	0.673513	lower
168	gene coexpression	Celltype	Neuro-In	mis	0.662016	0.0172941	0.214394	2	(0.9, 3, 0.1)	0	0	0.673513	lower
169	gene coexpression	Celltype	Micro	clear	0.662005	0.0172817	0.212449	2	(0.9, 0.9, 0.1)	0	0	0.673513	lower
170	gene coexpression	Receptors	5HT6	mis	0.661995	0.017261	0.211923	2	(0.9, 3, 0.1)	0	0	0.673513	lower
171	gene coexpression	metabolism	cbf	syn	0.661994	0.0172916	0.189161	2	(0.9, 3, 0.1)	0	0	0.673513	lower
172	gene coexpression	metabolism	cbf	clear	0.661993	0.0172905	0.188746	12	(0.9, 2, 0.1)	0	0	0.673513	lower
173	gene coexpression	Receptors	NET	mis	0.661993	0.0172604	0.211691	2	(0.9, 3, 0.1)	0	0	0.673513	lower
174	gene coexpression	Receptors	5HTT	mis	0.66199	0.0173012	0.211153	2	(0.9, 2, 0.1)	0	0	0.673513	lower
175	gene coexpression	Receptors	NMDA	spread	0.661987	0.0173016	0.211008	2	(0.9, 2, 0.1)	0	0	0.673513	lower
176	gene coexpression	Receptors	5HTT	spread	0.661987	0.0173016	0.211006	2	(0.9, 2, 0.1)	0	0	0.673513	lower
177	gene coexpression	Receptors	D1	spread	0.661987	0.0173015	0.211006	2	(0.9, 2, 0.1)	0	0	0.673513	lower
178	gene coexpression	Cortical expansion	devexp	spread	0.661986	0.0173016	0.211004	2	(0.9, 2, 0.1)	0	0	0.673513	lower
179	gene coexpression	Receptors	NET	spread	0.661986	0.0173016	0.211003	2	(0.9, 2, 0.1)	0	0	0.673513	lower
180	gene coexpression	Receptors	GABAa	mis	0.661986	0.0172609	0.210989	2	(0.9, 3, 0.1)	0	0	0.673513	lower
181	gene coexpression	Receptors	CB1	spread	0.661986	0.0173015	0.211009	2	(0.9, 2, 0.1)	0	0	0.673513	lower
182	gene coexpression	Receptors	A4B2	spread	0.661986	0.0173016	0.211003	2	(0.9, 2, 0.1)	0	0	0.673513	lower
183	gene coexpression	Receptors	A4B2	mis	0.661986	0.0172611	0.210944	2	(0.9, 3, 0.1)	0	0	0.673513	lower
184	gene coexpression	Receptors	5HT1b	spread	0.661986	0.0173016	0.211001	2	(0.9, 2, 0.1)	0	0	0.673513	lower
185	gene coexpression	Receptors	MOR	spread	0.661986	0.0173016	0.211005	2	(0.9, 2, 0.1)	0	0	0.673513	lower
186	gene coexpression	Receptors	GABAa	spread	0.661985	0.0173016	0.211	2	(0.9, 2, 0.1)	0	0	0.673513	lower
187	gene coexpression	Receptors	VAChT	spread	0.661985	0.0173016	0.211004	2	(0.9, 2, 0.1)	0	0	0.673513	lower
188	gene coexpression	Receptors	mGluR5	spread	0.661985	0.0173016	0.211001	2	(0.9, 2, 0.1)	0	0	0.673513	lower
189	gene coexpression	Receptors	5HT1b	mis	0.661985	0.0172611	0.210736	2	(0.9, 0.1, 0.1)	0	0	0.673513	lower
190	gene coexpression	Receptors	H3	mis	0.661985	0.0172614	0.210727	2	(0.9, 0.1, 0.1)	0	0	0.673513	lower
191	gene coexpression	Receptors	H3	spread	0.661984	0.0173016	0.210999	2	(0.9, 2, 0.1)	0	0	0.673513	lower
192	gene coexpression	Celltype	Neuro-In	spread	0.661983	0.0172397	0.211934	3	(0.9, 3, 0.1)	0	0	0.673513	lower
193	gene coexpression	AD-realted	MAPT	clear	0.661981	0.0172681	0.210275	2	(0.9, 3, 0.1)	0	0	0.673513	lower
194	gene coexpression	Receptors	5HT6	spread	0.661964	0.0173061	0.209373	2	(0.7, 2.5, 0.1)	0	0	0.673513	lower
195	gene coexpression	Receptors	DAT	spread	0.661955	0.017308	0.208642	2	(0.5, 3, 0.1)	0	0	0.673513	lower
196	gene coexpression	Celltype	Astro	clear	0.661953	0.0173105	0.208262	2	(0.9, 3, 0.1)	0	0	0.673513	lower
197	gene coexpression	metabolism	cmr02	syn	0.66139	0.0173133	0.180457	2	(0.01, 3, 0.1)	0	0	0.673513	lower
1	receptor similarity	AD-realted	MAPT	spread	0.919978	0.00281319	0.836551	190	(0.01, 1.5, 0.7)	1	0	0.662213	higher
2	receptor similarity	AD-realted	MAPT	mis	0.915988	0.00266623	0.829239	362	(0.01, 1.5, 0.5)	0	0	0.662213	higher
3	receptor similarity	Receptors	H3	clear	0.898602	0.00440892	0.805782	64	(0.1, 3, 1)	1	0	0.662213	higher
4	receptor similarity	Cortical expansion	scalinghcp	mis	0.896615	0.00424754	0.784151	101	(0.01, 2, 0.9)	1	0	0.662213	higher
5	receptor similarity	Receptors	5HT4	syn	0.896503	0.00415451	0.796768	412	(0.5, 1, 0.1)	1	0	0.662213	higher
6	receptor similarity	Cortical expansion	scaling	syn	0.895948	0.00426325	0.778893	108	(0.01, 2.5, 0.3)	1	0	0.662213	higher
7	receptor similarity	Cortical expansion	scaling	mis	0.89578	0.00428778	0.773177	94	(0.01, 2, 0.9)	0	0	0.662213	higher
8	receptor similarity	Cortical expansion	scalingnih	syn	0.89536	0.00485136	0.766531	217	(0.05, 2.5, 0.1)	1	0	0.662213	higher
9	receptor similarity	Cortical expansion	scalinghcp	syn	0.893763	0.00398552	0.78357	223	(0.05, 2.5, 0.1)	0	0	0.662213	higher
10	receptor similarity	AD-realted	MAPT	syn	0.893543	0.00368399	0.796564	142	(0.7, 3, 0.1)	0	0	0.662213	higher
11	receptor similarity	Cortical expansion	scalinghcp	spread	0.891791	0.00485341	0.775609	712	(0.05, 1.5, 0.1)	0	0	0.662213	higher
12	receptor similarity	Cortical expansion	scalingpnc	syn	0.891281	0.00440977	0.773585	68	(0.05, 2.5, 0.7)	1	0	0.662213	higher
13	receptor similarity	Cortical expansion	evoexp	syn	0.889829	0.00453325	0.785787	155	(0.7, 1, 0.5)	1	0	0.662213	higher
14	receptor similarity	Cortical expansion	scalingpnc	mis	0.889131	0.00483881	0.760137	66	(0.01, 2.5, 1)	0	0	0.662213	higher
15	receptor similarity	Celltype	Endo	syn	0.889097	0.0033563	0.76951	172	(0.5, 1, 1)	1	0	0.662213	higher
16	receptor similarity	Cortical expansion	scalingnih	mis	0.888104	0.00463264	0.748014	141	(0.01, 2, 0.5)	0	0	0.662213	higher
17	receptor similarity	Receptors	5HT4	mis	0.888044	0.00474799	0.757473	384	(0.01, 2.5, 0.1)	0	0	0.662213	higher
18	receptor similarity	Receptors	A4B2	clear	0.88781	0.00431493	0.787524	108	(0.01, 3, 0.3)	1	0	0.662213	higher
19	receptor similarity	Receptors	D2	syn	0.885774	0.00303071	0.76792	972	(0.1, 1, 0.1)	1	0	0.662213	higher
20	receptor similarity	Receptors	M1	syn	0.883297	0.00411396	0.748664	76	(0.01, 2, 1)	1	0	0.662213	higher
21	receptor similarity	Receptors	VAChT	clear	0.883294	0.0038762	0.755547	194	(0.01, 0.5, 0.7)	1	0	0.662213	higher
22	receptor similarity	metabolism	cbf	clear	0.882113	0.00616169	0.775098	54	(0.01, 3, 1)	1	0	0.662213	higher
23	receptor similarity	Receptors	5HTT	clear	0.881888	0.00542154	0.745806	66	(0.01, 1, 1)	1	0	0.662213	higher
24	receptor similarity	Receptors	5HTT	syn	0.881242	0.00357753	0.760557	1395	(0.01, 0.9, 0.1)	0	0	0.662213	higher
25	receptor similarity	Microstructure	thickness	syn	0.880073	0.00238839	0.741167	953	(0.01, 1, 0.1)	1	0	0.662213	higher
26	receptor similarity	Receptors	5HT2a	syn	0.879663	0.00499927	0.744603	56	(0.01, 2.5, 1)	1	0	0.662213	higher
27	receptor similarity	Celltype	Micro	spread	0.878046	0.00590868	0.764839	212	(0.9, 1.9, 0.7)	1	0	0.662213	higher
28	receptor similarity	Cortical expansion	scaling	spread	0.876804	0.00536689	0.737714	412	(0.01, 2, 0.1)	0	0	0.662213	higher
29	receptor similarity	Receptors	CB1	syn	0.876746	0.0038731	0.682169	157	(0.1, 1, 1)	1	0	0.662213	higher
30	receptor similarity	metabolism	cbv	spread	0.876262	0.00594834	0.751841	264	(0.1, 3, 0.1)	1	0	0.662213	higher
31	receptor similarity	Receptors	5HT6	syn	0.876167	0.00528512	0.733746	51	(0.01, 3, 1)	1	0	0.662213	higher
32	receptor similarity	Receptors	MOR	syn	0.87615	0.00332661	0.728144	150	(0.01, 1, 1)	1	0	0.662213	higher
33	receptor similarity	Microstructure	genepc1	spread	0.875685	0.00524388	0.758115	136	(0.7, 3, 0.5)	1	0	0.662213	higher
34	receptor similarity	AD-realted	Cluster1	spread	0.874807	0.00389695	0.748084	252	(0.01, 2.9, 0.1)	0	0	0.662213	higher
35	receptor similarity	AD-realted	Cluster1	syn	0.874807	0.00389695	0.748084	252	(0.01, 2.9, 0.1)	1	0	0.662213	higher
36	receptor similarity				0.874807	0.00389695	0.748084	252	(0.01, 2.9, 0.1)	0	1	0.662213	higher
37	receptor similarity	AD-realted	Cluster1	mis	0.874807	0.00389695	0.748084	252	(0.01, 2.9, 0.1)	0	0	0.662213	higher
38	receptor similarity	AD-realted	Cluster4	mis	0.874807	0.00389695	0.748084	252	(0.01, 2.9, 0.1)	0	0	0.662213	higher
39	receptor similarity	AD-realted	Cluster6	clear	0.874807	0.00389695	0.748084	252	(0.01, 2.9, 0.1)	0	0	0.662213	higher
40	receptor similarity	AD-realted	Cluster6	mis	0.874807	0.00389695	0.748084	252	(0.01, 2.9, 0.1)	0	0	0.662213	higher
41	receptor similarity	AD-realted	Cluster6	spread	0.874807	0.00389695	0.748084	252	(0.01, 2.9, 0.1)	0	0	0.662213	higher
42	receptor similarity	AD-realted	Cluster6	syn	0.874807	0.00389695	0.748084	252	(0.01, 2.9, 0.1)	1	0	0.662213	higher
43	receptor similarity	AD-realted	Cluster5	clear	0.874807	0.00389695	0.748084	252	(0.01, 2.9, 0.1)	0	0	0.662213	higher
44	receptor similarity	AD-realted	Cluster5	mis	0.874807	0.00389695	0.748084	252	(0.01, 2.9, 0.1)	0	0	0.662213	higher
45	receptor similarity	AD-realted	Cluster5	spread	0.874807	0.00389695	0.748084	252	(0.01, 2.9, 0.1)	0	0	0.662213	higher
46	receptor similarity	AD-realted	Cluster5	syn	0.874807	0.00389695	0.748084	252	(0.01, 2.9, 0.1)	1	0	0.662213	higher
47	receptor similarity	AD-realted	Cluster1	clear	0.874807	0.00389695	0.748084	252	(0.01, 2.9, 0.1)	0	0	0.662213	higher
48	receptor similarity	AD-realted	Cluster4	clear	0.874807	0.00389695	0.748084	252	(0.01, 2.9, 0.1)	0	0	0.662213	higher
49	receptor similarity	AD-realted	Cluster4	spread	0.874807	0.00389695	0.748084	252	(0.01, 2.9, 0.1)	0	0	0.662213	higher
50	receptor similarity	AD-realted	Cluster4	syn	0.874807	0.00389695	0.748084	252	(0.01, 2.9, 0.1)	1	0	0.662213	higher
51	receptor similarity	AD-realted	Cluster3	clear	0.874807	0.00389695	0.748084	252	(0.01, 2.9, 0.1)	0	0	0.662213	higher
52	receptor similarity	AD-realted	Cluster3	mis	0.874807	0.00389695	0.748084	252	(0.01, 2.9, 0.1)	0	0	0.662213	higher
53	receptor similarity	AD-realted	Cluster3	spread	0.874807	0.00389695	0.748084	252	(0.01, 2.9, 0.1)	0	0	0.662213	higher
54	receptor similarity	AD-realted	Cluster3	syn	0.874807	0.00389695	0.748084	252	(0.01, 2.9, 0.1)	1	0	0.662213	higher
55	receptor similarity	AD-realted	Cluster2	clear	0.874807	0.00389695	0.748084	252	(0.01, 2.9, 0.1)	0	0	0.662213	higher
56	receptor similarity	AD-realted	Cluster2	spread	0.874807	0.00389695	0.748084	252	(0.01, 2.9, 0.1)	0	0	0.662213	higher
57	receptor similarity	AD-realted	Cluster2	syn	0.874807	0.00389695	0.748084	252	(0.01, 2.9, 0.1)	1	0	0.662213	higher
58	receptor similarity	AD-realted	Cluster2	mis	0.874807	0.00389695	0.748084	252	(0.01, 2.9, 0.1)	0	0	0.662213	higher
59	receptor similarity	AD-realted	Cluster7	syn	0.874807	0.00389695	0.748084	252	(0.01, 2.9, 0.1)	1	0	0.662213	higher
60	receptor similarity	AD-realted	Cluster7	spread	0.874807	0.00389695	0.748084	252	(0.01, 2.9, 0.1)	0	0	0.662213	higher
61	receptor similarity	AD-realted	Cluster7	mis	0.874807	0.00389695	0.748084	252	(0.01, 2.9, 0.1)	0	0	0.662213	higher
62	receptor similarity	AD-realted	Cluster7	clear	0.874807	0.00389695	0.748084	252	(0.01, 2.9, 0.1)	0	0	0.662213	higher
63	receptor similarity	Celltype	Oligo	syn	0.874521	0.00372578	0.736255	183	(0.01, 1, 1)	1	0	0.662213	higher
64	receptor similarity	Receptors	NMDA	syn	0.874349	0.00370261	0.7182	106	(0.01, 1.5, 1)	1	0	0.662213	higher
65	receptor similarity	Receptors	D2	mis	0.873789	0.00608032	0.747844	440	(0.5, 1.5, 0.1)	0	0	0.662213	higher
66	receptor similarity	Cortical expansion	evoexp	mis	0.873491	0.0056392	0.738915	57	(0.01, 2.9, 0.9)	0	0	0.662213	higher
67	receptor similarity	Celltype	Neuro-Ex	syn	0.87303	0.00387323	0.749926	118	(0.01, 2.5, 0.3)	1	0	0.662213	higher
68	receptor similarity	Celltype	Micro	syn	0.87291	0.00412168	0.752471	72	(0.01, 2, 1)	0	0	0.662213	higher
69	receptor similarity	Cortical expansion	devexp	syn	0.871593	0.00485726	0.734358	56	(0.01, 2.5, 1)	1	0	0.662213	higher
70	receptor similarity	Microstructure	thickness	mis	0.87145	0.00551146	0.742284	308	(0.1, 3, 0.1)	0	0	0.662213	higher
71	receptor similarity	Celltype	OPC	syn	0.870597	0.003581	0.740072	157	(0.3, 1, 1)	1	0	0.662213	higher
72	receptor similarity	Receptors	DAT	syn	0.870356	0.00367033	0.73249	156	(0.01, 0.9, 1)	1	0	0.662213	higher
73	receptor similarity	Receptors	5HT1a	spread	0.870257	0.00517745	0.748249	279	(0.01, 3, 0.1)	1	0	0.662213	higher
74	receptor similarity	Cortical expansion	scalingpnc	spread	0.870185	0.0055365	0.725912	295	(0.01, 2.5, 0.1)	0	0	0.662213	higher
75	receptor similarity	Celltype	Oligo	clear	0.870118	0.00555344	0.739076	261	(0.01, 0.5, 0.3)	0	0	0.662213	higher
76	receptor similarity	Microstructure	thickness	spread	0.869709	0.00530633	0.73829	253	(0.05, 3, 0.1)	0	0	0.662213	higher
77	receptor similarity	AD-realted	Abeta	syn	0.869673	0.00485414	0.716758	70	(0.01, 1.9, 1)	1	0	0.662213	higher
78	receptor similarity	Receptors	NMDA	clear	0.869554	0.00560201	0.733277	87	(0.01, 0.9, 1)	0	0	0.662213	higher
79	receptor similarity	Receptors	5HT1a	syn	0.869481	0.00332203	0.737967	205	(0.01, 0.9, 0.7)	0	0	0.662213	higher
80	receptor similarity	Cortical expansion	devexp	mis	0.868427	0.00545962	0.718833	80	(0.01, 2, 1)	0	0	0.662213	higher
81	receptor similarity	Receptors	D2	spread	0.867753	0.00591293	0.738026	260	(0.01, 2.9, 0.1)	0	0	0.662213	higher
82	receptor similarity	Celltype	Astro	syn	0.867543	0.00393917	0.739578	141	(0.01, 1.5, 0.5)	1	0	0.662213	higher
83	receptor similarity	Microstructure	myelinmap	spread	0.866878	0.0051577	0.74154	258	(0.1, 3, 0.1)	1	0	0.662213	higher
84	receptor similarity	Celltype	Neuro-In	syn	0.866414	0.00373036	0.729403	142	(0.01, 1.5, 0.5)	1	0	0.662213	higher
85	receptor similarity	metabolism	cbv	syn	0.866186	0.00450542	0.738527	63	(0.01, 2.5, 1)	0	0	0.662213	higher
86	receptor similarity	Microstructure	myelinmap	syn	0.864892	0.00530317	0.721946	53	(0.01, 3, 1)	0	0	0.662213	higher
87	receptor similarity	Cortical expansion	scalingnih	spread	0.863976	0.00594769	0.702685	306	(0.01, 2.5, 0.1)	0	0	0.662213	higher
88	receptor similarity	Receptors	VAChT	syn	0.863898	0.00463418	0.696144	107	(0.01, 1.5, 1)	0	0	0.662213	higher
89	receptor similarity	Celltype	Neuro-Ex	mis	0.863741	0.00563457	0.724329	88	(0.01, 2.5, 1)	0	0	0.662213	higher
90	receptor similarity	Celltype	Micro	mis	0.862837	0.00652701	0.713078	94	(0.01, 1.9, 1)	0	0	0.662213	higher
91	receptor similarity	Receptors	5HT1a	mis	0.862498	0.0053756	0.731352	899	(0.3, 1.5, 0.1)	0	0	0.662213	higher
92	receptor similarity	metabolism	cmrglc	clear	0.860851	0.00694092	0.736715	53	(0.01, 3, 1)	1	0	0.662213	higher
93	receptor similarity	Receptors	5HT2a	mis	0.860586	0.00522484	0.697258	77	(0.01, 2, 1)	0	0	0.662213	higher
94	receptor similarity	Celltype	Neuro-Ex	spread	0.860528	0.00546061	0.722234	127	(0.05, 3, 0.3)	0	0	0.662213	higher
95	receptor similarity	Receptors	D1	syn	0.860516	0.00511243	0.701431	89	(0.01, 1.5, 1)	1	0	0.662213	higher
96	receptor similarity	Receptors	5HT4	spread	0.860446	0.00600971	0.68461	251	(0.01, 2.9, 0.1)	0	0	0.662213	higher
97	receptor similarity	Receptors	M1	mis	0.860382	0.00590121	0.701234	75	(0.01, 2, 1)	0	0	0.662213	higher
98	receptor similarity	Microstructure	genepc1	syn	0.858901	0.00601056	0.674872	58	(0.01, 3, 1)	0	0	0.662213	higher
99	receptor similarity	metabolism	cbv	mis	0.857526	0.00714557	0.711231	66	(0.01, 3, 1)	0	0	0.662213	higher
100	receptor similarity	Receptors	5HT6	mis	0.857191	0.00650327	0.69569	52	(0.01, 3, 1)	0	0	0.662213	higher
101	receptor similarity	Celltype	Endo	clear	0.856846	0.00634992	0.700952	102	(0.1, 0.5, 1)	0	0	0.662213	higher
102	receptor similarity	Receptors	mGluR5	syn	0.855785	0.00585564	0.662383	74	(0.01, 2, 1)	1	0	0.662213	higher
103	receptor similarity	Celltype	Astro	spread	0.855746	0.00729413	0.717178	187	(0.7, 3, 0.1)	0	0	0.662213	higher
104	receptor similarity	Receptors	5HT1b	clear	0.855641	0.00533748	0.726698	221	(0.01, 3, 0.1)	1	0	0.662213	higher
105	receptor similarity	AD-realted	Abeta	mis	0.855612	0.00537035	0.689221	101	(0.01, 1.5, 1)	0	0	0.662213	higher
106	receptor similarity	metabolism	cmr02	clear	0.855309	0.00743049	0.715074	56	(0.01, 3, 1)	1	0	0.662213	higher
107	receptor similarity	Receptors	NET	spread	0.854669	0.00687305	0.688143	58	(0.01, 2.5, 1)	1	0	0.662213	higher
108	receptor similarity	metabolism	cmr02	syn	0.853627	0.00637895	0.647246	55	(0.01, 3, 1)	0	0	0.662213	higher
109	receptor similarity	Receptors	GABAa	clear	0.853605	0.00402689	0.726836	1045	(0.01, 0.5, 1)	1	0	0.662213	higher
110	receptor similarity	Celltype	Endo	mis	0.851861	0.00680294	0.682747	75	(0.01, 2.5, 1)	0	0	0.662213	higher
111	receptor similarity	Receptors	H3	syn	0.851634	0.00607066	0.655787	105	(0.01, 1.5, 1)	0	0	0.662213	higher
112	receptor similarity	Celltype	Astro	mis	0.85143	0.00703494	0.703365	82	(0.01, 1.9, 1)	0	0	0.662213	higher
113	receptor similarity	Celltype	OPC	spread	0.84964	0.00743115	0.710214	272	(0.9, 1.9, 0.1)	0	0	0.662213	higher
114	receptor similarity	Celltype	OPC	mis	0.848449	0.00714667	0.694794	84	(0.01, 1.9, 1)	0	0	0.662213	higher
115	receptor similarity	Receptors	GABAa	syn	0.848391	0.00615852	0.649557	55	(0.01, 3, 1)	0	0	0.662213	higher
116	receptor similarity	Receptors	DAT	clear	0.848057	0.008443	0.638562	30	(0.01, 3, 1)	0	0	0.662213	higher
117	receptor similarity	Receptors	D1	clear	0.847473	0.00882541	0.64246	82	(0.01, 1, 1)	0	0	0.662213	higher
118	receptor similarity	Cortical expansion	devexp	spread	0.846968	0.0062819	0.702759	266	(0.9, 2, 0.1)	0	0	0.662213	higher
119	receptor similarity	Celltype	Neuro-In	clear	0.846866	0.00813129	0.674918	59	(0.01, 0.9, 1)	0	0	0.662213	higher
120	receptor similarity	Receptors	5HT6	clear	0.846243	0.00453085	0.713042	13067	(0.01, 0.5, 1)	0	0	0.662213	higher
121	receptor similarity	Receptors	NET	syn	0.845875	0.00766188	0.627465	56	(0.01, 3, 1)	0	0	0.662213	higher
122	receptor similarity	AD-realted	APOE	clear	0.845686	0.00668592	0.689182	1690	(0.1, 0.1, 1)	1	0	0.662213	higher
123	receptor similarity	AD-realted	APOE	spread	0.845656	0.00573969	0.697685	249	(0.9, 1.9, 0.3)	0	0	0.662213	higher
124	receptor similarity	Receptors	NET	clear	0.845083	0.00670875	0.689895	1701	(0.1, 0.1, 1)	0	0	0.662213	higher
125	receptor similarity	AD-realted	APOE	syn	0.844421	0.00745748	0.622211	55	(0.01, 3, 1)	0	0	0.662213	higher
126	receptor similarity	Celltype	Neuro-Ex	clear	0.843877	0.00827469	0.666594	60	(0.01, 0.9, 1)	0	0	0.662213	higher
127	receptor similarity	Receptors	CB1	mis	0.843253	0.00676799	0.6536	92	(0.01, 1.5, 1)	0	0	0.662213	higher
128	receptor similarity	Cortical expansion	evoexp	spread	0.843039	0.00744413	0.648748	172	(0.3, 3, 0.1)	0	0	0.662213	higher
129	receptor similarity	Receptors	5HT6	spread	0.84303	0.00755604	0.663953	164	(0.3, 3, 0.1)	0	0	0.662213	higher
130	receptor similarity	Celltype	Neuro-In	mis	0.842091	0.00670159	0.671839	105	(0.01, 2, 1)	0	0	0.662213	higher
131	receptor similarity	metabolism	cmrglc	syn	0.841269	0.0071013	0.620248	53	(0.01, 3, 1)	0	0	0.662213	higher
132	receptor similarity	Microstructure	genepc1	clear	0.841089	0.00739438	0.664431	1784	(0.01, 0.1, 1)	0	0	0.662213	higher
133	receptor similarity	Celltype	Neuro-In	spread	0.840889	0.00621326	0.67521	262	(0.3, 2.5, 0.1)	0	0	0.662213	higher
134	receptor similarity	Receptors	DAT	spread	0.838835	0.00803575	0.666393	134	(0.7, 3, 0.3)	0	0	0.662213	higher
135	receptor similarity	Celltype	Endo	spread	0.838732	0.00789235	0.660736	205	(0.3, 2.9, 0.1)	0	0	0.662213	higher
136	receptor similarity	Microstructure	genepc1	mis	0.838625	0.00864112	0.652481	62	(0.01, 3, 1)	0	0	0.662213	higher
137	receptor similarity	Receptors	mGluR5	clear	0.838592	0.0081005	0.685766	731	(0.01, 0.5, 0.1)	0	0	0.662213	higher
138	receptor similarity	Receptors	5HT2a	clear	0.837927	0.00810627	0.67692	1349	(0.01, 0.1, 1)	0	0	0.662213	higher
139	receptor similarity	Receptors	M1	clear	0.837789	0.0081805	0.672984	1327	(0.01, 0.1, 1)	0	0	0.662213	higher
140	receptor similarity	Receptors	mGluR5	mis	0.836461	0.00732008	0.630649	100	(0.01, 1.5, 1)	0	0	0.662213	higher
141	receptor similarity	Microstructure	myelinmap	mis	0.836202	0.00887978	0.652536	57	(0.01, 2.9, 1)	0	0	0.662213	higher
142	receptor similarity	metabolism	cbf	syn	0.835822	0.0077726	0.608668	61	(0.01, 2.5, 1)	0	0	0.662213	higher
143	receptor similarity	Receptors	CB1	spread	0.835664	0.00808012	0.64036	184	(0.7, 2.9, 0.1)	0	0	0.662213	higher
144	receptor similarity	Cortical expansion	scalingpnc	clear	0.835378	0.00895053	0.660194	2467	(0.01, 0.1, 0.1)	0	0	0.662213	higher
145	receptor similarity	Cortical expansion	devexp	clear	0.835284	0.00882254	0.656701	8098	(0.01, 0.1, 0.1)	0	0	0.662213	higher
146	receptor similarity	Receptors	A4B2	syn	0.83513	0.00799642	0.614936	49	(0.01, 3, 1)	0	0	0.662213	higher
147	receptor similarity	AD-realted	Abeta	clear	0.834741	0.00915258	0.66084	1492	(0.01, 0.1, 0.1)	0	0	0.662213	higher
148	receptor similarity	Microstructure	myelinmap	clear	0.83416	0.00812039	0.653995	84	(0.01, 0.5, 1)	0	0	0.662213	higher
149	receptor similarity	Receptors	NET	mis	0.833723	0.00901817	0.624096	55	(0.01, 3, 1)	0	0	0.662213	higher
150	receptor similarity	Receptors	5HT1b	syn	0.83338	0.00808511	0.609164	53	(0.01, 3, 1)	0	0	0.662213	higher
151	receptor similarity	Receptors	M1	spread	0.833109	0.00820193	0.634034	155	(0.3, 3, 0.1)	0	0	0.662213	higher
152	receptor similarity	Receptors	NMDA	mis	0.832331	0.0079819	0.646581	76	(0.01, 1.9, 1)	0	0	0.662213	higher
153	receptor similarity	Receptors	MOR	mis	0.831662	0.007708	0.633761	150	(0.01, 1, 1)	0	0	0.662213	higher
154	receptor similarity	Receptors	DAT	mis	0.831428	0.0082889	0.650239	193	(0.01, 1, 1)	0	0	0.662213	higher
155	receptor similarity	AD-realted	Abeta	spread	0.830999	0.00767418	0.666965	149	(0.9, 3, 0.1)	0	0	0.662213	higher
156	receptor similarity	metabolism	cmr02	spread	0.830855	0.00742397	0.672242	165	(0.9, 2.9, 0.1)	0	0	0.662213	higher
157	receptor similarity	Receptors	D1	mis	0.830743	0.00801323	0.636777	166	(0.01, 1, 1)	0	0	0.662213	higher
158	receptor similarity	Receptors	D1	spread	0.830128	0.00816107	0.645297	179	(0.7, 3, 0.1)	0	0	0.662213	higher
159	receptor similarity	Receptors	5HTT	spread	0.829867	0.00840067	0.651147	195	(0.7, 2.9, 0.1)	0	0	0.662213	higher
160	receptor similarity	Cortical expansion	scaling	clear	0.829844	0.00965713	0.640882	1452	(0.01, 0.1, 0.1)	0	0	0.662213	higher
161	receptor similarity	Cortical expansion	evoexp	clear	0.829772	0.00971576	0.637717	1462	(0.01, 0.1, 0.1)	0	0	0.662213	higher
162	receptor similarity	Celltype	OPC	clear	0.829202	0.0081053	0.617581	134	(0.01, 0.5, 1)	0	0	0.662213	higher
163	receptor similarity	Receptors	GABAa	spread	0.829198	0.00785482	0.657237	155	(0.9, 3, 0.1)	0	0	0.662213	higher
164	receptor similarity	Cortical expansion	scalingnih	clear	0.828559	0.00989294	0.636723	1425	(0.01, 0.1, 0.1)	0	0	0.662213	higher
165	receptor similarity	metabolism	cmr02	mis	0.828198	0.0088119	0.613491	78	(0.01, 2, 1)	0	0	0.662213	higher
166	receptor similarity	Receptors	MOR	spread	0.828053	0.0079419	0.658428	149	(0.9, 3, 0.1)	0	0	0.662213	higher
167	receptor similarity	AD-realted	APOE	mis	0.828036	0.00942699	0.609434	66	(0.01, 2.5, 1)	0	0	0.662213	higher
168	receptor similarity	Receptors	5HT2a	spread	0.826972	0.00879869	0.587823	212	(0.7, 2.5, 0.1)	0	0	0.662213	higher
169	receptor similarity	Receptors	mGluR5	spread	0.826569	0.00785881	0.648977	152	(0.9, 3, 0.1)	0	0	0.662213	higher
170	receptor similarity	Celltype	Micro	clear	0.825654	0.010079	0.61963	7997	(0.01, 0.1, 0.1)	0	0	0.662213	higher
171	receptor similarity	Receptors	NMDA	spread	0.825612	0.0082603	0.651085	149	(0.9, 3, 0.1)	0	0	0.662213	higher
172	receptor similarity	Receptors	A4B2	spread	0.825502	0.00777947	0.656746	157	(0.9, 3, 0.1)	0	0	0.662213	higher
173	receptor similarity	Receptors	CB1	clear	0.82539	0.0103319	0.62168	1162	(0.01, 0.1, 0.1)	0	0	0.662213	higher
174	receptor similarity	Receptors	GABAa	mis	0.825327	0.00985454	0.612677	815	(0.01, 1, 0.1)	0	0	0.662213	higher
175	receptor similarity	Receptors	5HTT	mis	0.825316	0.00939523	0.626927	155	(0.01, 1, 1)	0	0	0.662213	higher
176	receptor similarity	metabolism	cbv	clear	0.82401	0.0101255	0.611832	9450	(0.01, 0.1, 0.1)	0	0	0.662213	higher
177	receptor similarity	Receptors	VAChT	mis	0.823905	0.00993712	0.619283	924	(0.01, 0.9, 0.1)	0	0	0.662213	higher
178	receptor similarity	metabolism	cmrglc	mis	0.823567	0.0101272	0.607992	840	(0.01, 0.9, 0.1)	0	0	0.662213	higher
179	receptor similarity	Receptors	A4B2	mis	0.823503	0.0100072	0.609439	802	(0.01, 0.9, 0.1)	0	0	0.662213	higher
180	receptor similarity	Cortical expansion	scalinghcp	clear	0.82333	0.0103036	0.61698	1207	(0.01, 0.1, 0.1)	0	0	0.662213	higher
181	receptor similarity	Receptors	MOR	clear	0.823132	0.0102701	0.617471	56	(0.01, 0.9, 1)	0	0	0.662213	higher
182	receptor similarity	Receptors	H3	mis	0.823055	0.0102821	0.610165	1361	(0.01, 0.5, 0.1)	0	0	0.662213	higher
183	receptor similarity	Receptors	5HT1b	mis	0.822818	0.0103588	0.607479	1188	(0.01, 0.5, 0.1)	0	0	0.662213	higher
184	receptor similarity	Celltype	Astro	clear	0.822645	0.00906033	0.601583	117	(0.01, 0.5, 1)	0	0	0.662213	higher
185	receptor similarity	metabolism	cbf	mis	0.822619	0.0103972	0.608693	1136	(0.01, 0.5, 0.1)	0	0	0.662213	higher
186	receptor similarity	Celltype	Oligo	mis	0.822472	0.0104234	0.609873	1457	(0.01, 0.5, 0.1)	0	0	0.662213	higher
187	receptor similarity	Receptors	5HT4	clear	0.820902	0.0107671	0.609325	1027	(0.01, 0.1, 0.1)	0	0	0.662213	higher
188	receptor similarity	Receptors	VAChT	spread	0.820434	0.00814275	0.646559	154	(0.9, 3, 0.1)	0	0	0.662213	higher
189	receptor similarity	metabolism	cmrglc	spread	0.816727	0.00695564	0.64845	165	(0.9, 3, 0.1)	0	0	0.662213	higher
190	receptor similarity	Receptors	H3	spread	0.814959	0.00823558	0.631104	153	(0.9, 3, 0.1)	0	0	0.662213	higher
191	receptor similarity	Receptors	D2	clear	0.811196	0.0115769	0.578137	940	(0.01, 0.1, 0.1)	0	0	0.662213	higher
192	receptor similarity	AD-realted	MAPT	clear	0.810389	0.0114214	0.574408	981	(0.01, 0.1, 0.1)	0	0	0.662213	higher
193	receptor similarity	metabolism	cbf	spread	0.808694	0.00720145	0.637458	165	(0.9, 3, 0.1)	0	0	0.662213	higher
194	receptor similarity	Microstructure	thickness	clear	0.807931	0.0118265	0.567548	883	(0.01, 0.1, 0.1)	0	0	0.662213	higher
195	receptor similarity	Celltype	Oligo	spread	0.806451	0.00841573	0.626825	162	(0.9, 3, 0.1)	0	0	0.662213	higher
196	receptor similarity	Receptors	5HT1a	clear	0.806208	0.0119438	0.562032	896	(0.01, 0.1, 0.1)	0	0	0.662213	higher
197	receptor similarity	Receptors	5HT1b	spread	0.800826	0.00889741	0.583248	156	(0.9, 3, 0.1)	0	0	0.662213	higher
1	laminar similarity	AD-realted	MAPT	spread	0.840696	0.00355562	0.644587	1430	(0.01, 1.5, 0.1)	1	0	0.654617	higher
2	laminar similarity	AD-realted	MAPT	mis	0.824477	0.00392742	0.665503	1658	(0.7, 1.5, 0.1)	0	0	0.654617	higher
3	laminar similarity	AD-realted	MAPT	syn	0.788954	0.00627349	0.553331	470	(0.01, 2.5, 0.1)	0	0	0.654617	higher
4	laminar similarity	Cortical expansion	scalingnih	syn	0.787567	0.00598108	0.556363	406	(0.7, 1, 0.1)	1	0	0.654617	higher
5	laminar similarity	Receptors	A4B2	clear	0.783823	0.0103734	0.553336	34	(0.9, 3, 0.1)	1	0	0.654617	higher
6	laminar similarity	Cortical expansion	scaling	syn	0.781297	0.00780096	0.411439	495	(0.7, 0.9, 0.1)	1	0	0.654617	higher
7	laminar similarity	Receptors	5HT4	syn	0.780522	0.00870961	0.492748	29999	(0.9, 0.5, 1)	1	0	0.654617	higher
8	laminar similarity	Receptors	5HT4	mis	0.779889	0.00901504	0.485204	1106	(0.9, 1, 0.1)	0	0	0.654617	higher
9	laminar similarity	Cortical expansion	scalinghcp	mis	0.77829	0.00648294	0.469032	748	(0.5, 1.5, 0.1)	1	0	0.654617	higher
10	laminar similarity	Cortical expansion	scalinghcp	spread	0.777883	0.00467743	0.514613	2383	(0.01, 0.9, 0.1)	0	0	0.654617	higher
11	laminar similarity	Cortical expansion	scalingnih	mis	0.776016	0.00805037	0.424116	468	(0.7, 1.5, 0.1)	0	0	0.654617	higher
12	laminar similarity	Cortical expansion	scaling	mis	0.775522	0.00869933	0.396885	29999	(0.7, 1, 1)	0	0	0.654617	higher
13	laminar similarity	Receptors	5HT1a	mis	0.770996	0.0106426	0.541954	152	(0.9, 3, 0.1)	1	0	0.654617	higher
14	laminar similarity	Receptors	5HT1b	clear	0.770522	0.0109154	0.571771	30	(0.9, 3, 0.1)	1	0	0.654617	higher
15	laminar similarity	Receptors	5HT1a	syn	0.76887	0.0105797	0.533953	78	(0.9, 3, 0.1)	0	0	0.654617	higher
16	laminar similarity	Receptors	5HT6	clear	0.760313	0.0126225	0.502159	40	(0.9, 1.5, 0.1)	1	0	0.654617	higher
17	laminar similarity	Celltype	Oligo	clear	0.75959	0.00919914	0.511373	1282	(0.7, 0.1, 0.3)	1	0	0.654617	higher
18	laminar similarity	AD-realted	APOE	syn	0.758678	0.00870858	0.431889	1409	(0.01, 0.9, 0.1)	1	0	0.654617	higher
19	laminar similarity	Receptors	M1	clear	0.756807	0.0127663	0.514419	23	(0.9, 3, 0.1)	1	0	0.654617	higher
20	laminar similarity	Receptors	H3	clear	0.755973	0.0071	0.476046	29999	(0.7, 0.1, 1)	1	0	0.654617	higher
21	laminar similarity	Cortical expansion	scalinghcp	syn	0.75571	0.00602831	0.515463	442	(0.7, 0.9, 0.1)	0	0	0.654617	higher
22	laminar similarity	Receptors	D2	syn	0.754375	0.0109718	0.462063	81	(0.9, 3, 0.1)	1	0	0.654617	higher
23	laminar similarity	Receptors	GABAa	clear	0.753954	0.0120142	0.508371	31	(0.9, 3, 0.1)	1	0	0.654617	higher
24	laminar similarity	Receptors	5HT1b	syn	0.752749	0.0117969	0.445599	299	(0.01, 0.1, 0.1)	0	0	0.654617	higher
25	laminar similarity	Receptors	A4B2	syn	0.752427	0.0110902	0.428987	2592	(0.01, 0.1, 0.3)	0	0	0.654617	higher
26	laminar similarity	Receptors	5HTT	clear	0.751388	0.00994932	0.467274	203	(0.7, 0.5, 0.1)	1	0	0.654617	higher
27	laminar similarity	metabolism	cbf	clear	0.751176	0.0110517	0.470297	53	(0.3, 3, 0.3)	1	0	0.654617	higher
28	laminar similarity	Receptors	NET	clear	0.751034	0.0119532	0.483134	40	(0.7, 3, 0.1)	1	0	0.654617	higher
29	laminar similarity	Receptors	VAChT	clear	0.750766	0.0109379	0.40863	308	(0.9, 0.1, 1)	1	0	0.654617	higher
30	laminar similarity	Receptors	H3	syn	0.749153	0.0107715	0.43634	6689	(0.01, 0.1, 0.1)	0	0	0.654617	higher
31	laminar similarity	Receptors	mGluR5	clear	0.74893	0.0126683	0.473201	29	(0.9, 3, 0.1)	1	0	0.654617	higher
32	laminar similarity	metabolism	cmr02	syn	0.748311	0.00845276	0.400047	1572	(0.01, 0.9, 0.1)	1	0	0.654617	higher
33	laminar similarity	Receptors	5HT1a	spread	0.747805	0.0113609	0.450548	48	(0.01, 0.5, 1)	0	0	0.654617	higher
34	laminar similarity	metabolism	cmrglc	clear	0.747306	0.0118297	0.465518	46	(0.3, 3, 0.3)	1	0	0.654617	higher
35	laminar similarity	Cortical expansion	evoexp	syn	0.747237	0.0121147	0.461631	193	(0.7, 0.1, 0.1)	1	0	0.654617	higher
36	laminar similarity	Celltype	Neuro-Ex	mis	0.746582	0.0103496	0.41372	1865	(0.9, 1, 0.1)	1	0	0.654617	higher
37	laminar similarity	Microstructure	genepc1	syn	0.746313	0.00831225	0.388066	1320	(0.01, 0.9, 0.1)	1	0	0.654617	higher
38	laminar similarity	Cortical expansion	evoexp	clear	0.746018	0.0124016	0.468414	154	(0.9, 0.1, 0.1)	0	0	0.654617	higher
39	laminar similarity	Celltype	Oligo	syn	0.745459	0.0121978	0.433861	2655	(0.9, 0.1, 0.1)	0	0	0.654617	higher
40	laminar similarity	Receptors	5HT2a	clear	0.744551	0.0130431	0.461052	30	(0.9, 1.5, 0.1)	1	0	0.654617	higher
41	laminar similarity	Receptors	D2	mis	0.744343	0.0111499	0.3908	401	(0.9, 0.9, 1)	0	0	0.654617	higher
42	laminar similarity	Microstructure	thickness	mis	0.743882	0.0113115	0.439974	154	(0.9, 3, 0.1)	1	0	0.654617	higher
43	laminar similarity	metabolism	cmrglc	syn	0.743371	0.012095	0.415716	260	(0.01, 0.1, 0.1)	0	0	0.654617	higher
44	laminar similarity	Receptors	NET	syn	0.7431	0.0120596	0.415306	292	(0.01, 0.1, 0.1)	0	0	0.654617	higher
45	laminar similarity	Microstructure	thickness	syn	0.742883	0.0114308	0.439434	77	(0.9, 3, 0.1)	0	0	0.654617	higher
46	laminar similarity	Receptors	M1	syn	0.742755	0.0123384	0.435963	142	(0.1, 0.1, 0.1)	0	0	0.654617	higher
47	laminar similarity	Receptors	NMDA	clear	0.742695	0.0085106	0.393406	1658	(0.7, 0.1, 0.1)	1	0	0.654617	higher
48	laminar similarity	AD-realted	APOE	clear	0.742234	0.0122142	0.443674	38	(0.5, 3, 0.3)	0	0	0.654617	higher
49	laminar similarity	Receptors	D2	spread	0.741841	0.0115662	0.42464	48	(0.01, 0.1, 1)	0	0	0.654617	higher
50	laminar similarity	Receptors	mGluR5	syn	0.741019	0.0120277	0.443377	182	(0.01, 0.1, 0.1)	0	0	0.654617	higher
51	laminar similarity	metabolism	cbf	syn	0.740693	0.0120222	0.400732	307	(0.01, 0.1, 0.1)	0	0	0.654617	higher
52	laminar similarity	Cortical expansion	scalingnih	spread	0.739492	0.0112536	0.408404	50	(0.01, 0.1, 1)	0	0	0.654617	higher
53	laminar similarity	Receptors	5HT6	syn	0.739435	0.0124078	0.410123	181	(0.01, 0.1, 0.1)	0	0	0.654617	higher
54	laminar similarity	Cortical expansion	scaling	spread	0.737591	0.011355	0.411915	43	(0.01, 0.1, 1)	0	0	0.654617	higher
55	laminar similarity	Receptors	GABAa	syn	0.737222	0.012563	0.401162	183	(0.01, 0.1, 0.1)	0	0	0.654617	higher
56	laminar similarity	Receptors	VAChT	syn	0.736617	0.0117612	0.413846	35	(0.01, 0.1, 0.7)	0	0	0.654617	higher
57	laminar similarity	Receptors	5HT2a	syn	0.736406	0.0127676	0.402387	125	(0.01, 0.1, 0.1)	0	0	0.654617	higher
58	laminar similarity	Receptors	DAT	spread	0.735553	0.0122789	0.402346	35	(0.01, 0.1, 1)	1	0	0.654617	higher
59	laminar similarity	Receptors	MOR	clear	0.734721	0.0096299	0.392086	3320	(0.5, 0.1, 0.1)	1	0	0.654617	higher
60	laminar similarity	Microstructure	thickness	spread	0.734179	0.0122899	0.401002	36	(0.01, 0.1, 1)	0	0	0.654617	higher
61	laminar similarity	Receptors	MOR	syn	0.733984	0.0120471	0.416669	23	(0.01, 0.1, 1)	0	0	0.654617	higher
62	laminar similarity	Celltype	Endo	syn	0.733414	0.00962493	0.378655	9673	(0.9, 0.5, 0.1)	1	0	0.654617	higher
63	laminar similarity	metabolism	cbv	clear	0.732381	0.0124723	0.384998	22	(0.01, 0.1, 1)	1	0	0.654617	higher
64	laminar similarity	Receptors	CB1	clear	0.732167	0.00930169	0.375775	6917	(0.5, 0.1, 0.1)	1	0	0.654617	higher
65	laminar similarity	Receptors	NMDA	syn	0.731676	0.0123694	0.391488	30	(0.01, 0.1, 0.7)	0	0	0.654617	higher
66	laminar similarity	metabolism	cbv	spread	0.73163	0.0122366	0.394475	36	(0.01, 0.1, 1)	0	0	0.654617	higher
67	laminar similarity	Receptors	DAT	clear	0.731586	0.0112165	0.36863	7517	(0.7, 0.1, 0.1)	0	0	0.654617	higher
68	laminar similarity	Receptors	CB1	syn	0.731502	0.0123767	0.377471	25	(0.01, 0.1, 1)	0	0	0.654617	higher
69	laminar similarity	Microstructure	thickness	clear	0.731231	0.0109268	0.369279	29999	(0.5, 0.1, 1)	0	0	0.654617	higher
70	laminar similarity	Receptors	DAT	syn	0.731078	0.0131055	0.311541	66	(0.9, 3, 0.3)	0	0	0.654617	higher
71	laminar similarity	Cortical expansion	devexp	syn	0.730985	0.0125638	0.404592	41	(0.01, 0.1, 0.3)	1	0	0.654617	higher
72	laminar similarity	AD-realted	MAPT	clear	0.730803	0.012736	0.37868	22	(0.01, 0.1, 1)	0	0	0.654617	higher
73	laminar similarity	Cortical expansion	scalinghcp	clear	0.730799	0.0126367	0.376009	20	(0.01, 0.1, 1)	0	0	0.654617	higher
74	laminar similarity	AD-realted	Abeta	syn	0.730538	0.0127753	0.372337	27	(0.01, 0.1, 1)	1	0	0.654617	higher
75	laminar similarity	metabolism	cmr02	clear	0.730162	0.0127544	0.393091	36	(0.3, 3, 0.7)	0	0	0.654617	higher
76	laminar similarity	Microstructure	genepc1	clear	0.729921	0.0123662	0.383478	20	(0.01, 0.1, 1)	0	0	0.654617	higher
77	laminar similarity	Celltype	Neuro-Ex	spread	0.729834	0.0126041	0.392677	123	(0.01, 0.9, 0.1)	0	0	0.654617	higher
78	laminar similarity	Microstructure	myelinmap	clear	0.729195	0.0125191	0.379391	20	(0.01, 0.1, 1)	1	0	0.654617	higher
79	laminar similarity	Celltype	OPC	syn	0.7291	0.012549	0.383837	20	(0.01, 0.1, 1)	1	0	0.654617	higher
80	laminar similarity	AD-realted	Abeta	clear	0.728627	0.0130009	0.396556	94	(0.5, 1.5, 0.1)	0	0	0.654617	higher
81	laminar similarity	Celltype	Neuro-In	spread	0.728541	0.0127532	0.381227	29	(0.01, 0.1, 1)	1	0	0.654617	higher
82	laminar similarity	Receptors	DAT	mis	0.728509	0.0128514	0.329855	22	(0.01, 2.9, 1)	0	0	0.654617	higher
83	laminar similarity	Cortical expansion	scaling	clear	0.727917	0.0126333	0.375108	19	(0.01, 0.1, 1)	0	0	0.654617	higher
84	laminar similarity	Cortical expansion	scalingnih	clear	0.7279	0.0126837	0.374154	19	(0.01, 0.1, 1)	0	0	0.654617	higher
85	laminar similarity	Celltype	Micro	syn	0.727283	0.0127524	0.376382	20	(0.01, 0.1, 0.9)	1	0	0.654617	higher
86	laminar similarity	Celltype	Neuro-Ex	clear	0.72719	0.0129096	0.373558	19	(0.01, 0.1, 1)	0	0	0.654617	higher
87	laminar similarity	Receptors	5HTT	syn	0.726773	0.0127274	0.377195	16	(0.01, 0.1, 1)	0	0	0.654617	higher
88	laminar similarity	Receptors	D1	syn	0.726722	0.0128033	0.381726	22	(0.01, 0.1, 1)	1	0	0.654617	higher
89	laminar similarity	Cortical expansion	scalingpnc	syn	0.726658	0.0133827	0.156904	29999	(0.9, 0.5, 1)	1	0	0.654617	higher
90	laminar similarity	Receptors	5HT1a	clear	0.726378	0.0131997	0.370671	18	(0.01, 0.1, 1)	0	0	0.654617	higher
91	laminar similarity	Receptors	D2	clear	0.726352	0.0131098	0.373565	18	(0.01, 0.1, 1)	0	0	0.654617	higher
92	laminar similarity	Celltype	Micro	clear	0.726348	0.0127241	0.378474	20	(0.01, 0.1, 1)	0	0	0.654617	higher
93	laminar similarity	Celltype	Neuro-In	clear	0.726299	0.0129923	0.371966	18	(0.01, 0.1, 1)	0	0	0.654617	higher
94	laminar similarity	Receptors	D1	spread	0.725992	0.0129623	0.36791	21	(0.01, 0.1, 1)	0	0	0.654617	higher
95	laminar similarity	Celltype	Astro	clear	0.725975	0.0129294	0.374088	19	(0.01, 0.1, 1)	1	0	0.654617	higher
96	laminar similarity	Celltype	Endo	clear	0.725768	0.0129033	0.372703	19	(0.01, 0.1, 1)	0	0	0.654617	higher
97	laminar similarity	Celltype	Neuro-In	mis	0.725747	0.0129524	0.372046	18	(0.01, 0.1, 1)	0	0	0.654617	higher
98	laminar similarity	Receptors	D1	mis	0.725727	0.0129083	0.366257	18	(0.01, 0.5, 1)	0	0	0.654617	higher
99	laminar similarity	Receptors	5HTT	spread	0.725724	0.0132256	0.370868	26	(0.01, 0.1, 1)	0	0	0.654617	higher
100	laminar similarity	Receptors	5HTT	mis	0.725693	0.0129617	0.372269	18	(0.01, 0.1, 1)	0	0	0.654617	higher
101	laminar similarity	Microstructure	genepc1	mis	0.725671	0.0129399	0.372354	18	(0.01, 0.1, 1)	0	0	0.654617	higher
102	laminar similarity	Microstructure	myelinmap	mis	0.725652	0.0129406	0.372578	18	(0.01, 0.1, 1)	0	0	0.654617	higher
103	laminar similarity	Cortical expansion	devexp	mis	0.725639	0.0129498	0.371153	18	(0.01, 0.1, 1)	0	0	0.654617	higher
104	laminar similarity	Celltype	Astro	mis	0.725638	0.0129482	0.372426	18	(0.01, 0.1, 1)	0	0	0.654617	higher
105	laminar similarity	AD-realted	Cluster1	clear	0.725629	0.0129435	0.372393	18	(0.01, 0.1, 1)	1	0	0.654617	higher
106	laminar similarity	AD-realted	Cluster1	syn	0.725629	0.0129435	0.372393	18	(0.01, 0.1, 1)	0	0	0.654617	higher
107	laminar similarity	AD-realted	Cluster4	clear	0.725629	0.0129435	0.372393	18	(0.01, 0.1, 1)	0	0	0.654617	higher
108	laminar similarity	AD-realted	Cluster7	mis	0.725629	0.0129435	0.372393	18	(0.01, 0.1, 1)	0	0	0.654617	higher
109	laminar similarity	AD-realted	Cluster7	spread	0.725629	0.0129435	0.372393	18	(0.01, 0.1, 1)	0	0	0.654617	higher
110	laminar similarity	AD-realted	Cluster7	syn	0.725629	0.0129435	0.372393	18	(0.01, 0.1, 1)	1	0	0.654617	higher
111	laminar similarity	AD-realted	Cluster6	clear	0.725629	0.0129435	0.372393	18	(0.01, 0.1, 1)	0	0	0.654617	higher
112	laminar similarity	AD-realted	Cluster6	mis	0.725629	0.0129435	0.372393	18	(0.01, 0.1, 1)	0	0	0.654617	higher
113	laminar similarity	AD-realted	Cluster6	spread	0.725629	0.0129435	0.372393	18	(0.01, 0.1, 1)	0	0	0.654617	higher
114	laminar similarity	AD-realted	Cluster6	syn	0.725629	0.0129435	0.372393	18	(0.01, 0.1, 1)	1	0	0.654617	higher
115	laminar similarity	AD-realted	Cluster5	clear	0.725629	0.0129435	0.372393	18	(0.01, 0.1, 1)	0	0	0.654617	higher
116	laminar similarity	AD-realted	Cluster5	mis	0.725629	0.0129435	0.372393	18	(0.01, 0.1, 1)	0	0	0.654617	higher
117	laminar similarity	AD-realted	Cluster5	spread	0.725629	0.0129435	0.372393	18	(0.01, 0.1, 1)	0	0	0.654617	higher
118	laminar similarity	AD-realted	Cluster5	syn	0.725629	0.0129435	0.372393	18	(0.01, 0.1, 1)	1	0	0.654617	higher
119	laminar similarity	AD-realted	Cluster4	mis	0.725629	0.0129435	0.372393	18	(0.01, 0.1, 1)	0	0	0.654617	higher
120	laminar similarity	AD-realted	Cluster1	spread	0.725629	0.0129435	0.372393	18	(0.01, 0.1, 1)	0	0	0.654617	higher
121	laminar similarity	AD-realted	Cluster4	spread	0.725629	0.0129435	0.372393	18	(0.01, 0.1, 1)	0	0	0.654617	higher
122	laminar similarity	AD-realted	Cluster4	syn	0.725629	0.0129435	0.372393	18	(0.01, 0.1, 1)	1	0	0.654617	higher
123	laminar similarity	AD-realted	Cluster3	clear	0.725629	0.0129435	0.372393	18	(0.01, 0.1, 1)	0	0	0.654617	higher
124	laminar similarity	AD-realted	Cluster3	mis	0.725629	0.0129435	0.372393	18	(0.01, 0.1, 1)	0	0	0.654617	higher
125	laminar similarity	AD-realted	Cluster3	spread	0.725629	0.0129435	0.372393	18	(0.01, 0.1, 1)	0	0	0.654617	higher
126	laminar similarity	AD-realted	Cluster3	syn	0.725629	0.0129435	0.372393	18	(0.01, 0.1, 1)	1	0	0.654617	higher
127	laminar similarity	AD-realted	Cluster2	clear	0.725629	0.0129435	0.372393	18	(0.01, 0.1, 1)	0	0	0.654617	higher
128	laminar similarity	AD-realted	Cluster2	mis	0.725629	0.0129435	0.372393	18	(0.01, 0.1, 1)	0	0	0.654617	higher
129	laminar similarity	AD-realted	Cluster2	spread	0.725629	0.0129435	0.372393	18	(0.01, 0.1, 1)	0	0	0.654617	higher
130	laminar similarity	AD-realted	Cluster2	syn	0.725629	0.0129435	0.372393	18	(0.01, 0.1, 1)	1	0	0.654617	higher
131	laminar similarity	AD-realted	Cluster1	mis	0.725629	0.0129435	0.372393	18	(0.01, 0.1, 1)	0	0	0.654617	higher
132	laminar similarity				0.725629	0.0129435	0.372393	18	(0.01, 0.1, 1)	0	1	0.654617	higher
133	laminar similarity	AD-realted	Cluster7	clear	0.725629	0.0129435	0.372393	18	(0.01, 0.1, 1)	0	0	0.654617	higher
134	laminar similarity	Receptors	CB1	mis	0.725612	0.0129638	0.367876	18	(0.01, 0.1, 1)	0	0	0.654617	higher
135	laminar similarity	Receptors	NMDA	mis	0.725605	0.0129534	0.370104	18	(0.01, 0.1, 1)	0	0	0.654617	higher
136	laminar similarity	Cortical expansion	scalingpnc	mis	0.725594	0.0129342	0.37346	18	(0.01, 0.1, 1)	0	0	0.654617	higher
137	laminar similarity	AD-realted	Abeta	mis	0.725585	0.0129359	0.371887	18	(0.01, 0.1, 1)	0	0	0.654617	higher
138	laminar similarity	Celltype	Endo	mis	0.725579	0.0129521	0.372657	18	(0.01, 0.1, 1)	0	0	0.654617	higher
139	laminar similarity	Receptors	MOR	mis	0.725572	0.0129626	0.369835	18	(0.01, 0.1, 1)	0	0	0.654617	higher
140	laminar similarity	Celltype	Micro	mis	0.725564	0.0129507	0.371908	18	(0.01, 0.1, 1)	0	0	0.654617	higher
141	laminar similarity	Receptors	VAChT	mis	0.725563	0.0129577	0.369846	18	(0.01, 0.1, 1)	0	0	0.654617	higher
142	laminar similarity	Celltype	OPC	mis	0.725562	0.0129516	0.371793	18	(0.01, 0.1, 1)	0	0	0.654617	higher
143	laminar similarity	Receptors	5HT2a	mis	0.725524	0.0129382	0.371721	18	(0.01, 0.1, 1)	0	0	0.654617	higher
144	laminar similarity	Receptors	mGluR5	mis	0.725516	0.0129439	0.371123	18	(0.01, 0.1, 1)	0	0	0.654617	higher
145	laminar similarity	Receptors	5HT6	mis	0.725511	0.0129384	0.37167	18	(0.01, 0.1, 1)	0	0	0.654617	higher
146	laminar similarity	Receptors	GABAa	mis	0.725507	0.0129401	0.371684	18	(0.01, 0.1, 1)	0	0	0.654617	higher
147	laminar similarity	Receptors	M1	mis	0.725499	0.012942	0.371462	18	(0.01, 0.1, 1)	0	0	0.654617	higher
148	laminar similarity	metabolism	cmr02	mis	0.725497	0.0129406	0.371668	18	(0.01, 0.1, 1)	0	0	0.654617	higher
149	laminar similarity	Celltype	Astro	syn	0.725489	0.0129665	0.366307	17	(0.01, 0.1, 1)	0	0	0.654617	higher
150	laminar similarity	Celltype	Oligo	mis	0.725473	0.012961	0.371335	18	(0.01, 0.1, 1)	0	0	0.654617	higher
151	laminar similarity	Cortical expansion	evoexp	mis	0.725441	0.0129529	0.370959	18	(0.01, 0.1, 1)	0	0	0.654617	higher
152	laminar similarity	Receptors	H3	mis	0.725436	0.0129426	0.371679	18	(0.01, 0.1, 1)	0	0	0.654617	higher
153	laminar similarity	AD-realted	APOE	mis	0.725422	0.012942	0.371534	18	(0.01, 0.1, 1)	0	0	0.654617	higher
154	laminar similarity	metabolism	cbf	mis	0.725414	0.01294	0.371649	18	(0.01, 0.1, 1)	0	0	0.654617	higher
155	laminar similarity	Receptors	NET	mis	0.725388	0.0129424	0.371387	18	(0.01, 0.1, 1)	0	0	0.654617	higher
156	laminar similarity	Receptors	5HT1b	mis	0.725373	0.0129431	0.371404	18	(0.01, 0.1, 1)	0	0	0.654617	higher
157	laminar similarity	metabolism	cmrglc	mis	0.725364	0.0129423	0.371423	18	(0.01, 0.1, 1)	0	0	0.654617	higher
158	laminar similarity	Receptors	A4B2	mis	0.725329	0.0130537	0.369815	17	(0.01, 0.1, 1)	0	0	0.654617	higher
159	laminar similarity	Microstructure	myelinmap	syn	0.72522	0.00741536	0.3435	1380	(0.01, 0.9, 0.1)	0	0	0.654617	higher
160	laminar similarity	Cortical expansion	scalingpnc	clear	0.725013	0.012992	0.338933	18	(0.01, 0.5, 1)	0	0	0.654617	higher
161	laminar similarity	Celltype	OPC	clear	0.724801	0.0128682	0.382051	23	(0.01, 1.5, 0.5)	0	0	0.654617	higher
162	laminar similarity	Receptors	D1	clear	0.724531	0.0100307	0.331831	2404	(0.7, 0.1, 0.1)	0	0	0.654617	higher
163	laminar similarity	Celltype	Neuro-In	syn	0.72448	0.0130468	0.37268	16	(0.01, 0.1, 1)	0	0	0.654617	higher
164	laminar similarity	metabolism	cbv	mis	0.724236	0.0131888	0.35955	81	(0.5, 1, 0.1)	0	0	0.654617	higher
165	laminar similarity	Receptors	5HT4	clear	0.723636	0.0131799	0.371647	16	(0.01, 0.1, 1)	0	0	0.654617	higher
166	laminar similarity	Receptors	5HT4	spread	0.723635	0.0132493	0.349025	23	(0.01, 0.1, 1)	0	0	0.654617	higher
167	laminar similarity	Celltype	Astro	spread	0.723495	0.0133816	0.364935	19	(0.01, 0.1, 1)	0	0	0.654617	higher
168	laminar similarity	Microstructure	myelinmap	spread	0.723036	0.01331	0.363735	20	(0.01, 0.1, 1)	0	0	0.654617	higher
169	laminar similarity	Cortical expansion	devexp	clear	0.722837	0.0130944	0.368569	15	(0.01, 0.1, 1)	0	0	0.654617	higher
170	laminar similarity	Celltype	Neuro-Ex	syn	0.722685	0.0132881	0.366367	14	(0.01, 0.1, 1)	0	0	0.654617	higher
171	laminar similarity	Microstructure	genepc1	spread	0.722657	0.013388	0.361463	20	(0.01, 0.1, 1)	0	0	0.654617	higher
172	laminar similarity	metabolism	cbv	syn	0.720864	0.0131661	0.325323	28	(0.5, 3, 1)	0	0	0.654617	higher
173	laminar similarity	Celltype	Endo	spread	0.720217	0.0139177	0.350807	18	(0.01, 0.1, 0.7)	0	0	0.654617	higher
174	laminar similarity	Cortical expansion	scalingpnc	spread	0.719938	0.0138322	0.347827	15	(0.01, 0.1, 1)	0	0	0.654617	higher
175	laminar similarity	Celltype	OPC	spread	0.719777	0.013915	0.347839	16	(0.01, 0.1, 0.7)	0	0	0.654617	higher
176	laminar similarity	Celltype	Micro	spread	0.719481	0.0140752	0.346044	17	(0.01, 0.1, 0.5)	0	0	0.654617	higher
177	laminar similarity	Receptors	CB1	spread	0.71935	0.0142955	0.342535	24	(0.01, 0.1, 0.1)	0	0	0.654617	higher
178	laminar similarity	Receptors	NMDA	spread	0.719324	0.0144688	0.348489	58	(0.9, 0.1, 0.1)	0	0	0.654617	higher
179	laminar similarity	Cortical expansion	devexp	spread	0.719321	0.0143926	0.342737	25	(0.01, 0.1, 0.1)	0	0	0.654617	higher
180	laminar similarity	Receptors	MOR	spread	0.719298	0.0144706	0.348461	56	(0.9, 0.1, 0.1)	0	0	0.654617	higher
181	laminar similarity	AD-realted	Abeta	spread	0.719247	0.0140266	0.342692	14	(0.01, 0.1, 0.7)	0	0	0.654617	higher
182	laminar similarity	Receptors	VAChT	spread	0.719175	0.0145082	0.348103	48	(0.9, 0.1, 0.1)	0	0	0.654617	higher
183	laminar similarity	Receptors	5HT6	spread	0.719058	0.0145208	0.347842	42	(0.9, 0.1, 0.1)	0	0	0.654617	higher
184	laminar similarity	Receptors	5HT2a	spread	0.719036	0.0145242	0.347666	42	(0.9, 0.1, 0.1)	0	0	0.654617	higher
185	laminar similarity	metabolism	cmr02	spread	0.719	0.0145346	0.347667	40	(0.9, 0.1, 0.1)	0	0	0.654617	higher
186	laminar similarity	Celltype	Oligo	spread	0.718999	0.0145381	0.347715	41	(0.9, 0.1, 0.1)	0	0	0.654617	higher
187	laminar similarity	Receptors	mGluR5	spread	0.718982	0.0145362	0.347473	40	(0.9, 0.1, 0.1)	0	0	0.654617	higher
188	laminar similarity	Receptors	GABAa	spread	0.718979	0.0145361	0.347519	40	(0.9, 0.1, 0.1)	0	0	0.654617	higher
189	laminar similarity	Receptors	M1	spread	0.718978	0.0145365	0.347514	39	(0.9, 0.1, 0.1)	0	0	0.654617	higher
190	laminar similarity	Receptors	H3	spread	0.718907	0.0145429	0.347415	37	(0.9, 0.1, 0.1)	0	0	0.654617	higher
191	laminar similarity	Cortical expansion	evoexp	spread	0.718883	0.0145436	0.347228	37	(0.9, 0.1, 0.1)	0	0	0.654617	higher
192	laminar similarity	metabolism	cbf	spread	0.718844	0.0145514	0.347189	35	(0.9, 0.1, 0.1)	0	0	0.654617	higher
193	laminar similarity	AD-realted	APOE	spread	0.718809	0.0145563	0.347051	35	(0.9, 0.1, 0.1)	0	0	0.654617	higher
194	laminar similarity	Receptors	NET	spread	0.718753	0.014563	0.346862	33	(0.9, 0.1, 0.1)	0	0	0.654617	higher
195	laminar similarity	Receptors	A4B2	spread	0.718711	0.0145607	0.346807	32	(0.9, 0.1, 0.1)	0	0	0.654617	higher
196	laminar similarity	metabolism	cmrglc	spread	0.718705	0.0145676	0.346689	32	(0.9, 0.1, 0.1)	0	0	0.654617	higher
197	laminar similarity	Receptors	5HT1b	spread	0.718693	0.0145695	0.346617	32	(0.9, 0.1, 0.1)	0	0	0.654617	higher
1	metabolic covariance	AD-realted	MAPT	spread	0.831679	0.00455046	0.646374	617	(0.01, 0.9, 0.5)	1	0	0.666498	higher
2	metabolic covariance	Receptors	5HT1b	clear	0.824416	0.00621892	0.679658	44	(0.9, 3, 0.1)	1	0	0.666498	higher
3	metabolic covariance	Receptors	GABAa	clear	0.818079	0.00782837	0.638158	58	(0.5, 3, 0.3)	1	0	0.666498	higher
4	metabolic covariance	Receptors	5HT1a	spread	0.815549	0.0061519	0.627646	256	(0.1, 0.9, 0.9)	1	0	0.666498	higher
5	metabolic covariance	Receptors	5HT1a	mis	0.812004	0.00781395	0.641371	213	(0.9, 2.5, 0.1)	0	0	0.666498	higher
6	metabolic covariance	metabolism	cmrglc	clear	0.811656	0.0077653	0.607777	45	(0.1, 3, 1)	1	0	0.666498	higher
7	metabolic covariance	Microstructure	thickness	spread	0.810073	0.00682942	0.615726	203	(0.5, 0.9, 1)	1	0	0.666498	higher
8	metabolic covariance	Microstructure	thickness	mis	0.80562	0.00768859	0.610969	147	(0.9, 3, 0.3)	0	0	0.666498	higher
9	metabolic covariance	Receptors	5HT1a	syn	0.805586	0.00807594	0.610638	85	(0.9, 3, 0.1)	0	0	0.666498	higher
10	metabolic covariance	Cortical expansion	scalinghcp	spread	0.805305	0.00495392	0.624808	2437	(0.01, 0.5, 0.3)	1	0	0.666498	higher
11	metabolic covariance	Microstructure	thickness	syn	0.801031	0.00778544	0.586963	87	(0.9, 3, 0.1)	0	0	0.666498	higher
12	metabolic covariance	Receptors	NET	clear	0.800623	0.00837825	0.560193	123	(0.05, 3, 0.1)	1	0	0.666498	higher
13	metabolic covariance	AD-realted	MAPT	mis	0.800024	0.00630757	0.589594	1120	(0.7, 1, 0.1)	0	0	0.666498	higher
14	metabolic covariance	Receptors	D2	syn	0.798213	0.00889238	0.558089	82	(0.9, 3, 0.1)	1	0	0.666498	higher
15	metabolic covariance	Receptors	D2	spread	0.796763	0.00738492	0.579339	931	(0.5, 0.9, 0.1)	0	0	0.666498	higher
16	metabolic covariance	metabolism	cbf	clear	0.79567	0.00780199	0.606786	40	(0.5, 3, 0.7)	1	0	0.666498	higher
17	metabolic covariance	AD-realted	APOE	clear	0.794659	0.00870975	0.542644	46	(0.05, 3, 1)	1	0	0.666498	higher
18	metabolic covariance	metabolism	cmr02	clear	0.7944	0.00783871	0.527349	51	(0.05, 3, 1)	1	0	0.666498	higher
19	metabolic covariance	AD-realted	MAPT	syn	0.794225	0.00754924	0.587412	103	(0.7, 3, 0.1)	0	0	0.666498	higher
20	metabolic covariance	Receptors	D2	mis	0.79258	0.00875168	0.53254	324	(0.9, 0.9, 1)	0	0	0.666498	higher
21	metabolic covariance	Receptors	5HT4	spread	0.792063	0.00666964	0.511716	13775	(0.3, 0.5, 1)	1	0	0.666498	higher
22	metabolic covariance	Receptors	NMDA	clear	0.791197	0.00670812	0.50986	67	(0.01, 0.9, 0.9)	1	0	0.666498	higher
23	metabolic covariance	Cortical expansion	scalinghcp	mis	0.790479	0.00680112	0.564731	302	(0.5, 1, 0.7)	0	0	0.666498	higher
24	metabolic covariance	Receptors	NMDA	syn	0.788528	0.0067248	0.513954	1161	(0.01, 0.9, 0.1)	0	0	0.666498	higher
25	metabolic covariance	Cortical expansion	scaling	mis	0.786916	0.00713868	0.556806	255	(0.5, 1, 1)	1	0	0.666498	higher
26	metabolic covariance	Receptors	M1	clear	0.784716	0.0076409	0.550072	474	(0.7, 0.1, 0.1)	1	0	0.666498	higher
27	metabolic covariance	Receptors	5HTT	clear	0.784223	0.00747439	0.529732	124	(0.3, 0.5, 0.7)	1	0	0.666498	higher
28	metabolic covariance	Receptors	5HT6	clear	0.783768	0.00662291	0.541794	286	(0.01, 0.9, 0.1)	1	0	0.666498	higher
29	metabolic covariance	Receptors	5HT4	mis	0.782895	0.00795768	0.470989	866	(0.7, 1, 0.1)	0	0	0.666498	higher
30	metabolic covariance	Cortical expansion	scalingnih	mis	0.781183	0.0077737	0.507206	599	(0.7, 1, 0.3)	1	0	0.666498	higher
31	metabolic covariance	Receptors	MOR	spread	0.781176	0.00844226	0.52439	203	(0.9, 1.9, 0.3)	1	0	0.666498	higher
32	metabolic covariance	Receptors	5HT2a	clear	0.78035	0.00722328	0.536537	282	(0.01, 0.9, 0.1)	1	0	0.666498	higher
33	metabolic covariance	Celltype	Endo	clear	0.780077	0.00762361	0.515705	276	(0.3, 0.5, 0.1)	1	0	0.666498	higher
34	metabolic covariance	Cortical expansion	evoexp	mis	0.779214	0.00781707	0.501097	164	(0.5, 1.5, 0.3)	1	0	0.666498	higher
35	metabolic covariance	AD-realted	Abeta	spread	0.778796	0.0085889	0.523273	236	(0.9, 1.9, 0.1)	1	0	0.666498	higher
36	metabolic covariance	Receptors	5HT1b	syn	0.777933	0.00859993	0.450189	154	(0.01, 0.9, 1)	0	0	0.666498	higher
37	metabolic covariance	Cortical expansion	scaling	spread	0.776794	0.00831562	0.540186	351	(0.5, 1, 0.1)	0	0	0.666498	higher
38	metabolic covariance	Receptors	GABAa	syn	0.776675	0.00767376	0.468067	318	(0.01, 0.9, 0.5)	0	0	0.666498	higher
39	metabolic covariance	Cortical expansion	devexp	mis	0.776651	0.00770772	0.506857	163	(0.1, 1.5, 0.5)	1	0	0.666498	higher
40	metabolic covariance	AD-realted	Abeta	mis	0.776438	0.00690733	0.49016	187	(0.5, 1, 1)	0	0	0.666498	higher
41	metabolic covariance	Cortical expansion	scalingpnc	mis	0.775987	0.00679524	0.536162	152	(0.3, 1.5, 0.5)	1	0	0.666498	higher
42	metabolic covariance	Receptors	5HT6	syn	0.775619	0.0068956	0.4964	183	(0.01, 0.9, 1)	0	0	0.666498	higher
43	metabolic covariance	Cortical expansion	evoexp	syn	0.775592	0.00809154	0.515289	88	(0.3, 3, 0.1)	0	0	0.666498	higher
44	metabolic covariance	Receptors	CB1	spread	0.7755	0.0090083	0.511109	182	(0.9, 2, 0.3)	1	0	0.666498	higher
45	metabolic covariance	Cortical expansion	devexp	syn	0.773881	0.00844184	0.509466	202	(0.5, 1.5, 0.1)	0	0	0.666498	higher
46	metabolic covariance	Celltype	Endo	syn	0.773852	0.00756641	0.489965	11967	(0.3, 0.5, 0.1)	0	0	0.666498	higher
47	metabolic covariance	Receptors	M1	syn	0.773579	0.00871073	0.490424	1002	(0.01, 1, 0.1)	0	0	0.666498	higher
48	metabolic covariance	Receptors	NET	syn	0.772955	0.00795474	0.450603	174	(0.01, 0.9, 1)	0	0	0.666498	higher
49	metabolic covariance	Receptors	5HT2a	syn	0.772332	0.0082606	0.471788	208	(0.01, 2.5, 0.1)	0	0	0.666498	higher
50	metabolic covariance	Cortical expansion	evoexp	spread	0.772311	0.00942639	0.478981	194	(0.9, 1.9, 0.3)	0	0	0.666498	higher
51	metabolic covariance	Celltype	Neuro-Ex	mis	0.772305	0.00663523	0.50868	308	(0.7, 1.9, 0.1)	1	0	0.666498	higher
52	metabolic covariance	Receptors	DAT	syn	0.772146	0.00860473	0.492454	57	(0.5, 3, 1)	1	0	0.666498	higher
53	metabolic covariance	Cortical expansion	scaling	syn	0.771938	0.00924191	0.521735	110	(0.9, 1, 1)	0	0	0.666498	higher
54	metabolic covariance	metabolism	cbf	syn	0.771599	0.00826617	0.441002	148	(0.01, 0.9, 1)	0	0	0.666498	higher
55	metabolic covariance	Cortical expansion	scalingnih	syn	0.770501	0.00844826	0.456673	231	(0.7, 1, 0.1)	0	0	0.666498	higher
56	metabolic covariance	Celltype	Neuro-Ex	syn	0.770479	0.00686737	0.495194	232	(0.9, 0.9, 1)	0	0	0.666498	higher
57	metabolic covariance	metabolism	cmrglc	syn	0.770479	0.00829787	0.438581	142	(0.01, 0.9, 1)	0	0	0.666498	higher
58	metabolic covariance	AD-realted	Abeta	syn	0.769702	0.00826759	0.513441	35	(0.3, 3, 0.9)	0	0	0.666498	higher
59	metabolic covariance	Receptors	A4B2	clear	0.769006	0.009601	0.481039	53	(0.3, 3, 0.3)	1	0	0.666498	higher
60	metabolic covariance	Cortical expansion	devexp	spread	0.768855	0.00889288	0.508457	160	(0.1, 2.9, 0.1)	0	0	0.666498	higher
61	metabolic covariance	Cortical expansion	scalingnih	spread	0.768759	0.00857478	0.519887	374	(0.7, 0.9, 0.1)	0	0	0.666498	higher
62	metabolic covariance	Receptors	5HTT	syn	0.768443	0.00640735	0.528523	13058	(0.1, 0.5, 0.1)	0	0	0.666498	higher
63	metabolic covariance	Cortical expansion	scalingpnc	spread	0.768372	0.0093098	0.484733	176	(0.9, 2, 0.3)	0	0	0.666498	higher
64	metabolic covariance	Cortical expansion	scalinghcp	syn	0.768208	0.00798593	0.515983	127	(0.7, 1, 0.3)	0	0	0.666498	higher
65	metabolic covariance	Receptors	H3	syn	0.767912	0.00792725	0.456546	160	(0.01, 0.9, 1)	1	0	0.666498	higher
66	metabolic covariance	Cortical expansion	scalingpnc	syn	0.767132	0.00836329	0.440738	118	(0.5, 1.5, 0.3)	0	0	0.666498	higher
67	metabolic covariance	Celltype	Astro	spread	0.766476	0.00834469	0.515484	569	(0.7, 0.9, 0.1)	1	0	0.666498	higher
68	metabolic covariance	metabolism	cmr02	syn	0.766023	0.00764817	0.437704	149	(0.01, 0.9, 0.9)	0	0	0.666498	higher
69	metabolic covariance	Receptors	5HT4	syn	0.766022	0.00873027	0.450644	31	(0.1, 3, 1)	0	0	0.666498	higher
70	metabolic covariance	Receptors	VAChT	clear	0.764777	0.00752411	0.47622	438	(0.7, 0.1, 0.9)	1	0	0.666498	higher
71	metabolic covariance	AD-realted	APOE	syn	0.763638	0.00833549	0.423768	188	(0.01, 0.9, 0.7)	0	0	0.666498	higher
72	metabolic covariance	Celltype	Oligo	clear	0.762353	0.00720842	0.479164	397	(0.05, 0.5, 0.1)	1	0	0.666498	higher
73	metabolic covariance	Celltype	Oligo	syn	0.761364	0.00729628	0.483824	2692	(0.1, 0.5, 0.9)	0	0	0.666498	higher
74	metabolic covariance	Celltype	OPC	spread	0.761183	0.00858561	0.504079	438	(0.7, 1, 0.1)	1	0	0.666498	higher
75	metabolic covariance	Receptors	A4B2	syn	0.761088	0.00938247	0.407456	110	(0.01, 1, 1)	0	0	0.666498	higher
76	metabolic covariance	Celltype	OPC	mis	0.761002	0.00746003	0.458937	157	(0.3, 1, 1)	0	0	0.666498	higher
77	metabolic covariance	Celltype	Astro	mis	0.760785	0.0075361	0.469433	134	(0.3, 1, 1)	0	0	0.666498	higher
78	metabolic covariance	Celltype	Micro	spread	0.760781	0.00791636	0.48189	428	(0.7, 1, 0.1)	1	0	0.666498	higher
79	metabolic covariance	Receptors	H3	clear	0.76067	0.0080731	0.480355	150	(0.1, 1, 0.1)	0	0	0.666498	higher
80	metabolic covariance	Microstructure	genepc1	clear	0.760558	0.00843939	0.466422	51	(0.01, 0.9, 1)	1	0	0.666498	higher
81	metabolic covariance	Receptors	mGluR5	syn	0.759651	0.00783623	0.46151	113	(0.01, 1, 0.9)	1	0	0.666498	higher
82	metabolic covariance	Receptors	D1	syn	0.759553	0.00770872	0.460181	312	(0.01, 0.9, 0.3)	1	0	0.666498	higher
83	metabolic covariance	Receptors	CB1	syn	0.759377	0.00862387	0.447347	31	(0.01, 3, 1)	0	0	0.666498	higher
84	metabolic covariance	Receptors	VAChT	syn	0.759029	0.00737275	0.466159	246	(0.01, 0.9, 0.5)	0	0	0.666498	higher
85	metabolic covariance	Receptors	CB1	mis	0.758902	0.00821697	0.379288	80	(0.01, 1.5, 0.9)	0	0	0.666498	higher
86	metabolic covariance	Receptors	MOR	mis	0.758373	0.00828988	0.392079	85	(0.01, 1.5, 1)	0	0	0.666498	higher
87	metabolic covariance	Receptors	DAT	spread	0.757928	0.00946964	0.410504	155	(0.7, 3, 0.1)	0	0	0.666498	higher
88	metabolic covariance	Receptors	D1	clear	0.757571	0.00851327	0.437027	121	(0.01, 0.5, 1)	0	0	0.666498	higher
89	metabolic covariance	Celltype	Micro	syn	0.757195	0.00850383	0.444266	36	(0.3, 3, 1)	0	0	0.666498	higher
90	metabolic covariance	AD-realted	Cluster7	mis	0.757151	0.00770553	0.473387	403	(0.7, 0.9, 0.1)	0	0	0.666498	higher
91	metabolic covariance	AD-realted	Cluster6	syn	0.757151	0.00770553	0.473387	403	(0.7, 0.9, 0.1)	1	0	0.666498	higher
92	metabolic covariance	AD-realted	Cluster7	spread	0.757151	0.00770553	0.473387	403	(0.7, 0.9, 0.1)	0	0	0.666498	higher
93	metabolic covariance	AD-realted	Cluster6	spread	0.757151	0.00770553	0.473387	403	(0.7, 0.9, 0.1)	0	0	0.666498	higher
94	metabolic covariance	AD-realted	Cluster6	mis	0.757151	0.00770553	0.473387	403	(0.7, 0.9, 0.1)	0	0	0.666498	higher
95	metabolic covariance	AD-realted	Cluster7	syn	0.757151	0.00770553	0.473387	403	(0.7, 0.9, 0.1)	1	0	0.666498	higher
96	metabolic covariance	AD-realted	Cluster6	clear	0.757151	0.00770553	0.473387	403	(0.7, 0.9, 0.1)	0	0	0.666498	higher
97	metabolic covariance	AD-realted	Cluster3	spread	0.757151	0.00770553	0.473387	403	(0.7, 0.9, 0.1)	0	0	0.666498	higher
98	metabolic covariance	AD-realted	Cluster5	mis	0.757151	0.00770553	0.473387	403	(0.7, 0.9, 0.1)	0	0	0.666498	higher
99	metabolic covariance	AD-realted	Cluster5	spread	0.757151	0.00770553	0.473387	403	(0.7, 0.9, 0.1)	0	0	0.666498	higher
100	metabolic covariance	AD-realted	Cluster5	syn	0.757151	0.00770553	0.473387	403	(0.7, 0.9, 0.1)	1	0	0.666498	higher
101	metabolic covariance	AD-realted	Cluster3	clear	0.757151	0.00770553	0.473387	403	(0.7, 0.9, 0.1)	0	0	0.666498	higher
102	metabolic covariance	AD-realted	Cluster3	mis	0.757151	0.00770553	0.473387	403	(0.7, 0.9, 0.1)	0	0	0.666498	higher
103	metabolic covariance	AD-realted	Cluster3	syn	0.757151	0.00770553	0.473387	403	(0.7, 0.9, 0.1)	1	0	0.666498	higher
104	metabolic covariance	AD-realted	Cluster2	mis	0.757151	0.00770553	0.473387	403	(0.7, 0.9, 0.1)	1	0	0.666498	higher
105	metabolic covariance	AD-realted	Cluster1	clear	0.757151	0.00770553	0.473387	403	(0.7, 0.9, 0.1)	0	0	0.666498	higher
106	metabolic covariance	AD-realted	Cluster1	syn	0.757151	0.00770553	0.473387	403	(0.7, 0.9, 0.1)	1	0	0.666498	higher
107	metabolic covariance				0.757151	0.00770553	0.473387	403	(0.7, 0.9, 0.1)	0	1	0.666498	higher
108	metabolic covariance	AD-realted	Cluster7	clear	0.757151	0.00770553	0.473387	403	(0.7, 0.9, 0.1)	0	0	0.666498	higher
109	metabolic covariance	AD-realted	Cluster2	syn	0.757151	0.00770553	0.473387	403	(0.7, 0.9, 0.1)	0	0	0.666498	higher
110	metabolic covariance	AD-realted	Cluster4	spread	0.757151	0.00770553	0.473387	403	(0.7, 0.9, 0.1)	0	0	0.666498	higher
111	metabolic covariance	AD-realted	Cluster5	clear	0.757151	0.00770553	0.473387	403	(0.7, 0.9, 0.1)	0	0	0.666498	higher
112	metabolic covariance	AD-realted	Cluster1	spread	0.757151	0.00770553	0.473387	403	(0.7, 0.9, 0.1)	0	0	0.666498	higher
113	metabolic covariance	AD-realted	Cluster1	mis	0.757151	0.00770553	0.473387	403	(0.7, 0.9, 0.1)	0	0	0.666498	higher
114	metabolic covariance	AD-realted	Cluster2	spread	0.757151	0.00770553	0.473387	403	(0.7, 0.9, 0.1)	0	0	0.666498	higher
115	metabolic covariance	AD-realted	Cluster2	clear	0.757151	0.00770553	0.473387	403	(0.7, 0.9, 0.1)	0	0	0.666498	higher
116	metabolic covariance	AD-realted	Cluster4	syn	0.757151	0.00770553	0.473387	403	(0.7, 0.9, 0.1)	1	0	0.666498	higher
117	metabolic covariance	AD-realted	Cluster4	clear	0.757151	0.00770553	0.473387	403	(0.7, 0.9, 0.1)	0	0	0.666498	higher
118	metabolic covariance	AD-realted	Cluster4	mis	0.757151	0.00770553	0.473387	403	(0.7, 0.9, 0.1)	0	0	0.666498	higher
119	metabolic covariance	Celltype	Neuro-Ex	spread	0.756885	0.00863006	0.449993	493	(0.9, 0.9, 0.1)	0	0	0.666498	higher
120	metabolic covariance	Celltype	OPC	syn	0.756803	0.00872	0.45434	32	(0.1, 3, 1)	0	0	0.666498	higher
121	metabolic covariance	Receptors	MOR	syn	0.756605	0.00844332	0.453538	33	(0.05, 3, 1)	0	0	0.666498	higher
122	metabolic covariance	Receptors	DAT	mis	0.756123	0.00858554	0.425557	45	(0.1, 3, 1)	0	0	0.666498	higher
123	metabolic covariance	Celltype	Micro	mis	0.75608	0.00757403	0.436534	359	(0.05, 2, 0.1)	0	0	0.666498	higher
124	metabolic covariance	Microstructure	myelinmap	syn	0.755241	0.00776176	0.403413	78	(0.01, 0.9, 1)	1	0	0.666498	higher
125	metabolic covariance	Microstructure	myelinmap	clear	0.755182	0.00816947	0.42234	70	(0.01, 0.5, 1)	0	0	0.666498	higher
126	metabolic covariance	Celltype	Neuro-In	clear	0.755098	0.00837834	0.423948	44	(0.01, 0.9, 1)	1	0	0.666498	higher
127	metabolic covariance	Celltype	Neuro-In	syn	0.755076	0.00758578	0.458383	349	(0.5, 0.9, 0.1)	0	0	0.666498	higher
128	metabolic covariance	Receptors	mGluR5	clear	0.754464	0.00722277	0.455162	314	(0.5, 0.1, 0.5)	0	0	0.666498	higher
129	metabolic covariance	Celltype	Astro	syn	0.754354	0.00884249	0.439643	31	(0.05, 3, 1)	0	0	0.666498	higher
130	metabolic covariance	Microstructure	genepc1	syn	0.753744	0.00804635	0.378241	98	(0.01, 0.9, 1)	0	0	0.666498	higher
131	metabolic covariance	metabolism	cbv	syn	0.752572	0.00755401	0.434164	60	(0.01, 0.9, 1)	1	0	0.666498	higher
132	metabolic covariance	Celltype	Neuro-Ex	clear	0.749829	0.00843002	0.397393	71	(0.01, 0.5, 1)	0	0	0.666498	higher
133	metabolic covariance	Receptors	DAT	clear	0.748931	0.00950011	0.411416	54	(0.01, 0.9, 1)	0	0	0.666498	higher
134	metabolic covariance	metabolism	cbv	clear	0.748438	0.009734	0.403866	820	(0.01, 0.1, 0.1)	0	0	0.666498	higher
135	metabolic covariance	Receptors	5HT2a	mis	0.748319	0.00987589	0.432764	603	(0.9, 1, 0.1)	0	0	0.666498	higher
136	metabolic covariance	Celltype	Neuro-In	mis	0.748207	0.00827371	0.415865	516	(0.01, 1.5, 0.1)	0	0	0.666498	higher
137	metabolic covariance	Receptors	D1	mis	0.74794	0.00873511	0.394722	1189	(0.01, 0.5, 0.1)	0	0	0.666498	higher
138	metabolic covariance	metabolism	cbv	mis	0.747383	0.00934255	0.392737	6243	(0.01, 0.1, 0.1)	0	0	0.666498	higher
139	metabolic covariance	Receptors	M1	mis	0.747316	0.00936239	0.391874	6283	(0.01, 0.1, 0.1)	0	0	0.666498	higher
140	metabolic covariance	Celltype	Micro	clear	0.747286	0.00908024	0.39564	972	(0.01, 0.1, 0.1)	0	0	0.666498	higher
141	metabolic covariance	Receptors	VAChT	mis	0.747244	0.00944489	0.389288	6219	(0.01, 0.1, 0.1)	0	0	0.666498	higher
142	metabolic covariance	Receptors	mGluR5	mis	0.747203	0.00903875	0.389943	1404	(0.01, 0.5, 0.1)	0	0	0.666498	higher
143	metabolic covariance	Receptors	5HTT	mis	0.747189	0.0093942	0.392401	6229	(0.01, 0.1, 0.1)	0	0	0.666498	higher
144	metabolic covariance	Receptors	A4B2	mis	0.747158	0.00947627	0.390992	2003	(0.01, 0.1, 0.1)	0	0	0.666498	higher
145	metabolic covariance	Celltype	Endo	mis	0.747149	0.0094118	0.392494	6237	(0.01, 0.1, 0.1)	0	0	0.666498	higher
146	metabolic covariance	Celltype	Oligo	mis	0.747133	0.00943507	0.391334	5991	(0.01, 0.1, 0.1)	0	0	0.666498	higher
147	metabolic covariance	Receptors	H3	mis	0.7471	0.00945086	0.39089	2163	(0.01, 0.1, 0.1)	0	0	0.666498	higher
148	metabolic covariance	Microstructure	myelinmap	mis	0.747079	0.00936918	0.392448	6249	(0.01, 0.1, 0.1)	0	0	0.666498	higher
149	metabolic covariance	Receptors	5HT6	mis	0.747062	0.00939543	0.39159	2729	(0.01, 0.1, 0.1)	0	0	0.666498	higher
150	metabolic covariance	Microstructure	genepc1	mis	0.746911	0.00937316	0.391545	6232	(0.01, 0.1, 0.1)	0	0	0.666498	higher
151	metabolic covariance	Receptors	NMDA	mis	0.746898	0.0093756	0.389697	3056	(0.01, 0.1, 0.1)	0	0	0.666498	higher
152	metabolic covariance	Receptors	NET	mis	0.74685	0.00942306	0.390195	2068	(0.01, 0.1, 0.1)	0	0	0.666498	higher
153	metabolic covariance	AD-realted	APOE	mis	0.746586	0.00939626	0.390024	2196	(0.01, 0.1, 0.1)	0	0	0.666498	higher
154	metabolic covariance	metabolism	cmr02	mis	0.746493	0.0094106	0.390279	1968	(0.01, 0.1, 0.1)	0	0	0.666498	higher
155	metabolic covariance	metabolism	cmrglc	mis	0.746423	0.00944126	0.389791	1764	(0.01, 0.1, 0.1)	0	0	0.666498	higher
156	metabolic covariance	Receptors	GABAa	mis	0.746379	0.00938839	0.389693	1875	(0.01, 0.1, 0.1)	0	0	0.666498	higher
157	metabolic covariance	Cortical expansion	devexp	clear	0.746183	0.0085666	0.399142	345	(0.01, 0.1, 0.1)	0	0	0.666498	higher
158	metabolic covariance	Receptors	5HT1b	mis	0.746182	0.00944966	0.388943	1584	(0.01, 0.1, 0.1)	0	0	0.666498	higher
159	metabolic covariance	metabolism	cbf	mis	0.746163	0.00944513	0.389178	1598	(0.01, 0.1, 0.1)	0	0	0.666498	higher
160	metabolic covariance	Receptors	D1	spread	0.745728	0.00990195	0.354227	151	(0.7, 3, 0.1)	0	0	0.666498	higher
161	metabolic covariance	Cortical expansion	scalingnih	clear	0.745547	0.00910195	0.364778	599	(0.01, 0.1, 0.1)	0	0	0.666498	higher
162	metabolic covariance	Cortical expansion	scalingpnc	clear	0.745273	0.0088591	0.379648	345	(0.01, 0.1, 0.1)	0	0	0.666498	higher
163	metabolic covariance	Celltype	Neuro-In	spread	0.745264	0.0100302	0.374455	318	(0.9, 1.5, 0.1)	0	0	0.666498	higher
164	metabolic covariance	Celltype	OPC	clear	0.745046	0.00922478	0.384197	1016	(0.01, 0.1, 0.1)	0	0	0.666498	higher
165	metabolic covariance	Cortical expansion	evoexp	clear	0.745041	0.00879864	0.383787	404	(0.01, 0.1, 0.1)	0	0	0.666498	higher
166	metabolic covariance	Celltype	Astro	clear	0.74462	0.00944362	0.381531	1000	(0.01, 0.1, 0.1)	0	0	0.666498	higher
167	metabolic covariance	Cortical expansion	scaling	clear	0.744463	0.00909761	0.364709	470	(0.01, 0.1, 0.1)	0	0	0.666498	higher
168	metabolic covariance	AD-realted	Abeta	clear	0.744146	0.0089679	0.392031	255	(0.01, 0.1, 0.1)	0	0	0.666498	higher
169	metabolic covariance	Receptors	CB1	clear	0.743784	0.0089094	0.389866	409	(0.01, 0.1, 0.1)	0	0	0.666498	higher
170	metabolic covariance	Receptors	5HT4	clear	0.743415	0.00933329	0.379083	587	(0.01, 0.1, 0.1)	0	0	0.666498	higher
171	metabolic covariance	Receptors	MOR	clear	0.743385	0.00909326	0.372009	541	(0.01, 0.1, 0.1)	0	0	0.666498	higher
172	metabolic covariance	Cortical expansion	scalinghcp	clear	0.743216	0.00947843	0.360071	606	(0.01, 0.1, 0.1)	0	0	0.666498	higher
173	metabolic covariance	Receptors	D2	clear	0.741259	0.0100891	0.362503	813	(0.01, 0.1, 0.1)	0	0	0.666498	higher
174	metabolic covariance	Receptors	5HT1a	clear	0.738615	0.0104711	0.349428	833	(0.01, 0.1, 0.1)	0	0	0.666498	higher
175	metabolic covariance	AD-realted	MAPT	clear	0.73838	0.0104581	0.351158	561	(0.01, 0.1, 0.1)	0	0	0.666498	higher
176	metabolic covariance	Microstructure	thickness	clear	0.738368	0.0101943	0.346076	704	(0.01, 0.1, 0.1)	0	0	0.666498	higher
177	metabolic covariance	Receptors	VAChT	spread	0.735531	0.00961284	0.30389	174	(0.7, 2.9, 0.1)	0	0	0.666498	higher
178	metabolic covariance	Receptors	mGluR5	spread	0.734487	0.0102398	0.304895	157	(0.7, 3, 0.1)	0	0	0.666498	higher
179	metabolic covariance	Receptors	H3	spread	0.730078	0.0102819	0.294408	164	(0.7, 3, 0.1)	0	0	0.666498	higher
180	metabolic covariance	Receptors	5HT2a	spread	0.729754	0.0110627	0.288128	143	(0.7, 3, 0.1)	0	0	0.666498	higher
181	metabolic covariance	metabolism	cbv	spread	0.726875	0.0110633	0.345172	217	(0.9, 1.9, 0.1)	0	0	0.666498	higher
182	metabolic covariance	Receptors	A4B2	spread	0.725105	0.0103793	0.276688	165	(0.7, 3, 0.1)	0	0	0.666498	higher
183	metabolic covariance	Receptors	5HTT	spread	0.722426	0.0107757	0.26348	156	(0.7, 3, 0.1)	0	0	0.666498	higher
184	metabolic covariance	Receptors	M1	spread	0.719017	0.0116783	0.3059	213	(0.9, 1.9, 0.1)	0	0	0.666498	higher
185	metabolic covariance	Receptors	5HT6	spread	0.715126	0.0118902	0.297339	213	(0.9, 1.9, 0.1)	0	0	0.666498	higher
186	metabolic covariance	Microstructure	myelinmap	spread	0.715025	0.0116583	0.302524	216	(0.9, 1.9, 0.1)	0	0	0.666498	higher
187	metabolic covariance	Receptors	NMDA	spread	0.714445	0.0113693	0.236728	145	(0.7, 3, 0.1)	0	0	0.666498	higher
188	metabolic covariance	Celltype	Endo	spread	0.711346	0.0121474	0.295688	221	(0.9, 1.9, 0.1)	0	0	0.666498	higher
189	metabolic covariance	Celltype	Oligo	spread	0.710392	0.0119954	0.197298	153	(0.7, 3, 0.1)	0	0	0.666498	higher
190	metabolic covariance	Microstructure	genepc1	spread	0.705041	0.0127277	0.287663	150	(0.9, 2.5, 0.1)	0	0	0.666498	higher
191	metabolic covariance	Receptors	NET	spread	0.699861	0.0120935	0.161028	150	(0.7, 3, 0.1)	0	0	0.666498	higher
192	metabolic covariance	metabolism	cmr02	spread	0.697087	0.0140667	0.252311	139	(0.9, 2.5, 0.1)	0	0	0.666498	higher
193	metabolic covariance	AD-realted	APOE	spread	0.697023	0.0153185	0.277715	66	(0.9, 0.1, 0.1)	0	0	0.666498	higher
194	metabolic covariance	metabolism	cmrglc	spread	0.696816	0.0153977	0.277311	48	(0.9, 0.1, 0.1)	0	0	0.666498	higher
195	metabolic covariance	metabolism	cbf	spread	0.696651	0.0154304	0.276866	40	(0.9, 0.1, 0.1)	0	0	0.666498	higher
196	metabolic covariance	Receptors	5HT1b	spread	0.69656	0.0154489	0.276578	37	(0.9, 0.1, 0.1)	0	0	0.666498	higher
197	metabolic covariance	Receptors	GABAa	spread	0.696114	0.0142474	0.247843	136	(0.9, 2.5, 0.1)	0	0	0.666498	higher
1	electrophysiological	Receptors	5HT1b	clear	0.868093	0.0038816	0.749994	31	(0.9, 3, 0.9)	1	0	0.698678	higher
2	electrophysiological	metabolism	cmrglc	clear	0.863562	0.00450739	0.727955	38	(0.7, 3, 1)	1	0	0.698678	higher
3	electrophysiological	AD-realted	APOE	clear	0.856404	0.00494882	0.71026	44	(0.7, 3, 0.5)	1	0	0.698678	higher
4	electrophysiological	metabolism	cmr02	clear	0.855718	0.00465132	0.701086	54	(0.7, 3, 0.3)	1	0	0.698678	higher
5	electrophysiological	Receptors	5HT1a	mis	0.841129	0.00641714	0.674964	276	(0.9, 2, 0.1)	1	0	0.698678	higher
6	electrophysiological	Receptors	NET	clear	0.837745	0.00518617	0.638901	60	(0.9, 1, 1)	1	0	0.698678	higher
7	electrophysiological	Receptors	5HT1a	syn	0.83753	0.00560871	0.657391	304	(0.9, 1, 0.1)	0	0	0.698678	higher
8	electrophysiological	metabolism	cbf	clear	0.834089	0.00512182	0.674985	57	(0.7, 3, 0.1)	1	0	0.698678	higher
9	electrophysiological	Receptors	GABAa	clear	0.834088	0.0053084	0.65791	31	(0.9, 3, 1)	1	0	0.698678	higher
10	electrophysiological	Receptors	5HT1a	spread	0.82899	0.00377104	0.613329	3762	(0.3, 0.5, 1)	0	0	0.698678	higher
11	electrophysiological	AD-realted	MAPT	spread	0.823377	0.0036353	0.545511	7845	(0.01, 0.5, 0.3)	1	0	0.698678	higher
12	electrophysiological	Microstructure	thickness	spread	0.821466	0.00375338	0.592041	29999	(0.3, 0.5, 1)	1	0	0.698678	higher
13	electrophysiological	Receptors	M1	clear	0.819426	0.00543074	0.58483	520	(0.7, 0.1, 0.1)	1	0	0.698678	higher
14	electrophysiological	Receptors	5HT2a	clear	0.818895	0.00532923	0.57283	222	(0.01, 1, 0.1)	1	0	0.698678	higher
15	electrophysiological	Cortical expansion	scalinghcp	spread	0.815394	0.0042145	0.554595	867	(0.01, 0.5, 0.1)	1	0	0.698678	higher
16	electrophysiological	Microstructure	thickness	mis	0.811095	0.00491974	0.555001	50	(0.01, 2.5, 1)	0	0	0.698678	higher
17	electrophysiological	AD-realted	MAPT	syn	0.809198	0.00525231	0.582052	86	(0.9, 3, 0.1)	0	0	0.698678	higher
18	electrophysiological	Microstructure	thickness	syn	0.807921	0.00609745	0.5981	75	(0.9, 3, 0.3)	0	0	0.698678	higher
19	electrophysiological	Receptors	D2	spread	0.805839	0.00451943	0.554972	3672	(0.3, 0.5, 0.3)	1	0	0.698678	higher
20	electrophysiological	Receptors	D2	mis	0.801481	0.00617815	0.559013	36	(0.01, 2.9, 1)	0	0	0.698678	higher
21	electrophysiological	Receptors	MOR	spread	0.799112	0.004032	0.504153	13554	(0.3, 0.5, 0.5)	1	0	0.698678	higher
22	electrophysiological	Microstructure	genepc1	clear	0.797084	0.00659693	0.562828	41	(0.7, 3, 1)	1	0	0.698678	higher
23	electrophysiological	AD-realted	MAPT	mis	0.796501	0.00449521	0.500642	58	(0.01, 1.5, 1)	0	0	0.698678	higher
24	electrophysiological	Celltype	Oligo	clear	0.796155	0.00579403	0.51869	36	(0.01, 0.9, 1)	1	0	0.698678	higher
25	electrophysiological	Cortical expansion	scaling	spread	0.794365	0.00471294	0.517945	2564	(0.5, 0.1, 0.1)	1	0	0.698678	higher
26	electrophysiological	Celltype	Oligo	syn	0.793658	0.00552708	0.511311	316	(0.01, 0.5, 0.1)	0	0	0.698678	higher
27	electrophysiological	Microstructure	myelinmap	clear	0.792525	0.00458212	0.475208	791	(0.3, 0.5, 0.1)	1	0	0.698678	higher
28	electrophysiological	Celltype	Endo	clear	0.79186	0.00572944	0.491143	231	(0.01, 0.9, 0.1)	1	0	0.698678	higher
29	electrophysiological	Celltype	Astro	spread	0.791426	0.00602208	0.507242	76	(0.05, 1, 1)	1	0	0.698678	higher
30	electrophysiological	Celltype	Astro	mis	0.790632	0.00582306	0.510453	237	(0.01, 2.5, 0.1)	0	0	0.698678	higher
31	electrophysiological	Celltype	OPC	syn	0.790489	0.00583339	0.50031	201	(0.7, 1, 0.1)	1	0	0.698678	higher
32	electrophysiological	Receptors	MOR	mis	0.790013	0.00477735	0.438402	467	(0.1, 2, 0.1)	0	0	0.698678	higher
33	electrophysiological	Celltype	Endo	syn	0.789277	0.00533496	0.459211	278	(0.01, 0.9, 0.1)	0	0	0.698678	higher
34	electrophysiological	Celltype	OPC	mis	0.789128	0.00592092	0.500793	203	(0.01, 2.9, 0.1)	0	0	0.698678	higher
35	electrophysiological	Receptors	CB1	mis	0.789085	0.00529643	0.391234	353	(0.1, 2, 0.1)	1	0	0.698678	higher
36	electrophysiological	AD-realted	Abeta	spread	0.789078	0.00582405	0.520039	217	(0.9, 0.1, 1)	1	0	0.698678	higher
37	electrophysiological	Receptors	5HTT	syn	0.788942	0.00514948	0.48158	240	(0.01, 0.5, 0.1)	1	0	0.698678	higher
38	electrophysiological	Receptors	NMDA	syn	0.785206	0.00632944	0.424709	600	(0.01, 0.5, 0.1)	1	0	0.698678	higher
39	electrophysiological	Receptors	D2	syn	0.784795	0.00599719	0.473997	297	(0.9, 0.5, 1)	0	0	0.698678	higher
40	electrophysiological	Celltype	Astro	syn	0.784068	0.00609597	0.453466	100	(0.1, 2.9, 0.1)	0	0	0.698678	higher
41	electrophysiological	Cortical expansion	scalingnih	spread	0.783831	0.00528848	0.48911	355	(0.5, 0.1, 1)	1	0	0.698678	higher
42	electrophysiological	Cortical expansion	scalinghcp	mis	0.78378	0.00508886	0.441446	67	(0.1, 1, 1)	0	0	0.698678	higher
43	electrophysiological	Receptors	5HT1b	syn	0.782842	0.00670092	0.3503	5252	(0.01, 0.5, 0.1)	0	0	0.698678	higher
44	electrophysiological	Receptors	DAT	syn	0.782599	0.00631508	0.403053	1376	(0.9, 0.5, 0.3)	1	0	0.698678	higher
45	electrophysiological	Receptors	DAT	mis	0.782424	0.00685164	0.460828	42	(0.01, 3, 1)	0	0	0.698678	higher
46	electrophysiological	Cortical expansion	scalingnih	mis	0.780877	0.00524526	0.417903	323	(0.01, 1.5, 0.1)	0	0	0.698678	higher
47	electrophysiological	Receptors	5HT6	clear	0.780361	0.0059382	0.449452	518	(0.5, 0.1, 0.1)	1	0	0.698678	higher
48	electrophysiological	Cortical expansion	scaling	mis	0.780333	0.00538998	0.428823	293	(0.01, 1.5, 0.1)	0	0	0.698678	higher
49	electrophysiological	AD-realted	Abeta	mis	0.78031	0.00541727	0.423772	472	(0.01, 1, 0.1)	0	0	0.698678	higher
50	electrophysiological	Receptors	H3	clear	0.780156	0.00581006	0.447789	195	(0.01, 0.5, 0.1)	1	0	0.698678	higher
51	electrophysiological	Receptors	A4B2	clear	0.779623	0.00592955	0.457464	192	(0.01, 0.5, 0.1)	1	0	0.698678	higher
52	electrophysiological	Receptors	mGluR5	clear	0.779549	0.00647123	0.436702	217	(0.01, 0.5, 0.1)	1	0	0.698678	higher
53	electrophysiological	Receptors	5HT4	mis	0.777472	0.00576573	0.391472	498	(0.01, 0.9, 0.1)	1	0	0.698678	higher
54	electrophysiological	Receptors	NMDA	clear	0.776515	0.00630145	0.411379	224	(0.01, 0.5, 0.1)	0	0	0.698678	higher
55	electrophysiological	Receptors	CB1	spread	0.776396	0.00599827	0.463499	1558	(0.5, 0.5, 0.1)	0	0	0.698678	higher
56	electrophysiological	Celltype	OPC	spread	0.776369	0.00615361	0.456952	842	(0.01, 0.9, 0.1)	0	0	0.698678	higher
57	electrophysiological	Receptors	M1	syn	0.775941	0.00703045	0.372817	449	(0.01, 0.9, 0.1)	0	0	0.698678	higher
58	electrophysiological	Receptors	VAChT	syn	0.775821	0.00686357	0.396597	301	(0.01, 0.9, 0.1)	1	0	0.698678	higher
59	electrophysiological	Receptors	VAChT	clear	0.775643	0.00621401	0.415994	214	(0.01, 0.5, 0.1)	0	0	0.698678	higher
60	electrophysiological	Cortical expansion	devexp	mis	0.775597	0.00592602	0.401723	462	(0.01, 1, 0.1)	1	0	0.698678	higher
61	electrophysiological	Receptors	5HT4	spread	0.774078	0.00559641	0.449014	1988	(0.05, 0.5, 0.1)	0	0	0.698678	higher
62	electrophysiological	Celltype	Neuro-Ex	clear	0.773614	0.00677104	0.438139	47	(0.01, 0.9, 1)	1	0	0.698678	higher
63	electrophysiological	metabolism	cmrglc	syn	0.773525	0.00697099	0.331099	2369	(0.01, 0.5, 0.1)	0	0	0.698678	higher
64	electrophysiological	Cortical expansion	scalingpnc	mis	0.773458	0.0057421	0.421267	400	(0.01, 1, 0.1)	1	0	0.698678	higher
65	electrophysiological	Celltype	Micro	mis	0.773219	0.00597027	0.419255	270	(0.01, 1.9, 0.1)	1	0	0.698678	higher
66	electrophysiological	Cortical expansion	scalingpnc	clear	0.773118	0.00680103	0.410101	390	(0.01, 0.1, 0.1)	0	0	0.698678	higher
67	electrophysiological	AD-realted	Cluster6	spread	0.772958	0.00616869	0.419891	269	(0.01, 1, 0.1)	1	0	0.698678	higher
68	electrophysiological	AD-realted	Cluster6	mis	0.772958	0.00616869	0.419891	269	(0.01, 1, 0.1)	0	0	0.698678	higher
69	electrophysiological	AD-realted	Cluster7	syn	0.772958	0.00616869	0.419891	269	(0.01, 1, 0.1)	1	0	0.698678	higher
70	electrophysiological	AD-realted	Cluster7	spread	0.772958	0.00616869	0.419891	269	(0.01, 1, 0.1)	0	0	0.698678	higher
71	electrophysiological	AD-realted	Cluster7	clear	0.772958	0.00616869	0.419891	269	(0.01, 1, 0.1)	0	0	0.698678	higher
72	electrophysiological	AD-realted	Cluster3	spread	0.772958	0.00616869	0.419891	269	(0.01, 1, 0.1)	0	0	0.698678	higher
73	electrophysiological	AD-realted	Cluster4	clear	0.772958	0.00616869	0.419891	269	(0.01, 1, 0.1)	1	0	0.698678	higher
74	electrophysiological	AD-realted	Cluster3	clear	0.772958	0.00616869	0.419891	269	(0.01, 1, 0.1)	0	0	0.698678	higher
75	electrophysiological	AD-realted	Cluster3	mis	0.772958	0.00616869	0.419891	269	(0.01, 1, 0.1)	0	0	0.698678	higher
76	electrophysiological	AD-realted	Cluster3	syn	0.772958	0.00616869	0.419891	269	(0.01, 1, 0.1)	1	0	0.698678	higher
77	electrophysiological	AD-realted	Cluster6	clear	0.772958	0.00616869	0.419891	269	(0.01, 1, 0.1)	0	0	0.698678	higher
78	electrophysiological	AD-realted	Cluster7	mis	0.772958	0.00616869	0.419891	269	(0.01, 1, 0.1)	0	0	0.698678	higher
79	electrophysiological	AD-realted	Cluster2	spread	0.772958	0.00616869	0.419891	269	(0.01, 1, 0.1)	0	0	0.698678	higher
80	electrophysiological	AD-realted	Cluster2	mis	0.772958	0.00616869	0.419891	269	(0.01, 1, 0.1)	0	0	0.698678	higher
81	electrophysiological	AD-realted	Cluster1	clear	0.772958	0.00616869	0.419891	269	(0.01, 1, 0.1)	0	0	0.698678	higher
82	electrophysiological	AD-realted	Cluster1	mis	0.772958	0.00616869	0.419891	269	(0.01, 1, 0.1)	0	0	0.698678	higher
83	electrophysiological	AD-realted	Cluster1	spread	0.772958	0.00616869	0.419891	269	(0.01, 1, 0.1)	0	0	0.698678	higher
84	electrophysiological	AD-realted	Cluster1	syn	0.772958	0.00616869	0.419891	269	(0.01, 1, 0.1)	1	0	0.698678	higher
85	electrophysiological	AD-realted	Cluster5	clear	0.772958	0.00616869	0.419891	269	(0.01, 1, 0.1)	0	0	0.698678	higher
86	electrophysiological	AD-realted	Cluster2	clear	0.772958	0.00616869	0.419891	269	(0.01, 1, 0.1)	0	0	0.698678	higher
87	electrophysiological	AD-realted	Cluster5	mis	0.772958	0.00616869	0.419891	269	(0.01, 1, 0.1)	0	0	0.698678	higher
88	electrophysiological	AD-realted	Cluster6	syn	0.772958	0.00616869	0.419891	269	(0.01, 1, 0.1)	0	0	0.698678	higher
89	electrophysiological	AD-realted	Cluster4	syn	0.772958	0.00616869	0.419891	269	(0.01, 1, 0.1)	0	0	0.698678	higher
90	electrophysiological	AD-realted	Cluster4	spread	0.772958	0.00616869	0.419891	269	(0.01, 1, 0.1)	0	0	0.698678	higher
91	electrophysiological	AD-realted	Cluster4	mis	0.772958	0.00616869	0.419891	269	(0.01, 1, 0.1)	0	0	0.698678	higher
92	electrophysiological	AD-realted	Cluster5	syn	0.772958	0.00616869	0.419891	269	(0.01, 1, 0.1)	1	0	0.698678	higher
93	electrophysiological	AD-realted	Cluster5	spread	0.772958	0.00616869	0.419891	269	(0.01, 1, 0.1)	0	0	0.698678	higher
94	electrophysiological	AD-realted	Cluster2	syn	0.772958	0.00616869	0.419891	269	(0.01, 1, 0.1)	1	0	0.698678	higher
95	electrophysiological				0.772958	0.00616869	0.419891	269	(0.01, 1, 0.1)	0	1	0.698678	higher
96	electrophysiological	Cortical expansion	evoexp	mis	0.772926	0.00584802	0.404859	531	(0.01, 0.9, 0.1)	1	0	0.698678	higher
97	electrophysiological	AD-realted	APOE	syn	0.772773	0.00682432	0.342008	2086	(0.01, 0.5, 0.1)	0	0	0.698678	higher
98	electrophysiological	Celltype	Neuro-In	clear	0.772641	0.0068262	0.442147	235	(0.01, 0.9, 0.1)	1	0	0.698678	higher
99	electrophysiological	metabolism	cbf	syn	0.772252	0.00694046	0.325854	2723	(0.01, 0.5, 0.1)	0	0	0.698678	higher
100	electrophysiological	AD-realted	Abeta	clear	0.771784	0.00663823	0.428013	310	(0.01, 0.1, 0.1)	0	0	0.698678	higher
101	electrophysiological	metabolism	cbv	syn	0.771734	0.00583351	0.422279	287	(0.01, 1, 0.1)	1	0	0.698678	higher
102	electrophysiological	Receptors	D1	clear	0.771451	0.00646407	0.417357	474	(0.01, 0.1, 0.1)	1	0	0.698678	higher
103	electrophysiological	Cortical expansion	devexp	spread	0.771429	0.00663601	0.436046	1624	(0.5, 0.1, 0.1)	0	0	0.698678	higher
104	electrophysiological	Receptors	GABAa	syn	0.771203	0.0062488	0.356868	117	(0.01, 0.5, 1)	0	0	0.698678	higher
105	electrophysiological	Celltype	Micro	syn	0.771022	0.00588742	0.435985	38	(0.01, 1.5, 1)	0	0	0.698678	higher
106	electrophysiological	Cortical expansion	devexp	clear	0.770927	0.00651934	0.418981	345	(0.01, 0.1, 0.1)	0	0	0.698678	higher
107	electrophysiological	Receptors	NET	syn	0.770854	0.00656441	0.351494	64	(0.01, 0.9, 1)	0	0	0.698678	higher
108	electrophysiological	Receptors	D1	mis	0.770533	0.00659412	0.394749	321	(0.01, 1.5, 0.1)	0	0	0.698678	higher
109	electrophysiological	metabolism	cmr02	syn	0.770248	0.00662114	0.347917	434	(0.01, 0.5, 0.3)	0	0	0.698678	higher
110	electrophysiological	metabolism	cbv	clear	0.770196	0.00669672	0.390096	6431	(0.01, 0.1, 0.1)	0	0	0.698678	higher
111	electrophysiological	Cortical expansion	scalingpnc	spread	0.769884	0.0067471	0.443071	10860	(0.9, 0.1, 1)	0	0	0.698678	higher
112	electrophysiological	Cortical expansion	scaling	clear	0.769743	0.00715282	0.387824	451	(0.01, 0.1, 0.1)	0	0	0.698678	higher
113	electrophysiological	Celltype	Micro	clear	0.769516	0.00683873	0.408678	318	(0.01, 0.5, 0.1)	0	0	0.698678	higher
114	electrophysiological	Receptors	5HT6	syn	0.769446	0.00643675	0.358692	61	(0.01, 0.9, 1)	0	0	0.698678	higher
115	electrophysiological	Cortical expansion	scalingnih	clear	0.76893	0.00723673	0.381987	492	(0.01, 0.1, 0.1)	0	0	0.698678	higher
116	electrophysiological	Celltype	Neuro-Ex	mis	0.768924	0.00659998	0.393771	554	(0.01, 0.5, 0.1)	0	0	0.698678	higher
117	electrophysiological	Receptors	5HT2a	syn	0.768677	0.00658917	0.350882	58	(0.01, 0.9, 1)	0	0	0.698678	higher
118	electrophysiological	Celltype	Neuro-In	mis	0.768667	0.00659818	0.391685	573	(0.01, 0.5, 0.1)	0	0	0.698678	higher
119	electrophysiological	Cortical expansion	evoexp	syn	0.768556	0.00659336	0.402045	43	(0.01, 1, 1)	0	0	0.698678	higher
120	electrophysiological	Cortical expansion	evoexp	clear	0.768229	0.00701101	0.412586	399	(0.01, 0.1, 0.1)	0	0	0.698678	higher
121	electrophysiological	Receptors	5HT2a	mis	0.7679	0.00671485	0.391032	518	(0.01, 0.5, 0.1)	0	0	0.698678	higher
122	electrophysiological	Microstructure	genepc1	syn	0.767898	0.00623207	0.355604	494	(0.01, 0.5, 0.3)	0	0	0.698678	higher
123	electrophysiological	Receptors	mGluR5	mis	0.767731	0.00661574	0.387616	647	(0.01, 0.5, 0.1)	0	0	0.698678	higher
124	electrophysiological	Receptors	A4B2	mis	0.767646	0.00695208	0.388633	6209	(0.01, 0.1, 0.1)	0	0	0.698678	higher
125	electrophysiological	Receptors	H3	mis	0.76763	0.00697033	0.38913	5944	(0.01, 0.1, 0.1)	0	0	0.698678	higher
126	electrophysiological	Receptors	VAChT	mis	0.767583	0.00697661	0.386859	6210	(0.01, 0.1, 0.1)	0	0	0.698678	higher
127	electrophysiological	Receptors	5HTT	mis	0.767518	0.00697672	0.390326	1530	(0.01, 0.1, 0.1)	0	0	0.698678	higher
128	electrophysiological	Celltype	Endo	mis	0.767498	0.00694643	0.389673	1175	(0.01, 0.1, 0.1)	0	0	0.698678	higher
129	electrophysiological	Receptors	5HT6	mis	0.76749	0.00698725	0.388958	1132	(0.01, 0.1, 0.1)	0	0	0.698678	higher
130	electrophysiological	metabolism	cbv	mis	0.767453	0.00703459	0.388856	966	(0.01, 0.1, 0.1)	0	0	0.698678	higher
131	electrophysiological	Receptors	M1	mis	0.767396	0.00696629	0.388519	1079	(0.01, 0.1, 0.1)	0	0	0.698678	higher
132	electrophysiological	Receptors	H3	syn	0.767395	0.00710156	0.343092	57	(0.01, 0.9, 1)	0	0	0.698678	higher
133	electrophysiological	Receptors	NMDA	mis	0.767246	0.00701126	0.386964	1156	(0.01, 0.1, 0.1)	0	0	0.698678	higher
134	electrophysiological	Microstructure	myelinmap	mis	0.767059	0.00704266	0.388351	909	(0.01, 0.1, 0.1)	0	0	0.698678	higher
135	electrophysiological	Celltype	Oligo	mis	0.767045	0.00700323	0.38756	1161	(0.01, 0.1, 0.1)	0	0	0.698678	higher
136	electrophysiological	Microstructure	genepc1	mis	0.767016	0.00705834	0.387392	876	(0.01, 0.1, 0.1)	0	0	0.698678	higher
137	electrophysiological	Receptors	NET	mis	0.766988	0.00701391	0.38719	1123	(0.01, 0.1, 0.1)	0	0	0.698678	higher
138	electrophysiological	Receptors	GABAa	mis	0.766826	0.00706046	0.387087	952	(0.01, 0.1, 0.1)	0	0	0.698678	higher
139	electrophysiological	metabolism	cmr02	mis	0.76671	0.0070735	0.386506	881	(0.01, 0.1, 0.1)	0	0	0.698678	higher
140	electrophysiological	AD-realted	APOE	mis	0.766669	0.00706963	0.38617	885	(0.01, 0.1, 0.1)	0	0	0.698678	higher
141	electrophysiological	metabolism	cmrglc	mis	0.766665	0.00706123	0.386178	918	(0.01, 0.1, 0.1)	0	0	0.698678	higher
142	electrophysiological	Celltype	OPC	clear	0.766635	0.00697349	0.391513	584	(0.01, 0.1, 0.1)	0	0	0.698678	higher
143	electrophysiological	metabolism	cbf	mis	0.766601	0.00707911	0.386325	924	(0.01, 0.1, 0.1)	0	0	0.698678	higher
144	electrophysiological	Receptors	5HT1b	mis	0.766527	0.00708357	0.386215	952	(0.01, 0.1, 0.1)	0	0	0.698678	higher
145	electrophysiological	Cortical expansion	scalinghcp	clear	0.766503	0.0073241	0.375722	588	(0.01, 0.1, 0.1)	0	0	0.698678	higher
146	electrophysiological	Microstructure	myelinmap	syn	0.766347	0.00656345	0.376365	50	(0.01, 1, 1)	0	0	0.698678	higher
147	electrophysiological	Celltype	Astro	clear	0.766151	0.00687347	0.385491	637	(0.01, 0.1, 0.1)	0	0	0.698678	higher
148	electrophysiological	Receptors	A4B2	syn	0.765959	0.00711644	0.323971	58	(0.01, 1, 1)	0	0	0.698678	higher
149	electrophysiological	Cortical expansion	scalinghcp	syn	0.765956	0.00721097	0.422317	165	(0.7, 1, 0.1)	0	0	0.698678	higher
150	electrophysiological	Receptors	DAT	spread	0.765631	0.00742632	0.447774	50	(0.01, 1.5, 1)	0	0	0.698678	higher
151	electrophysiological	Receptors	CB1	clear	0.765549	0.00692223	0.416961	391	(0.01, 0.1, 0.1)	0	0	0.698678	higher
152	electrophysiological	Receptors	5HTT	clear	0.764994	0.00721465	0.376091	262	(0.01, 0.5, 0.1)	0	0	0.698678	higher
153	electrophysiological	Receptors	D1	syn	0.764567	0.00659086	0.39212	50	(0.01, 0.9, 1)	0	0	0.698678	higher
154	electrophysiological	Receptors	5HT4	syn	0.764467	0.00648313	0.396676	41	(0.01, 1, 1)	0	0	0.698678	higher
155	electrophysiological	Cortical expansion	scaling	syn	0.764322	0.00691546	0.352507	38	(0.01, 1.5, 1)	0	0	0.698678	higher
156	electrophysiological	Receptors	DAT	clear	0.763915	0.00700305	0.379183	1058	(0.01, 0.1, 0.1)	0	0	0.698678	higher
157	electrophysiological	Receptors	mGluR5	syn	0.763558	0.00727363	0.350196	53	(0.01, 0.9, 1)	0	0	0.698678	higher
158	electrophysiological	Cortical expansion	scalingnih	syn	0.763025	0.00724858	0.353253	36	(0.01, 1.5, 1)	0	0	0.698678	higher
159	electrophysiological	Cortical expansion	scalingpnc	syn	0.762987	0.00702149	0.311108	52	(0.01, 1, 1)	0	0	0.698678	higher
160	electrophysiological	Receptors	MOR	syn	0.762977	0.00679576	0.412963	39	(0.01, 1, 1)	0	0	0.698678	higher
161	electrophysiological	Receptors	5HT4	clear	0.76279	0.00756186	0.396618	508	(0.01, 0.1, 0.1)	0	0	0.698678	higher
162	electrophysiological	Receptors	MOR	clear	0.762665	0.00729489	0.396542	412	(0.01, 0.1, 0.1)	0	0	0.698678	higher
163	electrophysiological	Receptors	CB1	syn	0.761538	0.00701644	0.375908	42	(0.01, 1, 1)	0	0	0.698678	higher
164	electrophysiological	Celltype	Micro	spread	0.761007	0.00698023	0.400991	447	(0.01, 0.9, 0.1)	0	0	0.698678	higher
165	electrophysiological	Receptors	D2	clear	0.759279	0.0077648	0.373895	670	(0.01, 0.1, 0.1)	0	0	0.698678	higher
166	electrophysiological	Celltype	Neuro-In	syn	0.759235	0.0067413	0.405361	40	(0.01, 1, 1)	0	0	0.698678	higher
167	electrophysiological	Celltype	Neuro-Ex	syn	0.758822	0.00679571	0.405006	39	(0.01, 1, 1)	0	0	0.698678	higher
168	electrophysiological	Receptors	D1	spread	0.756938	0.0073923	0.431166	64	(0.5, 0.9, 1)	0	0	0.698678	higher
169	electrophysiological	AD-realted	MAPT	clear	0.756577	0.00828013	0.357373	796	(0.01, 0.1, 0.1)	0	0	0.698678	higher
170	electrophysiological	Cortical expansion	devexp	syn	0.756567	0.00714195	0.378697	51	(0.01, 0.9, 1)	0	0	0.698678	higher
171	electrophysiological	Receptors	5HT1a	clear	0.756126	0.00811212	0.362429	671	(0.01, 0.1, 0.1)	0	0	0.698678	higher
172	electrophysiological	Microstructure	thickness	clear	0.755905	0.00818888	0.366989	595	(0.01, 0.1, 0.1)	0	0	0.698678	higher
173	electrophysiological	AD-realted	Abeta	syn	0.75415	0.00792761	0.306368	47	(0.01, 1, 1)	0	0	0.698678	higher
174	electrophysiological	Celltype	Neuro-Ex	spread	0.751786	0.00789805	0.347405	644	(0.01, 0.5, 0.1)	0	0	0.698678	higher
175	electrophysiological	Celltype	Neuro-In	spread	0.747616	0.0080725	0.33663	607	(0.01, 0.5, 0.1)	0	0	0.698678	higher
176	electrophysiological	metabolism	cbv	spread	0.747068	0.00829011	0.365731	35	(0.01, 1.9, 1)	0	0	0.698678	higher
177	electrophysiological	Cortical expansion	evoexp	spread	0.742671	0.00823244	0.368488	29999	(0.3, 0.1, 0.1)	0	0	0.698678	higher
178	electrophysiological	Receptors	5HTT	spread	0.73947	0.0095843	0.34194	42	(0.01, 1.9, 1)	0	0	0.698678	higher
179	electrophysiological	Receptors	5HT2a	spread	0.738108	0.00851417	0.360503	145	(0.9, 0.1, 1)	0	0	0.698678	higher
180	electrophysiological	Receptors	5HT6	spread	0.736375	0.00887161	0.299978	29	(0.01, 2.9, 1)	0	0	0.698678	higher
181	electrophysiological	Celltype	Endo	spread	0.728861	0.00970895	0.315164	267	(0.01, 1, 0.1)	0	0	0.698678	higher
182	electrophysiological	Microstructure	myelinmap	spread	0.728773	0.00932626	0.330252	155	(0.9, 0.5, 1)	0	0	0.698678	higher
183	electrophysiological	Microstructure	genepc1	spread	0.728639	0.00902297	0.308887	167	(0.9, 0.1, 1)	0	0	0.698678	higher
184	electrophysiological	Receptors	M1	spread	0.726069	0.0100386	0.334607	153	(0.9, 0.1, 1)	0	0	0.698678	higher
185	electrophysiological	Receptors	A4B2	spread	0.72488	0.00957987	0.33965	305	(0.9, 0.5, 0.3)	0	0	0.698678	higher
186	electrophysiological	Receptors	H3	spread	0.723016	0.0101506	0.336948	195	(0.9, 0.5, 1)	0	0	0.698678	higher
187	electrophysiological	Receptors	NMDA	spread	0.722903	0.0103144	0.296398	29	(0.01, 2.5, 1)	0	0	0.698678	higher
188	electrophysiological	Receptors	mGluR5	spread	0.722666	0.0101945	0.337526	111	(0.9, 0.5, 1)	0	0	0.698678	higher
189	electrophysiological	Receptors	VAChT	spread	0.719125	0.0106605	0.313631	34	(0.01, 1.9, 1)	0	0	0.698678	higher
190	electrophysiological	metabolism	cmr02	spread	0.712085	0.0111849	0.275603	109	(0.9, 0.1, 1)	0	0	0.698678	higher
191	electrophysiological	Receptors	GABAa	spread	0.711153	0.0114405	0.293907	90	(0.9, 0.5, 1)	0	0	0.698678	higher
192	electrophysiological	Celltype	Oligo	spread	0.711003	0.0120364	0.278176	186	(0.1, 1, 0.1)	0	0	0.698678	higher
193	electrophysiological	Receptors	NET	spread	0.709546	0.012002	0.301832	107	(0.9, 0.5, 0.7)	0	0	0.698678	higher
194	electrophysiological	AD-realted	APOE	spread	0.708386	0.0119311	0.267862	93	(0.9, 0.1, 1)	0	0	0.698678	higher
195	electrophysiological	metabolism	cmrglc	spread	0.705337	0.0128272	0.266734	79	(0.9, 0.1, 1)	0	0	0.698678	higher
196	electrophysiological	metabolism	cbf	spread	0.704453	0.0131955	0.284432	96	(0.9, 0.5, 0.5)	0	0	0.698678	higher
197	electrophysiological	Receptors	5HT1b	spread	0.702738	0.01446	0.277573	88	(0.9, 0.1, 0.3)	0	0	0.698678	higher
1	temporal similarity	Cortical expansion	scalinghcp	mis	0.737565	0.00752275	0.318251	278	(0.7, 1.5, 1)	1	0	0.654288	higher
2	temporal similarity	Cortical expansion	scalinghcp	spread	0.733252	0.00612061	0.322171	4407	(0.01, 0.9, 0.1)	0	0	0.654288	higher
3	temporal similarity	Receptors	H3	clear	0.719155	0.00611724	0.48178	136	(0.7, 3, 0.1)	1	0	0.654288	higher
4	temporal similarity	Receptors	5HT4	mis	0.715248	0.0114271	0.184642	1254	(0.9, 1, 0.9)	1	0	0.654288	higher
5	temporal similarity	Cortical expansion	evoexp	clear	0.714582	0.0144758	0.346051	14	(0.9, 3, 1)	1	0	0.654288	higher
6	temporal similarity	Receptors	M1	clear	0.712751	0.0142804	0.347873	18	(0.9, 3, 1)	1	0	0.654288	higher
7	temporal similarity	Receptors	5HT1b	syn	0.712702	0.00618232	0.261783	429	(0.01, 0.9, 1)	1	0	0.654288	higher
8	temporal similarity	Receptors	5HT1b	clear	0.707723	0.0140505	0.379184	23	(0.9, 3, 0.1)	0	0	0.654288	higher
9	temporal similarity	Receptors	5HT6	clear	0.705484	0.0139504	0.367689	28	(0.9, 3, 0.1)	1	0	0.654288	higher
10	temporal similarity	Receptors	5HT2a	clear	0.700394	0.0144457	0.34038	21	(0.9, 2.9, 0.1)	1	0	0.654288	higher
11	temporal similarity	Receptors	mGluR5	clear	0.70027	0.0142724	0.316117	31	(0.9, 3, 0.1)	1	0	0.654288	higher
12	temporal similarity	Receptors	A4B2	clear	0.699458	0.0132366	0.344357	37	(0.9, 3, 0.1)	1	0	0.654288	higher
13	temporal similarity	Receptors	5HT2a	syn	0.698037	0.0116008	0.280972	715	(0.7, 0.9, 0.1)	0	0	0.654288	higher
14	temporal similarity	Receptors	GABAa	clear	0.697033	0.0139211	0.356611	30	(0.9, 3, 0.1)	1	0	0.654288	higher
15	temporal similarity	Receptors	VAChT	clear	0.693884	0.00823878	0.225606	127	(0.3, 0.9, 1)	1	0	0.654288	higher
16	temporal similarity	Cortical expansion	scaling	syn	0.692165	0.0095899	0.15941	324	(0.7, 1, 0.3)	1	0	0.654288	higher
17	temporal similarity	Celltype	Oligo	clear	0.690988	0.0115104	0.304779	1560	(0.7, 0.1, 0.5)	1	0	0.654288	higher
18	temporal similarity	Receptors	NET	clear	0.687529	0.0143398	0.296605	26	(0.9, 3, 0.1)	1	0	0.654288	higher
19	temporal similarity	Cortical expansion	scaling	mis	0.685955	0.0090772	0.167279	379	(0.7, 1.5, 0.3)	0	0	0.654288	higher
20	temporal similarity	Receptors	NET	syn	0.684751	0.00892353	0.182792	3095	(0.01, 0.9, 0.1)	0	0	0.654288	higher
21	temporal similarity	Receptors	5HT1a	mis	0.683415	0.0138301	0.277946	377	(0.9, 1.5, 0.1)	1	0	0.654288	higher
22	temporal similarity	Receptors	5HTT	clear	0.675592	0.0141174	0.262029	104	(0.9, 0.5, 1)	1	0	0.654288	higher
23	temporal similarity	Receptors	M1	syn	0.675208	0.0102656	0.155915	1826	(0.3, 0.9, 0.1)	0	0	0.654288	higher
24	temporal similarity	Receptors	5HT1a	syn	0.672759	0.0144442	0.256142	71	(0.9, 3, 0.1)	0	0	0.654288	higher
25	temporal similarity	Cortical expansion	scalinghcp	syn	0.671995	0.00626271	0.326711	249	(0.7, 1, 1)	0	0	0.654288	higher
26	temporal similarity	Receptors	5HT6	syn	0.670576	0.00966554	0.144956	2225	(0.3, 0.9, 0.1)	0	0	0.654288	higher
27	temporal similarity	Cortical expansion	evoexp	syn	0.668714	0.00701247	0.260913	1230	(0.5, 0.9, 0.1)	0	0	0.654288	higher
28	temporal similarity	Receptors	5HT2a	mis	0.667716	0.0127645	0.256919	5091	(0.9, 1, 0.1)	0	0	0.654288	higher
29	temporal similarity	Cortical expansion	scalingnih	syn	0.666986	0.013391	-0.00103434	4512	(0.9, 0.5, 1)	1	0	0.654288	higher
30	temporal similarity	metabolism	cbf	syn	0.665714	0.00933328	0.166256	581	(0.01, 0.9, 0.5)	1	0	0.654288	higher
31	temporal similarity	metabolism	cmrglc	syn	0.663109	0.00998159	0.161166	499	(0.01, 0.9, 0.5)	1	0	0.654288	higher
32	temporal similarity	Receptors	A4B2	syn	0.661425	0.00854711	0.316641	574	(0.3, 3, 1)	0	0	0.654288	higher
33	temporal similarity	Celltype	Endo	clear	0.660093	0.0158771	0.166862	12	(0.9, 3, 1)	1	0	0.654288	higher
34	temporal similarity	Cortical expansion	scalingpnc	syn	0.659643	0.0121773	-0.032412	761	(0.5, 1, 0.1)	1	0	0.654288	higher
35	temporal similarity	Cortical expansion	scalingnih	mis	0.658452	0.0131412	0.00598299	1208	(0.9, 1, 0.5)	0	0	0.654288	higher
36	temporal similarity	Cortical expansion	scalingpnc	clear	0.657512	0.0175355	0.196935	1	(0.9, 3, 0.1)	0	0	0.654288	higher
37	temporal similarity	AD-realted	APOE	clear	0.657507	0.017485	0.198968	2	(0.9, 1.9, 0.1)	1	0	0.654288	higher
38	temporal similarity	Cortical expansion	devexp	clear	0.657499	0.0174635	0.18594	1	(0.9, 3, 0.1)	1	0	0.654288	higher
39	temporal similarity	metabolism	cmr02	clear	0.657497	0.0175492	0.201105	1	(0.9, 1.5, 0.1)	1	0	0.654288	higher
40	temporal similarity	Receptors	5HTT	syn	0.657485	0.0173428	0.198959	1	(0.9, 3, 1)	0	0	0.654288	higher
41	temporal similarity	AD-realted	MAPT	syn	0.657484	0.0173391	0.199317	1	(0.9, 3, 0.1)	1	0	0.654288	higher
42	temporal similarity	AD-realted	Abeta	clear	0.657476	0.0175837	0.199607	1	(0.9, 1.9, 0.1)	1	0	0.654288	higher
43	temporal similarity	Microstructure	myelinmap	clear	0.657474	0.0174482	0.192513	1	(0.9, 3, 1)	1	0	0.654288	higher
44	temporal similarity	Celltype	Micro	clear	0.657459	0.0172996	0.198765	1	(0.9, 3, 0.1)	1	0	0.654288	higher
45	temporal similarity	Cortical expansion	scaling	clear	0.657454	0.0173038	0.197497	1	(0.1, 3, 1)	0	0	0.654288	higher
46	temporal similarity	Celltype	Astro	syn	0.657452	0.0172963	0.19231	1	(0.9, 3, 0.1)	1	0	0.654288	higher
47	temporal similarity	metabolism	cbf	clear	0.657446	0.01753	0.179604	2	(0.9, 2.5, 0.1)	0	0	0.654288	higher
48	temporal similarity	Microstructure	thickness	mis	0.657446	0.0172816	0.19771	1	(0.9, 3, 0.1)	1	0	0.654288	higher
49	temporal similarity	Microstructure	thickness	syn	0.657445	0.0173462	0.192826	1	(0.9, 3, 0.1)	0	0	0.654288	higher
50	temporal similarity	Microstructure	genepc1	clear	0.657443	0.0176528	0.192444	1	(0.9, 3, 1)	1	0	0.654288	higher
51	temporal similarity	Receptors	5HT1a	spread	0.657442	0.0172793	0.198773	1	(0.9, 3, 1)	0	0	0.654288	higher
52	temporal similarity	metabolism	cmrglc	clear	0.657442	0.0176434	0.189763	2	(0.9, 2.9, 0.1)	0	0	0.654288	higher
53	temporal similarity	Celltype	Astro	spread	0.657442	0.0172796	0.198771	1	(0.9, 3, 1)	0	0	0.654288	higher
54	temporal similarity	metabolism	cbv	clear	0.657441	0.0173016	0.186924	1	(0.7, 3, 0.1)	1	0	0.654288	higher
55	temporal similarity	Microstructure	thickness	spread	0.657439	0.017282	0.198817	1	(0.9, 3, 0.1)	0	0	0.654288	higher
56	temporal similarity	Receptors	5HTT	mis	0.657439	0.0172816	0.199022	1	(0.9, 3, 0.1)	0	0	0.654288	higher
57	temporal similarity	metabolism	cbv	spread	0.657439	0.017282	0.198816	1	(0.9, 3, 0.1)	0	0	0.654288	higher
58	temporal similarity	Microstructure	genepc1	spread	0.657439	0.017282	0.198816	1	(0.9, 3, 0.1)	0	0	0.654288	higher
59	temporal similarity	Microstructure	myelinmap	spread	0.657439	0.017282	0.198816	1	(0.9, 3, 0.1)	0	0	0.654288	higher
60	temporal similarity	AD-realted	MAPT	spread	0.657439	0.017282	0.198815	1	(0.9, 3, 0.1)	0	0	0.654288	higher
61	temporal similarity	Celltype	OPC	spread	0.657439	0.017282	0.198815	1	(0.9, 3, 0.1)	1	0	0.654288	higher
62	temporal similarity	Receptors	DAT	spread	0.657439	0.017282	0.198816	1	(0.9, 3, 0.1)	1	0	0.654288	higher
63	temporal similarity	Celltype	Neuro-Ex	spread	0.657439	0.017282	0.198815	1	(0.9, 3, 0.1)	1	0	0.654288	higher
64	temporal similarity	Celltype	Micro	spread	0.657438	0.017282	0.198815	1	(0.9, 3, 0.1)	0	0	0.654288	higher
65	temporal similarity	AD-realted	Cluster6	clear	0.657438	0.017282	0.198815	1	(0.9, 3, 0.1)	0	0	0.654288	higher
66	temporal similarity	AD-realted	Cluster6	mis	0.657438	0.017282	0.198815	1	(0.9, 3, 0.1)	0	0	0.654288	higher
67	temporal similarity	AD-realted	Cluster6	spread	0.657438	0.017282	0.198815	1	(0.9, 3, 0.1)	0	0	0.654288	higher
68	temporal similarity	AD-realted	Cluster6	syn	0.657438	0.017282	0.198815	1	(0.9, 3, 0.1)	1	0	0.654288	higher
69	temporal similarity	AD-realted	Cluster7	clear	0.657438	0.017282	0.198815	1	(0.9, 3, 0.1)	1	0	0.654288	higher
70	temporal similarity	AD-realted	Cluster2	clear	0.657438	0.017282	0.198815	1	(0.9, 3, 0.1)	0	0	0.654288	higher
71	temporal similarity	AD-realted	Cluster5	mis	0.657438	0.017282	0.198815	1	(0.9, 3, 0.1)	0	0	0.654288	higher
72	temporal similarity	AD-realted	Cluster7	mis	0.657438	0.017282	0.198815	1	(0.9, 3, 0.1)	0	0	0.654288	higher
73	temporal similarity	AD-realted	Cluster7	spread	0.657438	0.017282	0.198815	1	(0.9, 3, 0.1)	0	0	0.654288	higher
74	temporal similarity	AD-realted	Cluster7	syn	0.657438	0.017282	0.198815	1	(0.9, 3, 0.1)	0	0	0.654288	higher
75	temporal similarity	AD-realted	Cluster1	syn	0.657438	0.017282	0.198815	1	(0.9, 3, 0.1)	1	0	0.654288	higher
76	temporal similarity	AD-realted	Cluster1	spread	0.657438	0.017282	0.198815	1	(0.9, 3, 0.1)	0	0	0.654288	higher
77	temporal similarity	AD-realted	Cluster1	mis	0.657438	0.017282	0.198815	1	(0.9, 3, 0.1)	0	0	0.654288	higher
78	temporal similarity	AD-realted	Cluster1	clear	0.657438	0.017282	0.198815	1	(0.9, 3, 0.1)	0	0	0.654288	higher
79	temporal similarity	AD-realted	Cluster5	clear	0.657438	0.017282	0.198815	1	(0.9, 3, 0.1)	0	0	0.654288	higher
80	temporal similarity	AD-realted	Cluster2	syn	0.657438	0.017282	0.198815	1	(0.9, 3, 0.1)	1	0	0.654288	higher
81	temporal similarity	AD-realted	Cluster5	spread	0.657438	0.017282	0.198815	1	(0.9, 3, 0.1)	0	0	0.654288	higher
82	temporal similarity	AD-realted	Cluster3	syn	0.657438	0.017282	0.198815	1	(0.9, 3, 0.1)	1	0	0.654288	higher
83	temporal similarity	AD-realted	Cluster5	syn	0.657438	0.017282	0.198815	1	(0.9, 3, 0.1)	1	0	0.654288	higher
84	temporal similarity	AD-realted	Cluster2	spread	0.657438	0.017282	0.198815	1	(0.9, 3, 0.1)	0	0	0.654288	higher
85	temporal similarity	AD-realted	Cluster4	clear	0.657438	0.017282	0.198815	1	(0.9, 3, 0.1)	0	0	0.654288	higher
86	temporal similarity	AD-realted	Cluster4	mis	0.657438	0.017282	0.198815	1	(0.9, 3, 0.1)	0	0	0.654288	higher
87	temporal similarity	AD-realted	Cluster4	spread	0.657438	0.017282	0.198815	1	(0.9, 3, 0.1)	0	0	0.654288	higher
88	temporal similarity	AD-realted	Cluster2	mis	0.657438	0.017282	0.198815	1	(0.9, 3, 0.1)	0	0	0.654288	higher
89	temporal similarity	AD-realted	Cluster3	clear	0.657438	0.017282	0.198815	1	(0.9, 3, 0.1)	0	0	0.654288	higher
90	temporal similarity	AD-realted	Cluster3	mis	0.657438	0.017282	0.198815	1	(0.9, 3, 0.1)	0	0	0.654288	higher
91	temporal similarity	AD-realted	Cluster3	spread	0.657438	0.017282	0.198815	1	(0.9, 3, 0.1)	0	0	0.654288	higher
92	temporal similarity	AD-realted	Cluster4	syn	0.657438	0.017282	0.198815	1	(0.9, 3, 0.1)	1	0	0.654288	higher
93	temporal similarity				0.657438	0.017282	0.198815	1	(0.9, 3, 0.1)	0	1	0.654288	higher
94	temporal similarity	Receptors	D2	spread	0.657438	0.017282	0.198815	1	(0.9, 3, 0.1)	1	0	0.654288	higher
95	temporal similarity	Cortical expansion	scaling	spread	0.657438	0.017282	0.198814	1	(0.9, 3, 0.1)	0	0	0.654288	higher
96	temporal similarity	AD-realted	APOE	spread	0.657438	0.017282	0.198815	1	(0.9, 3, 0.1)	0	0	0.654288	higher
97	temporal similarity	Receptors	5HTT	spread	0.657438	0.017282	0.198814	1	(0.9, 3, 0.1)	0	0	0.654288	higher
98	temporal similarity	Celltype	Neuro-In	spread	0.657438	0.017282	0.198814	1	(0.9, 3, 0.1)	1	0	0.654288	higher
99	temporal similarity	Celltype	Oligo	spread	0.657438	0.017282	0.198814	1	(0.9, 3, 0.1)	0	0	0.654288	higher
100	temporal similarity	AD-realted	Abeta	spread	0.657438	0.017282	0.198814	1	(0.9, 3, 0.1)	0	0	0.654288	higher
101	temporal similarity	metabolism	cmr02	spread	0.657438	0.017282	0.198814	1	(0.9, 3, 0.1)	0	0	0.654288	higher
102	temporal similarity	Celltype	OPC	clear	0.657438	0.0172724	0.194511	1	(0.9, 3, 0.1)	0	0	0.654288	higher
103	temporal similarity	Celltype	Endo	spread	0.657438	0.017282	0.198814	1	(0.9, 3, 0.1)	0	0	0.654288	higher
104	temporal similarity	Cortical expansion	scalingnih	spread	0.657438	0.017282	0.198813	1	(0.9, 3, 0.1)	0	0	0.654288	higher
105	temporal similarity	metabolism	cbf	spread	0.657438	0.017282	0.198814	1	(0.9, 3, 0.1)	0	0	0.654288	higher
106	temporal similarity	Cortical expansion	scalingpnc	spread	0.657438	0.017282	0.198813	1	(0.9, 3, 0.1)	0	0	0.654288	higher
107	temporal similarity	metabolism	cmrglc	spread	0.657438	0.017282	0.198814	1	(0.9, 3, 0.1)	0	0	0.654288	higher
108	temporal similarity	Receptors	5HT4	spread	0.657438	0.017282	0.198815	1	(0.9, 3, 0.1)	0	0	0.654288	higher
109	temporal similarity	Cortical expansion	devexp	spread	0.657438	0.017282	0.198814	1	(0.9, 3, 0.1)	0	0	0.654288	higher
110	temporal similarity	Receptors	D1	spread	0.657438	0.017282	0.198814	1	(0.9, 3, 0.1)	1	0	0.654288	higher
111	temporal similarity	Receptors	MOR	spread	0.657438	0.017282	0.198814	1	(0.9, 3, 0.1)	1	0	0.654288	higher
112	temporal similarity	Receptors	A4B2	spread	0.657438	0.017282	0.198813	1	(0.9, 3, 0.1)	0	0	0.654288	higher
113	temporal similarity	Receptors	5HT2a	spread	0.657438	0.017282	0.198813	1	(0.9, 3, 0.1)	0	0	0.654288	higher
114	temporal similarity	Cortical expansion	evoexp	spread	0.657437	0.017282	0.198813	1	(0.9, 3, 0.1)	0	0	0.654288	higher
115	temporal similarity	Receptors	M1	spread	0.657437	0.017282	0.198813	1	(0.9, 3, 0.1)	0	0	0.654288	higher
116	temporal similarity	Receptors	CB1	spread	0.657437	0.017282	0.198814	1	(0.9, 3, 0.1)	1	0	0.654288	higher
117	temporal similarity	Receptors	VAChT	spread	0.657437	0.017282	0.198813	1	(0.9, 3, 0.1)	0	0	0.654288	higher
118	temporal similarity	Receptors	NMDA	spread	0.657437	0.017282	0.198813	1	(0.9, 3, 0.1)	1	0	0.654288	higher
119	temporal similarity	Receptors	NET	spread	0.657437	0.017282	0.198812	1	(0.9, 3, 0.1)	0	0	0.654288	higher
120	temporal similarity	Receptors	5HT6	spread	0.657437	0.017282	0.198812	1	(0.9, 3, 0.1)	0	0	0.654288	higher
121	temporal similarity	Receptors	5HT1b	spread	0.657437	0.017282	0.198812	1	(0.9, 3, 0.1)	0	0	0.654288	higher
122	temporal similarity	Receptors	GABAa	spread	0.657437	0.017282	0.198812	1	(0.9, 3, 0.1)	0	0	0.654288	higher
123	temporal similarity	Receptors	H3	spread	0.657437	0.017282	0.198811	1	(0.9, 3, 0.1)	0	0	0.654288	higher
124	temporal similarity	Receptors	mGluR5	spread	0.657437	0.017282	0.198811	1	(0.9, 3, 0.1)	0	0	0.654288	higher
125	temporal similarity	AD-realted	MAPT	mis	0.657435	0.0172807	0.198187	1	(0.9, 3, 0.1)	0	0	0.654288	higher
126	temporal similarity	Receptors	D2	mis	0.657433	0.0172733	0.191234	1	(0.9, 3, 0.1)	0	0	0.654288	higher
127	temporal similarity	Celltype	Neuro-In	clear	0.657425	0.0172682	0.190209	1	(0.9, 3, 0.1)	0	0	0.654288	higher
128	temporal similarity	Celltype	Neuro-Ex	mis	0.657422	0.0172571	0.197959	1	(0.9, 3, 0.1)	0	0	0.654288	higher
129	temporal similarity	Celltype	Oligo	mis	0.657422	0.0172564	0.197563	1	(0.9, 3, 0.1)	0	0	0.654288	higher
130	temporal similarity	Cortical expansion	scalinghcp	clear	0.657422	0.0172639	0.196666	1	(0.01, 3, 1)	0	0	0.654288	higher
131	temporal similarity	Receptors	H3	syn	0.657421	0.0172525	0.197825	1	(0.7, 3, 0.1)	0	0	0.654288	higher
132	temporal similarity	Celltype	Neuro-Ex	clear	0.657419	0.0172547	0.192925	1	(0.9, 3, 0.1)	0	0	0.654288	higher
133	temporal similarity	Celltype	Neuro-In	mis	0.657419	0.0172528	0.197147	1	(0.9, 3, 0.1)	0	0	0.654288	higher
134	temporal similarity	Receptors	DAT	mis	0.657418	0.0172789	0.18616	1	(0.9, 3, 0.1)	0	0	0.654288	higher
135	temporal similarity	Celltype	OPC	mis	0.657416	0.017251	0.198413	1	(0.9, 3, 0.1)	0	0	0.654288	higher
136	temporal similarity	Celltype	Micro	syn	0.657413	0.017279	0.194694	1	(0.9, 3, 0.1)	0	0	0.654288	higher
137	temporal similarity	metabolism	cbv	mis	0.657411	0.0172468	0.193093	1	(0.9, 3, 0.1)	0	0	0.654288	higher
138	temporal similarity	Cortical expansion	evoexp	mis	0.657406	0.0172403	0.194419	1	(0.9, 3, 0.1)	0	0	0.654288	higher
139	temporal similarity	Celltype	Astro	clear	0.657403	0.0172727	0.193697	1	(0.7, 3, 0.1)	0	0	0.654288	higher
140	temporal similarity	Celltype	Endo	syn	0.657402	0.0172878	0.178566	1	(0.7, 3, 1)	0	0	0.654288	higher
141	temporal similarity	Celltype	Micro	mis	0.657402	0.0172407	0.199221	1	(0.9, 3, 0.1)	0	0	0.654288	higher
142	temporal similarity	Celltype	Astro	mis	0.657401	0.0172527	0.196585	1	(0.9, 3, 0.1)	0	0	0.654288	higher
143	temporal similarity	Receptors	NMDA	clear	0.6574	0.017308	0.180817	1	(0.3, 3, 0.1)	0	0	0.654288	higher
144	temporal similarity	Receptors	D1	clear	0.6574	0.0173314	0.178626	1	(0.5, 3, 0.1)	0	0	0.654288	higher
145	temporal similarity	Celltype	Neuro-Ex	syn	0.6574	0.0173131	0.189603	1	(0.9, 3, 0.1)	0	0	0.654288	higher
146	temporal similarity	Celltype	OPC	syn	0.657392	0.0173006	0.189839	1	(0.9, 3, 0.1)	0	0	0.654288	higher
147	temporal similarity	Receptors	GABAa	syn	0.657392	0.0172588	0.193147	1	(0.01, 3, 0.1)	0	0	0.654288	higher
148	temporal similarity	Cortical expansion	scalingnih	clear	0.657391	0.0172721	0.195117	1	(0.01, 3, 1)	0	0	0.654288	higher
149	temporal similarity	Microstructure	genepc1	syn	0.657389	0.0172467	0.187069	1	(0.3, 3, 0.1)	0	0	0.654288	higher
150	temporal similarity	Cortical expansion	devexp	mis	0.657383	0.0172234	0.191838	1	(0.9, 3, 0.1)	0	0	0.654288	higher
151	temporal similarity	Microstructure	thickness	clear	0.657381	0.0172183	0.193762	1	(0.9, 3, 0.1)	0	0	0.654288	higher
152	temporal similarity	Celltype	Oligo	syn	0.65738	0.017311	0.187644	1	(0.9, 3, 0.1)	0	0	0.654288	higher
153	temporal similarity	AD-realted	APOE	syn	0.657375	0.0172461	0.193306	1	(0.01, 3, 0.1)	0	0	0.654288	higher
154	temporal similarity	Celltype	Endo	mis	0.657375	0.0172582	0.191941	1	(0.9, 3, 0.1)	0	0	0.654288	higher
155	temporal similarity	Receptors	5HT1a	clear	0.657372	0.0172109	0.197753	1	(0.9, 3, 0.1)	0	0	0.654288	higher
156	temporal similarity	Receptors	MOR	mis	0.657372	0.0172709	0.180543	1	(0.9, 2.9, 0.1)	0	0	0.654288	higher
157	temporal similarity	Receptors	mGluR5	mis	0.657371	0.0172109	0.193959	1	(0.9, 3, 0.1)	0	0	0.654288	higher
158	temporal similarity	Receptors	VAChT	mis	0.657371	0.0172334	0.186005	1	(0.9, 2, 0.1)	0	0	0.654288	higher
159	temporal similarity	Celltype	Neuro-In	syn	0.657371	0.0172902	0.188216	1	(0.5, 3, 0.1)	0	0	0.654288	higher
160	temporal similarity	Receptors	M1	mis	0.65737	0.0172094	0.197761	1	(0.9, 3, 0.1)	0	0	0.654288	higher
161	temporal similarity	Receptors	D1	mis	0.657368	0.0172346	0.185338	1	(0.9, 3, 0.1)	0	0	0.654288	higher
162	temporal similarity	Receptors	H3	mis	0.657365	0.0172148	0.197542	1	(0.9, 3, 0.1)	0	0	0.654288	higher
163	temporal similarity	AD-realted	MAPT	clear	0.657364	0.0172163	0.196841	1	(0.9, 3, 0.1)	0	0	0.654288	higher
164	temporal similarity	Microstructure	myelinmap	syn	0.657363	0.0172495	0.182824	1	(0.01, 3, 0.1)	0	0	0.654288	higher
165	temporal similarity	Receptors	NMDA	mis	0.657362	0.0172368	0.183971	1	(0.9, 2.5, 0.1)	0	0	0.654288	higher
166	temporal similarity	Receptors	CB1	mis	0.657361	0.0172265	0.18562	1	(0.9, 1, 0.1)	0	0	0.654288	higher
167	temporal similarity	Receptors	5HT6	mis	0.657361	0.0172039	0.199205	1	(0.9, 3, 0.1)	0	0	0.654288	higher
168	temporal similarity	metabolism	cmr02	mis	0.657359	0.0172039	0.198942	1	(0.9, 3, 0.1)	0	0	0.654288	higher
169	temporal similarity	AD-realted	Abeta	mis	0.657359	0.0172033	0.199035	1	(0.9, 3, 0.1)	0	0	0.654288	higher
170	temporal similarity	Receptors	NET	mis	0.657358	0.0172029	0.199121	1	(0.9, 3, 0.1)	0	0	0.654288	higher
171	temporal similarity	AD-realted	Abeta	syn	0.657357	0.0172598	0.189454	1	(0.01, 3, 0.1)	0	0	0.654288	higher
172	temporal similarity	Receptors	MOR	clear	0.657356	0.0172437	0.182716	1	(0.01, 3, 0.1)	0	0	0.654288	higher
173	temporal similarity	Microstructure	myelinmap	mis	0.657356	0.0172161	0.195529	1	(0.9, 1.9, 0.1)	0	0	0.654288	higher
174	temporal similarity	Receptors	A4B2	mis	0.657356	0.0172035	0.198339	1	(0.9, 3, 0.1)	0	0	0.654288	higher
175	temporal similarity	Receptors	GABAa	mis	0.657356	0.0172032	0.198385	1	(0.9, 3, 0.1)	0	0	0.654288	higher
176	temporal similarity	AD-realted	APOE	mis	0.657356	0.0172035	0.198257	1	(0.9, 3, 0.1)	0	0	0.654288	higher
177	temporal similarity	Receptors	5HT1b	mis	0.657355	0.0172034	0.198119	1	(0.9, 0.1, 0.1)	0	0	0.654288	higher
178	temporal similarity	metabolism	cmrglc	mis	0.657355	0.0172034	0.198121	1	(0.9, 0.1, 0.1)	0	0	0.654288	higher
179	temporal similarity	metabolism	cbf	mis	0.657355	0.0172034	0.198102	1	(0.9, 0.1, 0.1)	0	0	0.654288	higher
180	temporal similarity	Microstructure	genepc1	mis	0.657355	0.0172035	0.198077	1	(0.9, 0.1, 0.1)	0	0	0.654288	higher
181	temporal similarity	Cortical expansion	scalingpnc	mis	0.657353	0.0172042	0.197581	1	(0.9, 0.1, 0.1)	0	0	0.654288	higher
182	temporal similarity	Receptors	DAT	clear	0.657346	0.0172289	0.182912	1	(0.3, 3, 0.1)	0	0	0.654288	higher
183	temporal similarity	metabolism	cmr02	syn	0.657331	0.017249	0.187894	1	(0.01, 3, 0.1)	0	0	0.654288	higher
184	temporal similarity	Receptors	D2	clear	0.657306	0.0172552	0.175468	1	(0.9, 2.9, 0.1)	0	0	0.654288	higher
185	temporal similarity	Receptors	CB1	clear	0.657301	0.0172704	0.175748	1	(0.01, 3, 0.5)	0	0	0.654288	higher
186	temporal similarity	Receptors	5HT4	clear	0.65728	0.0172684	0.172442	1	(0.01, 3, 0.1)	0	0	0.654288	higher
187	temporal similarity	Receptors	D2	syn	0.657255	0.0172901	0.178908	1	(0.1, 3, 0.1)	0	0	0.654288	higher
188	temporal similarity	Receptors	DAT	syn	0.657198	0.0172725	0.176885	1	(0.01, 3, 1)	0	0	0.654288	higher
189	temporal similarity	Receptors	mGluR5	syn	0.657164	0.0172305	0.173326	1	(0.01, 3, 1)	0	0	0.654288	higher
190	temporal similarity	metabolism	cbv	syn	0.657148	0.0172692	0.173672	1	(0.01, 3, 0.1)	0	0	0.654288	higher
191	temporal similarity	Cortical expansion	devexp	syn	0.656954	0.0172382	0.163752	1	(0.01, 3, 1)	0	0	0.654288	higher
192	temporal similarity	Receptors	MOR	syn	0.656919	0.0172786	0.160345	1	(0.01, 3, 1)	0	0	0.654288	higher
193	temporal similarity	Receptors	D1	syn	0.656908	0.0172654	0.161168	1	(0.01, 3, 1)	0	0	0.654288	higher
194	temporal similarity	Receptors	VAChT	syn	0.656623	0.0172858	0.148308	1	(0.01, 3, 1)	0	0	0.654288	higher
195	temporal similarity	Receptors	NMDA	syn	0.656596	0.0172819	0.147256	1	(0.01, 3, 1)	0	0	0.654288	higher
196	temporal similarity	Receptors	5HT4	syn	0.655798	0.0173301	0.122485	1	(0.01, 3, 1)	0	0	0.654288	higher
197	temporal similarity	Receptors	CB1	syn	0.65557	0.016588	0.191712	12	(0.9, 3, 0.1)	0	0	0.654288	higher

## Sheet: Tau load
	Connectivity	Factor type	Factor	Rate	R	MSE	EV	Time	Hyperparam	Best rate	Baseline model	Null model (95%CI)	> Null 95%CI
1	structural connectivity	AD-realted	MAPT	mis	0.804456	0.0357711	0.629553	661	(0.7, 2, 1)	1	0	0.406256	higher
2	structural connectivity	AD-realted	MAPT	syn	0.789186	0.0359898	0.595448	840	(0.3, 2.5, 0.3)	0	0	0.406256	higher
3	structural connectivity	AD-realted	Abeta	spread	0.786908	0.0244736	0.535715	29999	(0.01, 0.1, 1)	1	0	0.406256	higher
4	structural connectivity	metabolism	cbf	clear	0.705468	0.0407092	0.43998	240	(0.01, 2, 1)	1	0	0.406256	higher
5	structural connectivity	Receptors	5HT4	spread	0.646833	0.0227312	0.364764	20167	(0.9, 3, 1)	1	0	0.406256	higher
6	structural connectivity	AD-realted	MAPT	spread	0.64515	0.0256113	0.36957	5878	(0.9, 3, 0.1)	0	0	0.406256	higher
7	structural connectivity	Receptors	5HT2a	spread	0.632712	0.0283589	0.217644	29999	(0.7, 0.5, 0.9)	1	0	0.406256	higher
8	structural connectivity	Receptors	5HT1a	spread	0.627631	0.0312666	0.275127	29999	(0.7, 3, 1)	1	0	0.406256	higher
9	structural connectivity	Receptors	5HT4	syn	0.603549	0.0536869	0.278434	786	(0.9, 1, 0.1)	0	0	0.406256	higher
10	structural connectivity	Receptors	5HT4	mis	0.602766	0.0436882	0.306806	317	(0.9, 2.9, 0.7)	0	0	0.406256	higher
11	structural connectivity	Cortical expansion	scalingnih	syn	0.601966	0.0390149	0.327139	180	(0.9, 2.9, 0.3)	1	0	0.406256	higher
12	structural connectivity	Cortical expansion	scaling	syn	0.58153	0.0407718	0.30235	201	(0.9, 3, 0.1)	1	0	0.406256	higher
13	structural connectivity	Cortical expansion	scalinghcp	syn	0.577328	0.0333691	0.296725	167	(0.9, 3, 0.7)	1	0	0.406256	higher
14	structural connectivity	Receptors	D2	spread	0.574151	0.0232226	0.194804	29999	(0.9, 3, 1)	1	0	0.406256	higher
15	structural connectivity	Cortical expansion	evoexp	spread	0.57224	0.0252688	0.232791	2407	(0.9, 1.5, 0.1)	1	0	0.406256	higher
16	structural connectivity	Receptors	D2	syn	0.56788	0.0431624	0.283785	1541	(0.9, 0.9, 0.1)	0	0	0.406256	higher
17	structural connectivity	Cortical expansion	devexp	spread	0.566195	0.0296502	0.105149	3013	(0.9, 3, 0.1)	1	0	0.406256	higher
18	structural connectivity	Receptors	D2	mis	0.563588	0.0449182	0.279785	1154	(0.9, 1.9, 0.1)	0	0	0.406256	higher
19	structural connectivity	Cortical expansion	evoexp	mis	0.563367	0.0727575	0.0517797	461	(0.9, 1.5, 0.5)	0	0	0.406256	higher
20	structural connectivity	Cortical expansion	scalingnih	mis	0.561656	0.0446398	0.225041	465	(0.9, 3, 0.1)	0	0	0.406256	higher
21	structural connectivity	Receptors	5HT1a	mis	0.5616	0.0240627	0.158569	29999	(0.3, 3, 1)	0	0	0.406256	higher
22	structural connectivity	Receptors	5HT1a	syn	0.558841	0.029997	0.196505	740	(0.5, 3, 1)	0	0	0.406256	higher
23	structural connectivity	Cortical expansion	evoexp	syn	0.557549	0.073623	0.0630637	321	(0.9, 1, 0.3)	0	0	0.406256	higher
24	structural connectivity	Cortical expansion	scalinghcp	mis	0.544082	0.0823643	-0.459071	358	(0.9, 1.9, 0.1)	0	0	0.406256	higher
25	structural connectivity	Receptors	5HT2a	mis	0.539443	0.0789356	-0.288618	803	(0.7, 2, 0.3)	0	0	0.406256	higher
26	structural connectivity	Receptors	5HT2a	syn	0.538583	0.0820852	-0.210334	578	(0.3, 2.9, 0.1)	0	0	0.406256	higher
27	structural connectivity	Receptors	MOR	spread	0.534764	0.0224343	0.0248077	1757	(0.9, 1.5, 0.1)	1	0	0.406256	higher
28	structural connectivity	Receptors	5HT1b	clear	0.531067	0.0386648	0.226032	180	(0.1, 3, 1)	1	0	0.406256	higher
29	structural connectivity	Cortical expansion	scaling	mis	0.530165	0.045835	0.22752	496	(0.9, 3, 0.1)	0	0	0.406256	higher
30	structural connectivity	metabolism	cbf	syn	0.528338	0.0627837	-0.243449	29999	(0.01, 3, 1)	0	0	0.406256	higher
31	structural connectivity	Receptors	CB1	spread	0.528108	0.024677	0.0961305	2059	(0.9, 1.5, 0.1)	1	0	0.406256	higher
32	structural connectivity	Microstructure	thickness	spread	0.526701	0.0268829	0.138479	1261	(0.9, 1.5, 0.3)	1	0	0.406256	higher
33	structural connectivity	Cortical expansion	devexp	syn	0.521819	0.0771227	-0.475468	948	(0.9, 0.9, 0.1)	0	0	0.406256	higher
34	structural connectivity	Cortical expansion	devexp	mis	0.519549	0.0766089	-0.441136	773	(0.9, 1.9, 0.1)	0	0	0.406256	higher
35	structural connectivity	Receptors	VAChT	clear	0.513918	0.0730734	-0.139404	56	(0.7, 3, 1)	1	0	0.406256	higher
36	structural connectivity	Cortical expansion	scaling	spread	0.513098	0.0331689	0.105237	7337	(0.01, 0.9, 1)	0	0	0.406256	higher
37	structural connectivity	AD-realted	Abeta	syn	0.503672	0.0475402	0.0592712	182	(0.9, 3, 0.1)	0	0	0.406256	higher
38	structural connectivity	Celltype	OPC	spread	0.487356	0.0302372	0.0962228	913	(0.9, 3, 1)	1	0	0.406256	higher
39	structural connectivity	Cortical expansion	scalingpnc	spread	0.483119	0.0330547	0.0925744	2566	(0.9, 3, 0.1)	1	0	0.406256	higher
40	structural connectivity	metabolism	cmrglc	clear	0.481474	0.0394993	0.130543	179	(0.5, 3, 1)	1	0	0.406256	higher
41	structural connectivity	Cortical expansion	scalinghcp	spread	0.480463	0.0370492	0.110566	3111	(0.9, 3, 0.1)	0	0	0.406256	higher
42	structural connectivity	Microstructure	thickness	syn	0.473661	0.0387272	0.0863523	2497	(0.7, 1.5, 0.1)	0	0	0.406256	higher
43	structural connectivity	Celltype	OPC	mis	0.469304	0.0842943	-0.670044	299	(0.9, 1.5, 1)	0	0	0.406256	higher
44	structural connectivity	Celltype	OPC	syn	0.467586	0.0780456	-0.2952	210	(0.9, 1.5, 0.7)	0	0	0.406256	higher
45	structural connectivity	Microstructure	thickness	mis	0.467208	0.0438346	0.0256632	1348	(0.9, 2, 0.1)	0	0	0.406256	higher
46	structural connectivity	Celltype	Astro	spread	0.466607	0.0339861	0.0955842	805	(0.9, 3, 1)	1	0	0.406256	higher
47	structural connectivity	metabolism	cmrglc	syn	0.466073	0.0649781	-0.362743	29999	(0.01, 3, 1)	0	0	0.406256	higher
48	structural connectivity	Cortical expansion	scalingnih	spread	0.464717	0.0374345	0.0488858	2909	(0.9, 3, 0.1)	0	0	0.406256	higher
49	structural connectivity	Celltype	Oligo	clear	0.464022	0.0329021	0.0698518	29999	(0.1, 1.5, 0.3)	1	0	0.406256	higher
50	structural connectivity	AD-realted	APOE	clear	0.463065	0.0428106	0.0780148	29999	(0.5, 3, 1)	1	0	0.406256	higher
51	structural connectivity	Receptors	5HT1b	syn	0.454795	0.0537607	-0.31956	29999	(0.01, 3, 1)	0	0	0.406256	higher
52	structural connectivity	Celltype	Astro	syn	0.448826	0.0773604	-0.334822	238	(0.9, 1.5, 1)	0	0	0.406256	higher
53	structural connectivity	Celltype	Astro	mis	0.44842	0.0749133	-0.539006	613	(0.05, 3, 0.7)	0	0	0.406256	higher
54	structural connectivity	metabolism	cmr02	clear	0.444789	0.0392163	-0.00371863	29999	(0.7, 3, 1)	1	0	0.406256	higher
55	structural connectivity	Receptors	mGluR5	spread	0.443808	0.0323159	-0.0190856	476	(0.9, 3, 1)	1	0	0.406256	higher
56	structural connectivity	Receptors	NET	clear	0.438964	0.0373532	0.0177863	129	(0.7, 3, 1)	1	0	0.406256	higher
57	structural connectivity	Celltype	Micro	spread	0.438839	0.0334241	0.0113889	559	(0.9, 2.9, 1)	1	0	0.406256	higher
58	structural connectivity	AD-realted	Abeta	mis	0.427736	0.0864744	-1.15254	120	(0.9, 3, 0.5)	0	0	0.406256	higher
59	structural connectivity	Cortical expansion	scalingpnc	syn	0.426453	0.0449727	0.0312545	178	(0.9, 3, 0.3)	0	0	0.406256	higher
60	structural connectivity	metabolism	cmr02	syn	0.425341	0.0651154	-0.525096	29999	(0.01, 3, 1)	0	0	0.406256	higher
61	structural connectivity	AD-realted	Cluster6	clear	0.417479	0.0377923	-0.00649687	440	(0.9, 2.5, 1)	1	0	0.406256	higher
62	structural connectivity	AD-realted	Cluster5	syn	0.417479	0.0377923	-0.00649687	440	(0.9, 2.5, 1)	1	0	0.406256	higher
63	structural connectivity	AD-realted	Cluster5	spread	0.417479	0.0377923	-0.00649687	440	(0.9, 2.5, 1)	0	0	0.406256	higher
64	structural connectivity	AD-realted	Cluster5	mis	0.417479	0.0377923	-0.00649687	440	(0.9, 2.5, 1)	0	0	0.406256	higher
65	structural connectivity	AD-realted	Cluster2	clear	0.417479	0.0377923	-0.00649687	440	(0.9, 2.5, 1)	0	0	0.406256	higher
66	structural connectivity	AD-realted	Cluster3	clear	0.417479	0.0377923	-0.00649687	440	(0.9, 2.5, 1)	1	0	0.406256	higher
67	structural connectivity	AD-realted	Cluster2	mis	0.417479	0.0377923	-0.00649687	440	(0.9, 2.5, 1)	0	0	0.406256	higher
68	structural connectivity	AD-realted	Cluster2	spread	0.417479	0.0377923	-0.00649687	440	(0.9, 2.5, 1)	0	0	0.406256	higher
69	structural connectivity	AD-realted	Cluster2	syn	0.417479	0.0377923	-0.00649687	440	(0.9, 2.5, 1)	1	0	0.406256	higher
70	structural connectivity	AD-realted	Cluster5	clear	0.417479	0.0377923	-0.00649687	440	(0.9, 2.5, 1)	0	0	0.406256	higher
71	structural connectivity	AD-realted	Cluster7	syn	0.417479	0.0377923	-0.00649689	440	(0.9, 2.5, 1)	1	0	0.406256	higher
72	structural connectivity	AD-realted	Cluster6	syn	0.417479	0.0377923	-0.00649689	440	(0.9, 2.5, 1)	0	0	0.406256	higher
73	structural connectivity	AD-realted	Cluster6	mis	0.417479	0.0377923	-0.00649689	440	(0.9, 2.5, 1)	0	0	0.406256	higher
74	structural connectivity	AD-realted	Cluster6	spread	0.417479	0.0377923	-0.00649689	440	(0.9, 2.5, 1)	0	0	0.406256	higher
75	structural connectivity	AD-realted	Cluster7	spread	0.417479	0.0377923	-0.00649689	440	(0.9, 2.5, 1)	0	0	0.406256	higher
76	structural connectivity	AD-realted	Cluster7	mis	0.417479	0.0377923	-0.00649689	440	(0.9, 2.5, 1)	0	0	0.406256	higher
77	structural connectivity	AD-realted	Cluster4	spread	0.417479	0.0377923	-0.00649689	440	(0.9, 2.5, 1)	0	0	0.406256	higher
78	structural connectivity	AD-realted	Cluster4	clear	0.417479	0.0377923	-0.00649689	440	(0.9, 2.5, 1)	0	0	0.406256	higher
79	structural connectivity	AD-realted	Cluster4	mis	0.417479	0.0377923	-0.00649689	440	(0.9, 2.5, 1)	0	0	0.406256	higher
80	structural connectivity	AD-realted	Cluster4	syn	0.417479	0.0377923	-0.00649689	440	(0.9, 2.5, 1)	1	0	0.406256	higher
81	structural connectivity	AD-realted	Cluster3	mis	0.417479	0.0377923	-0.00649689	440	(0.9, 2.5, 1)	0	0	0.406256	higher
82	structural connectivity	AD-realted	Cluster3	spread	0.417479	0.0377923	-0.00649689	440	(0.9, 2.5, 1)	0	0	0.406256	higher
83	structural connectivity	AD-realted	Cluster3	syn	0.417479	0.0377923	-0.00649689	440	(0.9, 2.5, 1)	0	0	0.406256	higher
84	structural connectivity	AD-realted	Cluster1	clear	0.417479	0.0377923	-0.00649689	440	(0.9, 2.5, 1)	0	0	0.406256	higher
85	structural connectivity	AD-realted	Cluster1	mis	0.417479	0.0377923	-0.00649689	440	(0.9, 2.5, 1)	0	0	0.406256	higher
86	structural connectivity	AD-realted	Cluster1	spread	0.417479	0.0377923	-0.00649689	440	(0.9, 2.5, 1)	0	0	0.406256	higher
87	structural connectivity	AD-realted	Cluster1	syn	0.417479	0.0377923	-0.00649689	440	(0.9, 2.5, 1)	1	0	0.406256	higher
88	structural connectivity				0.417479	0.0377923	-0.00649689	440	(0.9, 2.5, 1)	0	1	0.406256	higher
89	structural connectivity	AD-realted	Cluster7	clear	0.417479	0.0377923	-0.00649689	440	(0.9, 2.5, 1)	0	0	0.406256	higher
90	structural connectivity	Receptors	D1	spread	0.413787	0.0316628	-0.097913	486	(0.9, 2.9, 1)	1	0	0.406256	higher
91	structural connectivity	Receptors	GABAa	clear	0.413436	0.0378276	-0.066125	125	(0.9, 3, 1)	1	0	0.406256	higher
92	structural connectivity	Receptors	5HT6	spread	0.409978	0.0365264	-0.1147	348	(0.9, 3, 1)	1	0	0.406256	higher
93	structural connectivity	Receptors	A4B2	clear	0.405518	0.0569533	-0.0531755	77	(0.7, 3, 1)	1	0	0.406256	lower
94	structural connectivity	Receptors	5HTT	syn	0.405368	0.0336308	-0.408786	29999	(0.01, 0.9, 0.3)	1	0	0.406256	lower
95	structural connectivity	Receptors	A4B2	syn	0.403905	0.0627045	-0.495471	29999	(0.01, 3, 1)	0	0	0.406256	lower
96	structural connectivity	Receptors	NET	syn	0.401175	0.0577817	-0.433994	29999	(0.01, 3, 1)	0	0	0.406256	lower
97	structural connectivity	Receptors	DAT	spread	0.399762	0.0356386	-0.0974975	465	(0.9, 2.9, 1)	1	0	0.406256	lower
98	structural connectivity	Receptors	M1	spread	0.399738	0.033679	-0.187088	337	(0.9, 3, 0.9)	1	0	0.406256	lower
99	structural connectivity	AD-realted	APOE	syn	0.385855	0.0698031	-0.540425	29811	(0.01, 3, 1)	0	0	0.406256	lower
100	structural connectivity	Microstructure	genepc1	clear	0.383232	0.0587695	-0.130181	29999	(0.7, 3, 1)	1	0	0.406256	lower
101	structural connectivity	Receptors	A4B2	spread	0.382316	0.0377939	-0.214577	365	(0.9, 3, 0.9)	0	0	0.406256	lower
102	structural connectivity	Receptors	H3	spread	0.380781	0.0467629	-0.147898	335	(0.9, 3, 1)	1	0	0.406256	lower
103	structural connectivity	Microstructure	myelinmap	clear	0.376408	0.0517089	-0.0819268	29999	(0.9, 3, 1)	1	0	0.406256	lower
104	structural connectivity	Celltype	Neuro-Ex	spread	0.374213	0.0302922	-0.451927	365	(0.9, 3, 1)	1	0	0.406256	lower
105	structural connectivity	Celltype	Neuro-In	spread	0.374059	0.0291995	-0.431823	385	(0.9, 3, 0.9)	1	0	0.406256	lower
106	structural connectivity	Receptors	NET	spread	0.367203	0.0364774	-0.26927	312	(0.9, 3, 1)	0	0	0.406256	lower
107	structural connectivity	metabolism	cbv	spread	0.365184	0.0377373	-0.1789	314	(0.9, 3, 1)	1	0	0.406256	lower
108	structural connectivity	Receptors	GABAa	spread	0.363686	0.0389205	-0.227008	305	(0.9, 3, 1)	0	0	0.406256	lower
109	structural connectivity	Celltype	Endo	syn	0.362999	0.0385529	-0.495475	29999	(0.01, 0.9, 0.3)	1	0	0.406256	lower
110	structural connectivity	Receptors	H3	clear	0.362288	0.0554911	-0.0335077	80	(0.7, 3, 1)	0	0	0.406256	lower
111	structural connectivity	Receptors	VAChT	spread	0.361236	0.0362587	-0.28949	343	(0.9, 3, 1)	0	0	0.406256	lower
112	structural connectivity	Receptors	NMDA	spread	0.35726	0.0355766	-0.256059	346	(0.9, 3, 1)	1	0	0.406256	lower
113	structural connectivity	Microstructure	myelinmap	spread	0.346487	0.0490911	-0.229038	203	(0.9, 3, 1)	0	0	0.406256	lower
114	structural connectivity	AD-realted	APOE	spread	0.343959	0.0413901	-0.281221	218	(0.9, 3, 1)	0	0	0.406256	lower
115	structural connectivity	Microstructure	genepc1	syn	0.343671	0.0662002	-0.743901	29999	(0.01, 3, 1)	0	0	0.406256	lower
116	structural connectivity	Receptors	5HT1b	spread	0.343585	0.042235	-0.308566	282	(0.9, 3, 0.9)	0	0	0.406256	lower
117	structural connectivity	Microstructure	genepc1	spread	0.340924	0.0368972	-0.266097	279	(0.9, 3, 1)	0	0	0.406256	lower
118	structural connectivity	Receptors	M1	syn	0.33895	0.0588306	-0.489707	29999	(0.01, 3, 1)	0	0	0.406256	lower
119	structural connectivity	Receptors	5HTT	spread	0.336843	0.0377873	-0.311195	321	(0.9, 3, 1)	0	0	0.406256	lower
120	structural connectivity	metabolism	cmrglc	spread	0.33526	0.0440509	-0.306115	211	(0.9, 3, 1)	0	0	0.406256	lower
121	structural connectivity	metabolism	cmr02	spread	0.334942	0.046554	-0.283988	206	(0.9, 3, 1)	0	0	0.406256	lower
122	structural connectivity	Cortical expansion	scalingpnc	mis	0.333164	0.0497034	-0.482584	29999	(0.01, 1, 0.9)	0	0	0.406256	lower
123	structural connectivity	Celltype	Oligo	spread	0.3317	0.0420279	-0.258328	349	(0.9, 3, 1)	0	0	0.406256	lower
124	structural connectivity	Celltype	Oligo	syn	0.329257	0.0467454	-0.607049	29999	(0.01, 0.9, 0.3)	0	0	0.406256	lower
125	structural connectivity	Celltype	Endo	spread	0.324323	0.0503627	-0.327066	201	(0.9, 3, 1)	0	0	0.406256	lower
126	structural connectivity	Receptors	H3	syn	0.319069	0.0560988	-0.772606	29999	(0.01, 3, 1)	0	0	0.406256	lower
127	structural connectivity	Celltype	Endo	clear	0.318923	0.0753638	-0.528723	544	(0.9, 0.1, 0.1)	0	0	0.406256	lower
128	structural connectivity	Receptors	5HTT	clear	0.317185	0.0667169	-0.121484	94	(0.9, 3, 0.1)	0	0	0.406256	lower
129	structural connectivity	Celltype	Neuro-Ex	syn	0.315984	0.0552593	-0.473379	5655	(0.3, 2, 0.1)	0	0	0.406256	lower
130	structural connectivity	Receptors	GABAa	syn	0.314318	0.057996	-0.872071	29999	(0.01, 3, 1)	0	0	0.406256	lower
131	structural connectivity	Microstructure	myelinmap	syn	0.29416	0.0643083	-0.786935	21503	(0.01, 3, 1)	0	0	0.406256	lower
132	structural connectivity	metabolism	cbf	spread	0.293492	0.0629647	-0.391869	283	(0.9, 3, 0.1)	0	0	0.406256	lower
133	structural connectivity	Celltype	Neuro-Ex	mis	0.286134	0.0750255	-0.823954	9848	(0.3, 2.9, 0.1)	0	0	0.406256	lower
134	structural connectivity	Celltype	Neuro-Ex	clear	0.280767	0.0523662	-0.751631	29999	(0.01, 0.5, 0.9)	0	0	0.406256	lower
135	structural connectivity	Receptors	CB1	syn	0.279882	0.054115	-0.132759	282	(0.9, 3, 0.1)	0	0	0.406256	lower
136	structural connectivity	Receptors	DAT	syn	0.275251	0.0666027	-0.877562	19053	(0.01, 1.5, 0.1)	0	0	0.406256	lower
137	structural connectivity	Receptors	5HT6	syn	0.272205	0.0626402	-0.919091	29999	(0.01, 3, 1)	0	0	0.406256	lower
138	structural connectivity	Celltype	Neuro-In	mis	0.27143	0.0752852	-0.765677	3394	(0.9, 1, 1)	0	0	0.406256	lower
139	structural connectivity	Receptors	CB1	mis	0.264312	0.0613222	-1.22361	29999	(0.01, 1, 1)	0	0	0.406256	lower
140	structural connectivity	Celltype	Micro	mis	0.261027	0.0449848	-0.737343	23041	(0.01, 1.5, 0.5)	0	0	0.406256	lower
141	structural connectivity	Celltype	Neuro-In	clear	0.260449	0.0500406	-0.812329	29999	(0.01, 0.5, 0.5)	0	0	0.406256	lower
142	structural connectivity	Receptors	VAChT	syn	0.259938	0.0433999	-1.48345	23987	(0.01, 0.9, 0.5)	0	0	0.406256	lower
143	structural connectivity	Celltype	Neuro-In	syn	0.256384	0.0712818	-0.905322	11927	(0.01, 2, 0.1)	0	0	0.406256	lower
144	structural connectivity	Receptors	M1	clear	0.24457	0.0717874	-0.51949	16018	(0.01, 0.9, 0.1)	0	0	0.406256	lower
145	structural connectivity	Receptors	5HT6	clear	0.237447	0.0618803	-0.360895	93	(0.7, 3, 1)	0	0	0.406256	lower
146	structural connectivity	Celltype	Micro	syn	0.235863	0.0694057	-0.985046	13957	(0.01, 2, 0.1)	0	0	0.406256	lower
147	structural connectivity	metabolism	cbv	syn	0.235559	0.0519027	-1.06008	27726	(0.01, 0.9, 0.3)	0	0	0.406256	lower
148	structural connectivity	Receptors	NMDA	clear	0.230776	0.0752757	-1.16266	29999	(0.05, 0.5, 0.1)	0	0	0.406256	lower
149	structural connectivity	Receptors	M1	mis	0.230535	0.0633604	-1.20753	29999	(0.01, 1, 1)	0	0	0.406256	lower
150	structural connectivity	Receptors	mGluR5	clear	0.223723	0.0866922	-1.0222	16186	(0.01, 0.5, 0.1)	0	0	0.406256	lower
151	structural connectivity	Receptors	NMDA	syn	0.223722	0.0587901	-1.35688	17401	(0.01, 0.9, 0.5)	0	0	0.406256	lower
152	structural connectivity	Receptors	5HT2a	clear	0.219865	0.0881483	-0.95654	20105	(0.01, 0.5, 0.1)	0	0	0.406256	lower
153	structural connectivity	AD-realted	Abeta	clear	0.211627	0.0914652	-1.02991	29999	(0.01, 0.1, 0.1)	0	0	0.406256	lower
154	structural connectivity	Receptors	D1	mis	0.211309	0.0876915	-1.09724	21257	(0.01, 1.9, 0.1)	0	0	0.406256	lower
155	structural connectivity	Receptors	MOR	mis	0.210334	0.0930487	-1.20287	29999	(0.01, 1.5, 0.1)	0	0	0.406256	lower
156	structural connectivity	Cortical expansion	scalingpnc	clear	0.209887	0.0941554	-1.11465	29999	(0.01, 0.1, 0.1)	0	0	0.406256	lower
157	structural connectivity	Cortical expansion	devexp	clear	0.209754	0.0915008	-1.04559	29999	(0.01, 0.1, 0.1)	0	0	0.406256	lower
158	structural connectivity	Receptors	DAT	mis	0.204781	0.0911235	-1.13068	29999	(0.01, 1.5, 0.1)	0	0	0.406256	lower
159	structural connectivity	Receptors	D1	clear	0.202721	0.0922443	-1.22385	17848	(0.01, 0.5, 0.1)	0	0	0.406256	lower
160	structural connectivity	Receptors	mGluR5	mis	0.202423	0.0931769	-1.12958	29999	(0.01, 1.5, 0.1)	0	0	0.406256	lower
161	structural connectivity	Cortical expansion	scaling	clear	0.200285	0.0961861	-1.17546	29999	(0.01, 0.1, 0.1)	0	0	0.406256	lower
162	structural connectivity	Receptors	D2	clear	0.200157	0.101762	-1.40984	143	(0.7, 1, 0.1)	0	0	0.406256	lower
163	structural connectivity	Receptors	NMDA	mis	0.199902	0.0941824	-1.1537	15648	(0.01, 1.9, 0.1)	0	0	0.406256	lower
164	structural connectivity	Receptors	5HT6	mis	0.199241	0.0931946	-1.108	24529	(0.01, 1.5, 0.1)	0	0	0.406256	lower
165	structural connectivity	metabolism	cbv	clear	0.19919	0.0949135	-1.15816	29999	(0.01, 0.5, 0.1)	0	0	0.406256	lower
166	structural connectivity	metabolism	cbv	mis	0.198534	0.0930823	-1.10603	13152	(0.01, 1.9, 0.1)	0	0	0.406256	lower
167	structural connectivity	Cortical expansion	scalingnih	clear	0.19756	0.0967929	-1.19061	29999	(0.01, 0.1, 0.1)	0	0	0.406256	lower
168	structural connectivity	Cortical expansion	evoexp	clear	0.196973	0.0948646	-1.09637	29999	(0.01, 0.1, 0.1)	0	0	0.406256	lower
169	structural connectivity	Celltype	Micro	clear	0.194519	0.0958791	-1.10031	17892	(0.01, 0.5, 0.1)	0	0	0.406256	lower
170	structural connectivity	Celltype	Endo	mis	0.192872	0.0897172	-1.13674	18486	(0.01, 1.9, 0.1)	0	0	0.406256	lower
171	structural connectivity	Microstructure	myelinmap	mis	0.192373	0.0951764	-1.10916	22159	(0.01, 1, 0.1)	0	0	0.406256	lower
172	structural connectivity	Receptors	CB1	clear	0.192061	0.096522	-1.1414	26488	(0.01, 0.1, 0.1)	0	0	0.406256	lower
173	structural connectivity	Cortical expansion	scalinghcp	clear	0.191642	0.0977997	-1.19181	29999	(0.01, 0.1, 0.1)	0	0	0.406256	lower
174	structural connectivity	Receptors	A4B2	mis	0.190787	0.0988233	-1.12288	29999	(0.01, 0.5, 0.1)	0	0	0.406256	lower
175	structural connectivity	Microstructure	genepc1	mis	0.190568	0.0961524	-1.11119	21442	(0.01, 0.9, 0.1)	0	0	0.406256	lower
176	structural connectivity	Receptors	NET	mis	0.190324	0.098277	-1.12818	29999	(0.01, 0.5, 0.1)	0	0	0.406256	lower
177	structural connectivity	Receptors	H3	mis	0.190205	0.0991784	-1.12599	29999	(0.01, 0.1, 0.1)	0	0	0.406256	lower
178	structural connectivity	Receptors	VAChT	mis	0.190161	0.0992127	-1.13136	29999	(0.01, 0.1, 0.1)	0	0	0.406256	lower
179	structural connectivity	Receptors	5HTT	mis	0.190032	0.0990948	-1.12639	29999	(0.01, 0.1, 0.1)	0	0	0.406256	lower
180	structural connectivity	Receptors	GABAa	mis	0.190016	0.0968316	-1.12167	25086	(0.01, 0.9, 0.1)	0	0	0.406256	lower
181	structural connectivity	Receptors	5HT1b	mis	0.18987	0.0990924	-1.12726	29999	(0.01, 0.1, 0.1)	0	0	0.406256	lower
182	structural connectivity	metabolism	cbf	mis	0.189702	0.0991324	-1.12676	29999	(0.01, 0.1, 0.1)	0	0	0.406256	lower
183	structural connectivity	metabolism	cmrglc	mis	0.189606	0.0977403	-1.13004	29999	(0.01, 0.5, 0.1)	0	0	0.406256	lower
184	structural connectivity	AD-realted	APOE	mis	0.189309	0.0966216	-1.12757	22212	(0.01, 0.9, 0.1)	0	0	0.406256	lower
185	structural connectivity	Celltype	Oligo	mis	0.189255	0.0971608	-1.14442	29999	(0.01, 1, 0.1)	0	0	0.406256	lower
186	structural connectivity	metabolism	cmr02	mis	0.188951	0.0964566	-1.13156	21062	(0.01, 0.9, 0.1)	0	0	0.406256	lower
187	structural connectivity	Receptors	MOR	clear	0.185233	0.0976182	-1.13568	29999	(0.01, 0.1, 0.1)	0	0	0.406256	lower
188	structural connectivity	Celltype	Astro	clear	0.184342	0.0975043	-1.15553	18033	(0.01, 0.5, 0.1)	0	0	0.406256	lower
189	structural connectivity	Receptors	5HT4	clear	0.183478	0.0985576	-1.14282	27003	(0.01, 0.1, 0.1)	0	0	0.406256	lower
190	structural connectivity	Celltype	OPC	clear	0.182687	0.0973034	-1.15027	15493	(0.01, 0.5, 0.1)	0	0	0.406256	lower
191	structural connectivity	Receptors	DAT	clear	0.182551	0.097762	-1.21518	18683	(0.01, 0.5, 0.1)	0	0	0.406256	lower
192	structural connectivity	Receptors	D1	syn	0.181997	0.0910795	-1.39775	2359	(0.01, 1.5, 0.5)	0	0	0.406256	lower
193	structural connectivity	Receptors	MOR	syn	0.17698	0.0924875	-1.17935	2555	(0.01, 1.5, 0.3)	0	0	0.406256	lower
194	structural connectivity	AD-realted	MAPT	clear	0.170296	0.101879	-1.21002	29999	(0.01, 0.1, 0.1)	0	0	0.406256	lower
195	structural connectivity	Microstructure	thickness	clear	0.169911	0.102101	-1.21822	29755	(0.01, 0.1, 0.1)	0	0	0.406256	lower
196	structural connectivity	Receptors	5HT1a	clear	0.168973	0.102927	-1.20137	29999	(0.01, 0.1, 0.1)	0	0	0.406256	lower
197	structural connectivity	Receptors	mGluR5	syn	0.152504	0.100621	-1.44201	2046	(0.01, 0.9, 1)	0	0	0.406256	lower
1	functional connectivity	metabolism	cbf	clear	0.791221	0.0239141	0.608919	122	(0.3, 2.5, 0.5)	1	0	0.394049	higher
2	functional connectivity	AD-realted	MAPT	mis	0.755372	0.0258558	0.570506	1475	(0.9, 1.5, 0.1)	1	0	0.394049	higher
3	functional connectivity	Receptors	D2	syn	0.723716	0.0346219	0.430946	100	(0.5, 3, 0.7)	1	0	0.394049	higher
4	functional connectivity	Microstructure	thickness	syn	0.70956	0.0352915	0.491131	121	(0.5, 3, 0.3)	1	0	0.394049	higher
5	functional connectivity	AD-realted	Abeta	spread	0.708353	0.0275333	0.44362	14556	(0.3, 0.5, 0.1)	1	0	0.394049	higher
6	functional connectivity	AD-realted	MAPT	syn	0.705648	0.0210457	0.464773	363	(0.7, 1.5, 0.1)	0	0	0.394049	higher
7	functional connectivity	Receptors	5HT1a	spread	0.702502	0.0216902	0.461828	248	(0.9, 1.9, 1)	1	0	0.394049	higher
8	functional connectivity	Receptors	5HT4	spread	0.697977	0.0225028	0.443398	237	(0.9, 2, 1)	1	0	0.394049	higher
9	functional connectivity	metabolism	cmr02	clear	0.694778	0.0469675	0.261449	79	(0.01, 1.9, 1)	1	0	0.394049	higher
10	functional connectivity	Receptors	D2	spread	0.69178	0.0349886	0.407419	535	(0.9, 0.9, 1)	0	0	0.394049	higher
11	functional connectivity	Receptors	5HT4	syn	0.683938	0.0286923	0.453956	163	(0.7, 3, 0.1)	0	0	0.394049	higher
12	functional connectivity	AD-realted	MAPT	spread	0.683258	0.0231311	0.457709	772	(0.9, 3, 0.1)	0	0	0.394049	higher
13	functional connectivity	Receptors	5HT4	mis	0.677588	0.0329971	0.449191	233	(0.9, 3, 0.3)	0	0	0.394049	higher
14	functional connectivity	Microstructure	thickness	spread	0.676756	0.0281036	0.427478	221	(0.9, 2, 1)	0	0	0.394049	higher
15	functional connectivity	AD-realted	APOE	clear	0.669828	0.0257415	0.425547	124	(0.3, 3, 1)	1	0	0.394049	higher
16	functional connectivity	Receptors	D2	mis	0.667065	0.0474889	0.405259	199	(0.9, 2.5, 1)	0	0	0.394049	higher
17	functional connectivity	Receptors	CB1	spread	0.658012	0.0295086	0.372924	212	(0.9, 2, 1)	1	0	0.394049	higher
18	functional connectivity	Cortical expansion	scalinghcp	syn	0.657717	0.0439237	0.37314	84	(0.9, 3, 1)	1	0	0.394049	higher
19	functional connectivity	Receptors	5HT1a	mis	0.656221	0.0230666	0.410076	1549	(0.7, 3, 0.1)	0	0	0.394049	higher
20	functional connectivity	Receptors	MOR	spread	0.655067	0.0215108	0.384045	249	(0.9, 2, 0.7)	1	0	0.394049	higher
21	functional connectivity	Receptors	5HT1a	syn	0.654195	0.0320877	0.266643	139	(0.5, 3, 0.3)	0	0	0.394049	higher
22	functional connectivity	Receptors	D1	spread	0.649779	0.0317434	0.353212	215	(0.9, 2, 1)	1	0	0.394049	higher
23	functional connectivity	Microstructure	thickness	mis	0.647041	0.0526608	0.270634	140	(0.7, 2, 1)	0	0	0.394049	higher
24	functional connectivity	Receptors	5HT6	spread	0.64027	0.0440596	0.114354	274	(0.9, 1, 1)	1	0	0.394049	higher
25	functional connectivity	Cortical expansion	scalingnih	syn	0.632419	0.0430375	0.361149	105	(0.9, 3, 0.5)	1	0	0.394049	higher
26	functional connectivity	metabolism	cmrglc	clear	0.632002	0.0349288	0.280479	81	(0.3, 3, 0.9)	1	0	0.394049	higher
27	functional connectivity	Receptors	5HT2a	spread	0.631886	0.047305	0.245008	19658	(0.7, 0.1, 0.1)	1	0	0.394049	higher
28	functional connectivity	Cortical expansion	scaling	syn	0.63038	0.0433086	0.373186	121	(0.9, 3, 0.1)	1	0	0.394049	higher
29	functional connectivity	Cortical expansion	scalinghcp	mis	0.625684	0.0524304	0.295896	204	(0.9, 3, 0.1)	0	0	0.394049	higher
30	functional connectivity	Receptors	DAT	spread	0.620899	0.0357737	0.255402	459	(0.9, 1.5, 0.1)	1	0	0.394049	higher
31	functional connectivity	Receptors	mGluR5	spread	0.607118	0.0322671	0.256883	234	(0.9, 2, 0.5)	1	0	0.394049	higher
32	functional connectivity	Cortical expansion	evoexp	spread	0.601626	0.0271884	0.290129	262	(0.9, 2, 0.3)	1	0	0.394049	higher
33	functional connectivity	Cortical expansion	devexp	syn	0.600853	0.0633866	0.250344	89	(0.9, 3, 0.3)	1	0	0.394049	higher
34	functional connectivity	Cortical expansion	scaling	spread	0.596849	0.0355207	0.30316	238	(0.9, 2, 0.3)	0	0	0.394049	higher
35	functional connectivity	Cortical expansion	devexp	spread	0.596542	0.028309	0.269247	260	(0.9, 2, 0.3)	0	0	0.394049	higher
36	functional connectivity	Cortical expansion	devexp	mis	0.594558	0.0710137	0.0976857	105	(0.9, 3, 0.1)	0	0	0.394049	higher
37	functional connectivity	Cortical expansion	scalingnih	spread	0.594091	0.0373101	0.301379	250	(0.9, 1.9, 0.3)	0	0	0.394049	higher
38	functional connectivity	Cortical expansion	scalinghcp	spread	0.591388	0.0376951	0.287035	235	(0.9, 2, 0.3)	0	0	0.394049	higher
39	functional connectivity	Cortical expansion	scalingpnc	spread	0.590679	0.0334553	0.277147	241	(0.9, 2, 0.3)	1	0	0.394049	higher
40	functional connectivity	Microstructure	genepc1	clear	0.582761	0.0697641	0.020734	41	(0.01, 3, 1)	1	0	0.394049	higher
41	functional connectivity	Receptors	NET	clear	0.581955	0.0295963	0.212596	100	(0.3, 3, 0.5)	1	0	0.394049	higher
42	functional connectivity	Celltype	Astro	spread	0.579668	0.0268236	0.203104	249	(0.9, 1.9, 0.5)	1	0	0.394049	higher
43	functional connectivity	Receptors	5HT1b	clear	0.573646	0.0339777	0.184038	261	(0.1, 3, 0.1)	1	0	0.394049	higher
44	functional connectivity	Celltype	OPC	spread	0.573018	0.0249875	0.220539	279	(0.9, 1.9, 0.3)	1	0	0.394049	higher
45	functional connectivity	Receptors	GABAa	spread	0.571031	0.0522497	0.0607442	3877	(0.9, 0.1, 1)	1	0	0.394049	higher
46	functional connectivity	Microstructure	myelinmap	clear	0.569792	0.0570655	0.1429	43	(0.1, 3, 1)	1	0	0.394049	higher
47	functional connectivity	AD-realted	Abeta	syn	0.567904	0.0390339	0.230622	115	(0.7, 3, 0.5)	0	0	0.394049	higher
48	functional connectivity	Receptors	NMDA	spread	0.566671	0.0448014	0.16895	421	(0.9, 1.5, 0.1)	1	0	0.394049	higher
49	functional connectivity	Cortical expansion	scalingnih	mis	0.562948	0.0450802	0.229876	268	(0.9, 3, 0.1)	0	0	0.394049	higher
50	functional connectivity	Receptors	CB1	syn	0.562637	0.0420448	0.150547	74	(0.7, 1.9, 1)	0	0	0.394049	higher
51	functional connectivity	Cortical expansion	scaling	mis	0.561594	0.0439864	0.264591	264	(0.9, 3, 0.1)	0	0	0.394049	higher
52	functional connectivity	Receptors	M1	spread	0.558658	0.0437971	0.130407	240	(0.9, 1.9, 0.3)	1	0	0.394049	higher
53	functional connectivity	Receptors	VAChT	clear	0.554783	0.0642558	-0.0855074	133	(0.7, 0.5, 0.3)	1	0	0.394049	higher
54	functional connectivity				0.553665	0.032767	0.124779	222	(0.9, 2, 0.3)	0	1	0.394049	higher
55	functional connectivity	AD-realted	Cluster1	syn	0.553665	0.032767	0.124779	222	(0.9, 2, 0.3)	1	0	0.394049	higher
56	functional connectivity	AD-realted	Cluster4	clear	0.553665	0.032767	0.124779	222	(0.9, 2, 0.3)	0	0	0.394049	higher
57	functional connectivity	AD-realted	Cluster7	mis	0.553665	0.032767	0.124779	222	(0.9, 2, 0.3)	0	0	0.394049	higher
58	functional connectivity	AD-realted	Cluster7	spread	0.553665	0.032767	0.124779	222	(0.9, 2, 0.3)	0	0	0.394049	higher
59	functional connectivity	AD-realted	Cluster7	syn	0.553665	0.032767	0.124779	222	(0.9, 2, 0.3)	1	0	0.394049	higher
60	functional connectivity	AD-realted	Cluster6	clear	0.553665	0.032767	0.124779	222	(0.9, 2, 0.3)	0	0	0.394049	higher
61	functional connectivity	AD-realted	Cluster6	mis	0.553665	0.032767	0.124779	222	(0.9, 2, 0.3)	0	0	0.394049	higher
62	functional connectivity	AD-realted	Cluster6	spread	0.553665	0.032767	0.124779	222	(0.9, 2, 0.3)	0	0	0.394049	higher
63	functional connectivity	AD-realted	Cluster6	syn	0.553665	0.032767	0.124779	222	(0.9, 2, 0.3)	1	0	0.394049	higher
64	functional connectivity	AD-realted	Cluster5	clear	0.553665	0.032767	0.124779	222	(0.9, 2, 0.3)	0	0	0.394049	higher
65	functional connectivity	AD-realted	Cluster5	mis	0.553665	0.032767	0.124779	222	(0.9, 2, 0.3)	0	0	0.394049	higher
66	functional connectivity	AD-realted	Cluster5	spread	0.553665	0.032767	0.124779	222	(0.9, 2, 0.3)	0	0	0.394049	higher
67	functional connectivity	AD-realted	Cluster5	syn	0.553665	0.032767	0.124779	222	(0.9, 2, 0.3)	1	0	0.394049	higher
68	functional connectivity	AD-realted	Cluster4	mis	0.553665	0.032767	0.124779	222	(0.9, 2, 0.3)	0	0	0.394049	higher
69	functional connectivity	AD-realted	Cluster1	spread	0.553665	0.032767	0.124779	222	(0.9, 2, 0.3)	0	0	0.394049	higher
70	functional connectivity	AD-realted	Cluster4	spread	0.553665	0.032767	0.124779	222	(0.9, 2, 0.3)	0	0	0.394049	higher
71	functional connectivity	AD-realted	Cluster4	syn	0.553665	0.032767	0.124779	222	(0.9, 2, 0.3)	1	0	0.394049	higher
72	functional connectivity	AD-realted	Cluster3	clear	0.553665	0.032767	0.124779	222	(0.9, 2, 0.3)	0	0	0.394049	higher
73	functional connectivity	AD-realted	Cluster3	mis	0.553665	0.032767	0.124779	222	(0.9, 2, 0.3)	0	0	0.394049	higher
74	functional connectivity	AD-realted	Cluster3	spread	0.553665	0.032767	0.124779	222	(0.9, 2, 0.3)	0	0	0.394049	higher
75	functional connectivity	AD-realted	Cluster3	syn	0.553665	0.032767	0.124779	222	(0.9, 2, 0.3)	1	0	0.394049	higher
76	functional connectivity	AD-realted	Cluster2	clear	0.553665	0.032767	0.124779	222	(0.9, 2, 0.3)	0	0	0.394049	higher
77	functional connectivity	AD-realted	Cluster2	mis	0.553665	0.032767	0.124779	222	(0.9, 2, 0.3)	0	0	0.394049	higher
78	functional connectivity	AD-realted	Cluster2	spread	0.553665	0.032767	0.124779	222	(0.9, 2, 0.3)	0	0	0.394049	higher
79	functional connectivity	AD-realted	Cluster2	syn	0.553665	0.032767	0.124779	222	(0.9, 2, 0.3)	1	0	0.394049	higher
80	functional connectivity	AD-realted	Cluster1	clear	0.553665	0.032767	0.124779	222	(0.9, 2, 0.3)	0	0	0.394049	higher
81	functional connectivity	AD-realted	Cluster1	mis	0.553665	0.032767	0.124779	222	(0.9, 2, 0.3)	0	0	0.394049	higher
82	functional connectivity	AD-realted	Cluster7	clear	0.553665	0.032767	0.124779	222	(0.9, 2, 0.3)	0	0	0.394049	higher
83	functional connectivity	Receptors	H3	spread	0.55072	0.0345046	0.16454	270	(0.9, 1.9, 0.3)	1	0	0.394049	higher
84	functional connectivity	Receptors	5HT2a	syn	0.549797	0.0640112	0.130548	108	(0.9, 3, 0.1)	0	0	0.394049	higher
85	functional connectivity	AD-realted	Abeta	mis	0.542559	0.0292168	0.0860338	1552	(0.01, 1.5, 0.1)	0	0	0.394049	higher
86	functional connectivity	Receptors	5HT2a	mis	0.540878	0.0664343	0.103421	100	(0.9, 3, 0.1)	0	0	0.394049	higher
87	functional connectivity	Receptors	NET	spread	0.538928	0.0599325	-0.0374442	3835	(0.9, 0.1, 1)	0	0	0.394049	higher
88	functional connectivity	Cortical expansion	evoexp	syn	0.538369	0.0574906	0.14714	96	(0.9, 1.5, 1)	0	0	0.394049	higher
89	functional connectivity	Celltype	Micro	spread	0.534436	0.0319992	0.142716	242	(0.9, 2, 0.3)	1	0	0.394049	higher
90	functional connectivity	Receptors	CB1	mis	0.532245	0.0443814	0.0949123	67	(0.5, 3, 1)	0	0	0.394049	higher
91	functional connectivity	Receptors	A4B2	spread	0.530907	0.0544378	-0.224044	29999	(0.9, 0.1, 1)	1	0	0.394049	higher
92	functional connectivity	metabolism	cbv	spread	0.529864	0.0419179	0.16306	238	(0.9, 1.9, 0.3)	1	0	0.394049	higher
93	functional connectivity	Cortical expansion	evoexp	mis	0.521929	0.0649861	0.0548789	134	(0.9, 2.5, 0.1)	0	0	0.394049	higher
94	functional connectivity	Receptors	5HTT	spread	0.517407	0.0412271	0.0243681	449	(0.9, 1.5, 0.1)	1	0	0.394049	higher
95	functional connectivity	Celltype	Neuro-In	spread	0.515613	0.0448816	0.0654236	300	(0.9, 1.9, 0.1)	1	0	0.394049	higher
96	functional connectivity	Receptors	VAChT	spread	0.51354	0.031758	0.0272601	341	(0.9, 1.9, 0.1)	0	0	0.394049	higher
97	functional connectivity	Celltype	Neuro-Ex	spread	0.504879	0.0447131	0.0471784	299	(0.9, 1.9, 0.1)	1	0	0.394049	higher
98	functional connectivity	Cortical expansion	scalingpnc	syn	0.501152	0.0482712	0.152688	112	(0.9, 3, 0.3)	0	0	0.394049	higher
99	functional connectivity	Celltype	Endo	clear	0.498043	0.08581	-0.473351	27	(0.01, 3, 1)	1	0	0.394049	higher
100	functional connectivity	Receptors	MOR	syn	0.493895	0.0457059	0.0113815	65	(0.5, 2, 1)	0	0	0.394049	higher
101	functional connectivity	Celltype	Astro	syn	0.493199	0.0556599	-0.405222	49	(0.1, 3, 1)	0	0	0.394049	higher
102	functional connectivity	Receptors	DAT	syn	0.486325	0.0473306	-0.161151	52	(0.1, 2.9, 0.9)	0	0	0.394049	higher
103	functional connectivity	Celltype	OPC	syn	0.485287	0.0554304	-0.477984	57	(0.3, 2.5, 1)	0	0	0.394049	higher
104	functional connectivity	Receptors	M1	mis	0.47987	0.075938	-0.404519	77	(0.7, 2.5, 1)	0	0	0.394049	higher
105	functional connectivity	Receptors	M1	syn	0.478713	0.0686532	-0.138812	92	(0.7, 1.9, 0.7)	0	0	0.394049	higher
106	functional connectivity	Microstructure	myelinmap	spread	0.47758	0.0423414	-0.034158	297	(0.9, 1.9, 0.1)	0	0	0.394049	higher
107	functional connectivity	Receptors	5HT1b	spread	0.463919	0.0401748	-0.0553322	312	(0.9, 1.9, 0.1)	0	0	0.394049	higher
108	functional connectivity	metabolism	cmr02	spread	0.463488	0.0423566	-0.0500396	299	(0.9, 1.9, 0.1)	0	0	0.394049	higher
109	functional connectivity	Receptors	D1	syn	0.462172	0.0539471	-0.17325	53	(0.3, 3, 1)	0	0	0.394049	higher
110	functional connectivity	Receptors	A4B2	clear	0.457449	0.0500683	-0.169959	50	(0.9, 3, 1)	0	0	0.394049	higher
111	functional connectivity	AD-realted	APOE	spread	0.457375	0.0396952	-0.0928055	288	(0.9, 2, 0.1)	0	0	0.394049	higher
112	functional connectivity	Celltype	Oligo	clear	0.456263	0.0722208	-0.583192	44	(0.01, 1.5, 1)	1	0	0.394049	higher
113	functional connectivity	metabolism	cmrglc	spread	0.454041	0.0434282	-0.0933615	284	(0.9, 2, 0.1)	0	0	0.394049	higher
114	functional connectivity	Celltype	OPC	mis	0.453781	0.0717479	-0.438028	276	(0.3, 2.9, 0.1)	0	0	0.394049	higher
115	functional connectivity	Microstructure	genepc1	spread	0.450103	0.0433552	-0.101701	283	(0.9, 2, 0.1)	0	0	0.394049	higher
116	functional connectivity	Celltype	Astro	mis	0.450097	0.0732018	-0.419218	254	(0.3, 2.9, 0.1)	0	0	0.394049	higher
117	functional connectivity	Receptors	5HTT	syn	0.448395	0.0446993	-0.165746	47	(0.01, 2.9, 1)	0	0	0.394049	higher
118	functional connectivity	Celltype	Oligo	spread	0.446821	0.0452725	-0.0852954	313	(0.9, 1.9, 0.1)	0	0	0.394049	higher
119	functional connectivity	Celltype	Endo	spread	0.436655	0.0420562	-0.106778	287	(0.9, 2, 0.1)	0	0	0.394049	higher
120	functional connectivity	Receptors	NMDA	syn	0.426613	0.0476737	-0.1579	50	(0.3, 3, 1)	0	0	0.394049	higher
121	functional connectivity	Cortical expansion	scalingpnc	mis	0.421981	0.053415	-0.106369	118	(0.5, 1.5, 1)	0	0	0.394049	higher
122	functional connectivity	metabolism	cbv	syn	0.421004	0.0582146	-0.378637	44	(0.3, 3, 1)	0	0	0.394049	higher
123	functional connectivity	Receptors	GABAa	clear	0.420445	0.0425177	-0.26758	64	(0.9, 3, 1)	0	0	0.394049	higher
124	functional connectivity	metabolism	cbf	spread	0.413896	0.0456809	-0.298721	222	(0.9, 2.5, 0.1)	0	0	0.394049	higher
125	functional connectivity	Celltype	Micro	syn	0.412421	0.0501556	-0.220899	50	(0.3, 2.5, 1)	0	0	0.394049	higher
126	functional connectivity	Celltype	Endo	syn	0.40567	0.0458206	-0.217301	47	(0.01, 2.5, 1)	0	0	0.394049	higher
127	functional connectivity	Receptors	5HTT	clear	0.400206	0.061372	-0.024927	63	(0.9, 3, 0.1)	0	0	0.394049	higher
128	functional connectivity	Celltype	Oligo	syn	0.396709	0.0458013	-0.377357	63	(0.1, 1.9, 1)	0	0	0.394049	higher
129	functional connectivity	Receptors	H3	clear	0.392319	0.0459176	-0.197872	62	(0.9, 3, 0.5)	0	0	0.394049	lower
130	functional connectivity	Celltype	Neuro-Ex	syn	0.390182	0.0568265	-0.664367	55	(0.05, 1.9, 1)	0	0	0.394049	lower
131	functional connectivity	Celltype	Neuro-In	syn	0.384805	0.0572368	-0.712487	55	(0.01, 2, 1)	0	0	0.394049	lower
132	functional connectivity	Receptors	5HT6	mis	0.37395	0.0769853	-0.217146	61	(0.7, 3, 1)	0	0	0.394049	lower
133	functional connectivity	Celltype	Micro	clear	0.346773	0.0734981	-0.535193	31	(0.1, 3, 1)	0	0	0.394049	lower
134	functional connectivity	Receptors	MOR	mis	0.346487	0.0727555	-0.608128	67	(0.5, 3, 1)	0	0	0.394049	lower
135	functional connectivity	Receptors	NMDA	clear	0.322534	0.0602212	-0.484504	251	(0.01, 1, 0.1)	0	0	0.394049	lower
136	functional connectivity	Celltype	OPC	clear	0.317491	0.0739043	-0.580446	57	(0.5, 1, 1)	0	0	0.394049	lower
137	functional connectivity	Celltype	Micro	mis	0.314656	0.0563059	-0.499242	300	(0.1, 3, 0.1)	0	0	0.394049	lower
138	functional connectivity	Receptors	VAChT	syn	0.314603	0.0602594	-0.8919	48	(0.05, 3, 1)	0	0	0.394049	lower
139	functional connectivity	Celltype	Astro	clear	0.312016	0.0783375	-0.673922	63	(0.01, 1.5, 0.5)	0	0	0.394049	lower
140	functional connectivity	Celltype	Neuro-Ex	mis	0.3085	0.0713458	-0.750705	354	(0.01, 2.5, 0.1)	0	0	0.394049	lower
141	functional connectivity	Microstructure	myelinmap	syn	0.308442	0.0669947	-0.420765	44	(0.5, 3, 1)	0	0	0.394049	lower
142	functional connectivity	Receptors	mGluR5	mis	0.304947	0.0558011	-0.617418	738	(0.01, 2, 0.1)	0	0	0.394049	lower
143	functional connectivity	metabolism	cbv	clear	0.301526	0.0740997	-1.02578	75	(0.01, 1, 1)	0	0	0.394049	lower
144	functional connectivity	Celltype	Neuro-Ex	clear	0.296085	0.0708644	-0.393157	44	(0.01, 2, 1)	0	0	0.394049	lower
145	functional connectivity	Receptors	M1	clear	0.295765	0.0573086	-0.300347	61	(0.9, 3, 1)	0	0	0.394049	lower
146	functional connectivity	Receptors	D1	mis	0.294911	0.0814608	-0.529018	60	(0.5, 2.9, 1)	0	0	0.394049	lower
147	functional connectivity	Celltype	Neuro-In	mis	0.292799	0.0766243	-0.783413	272	(0.01, 2.9, 0.1)	0	0	0.394049	lower
148	functional connectivity	Receptors	NMDA	mis	0.292678	0.0716044	-0.64037	60	(0.5, 3, 1)	0	0	0.394049	lower
149	functional connectivity	metabolism	cbv	mis	0.289381	0.0822135	-0.654577	69	(0.7, 3, 0.7)	0	0	0.394049	lower
150	functional connectivity	Receptors	5HT6	syn	0.284273	0.0749171	-0.546896	63	(0.5, 3, 1)	0	0	0.394049	lower
151	functional connectivity	Receptors	5HT6	clear	0.277061	0.0482012	-0.490675	63	(0.9, 3, 1)	0	0	0.394049	lower
152	functional connectivity	Celltype	Neuro-In	clear	0.269228	0.0715252	-0.667392	416	(0.01, 0.9, 0.1)	0	0	0.394049	lower
153	functional connectivity	Cortical expansion	devexp	clear	0.267903	0.0880146	-0.856335	28	(0.01, 3, 1)	0	0	0.394049	lower
154	functional connectivity	Cortical expansion	evoexp	clear	0.267146	0.0947077	-0.894191	25	(0.3, 3, 1)	0	0	0.394049	lower
155	functional connectivity	Receptors	mGluR5	syn	0.265682	0.0703427	-0.681229	61	(0.1, 3, 1)	0	0	0.394049	lower
156	functional connectivity	Receptors	DAT	mis	0.258504	0.0826493	-0.771616	61	(0.3, 3, 1)	0	0	0.394049	lower
157	functional connectivity	Receptors	H3	syn	0.258471	0.0698634	-0.851901	53	(0.1, 3, 1)	0	0	0.394049	lower
158	functional connectivity	metabolism	cmr02	mis	0.241465	0.082632	-0.831104	56	(0.7, 3, 0.9)	0	0	0.394049	lower
159	functional connectivity	AD-realted	APOE	mis	0.239956	0.0868599	-0.980272	59	(0.7, 3, 0.7)	0	0	0.394049	lower
160	functional connectivity	metabolism	cmrglc	mis	0.237677	0.0864543	-0.928975	66	(0.5, 3, 0.5)	0	0	0.394049	lower
161	functional connectivity	Celltype	Endo	mis	0.230231	0.0752165	-0.889155	264	(0.01, 2.9, 0.1)	0	0	0.394049	lower
162	functional connectivity	metabolism	cmrglc	syn	0.228299	0.0867739	-1.34921	64	(0.3, 3, 1)	0	0	0.394049	lower
163	functional connectivity	Microstructure	genepc1	mis	0.223218	0.0848743	-0.883469	51	(0.7, 3, 1)	0	0	0.394049	lower
164	functional connectivity	Receptors	5HT2a	clear	0.222486	0.0968368	-1.20119	658	(0.5, 0.1, 0.1)	0	0	0.394049	lower
165	functional connectivity	metabolism	cbf	syn	0.220479	0.0791499	-0.311885	29999	(0.01, 0.9, 1)	0	0	0.394049	lower
166	functional connectivity	Microstructure	myelinmap	mis	0.216077	0.0869966	-1.19817	56	(0.7, 3, 0.9)	0	0	0.394049	lower
167	functional connectivity	Receptors	mGluR5	clear	0.21269	0.075245	-0.818609	42	(0.9, 3, 1)	0	0	0.394049	lower
168	functional connectivity	AD-realted	Abeta	clear	0.212226	0.0994458	-1.22887	470	(0.5, 0.1, 0.1)	0	0	0.394049	lower
169	functional connectivity	Receptors	D1	clear	0.206299	0.0909495	-1.34957	363	(0.01, 0.5, 0.1)	0	0	0.394049	lower
170	functional connectivity	Cortical expansion	scalingpnc	clear	0.206116	0.0976742	-1.21437	779	(0.01, 0.1, 0.1)	0	0	0.394049	lower
171	functional connectivity	Receptors	5HT1b	mis	0.20489	0.0891847	-1.03016	58	(0.7, 3, 0.9)	0	0	0.394049	lower
172	functional connectivity	Celltype	Oligo	mis	0.198403	0.0919786	-1.26522	306	(0.01, 2.5, 0.1)	0	0	0.394049	lower
173	functional connectivity	Receptors	5HT1b	syn	0.197412	0.072235	-0.407497	29999	(0.01, 0.9, 1)	0	0	0.394049	lower
174	functional connectivity	Receptors	DAT	clear	0.195978	0.087783	-0.852963	30	(0.01, 1.5, 1)	0	0	0.394049	lower
175	functional connectivity	metabolism	cmr02	syn	0.195125	0.0793321	-0.871306	57	(0.5, 3, 1)	0	0	0.394049	lower
176	functional connectivity	Cortical expansion	scaling	clear	0.193744	0.0996704	-1.20655	761	(0.01, 0.1, 0.1)	0	0	0.394049	lower
177	functional connectivity	Receptors	A4B2	mis	0.192906	0.0943404	-1.31479	561	(0.01, 1.5, 0.1)	0	0	0.394049	lower
178	functional connectivity	Receptors	GABAa	mis	0.192693	0.0955808	-1.26633	56	(0.7, 3, 1)	0	0	0.394049	lower
179	functional connectivity	Receptors	H3	mis	0.192252	0.0974912	-1.3004	556	(0.01, 1.5, 0.1)	0	0	0.394049	lower
180	functional connectivity	Microstructure	genepc1	syn	0.191745	0.0832223	-0.868794	49	(0.5, 3, 1)	0	0	0.394049	lower
181	functional connectivity	Cortical expansion	scalingnih	clear	0.189204	0.100122	-1.23327	879	(0.01, 0.1, 0.1)	0	0	0.394049	lower
182	functional connectivity	Receptors	NET	mis	0.18767	0.099077	-1.30024	504	(0.01, 0.9, 0.1)	0	0	0.394049	lower
183	functional connectivity	Receptors	CB1	clear	0.187655	0.101084	-1.3643	708	(0.01, 0.1, 0.1)	0	0	0.394049	lower
184	functional connectivity	Receptors	5HTT	mis	0.186976	0.0989417	-1.30181	441	(0.01, 1.5, 0.1)	0	0	0.394049	lower
185	functional connectivity	Receptors	VAChT	mis	0.18664	0.0989182	-1.27505	670	(0.01, 0.9, 0.1)	0	0	0.394049	lower
186	functional connectivity	metabolism	cbf	mis	0.185481	0.099606	-1.30529	707	(0.01, 0.5, 0.1)	0	0	0.394049	lower
187	functional connectivity	Cortical expansion	scalinghcp	clear	0.184625	0.101277	-1.23027	777	(0.01, 0.1, 0.1)	0	0	0.394049	lower
188	functional connectivity	Receptors	NET	syn	0.184258	0.0704531	-0.522487	29999	(0.01, 0.9, 1)	0	0	0.394049	lower
189	functional connectivity	AD-realted	APOE	syn	0.181639	0.0923517	-1.23437	74	(0.9, 3, 0.5)	0	0	0.394049	lower
190	functional connectivity	Receptors	5HT4	clear	0.174364	0.104201	-1.36079	590	(0.01, 0.1, 0.1)	0	0	0.394049	lower
191	functional connectivity	Receptors	MOR	clear	0.17184	0.0949229	-1.19779	22	(0.01, 2.9, 1)	0	0	0.394049	lower
192	functional connectivity	Receptors	GABAa	syn	0.170713	0.085924	-0.563095	29999	(0.01, 2.9, 1)	0	0	0.394049	lower
193	functional connectivity	Receptors	D2	clear	0.163317	0.0949183	-1.00077	23	(0.01, 2.9, 1)	0	0	0.394049	lower
194	functional connectivity	AD-realted	MAPT	clear	0.161648	0.10588	-1.33116	742	(0.01, 0.1, 0.1)	0	0	0.394049	lower
195	functional connectivity	Microstructure	thickness	clear	0.160378	0.105859	-1.33999	643	(0.01, 0.1, 0.1)	0	0	0.394049	lower
196	functional connectivity	Receptors	A4B2	syn	0.159158	0.0365444	-1.00887	696	(0.01, 0.9, 1)	0	0	0.394049	lower
197	functional connectivity	Receptors	5HT1a	clear	0.158888	0.105272	-1.34635	754	(0.01, 0.1, 0.1)	0	0	0.394049	lower
1	gene coexpression	AD-realted	MAPT	spread	0.733611	0.0288912	0.528396	311	(0.3, 3, 0.1)	1	0	0.434576	higher
2	gene coexpression	AD-realted	MAPT	mis	0.723453	0.0331894	0.500621	269	(0.1, 3, 0.3)	0	0	0.434576	higher
3	gene coexpression	metabolism	cbv	spread	0.719207	0.0332747	0.491081	429	(0.5, 2, 0.1)	1	0	0.434576	higher
4	gene coexpression	Cortical expansion	scalinghcp	syn	0.701086	0.0468213	0.301035	73	(0.3, 3, 0.7)	1	0	0.434576	higher
5	gene coexpression	Microstructure	genepc1	spread	0.697416	0.0313341	0.408249	299	(0.5, 2.9, 0.1)	1	0	0.434576	higher
6	gene coexpression	AD-realted	MAPT	syn	0.697255	0.0276762	0.46364	578	(0.1, 2, 0.1)	0	0	0.434576	higher
7	gene coexpression	Receptors	VAChT	clear	0.696657	0.048274	0.328751	57	(0.5, 3, 1)	1	0	0.434576	higher
8	gene coexpression	Receptors	D2	mis	0.6948	0.0527101	0.405727	144	(0.5, 3, 0.5)	1	0	0.434576	higher
9	gene coexpression	Cortical expansion	scalinghcp	spread	0.688887	0.0328785	0.415688	304	(0.5, 2.5, 0.1)	0	0	0.434576	higher
10	gene coexpression	Cortical expansion	scalinghcp	mis	0.682733	0.0549962	0.17185	90	(0.5, 2.9, 1)	0	0	0.434576	higher
11	gene coexpression	Cortical expansion	scaling	syn	0.680845	0.0519948	0.271835	61	(0.5, 3, 1)	1	0	0.434576	higher
12	gene coexpression	Microstructure	myelinmap	spread	0.673638	0.0359216	0.371561	324	(0.5, 2.5, 0.1)	1	0	0.434576	higher
13	gene coexpression	Celltype	Micro	spread	0.669224	0.0286938	0.415746	301	(0.5, 2.9, 0.1)	1	0	0.434576	higher
14	gene coexpression	Receptors	5HT4	mis	0.6691	0.0477289	0.365453	386	(0.9, 2, 0.1)	1	0	0.434576	higher
15	gene coexpression	Cortical expansion	scaling	mis	0.669085	0.0512477	0.185697	81	(0.5, 3, 1)	0	0	0.434576	higher
16	gene coexpression	Microstructure	thickness	mis	0.669042	0.0455923	0.35201	524	(0.3, 2.9, 0.1)	1	0	0.434576	higher
17	gene coexpression	Cortical expansion	scaling	spread	0.661852	0.0333041	0.376523	296	(0.5, 2.5, 0.1)	0	0	0.434576	higher
18	gene coexpression	Receptors	5HT4	syn	0.659195	0.046045	0.338995	422	(0.9, 1, 0.1)	0	0	0.434576	higher
19	gene coexpression	Cortical expansion	scalingpnc	spread	0.651606	0.0315979	0.369339	269	(0.5, 2.9, 0.1)	1	0	0.434576	higher
20	gene coexpression	Receptors	D2	spread	0.650728	0.0370307	0.397067	318	(0.3, 3, 0.1)	0	0	0.434576	higher
21	gene coexpression	Receptors	5HT1a	mis	0.648676	0.0519903	0.251215	711	(0.1, 3, 0.1)	1	0	0.434576	higher
22	gene coexpression	Microstructure	thickness	spread	0.648116	0.0323928	0.38741	308	(0.3, 3, 0.1)	0	0	0.434576	higher
23	gene coexpression	Celltype	Astro	spread	0.645383	0.0378221	0.348881	353	(0.5, 2.5, 0.1)	1	0	0.434576	higher
24	gene coexpression	AD-realted	APOE	spread	0.644707	0.0254464	0.363141	303	(0.5, 2.5, 0.1)	1	0	0.434576	higher
25	gene coexpression	Celltype	OPC	spread	0.642258	0.0367278	0.337214	357	(0.5, 2.5, 0.1)	1	0	0.434576	higher
26	gene coexpression	Cortical expansion	scalingnih	syn	0.636236	0.0428918	0.248181	117	(0.3, 2.5, 0.3)	1	0	0.434576	higher
27	gene coexpression	Receptors	5HT4	spread	0.631176	0.0320811	0.364933	322	(0.5, 2.5, 0.1)	0	0	0.434576	higher
28	gene coexpression	Cortical expansion	scalingpnc	syn	0.628345	0.0496429	0.138093	61	(0.5, 3, 1)	0	0	0.434576	higher
29	gene coexpression	Microstructure	thickness	syn	0.628055	0.0311987	0.344824	199	(0.01, 2.5, 0.3)	0	0	0.434576	higher
30	gene coexpression	Cortical expansion	evoexp	syn	0.627236	0.0635823	0.26571	123	(0.9, 2.5, 0.1)	1	0	0.434576	higher
31	gene coexpression	Receptors	D2	syn	0.626429	0.0363142	0.355415	122	(0.01, 3, 0.5)	0	0	0.434576	higher
32	gene coexpression	Receptors	5HT1a	spread	0.623548	0.0358046	0.355018	327	(0.3, 3, 0.1)	0	0	0.434576	higher
33	gene coexpression	Cortical expansion	evoexp	mis	0.622442	0.0580346	0.226742	125	(0.7, 3, 0.3)	0	0	0.434576	higher
34	gene coexpression	Cortical expansion	scalingnih	spread	0.621684	0.0349119	0.329009	312	(0.5, 2.5, 0.1)	0	0	0.434576	higher
35	gene coexpression	Cortical expansion	scalingnih	mis	0.617904	0.0422095	0.219827	97	(0.3, 3, 0.7)	0	0	0.434576	higher
36	gene coexpression	Receptors	5HTT	clear	0.617645	0.0608494	-0.157995	46	(0.01, 2, 1)	1	0	0.434576	higher
37	gene coexpression	Receptors	5HT2a	spread	0.59552	0.0340452	0.301081	269	(0.5, 2.9, 0.1)	1	0	0.434576	higher
38	gene coexpression	Cortical expansion	evoexp	spread	0.592292	0.0323973	0.278396	310	(0.5, 2.5, 0.1)	0	0	0.434576	higher
39	gene coexpression	Receptors	5HT6	spread	0.582066	0.0346519	0.298013	282	(0.5, 2.9, 0.1)	1	0	0.434576	higher
40	gene coexpression	Receptors	5HT1b	clear	0.581535	0.0314387	0.152321	3347	(0.1, 3, 0.1)	1	0	0.434576	higher
41	gene coexpression				0.572427	0.0305307	0.290578	305	(0.5, 2.5, 0.1)	0	1	0.434576	higher
42	gene coexpression	AD-realted	Cluster1	syn	0.572427	0.0305307	0.290578	305	(0.5, 2.5, 0.1)	1	0	0.434576	higher
43	gene coexpression	AD-realted	Cluster4	clear	0.572427	0.0305307	0.290578	305	(0.5, 2.5, 0.1)	0	0	0.434576	higher
44	gene coexpression	AD-realted	Cluster7	mis	0.572427	0.0305307	0.290578	305	(0.5, 2.5, 0.1)	0	0	0.434576	higher
45	gene coexpression	AD-realted	Cluster7	spread	0.572427	0.0305307	0.290578	305	(0.5, 2.5, 0.1)	0	0	0.434576	higher
46	gene coexpression	AD-realted	Cluster7	syn	0.572427	0.0305307	0.290578	305	(0.5, 2.5, 0.1)	1	0	0.434576	higher
47	gene coexpression	AD-realted	Cluster6	clear	0.572427	0.0305307	0.290578	305	(0.5, 2.5, 0.1)	0	0	0.434576	higher
48	gene coexpression	AD-realted	Cluster6	mis	0.572427	0.0305307	0.290578	305	(0.5, 2.5, 0.1)	0	0	0.434576	higher
49	gene coexpression	AD-realted	Cluster6	spread	0.572427	0.0305307	0.290578	305	(0.5, 2.5, 0.1)	0	0	0.434576	higher
50	gene coexpression	AD-realted	Cluster6	syn	0.572427	0.0305307	0.290578	305	(0.5, 2.5, 0.1)	1	0	0.434576	higher
51	gene coexpression	AD-realted	Cluster5	clear	0.572427	0.0305307	0.290578	305	(0.5, 2.5, 0.1)	0	0	0.434576	higher
52	gene coexpression	AD-realted	Cluster5	mis	0.572427	0.0305307	0.290578	305	(0.5, 2.5, 0.1)	0	0	0.434576	higher
53	gene coexpression	AD-realted	Cluster5	spread	0.572427	0.0305307	0.290578	305	(0.5, 2.5, 0.1)	0	0	0.434576	higher
54	gene coexpression	AD-realted	Cluster5	syn	0.572427	0.0305307	0.290578	305	(0.5, 2.5, 0.1)	1	0	0.434576	higher
55	gene coexpression	AD-realted	Cluster4	mis	0.572427	0.0305307	0.290578	305	(0.5, 2.5, 0.1)	0	0	0.434576	higher
56	gene coexpression	AD-realted	Cluster1	spread	0.572427	0.0305307	0.290578	305	(0.5, 2.5, 0.1)	0	0	0.434576	higher
57	gene coexpression	AD-realted	Cluster4	spread	0.572427	0.0305307	0.290578	305	(0.5, 2.5, 0.1)	0	0	0.434576	higher
58	gene coexpression	AD-realted	Cluster4	syn	0.572427	0.0305307	0.290578	305	(0.5, 2.5, 0.1)	1	0	0.434576	higher
59	gene coexpression	AD-realted	Cluster3	clear	0.572427	0.0305307	0.290578	305	(0.5, 2.5, 0.1)	0	0	0.434576	higher
60	gene coexpression	AD-realted	Cluster3	mis	0.572427	0.0305307	0.290578	305	(0.5, 2.5, 0.1)	0	0	0.434576	higher
61	gene coexpression	AD-realted	Cluster3	spread	0.572427	0.0305307	0.290578	305	(0.5, 2.5, 0.1)	0	0	0.434576	higher
62	gene coexpression	AD-realted	Cluster3	syn	0.572427	0.0305307	0.290578	305	(0.5, 2.5, 0.1)	1	0	0.434576	higher
63	gene coexpression	AD-realted	Cluster2	clear	0.572427	0.0305307	0.290578	305	(0.5, 2.5, 0.1)	0	0	0.434576	higher
64	gene coexpression	AD-realted	Cluster2	mis	0.572427	0.0305307	0.290578	305	(0.5, 2.5, 0.1)	0	0	0.434576	higher
65	gene coexpression	AD-realted	Cluster2	spread	0.572427	0.0305307	0.290578	305	(0.5, 2.5, 0.1)	0	0	0.434576	higher
66	gene coexpression	AD-realted	Cluster2	syn	0.572427	0.0305307	0.290578	305	(0.5, 2.5, 0.1)	1	0	0.434576	higher
67	gene coexpression	AD-realted	Cluster1	mis	0.572427	0.0305307	0.290578	305	(0.5, 2.5, 0.1)	0	0	0.434576	higher
68	gene coexpression	AD-realted	Cluster1	clear	0.572427	0.0305307	0.290578	305	(0.5, 2.5, 0.1)	0	0	0.434576	higher
69	gene coexpression	AD-realted	Cluster7	clear	0.572427	0.0305307	0.290578	305	(0.5, 2.5, 0.1)	0	0	0.434576	higher
70	gene coexpression	Cortical expansion	scalingpnc	mis	0.572413	0.0461175	0.040799	79	(0.5, 3, 1)	0	0	0.434576	higher
71	gene coexpression	Receptors	M1	spread	0.571311	0.0341069	0.273579	276	(0.5, 3, 0.1)	1	0	0.434576	higher
72	gene coexpression	Receptors	5HT2a	syn	0.569617	0.0563857	-0.0192707	59	(0.5, 3, 1)	0	0	0.434576	higher
73	gene coexpression	Receptors	5HT2a	mis	0.563211	0.0572335	-0.159741	80	(0.5, 3, 0.9)	0	0	0.434576	higher
74	gene coexpression	Receptors	M1	syn	0.562189	0.0423339	0.0320266	118	(0.1, 3, 0.3)	0	0	0.434576	higher
75	gene coexpression	Receptors	NET	spread	0.560368	0.0307643	0.249622	296	(0.5, 2.9, 0.1)	1	0	0.434576	higher
76	gene coexpression	AD-realted	Abeta	spread	0.55656	0.0345642	0.265072	265	(0.5, 3, 0.1)	1	0	0.434576	higher
77	gene coexpression	Celltype	Astro	syn	0.555528	0.0404947	0.129695	88	(0.05, 3, 1)	0	0	0.434576	higher
78	gene coexpression	Celltype	Oligo	clear	0.554974	0.0429212	0.109035	68	(0.01, 3, 1)	1	0	0.434576	higher
79	gene coexpression	Receptors	DAT	spread	0.554279	0.0365619	0.262095	397	(0.3, 3, 0.1)	1	0	0.434576	higher
80	gene coexpression	metabolism	cmr02	spread	0.553358	0.0329504	0.24509	290	(0.5, 3, 0.1)	1	0	0.434576	higher
81	gene coexpression	Celltype	OPC	syn	0.547556	0.0368971	0.13011	92	(0.05, 3, 1)	0	0	0.434576	higher
82	gene coexpression	metabolism	cbf	clear	0.543236	0.0309452	0.233671	29999	(0.9, 1.5, 0.1)	1	0	0.434576	higher
83	gene coexpression	Receptors	5HT6	syn	0.539148	0.0298374	0.064016	76	(0.01, 3, 1)	0	0	0.434576	higher
84	gene coexpression	Celltype	Endo	clear	0.538246	0.0708744	-0.24369	45	(0.01, 1.9, 1)	1	0	0.434576	higher
85	gene coexpression	Celltype	Neuro-Ex	spread	0.533206	0.0347189	0.212018	343	(0.5, 2.5, 0.1)	1	0	0.434576	higher
86	gene coexpression	Receptors	M1	mis	0.524424	0.0548508	-0.123468	153	(0.3, 3, 0.3)	0	0	0.434576	higher
87	gene coexpression	metabolism	cbv	syn	0.522038	0.0288299	0.0425632	85	(0.01, 3, 1)	0	0	0.434576	higher
88	gene coexpression	Receptors	CB1	spread	0.51566	0.0368253	0.215508	293	(0.5, 2.9, 0.1)	1	0	0.434576	higher
89	gene coexpression	Receptors	D1	spread	0.513394	0.0345633	0.199728	326	(0.5, 2.9, 0.1)	1	0	0.434576	higher
90	gene coexpression	Cortical expansion	devexp	spread	0.511847	0.0335207	0.179828	297	(0.5, 2.9, 0.1)	1	0	0.434576	higher
91	gene coexpression	Celltype	Micro	syn	0.506519	0.0366812	-0.161859	88	(0.01, 2.9, 1)	0	0	0.434576	higher
92	gene coexpression	Cortical expansion	devexp	mis	0.504708	0.0639901	-0.282552	497	(0.3, 3, 0.1)	0	0	0.434576	higher
93	gene coexpression	Receptors	NET	clear	0.504563	0.0314627	-0.0277808	303	(0.3, 3, 1)	0	0	0.434576	higher
94	gene coexpression	Cortical expansion	devexp	syn	0.503623	0.0526793	-0.271953	13524	(0.9, 0.5, 0.1)	0	0	0.434576	higher
95	gene coexpression	Receptors	5HT1a	syn	0.503295	0.0363438	0.195908	186	(0.01, 1.9, 1)	0	0	0.434576	higher
96	gene coexpression	Receptors	NMDA	spread	0.501121	0.0368801	0.188523	321	(0.5, 2.9, 0.1)	1	0	0.434576	higher
97	gene coexpression	AD-realted	Abeta	syn	0.497638	0.0383211	0.15228	59	(0.01, 3, 1)	0	0	0.434576	higher
98	gene coexpression	Celltype	Neuro-In	spread	0.497428	0.0353628	0.170661	314	(0.5, 2.9, 0.1)	1	0	0.434576	higher
99	gene coexpression	Celltype	Endo	syn	0.496457	0.0268118	0.0249741	122	(0.05, 2, 1)	0	0	0.434576	higher
100	gene coexpression	Receptors	GABAa	spread	0.492157	0.0345252	0.156786	319	(0.5, 2.9, 0.1)	1	0	0.434576	higher
101	gene coexpression	Receptors	mGluR5	spread	0.491896	0.0352156	0.16357	301	(0.5, 3, 0.1)	1	0	0.434576	higher
102	gene coexpression	Celltype	Astro	mis	0.490875	0.0788614	-0.376823	99	(0.7, 3, 1)	0	0	0.434576	higher
103	gene coexpression	metabolism	cmrglc	clear	0.484011	0.0393869	0.13336	29999	(0.7, 3, 1)	1	0	0.434576	higher
104	gene coexpression	Celltype	OPC	mis	0.48389	0.0825639	-0.437041	187	(0.9, 2.9, 0.1)	0	0	0.434576	higher
105	gene coexpression	Receptors	5HTT	spread	0.483437	0.0336047	0.114894	419	(0.5, 2.5, 0.1)	0	0	0.434576	higher
106	gene coexpression	metabolism	cmrglc	spread	0.482747	0.0347093	0.0988569	294	(0.5, 3, 0.1)	0	0	0.434576	higher
107	gene coexpression	Receptors	MOR	spread	0.476873	0.0380617	0.156399	313	(0.5, 2.9, 0.1)	1	0	0.434576	higher
108	gene coexpression	Celltype	Neuro-Ex	syn	0.476862	0.0318146	0.0932941	96	(0.01, 3, 1)	0	0	0.434576	higher
109	gene coexpression	Receptors	H3	clear	0.474382	0.0530994	-0.0777669	67	(0.7, 3, 1)	1	0	0.434576	higher
110	gene coexpression	Receptors	A4B2	clear	0.470972	0.0424521	-0.142954	86	(0.01, 3, 1)	1	0	0.434576	higher
111	gene coexpression	metabolism	cmr02	clear	0.470247	0.0476352	0.0964819	29999	(0.7, 3, 1)	0	0	0.434576	higher
112	gene coexpression	Celltype	Endo	spread	0.466621	0.0361237	0.0816611	318	(0.5, 2.9, 0.1)	0	0	0.434576	higher
113	gene coexpression	Receptors	VAChT	syn	0.461456	0.0360258	-0.0371269	540	(0.1, 0.9, 1)	0	0	0.434576	higher
114	gene coexpression	Receptors	NMDA	syn	0.460477	0.0442324	0.066152	256	(0.05, 1.5, 0.5)	0	0	0.434576	higher
115	gene coexpression	Receptors	5HTT	syn	0.459537	0.0508209	0.0605769	615	(0.01, 0.9, 1)	0	0	0.434576	higher
116	gene coexpression	AD-realted	Abeta	mis	0.453514	0.037745	0.0349674	78	(0.1, 3, 1)	0	0	0.434576	higher
117	gene coexpression	Receptors	5HT6	mis	0.441681	0.0440577	-0.371774	101	(0.01, 3, 1)	0	0	0.434576	higher
118	gene coexpression	Receptors	H3	syn	0.436339	0.031274	-0.0838587	422	(0.1, 0.9, 1)	0	0	0.434576	higher
119	gene coexpression	Receptors	CB1	syn	0.436053	0.0402977	0.0807111	128	(0.01, 1.5, 1)	0	0	0.434576	higher
120	gene coexpression	Celltype	Oligo	spread	0.435219	0.0387494	-0.0738849	355	(0.5, 2.5, 0.1)	0	0	0.434576	higher
121	gene coexpression	AD-realted	APOE	clear	0.433427	0.0528421	0.113294	29999	(0.9, 3, 1)	0	0	0.434576	lower
122	gene coexpression	Celltype	Neuro-In	syn	0.429246	0.0449009	0.0481986	124	(0.01, 2, 1)	0	0	0.434576	lower
123	gene coexpression	metabolism	cbv	mis	0.426769	0.0623257	-0.203011	118	(0.5, 3, 1)	0	0	0.434576	lower
124	gene coexpression	Receptors	GABAa	clear	0.426034	0.0274938	-0.200889	119	(0.01, 3, 1)	0	0	0.434576	lower
125	gene coexpression	metabolism	cbf	spread	0.424018	0.0322009	-0.0686303	324	(0.7, 2.5, 0.1)	0	0	0.434576	lower
126	gene coexpression	Microstructure	myelinmap	clear	0.421298	0.0596213	0.0720804	29999	(0.9, 3, 1)	0	0	0.434576	lower
127	gene coexpression	Receptors	A4B2	spread	0.420403	0.0385322	0.0418008	305	(0.5, 3, 0.1)	0	0	0.434576	lower
128	gene coexpression	Receptors	D1	syn	0.415928	0.0379551	-0.0022687	174	(0.01, 1.5, 1)	0	0	0.434576	lower
129	gene coexpression	Receptors	mGluR5	syn	0.415468	0.0477321	0.0466954	153	(0.01, 1.5, 1)	0	0	0.434576	lower
130	gene coexpression	Receptors	5HT1b	spread	0.415225	0.0375083	0.0180516	310	(0.5, 3, 0.1)	0	0	0.434576	lower
131	gene coexpression	Receptors	DAT	syn	0.40823	0.0558902	0.000604395	428	(0.01, 0.9, 1)	0	0	0.434576	lower
132	gene coexpression	Receptors	VAChT	spread	0.407933	0.0400378	0.025218	328	(0.5, 3, 0.1)	0	0	0.434576	lower
133	gene coexpression	Receptors	MOR	syn	0.393709	0.0394121	-0.0369406	205	(0.01, 1, 1)	0	0	0.434576	lower
134	gene coexpression	Receptors	H3	spread	0.39115	0.0395554	-0.0137595	321	(0.5, 3, 0.1)	0	0	0.434576	lower
135	gene coexpression	Microstructure	genepc1	clear	0.384565	0.0711986	0.0445456	29999	(0.7, 3, 1)	0	0	0.434576	lower
136	gene coexpression	Celltype	Micro	mis	0.377098	0.0426566	-0.352646	186	(0.01, 2, 1)	0	0	0.434576	lower
137	gene coexpression	Celltype	Oligo	syn	0.366366	0.0311046	-0.290243	153	(0.01, 1.5, 1)	0	0	0.434576	lower
138	gene coexpression	Receptors	GABAa	syn	0.356973	0.0317238	-0.300742	125	(0.01, 1.9, 1)	0	0	0.434576	lower
139	gene coexpression	Receptors	CB1	mis	0.356248	0.0488658	-0.00888966	1862	(0.01, 1.5, 0.1)	0	0	0.434576	lower
140	gene coexpression	Receptors	A4B2	syn	0.350939	0.0298421	-0.549273	375	(0.01, 0.9, 1)	0	0	0.434576	lower
141	gene coexpression	Receptors	NMDA	mis	0.347863	0.0451815	-0.135082	123	(0.01, 2.9, 1)	0	0	0.434576	lower
142	gene coexpression	Receptors	DAT	mis	0.343677	0.0496873	-0.0201093	29999	(0.01, 2, 1)	0	0	0.434576	lower
143	gene coexpression	Receptors	NET	syn	0.336279	0.0353416	-0.351377	73	(0.01, 3, 1)	0	0	0.434576	lower
144	gene coexpression	Receptors	MOR	mis	0.333476	0.0650021	-0.0287658	29999	(0.3, 3, 1)	0	0	0.434576	lower
145	gene coexpression	Receptors	D1	mis	0.332719	0.0434271	-0.125276	29999	(0.01, 2.5, 1)	0	0	0.434576	lower
146	gene coexpression	Receptors	NMDA	clear	0.331213	0.0787633	-0.636705	46	(0.01, 3, 1)	0	0	0.434576	lower
147	gene coexpression	Celltype	Endo	mis	0.324549	0.0735801	-0.902772	106	(0.5, 3, 1)	0	0	0.434576	lower
148	gene coexpression	Receptors	mGluR5	mis	0.319967	0.0516376	-0.0592097	2692	(0.01, 1.5, 0.1)	0	0	0.434576	lower
149	gene coexpression	Celltype	Neuro-In	clear	0.317716	0.0700282	-0.869576	84	(0.01, 1, 1)	0	0	0.434576	lower
150	gene coexpression	Receptors	5HT1b	syn	0.307779	0.0270984	-1.14408	426	(0.01, 0.9, 1)	0	0	0.434576	lower
151	gene coexpression	Celltype	Neuro-Ex	clear	0.305304	0.0826973	-1.12586	56	(0.01, 1.5, 1)	0	0	0.434576	lower
152	gene coexpression	Celltype	Neuro-Ex	mis	0.301605	0.0491272	-0.425124	112	(0.01, 3, 1)	0	0	0.434576	lower
153	gene coexpression	Microstructure	myelinmap	syn	0.294705	0.0587377	-0.707626	70	(0.3, 3, 1)	0	0	0.434576	lower
154	gene coexpression	Receptors	M1	clear	0.27801	0.0317707	-0.680266	242	(0.01, 3, 1)	0	0	0.434576	lower
155	gene coexpression	Receptors	5HT6	clear	0.255996	0.0336892	-0.787405	138	(0.3, 3, 1)	0	0	0.434576	lower
156	gene coexpression	metabolism	cbv	clear	0.251323	0.0912698	-0.12712	29999	(0.5, 3, 1)	0	0	0.434576	lower
157	gene coexpression	metabolism	cmr02	syn	0.245815	0.0531989	-0.991349	71	(0.01, 3, 1)	0	0	0.434576	lower
158	gene coexpression	Receptors	mGluR5	clear	0.243969	0.0813844	-0.606768	60	(0.5, 3, 1)	0	0	0.434576	lower
159	gene coexpression	Celltype	Neuro-In	mis	0.229386	0.0480312	-0.443857	138	(0.01, 2.5, 1)	0	0	0.434576	lower
160	gene coexpression	metabolism	cbf	syn	0.221074	0.0440605	-0.844434	72	(0.01, 3, 1)	0	0	0.434576	lower
161	gene coexpression	metabolism	cmrglc	syn	0.216051	0.0498617	-0.916229	69	(0.01, 3, 1)	0	0	0.434576	lower
162	gene coexpression	Microstructure	myelinmap	mis	0.211903	0.096785	-1.00195	129	(0.9, 3, 0.5)	0	0	0.434576	lower
163	gene coexpression	Receptors	D2	clear	0.204965	0.108871	-1.612	48	(0.9, 3, 0.1)	0	0	0.434576	lower
164	gene coexpression	Celltype	Micro	clear	0.19116	0.0511238	-0.56864	200	(0.01, 0.5, 1)	0	0	0.434576	lower
165	gene coexpression	Microstructure	genepc1	syn	0.178055	0.0802602	-1.25518	67	(0.01, 3, 1)	0	0	0.434576	lower
166	gene coexpression	Receptors	DAT	clear	0.166824	0.085499	-1.08822	31	(0.01, 3, 1)	0	0	0.434576	lower
167	gene coexpression	AD-realted	APOE	syn	0.16458	0.0755665	-1.35643	67	(0.01, 3, 1)	0	0	0.434576	lower
168	gene coexpression	Celltype	OPC	clear	0.160152	0.0743605	-1.1467	164	(0.01, 0.5, 1)	0	0	0.434576	lower
169	gene coexpression	Cortical expansion	scalingpnc	clear	0.159866	0.0757144	-0.617431	73	(0.1, 3, 1)	0	0	0.434576	lower
170	gene coexpression	Receptors	5HTT	mis	0.156618	0.0754734	-0.715234	690	(0.01, 1.5, 1)	0	0	0.434576	lower
171	gene coexpression	Receptors	5HT2a	clear	0.155517	0.0891668	-0.566406	29999	(0.5, 0.1, 1)	0	0	0.434576	lower
172	gene coexpression	Celltype	Astro	clear	0.154052	0.0740944	-1.15795	180	(0.01, 0.5, 1)	0	0	0.434576	lower
173	gene coexpression	metabolism	cmr02	mis	0.150256	0.0860439	-1.31885	80	(0.3, 3, 1)	0	0	0.434576	lower
174	gene coexpression	Microstructure	genepc1	mis	0.147518	0.101588	-1.23427	84	(0.7, 3, 1)	0	0	0.434576	lower
175	gene coexpression	Cortical expansion	evoexp	clear	0.139786	0.0966955	-0.852448	68	(0.01, 1, 1)	0	0	0.434576	lower
176	gene coexpression	Receptors	GABAa	mis	0.139529	0.0837103	-1.00842	172	(0.01, 1.5, 1)	0	0	0.434576	lower
177	gene coexpression	Cortical expansion	scaling	clear	0.137666	0.0936358	-1.02919	1379	(0.01, 0.1, 1)	0	0	0.434576	lower
178	gene coexpression	Receptors	H3	mis	0.136438	0.082969	-1.09846	2975	(0.01, 1, 1)	0	0	0.434576	lower
179	gene coexpression	AD-realted	Abeta	clear	0.135723	0.0966139	-1.04536	220	(0.01, 0.1, 1)	0	0	0.434576	lower
180	gene coexpression	Cortical expansion	devexp	clear	0.133688	0.0957215	-0.966261	92	(0.01, 0.5, 1)	0	0	0.434576	lower
181	gene coexpression	Cortical expansion	scalinghcp	clear	0.132287	0.0943617	-1.07661	1967	(0.01, 0.1, 1)	0	0	0.434576	lower
182	gene coexpression	Cortical expansion	scalingnih	clear	0.129544	0.0964756	-1.08042	447	(0.01, 0.1, 1)	0	0	0.434576	lower
183	gene coexpression	Receptors	A4B2	mis	0.129346	0.0911132	-1.23503	29999	(0.01, 1, 0.1)	0	0	0.434576	lower
184	gene coexpression	AD-realted	APOE	mis	0.129162	0.0959042	-1.30329	66	(0.1, 3, 1)	0	0	0.434576	lower
185	gene coexpression	Celltype	Oligo	mis	0.126174	0.0926934	-1.26957	157	(0.01, 1.5, 1)	0	0	0.434576	lower
186	gene coexpression	Receptors	MOR	clear	0.124994	0.106329	-1.35827	32	(0.01, 3, 1)	0	0	0.434576	lower
187	gene coexpression	Receptors	VAChT	mis	0.123483	0.0964606	-1.15471	12550	(0.01, 1, 0.1)	0	0	0.434576	lower
188	gene coexpression	Receptors	NET	mis	0.122102	0.0994857	-1.20927	1627	(0.01, 0.9, 0.1)	0	0	0.434576	lower
189	gene coexpression	metabolism	cmrglc	mis	0.120206	0.100189	-1.26334	1049	(0.01, 1, 0.1)	0	0	0.434576	lower
190	gene coexpression	Receptors	D1	clear	0.118078	0.101057	-1.34991	74	(0.01, 0.9, 1)	0	0	0.434576	lower
191	gene coexpression	Receptors	5HT1b	mis	0.117749	0.101934	-1.22669	8342	(0.01, 0.5, 0.1)	0	0	0.434576	lower
192	gene coexpression	metabolism	cbf	mis	0.117133	0.102602	-1.24386	1971	(0.01, 0.5, 0.1)	0	0	0.434576	lower
193	gene coexpression	Receptors	CB1	clear	0.113621	0.105282	-1.23466	1014	(0.01, 0.1, 0.1)	0	0	0.434576	lower
194	gene coexpression	Receptors	5HT4	clear	0.111393	0.105518	-1.24542	1088	(0.01, 0.1, 0.1)	0	0	0.434576	lower
195	gene coexpression	Microstructure	thickness	clear	0.105289	0.106792	-1.26707	1036	(0.01, 0.1, 0.1)	0	0	0.434576	lower
196	gene coexpression	AD-realted	MAPT	clear	0.104431	0.107384	-1.29633	1627	(0.01, 0.1, 0.1)	0	0	0.434576	lower
197	gene coexpression	Receptors	5HT1a	clear	0.101281	0.108547	-1.29869	1039	(0.01, 0.1, 0.1)	0	0	0.434576	lower
1	receptor similarity	AD-realted	MAPT	mis	0.78635	0.0135255	0.615203	412	(0.7, 2.5, 1)	1	0	0.30567	higher
2	receptor similarity	AD-realted	MAPT	spread	0.775825	0.0223544	0.553417	617	(0.9, 3, 0.7)	0	0	0.30567	higher
3	receptor similarity	AD-realted	MAPT	syn	0.731107	0.0170746	0.507907	676	(0.9, 1.5, 0.1)	0	0	0.30567	higher
4	receptor similarity	Cortical expansion	scalinghcp	syn	0.727384	0.0419162	0.427783	99	(0.7, 3, 0.7)	1	0	0.30567	higher
5	receptor similarity	Cortical expansion	scaling	syn	0.71866	0.0502082	0.416941	123	(0.9, 3, 0.1)	1	0	0.30567	higher
6	receptor similarity	Receptors	VAChT	clear	0.712955	0.052331	0.315413	61	(0.3, 3, 1)	1	0	0.30567	higher
7	receptor similarity	Cortical expansion	scalingpnc	spread	0.705025	0.0294432	0.43474	427	(0.9, 1, 1)	1	0	0.30567	higher
8	receptor similarity	Cortical expansion	scaling	spread	0.704083	0.0306687	0.456256	190	(0.7, 1.5, 1)	0	0	0.30567	higher
9	receptor similarity	Cortical expansion	scalinghcp	mis	0.702479	0.0483876	0.306114	82	(0.3, 3, 1)	0	0	0.30567	higher
10	receptor similarity	Receptors	D2	syn	0.700691	0.0361376	0.449911	296	(0.7, 0.9, 1)	1	0	0.30567	higher
11	receptor similarity	Cortical expansion	scalinghcp	spread	0.70044	0.0324194	0.454959	135	(0.5, 2, 1)	0	0	0.30567	higher
12	receptor similarity	Cortical expansion	scaling	mis	0.682645	0.0479674	0.317135	87	(0.5, 2.5, 1)	0	0	0.30567	higher
13	receptor similarity	Cortical expansion	scalingnih	syn	0.676692	0.0454655	0.236156	88	(0.5, 1.9, 1)	1	0	0.30567	higher
14	receptor similarity	Microstructure	thickness	syn	0.674548	0.0393433	0.318432	546	(0.3, 1.5, 0.1)	1	0	0.30567	higher
15	receptor similarity	Receptors	5HT4	mis	0.674512	0.042045	0.306849	130	(0.5, 1.9, 1)	1	0	0.30567	higher
16	receptor similarity	Cortical expansion	scalingnih	spread	0.673309	0.0323098	0.395481	194	(0.7, 1.5, 1)	0	0	0.30567	higher
17	receptor similarity	Receptors	5HT4	syn	0.672736	0.0438821	0.315755	186	(0.7, 1, 0.7)	0	0	0.30567	higher
18	receptor similarity	Receptors	D2	mis	0.670726	0.0481703	0.348711	235	(0.7, 1.5, 1)	0	0	0.30567	higher
19	receptor similarity	Receptors	5HT4	spread	0.66377	0.028939	0.388611	207	(0.7, 1.5, 0.9)	0	0	0.30567	higher
20	receptor similarity	Cortical expansion	devexp	spread	0.65673	0.0212178	0.395653	365	(0.9, 1.5, 1)	1	0	0.30567	higher
21	receptor similarity	Receptors	D2	spread	0.65564	0.0356875	0.34558	155	(0.5, 2, 1)	0	0	0.30567	higher
22	receptor similarity	Cortical expansion	evoexp	syn	0.654669	0.0465171	0.248405	109	(0.7, 1.5, 1)	1	0	0.30567	higher
23	receptor similarity	Cortical expansion	scalingnih	mis	0.648517	0.0510655	0.187982	87	(0.5, 2.5, 1)	0	0	0.30567	higher
24	receptor similarity	Receptors	5HT1a	syn	0.648075	0.0276999	0.397107	1158	(0.1, 1.5, 0.1)	1	0	0.30567	higher
25	receptor similarity	Cortical expansion	scalingpnc	syn	0.64264	0.0515689	0.0467512	59	(0.3, 2.9, 1)	0	0	0.30567	higher
26	receptor similarity	Microstructure	thickness	mis	0.640367	0.0362381	0.30184	131	(0.1, 3, 1)	0	0	0.30567	higher
27	receptor similarity	Receptors	5HTT	clear	0.64003	0.0574231	0.0672802	45	(0.01, 2, 1)	1	0	0.30567	higher
28	receptor similarity	Cortical expansion	evoexp	mis	0.639304	0.0553274	0.185563	98	(0.7, 2.5, 1)	0	0	0.30567	higher
29	receptor similarity	metabolism	cbv	spread	0.638868	0.0401709	0.325715	122	(0.5, 3, 1)	1	0	0.30567	higher
30	receptor similarity	Microstructure	genepc1	spread	0.635499	0.0331628	0.295863	96	(0.3, 3, 1)	1	0	0.30567	higher
31	receptor similarity	AD-realted	Abeta	spread	0.634817	0.0338497	0.362558	79	(0.3, 3, 1)	1	0	0.30567	higher
32	receptor similarity	Celltype	Astro	syn	0.634498	0.0306838	0.284872	110	(0.1, 2, 1)	1	0	0.30567	higher
33	receptor similarity	Receptors	5HT6	spread	0.634056	0.0336405	0.370009	112	(0.5, 2, 1)	1	0	0.30567	higher
34	receptor similarity	Celltype	OPC	syn	0.632603	0.0337316	0.260642	89	(0.01, 2.5, 1)	1	0	0.30567	higher
35	receptor similarity	Cortical expansion	scalingpnc	mis	0.629941	0.0557238	0.0771273	72	(0.5, 2.9, 1)	0	0	0.30567	higher
36	receptor similarity	metabolism	cbf	clear	0.629155	0.0219424	0.322698	318	(0.01, 3, 1)	1	0	0.30567	higher
37	receptor similarity	Microstructure	thickness	spread	0.627183	0.0362819	0.286981	98	(0.3, 3, 1)	0	0	0.30567	higher
38	receptor similarity				0.62607	0.0286577	0.314196	87	(0.3, 3, 1)	0	1	0.30567	higher
39	receptor similarity	AD-realted	Cluster1	syn	0.62607	0.0286577	0.314196	87	(0.3, 3, 1)	1	0	0.30567	higher
40	receptor similarity	AD-realted	Cluster4	clear	0.62607	0.0286577	0.314196	87	(0.3, 3, 1)	0	0	0.30567	higher
41	receptor similarity	AD-realted	Cluster7	mis	0.62607	0.0286577	0.314196	87	(0.3, 3, 1)	0	0	0.30567	higher
42	receptor similarity	AD-realted	Cluster7	spread	0.62607	0.0286577	0.314196	87	(0.3, 3, 1)	0	0	0.30567	higher
43	receptor similarity	AD-realted	Cluster7	syn	0.62607	0.0286577	0.314196	87	(0.3, 3, 1)	1	0	0.30567	higher
44	receptor similarity	AD-realted	Cluster6	clear	0.62607	0.0286577	0.314196	87	(0.3, 3, 1)	0	0	0.30567	higher
45	receptor similarity	AD-realted	Cluster6	mis	0.62607	0.0286577	0.314196	87	(0.3, 3, 1)	0	0	0.30567	higher
46	receptor similarity	AD-realted	Cluster6	spread	0.62607	0.0286577	0.314196	87	(0.3, 3, 1)	0	0	0.30567	higher
47	receptor similarity	AD-realted	Cluster6	syn	0.62607	0.0286577	0.314196	87	(0.3, 3, 1)	1	0	0.30567	higher
48	receptor similarity	AD-realted	Cluster5	clear	0.62607	0.0286577	0.314196	87	(0.3, 3, 1)	0	0	0.30567	higher
49	receptor similarity	AD-realted	Cluster5	mis	0.62607	0.0286577	0.314196	87	(0.3, 3, 1)	0	0	0.30567	higher
50	receptor similarity	AD-realted	Cluster5	spread	0.62607	0.0286577	0.314196	87	(0.3, 3, 1)	0	0	0.30567	higher
51	receptor similarity	AD-realted	Cluster5	syn	0.62607	0.0286577	0.314196	87	(0.3, 3, 1)	1	0	0.30567	higher
52	receptor similarity	AD-realted	Cluster4	mis	0.62607	0.0286577	0.314196	87	(0.3, 3, 1)	0	0	0.30567	higher
53	receptor similarity	AD-realted	Cluster1	mis	0.62607	0.0286577	0.314196	87	(0.3, 3, 1)	0	0	0.30567	higher
54	receptor similarity	AD-realted	Cluster4	spread	0.62607	0.0286577	0.314196	87	(0.3, 3, 1)	0	0	0.30567	higher
55	receptor similarity	AD-realted	Cluster4	syn	0.62607	0.0286577	0.314196	87	(0.3, 3, 1)	1	0	0.30567	higher
56	receptor similarity	AD-realted	Cluster3	clear	0.62607	0.0286577	0.314196	87	(0.3, 3, 1)	0	0	0.30567	higher
57	receptor similarity	AD-realted	Cluster3	mis	0.62607	0.0286577	0.314196	87	(0.3, 3, 1)	0	0	0.30567	higher
58	receptor similarity	AD-realted	Cluster3	spread	0.62607	0.0286577	0.314196	87	(0.3, 3, 1)	0	0	0.30567	higher
59	receptor similarity	AD-realted	Cluster3	syn	0.62607	0.0286577	0.314196	87	(0.3, 3, 1)	1	0	0.30567	higher
60	receptor similarity	AD-realted	Cluster2	clear	0.62607	0.0286577	0.314196	87	(0.3, 3, 1)	0	0	0.30567	higher
61	receptor similarity	AD-realted	Cluster2	mis	0.62607	0.0286577	0.314196	87	(0.3, 3, 1)	0	0	0.30567	higher
62	receptor similarity	AD-realted	Cluster2	spread	0.62607	0.0286577	0.314196	87	(0.3, 3, 1)	0	0	0.30567	higher
63	receptor similarity	AD-realted	Cluster2	syn	0.62607	0.0286577	0.314196	87	(0.3, 3, 1)	1	0	0.30567	higher
64	receptor similarity	AD-realted	Cluster1	clear	0.62607	0.0286577	0.314196	87	(0.3, 3, 1)	0	0	0.30567	higher
65	receptor similarity	AD-realted	Cluster1	spread	0.62607	0.0286577	0.314196	87	(0.3, 3, 1)	0	0	0.30567	higher
66	receptor similarity	AD-realted	Cluster7	clear	0.62607	0.0286577	0.314196	87	(0.3, 3, 1)	0	0	0.30567	higher
67	receptor similarity	Receptors	5HT2a	spread	0.625516	0.0375128	0.268911	103	(0.5, 2.5, 0.9)	1	0	0.30567	higher
68	receptor similarity	Receptors	5HT1a	spread	0.624135	0.0354812	0.304997	107	(0.3, 2.9, 1)	0	0	0.30567	higher
69	receptor similarity	Celltype	Micro	spread	0.622936	0.032459	0.347455	170	(0.7, 2.5, 0.9)	1	0	0.30567	higher
70	receptor similarity	AD-realted	APOE	spread	0.621412	0.0249727	0.300078	406	(0.9, 1, 1)	1	0	0.30567	higher
71	receptor similarity	Celltype	Astro	spread	0.620192	0.0368915	0.301918	276	(0.7, 2, 0.3)	0	0	0.30567	higher
72	receptor similarity	Receptors	5HT1a	mis	0.619655	0.0350686	0.327023	1399	(0.01, 2.5, 0.1)	0	0	0.30567	higher
73	receptor similarity	Cortical expansion	evoexp	spread	0.613719	0.0383661	0.236586	85	(0.3, 2.9, 1)	0	0	0.30567	higher
74	receptor similarity	Celltype	OPC	spread	0.610652	0.0387163	0.262191	380	(0.7, 2, 0.1)	0	0	0.30567	higher
75	receptor similarity	Receptors	5HT1b	clear	0.610288	0.021234	0.272615	29999	(0.01, 2.5, 1)	1	0	0.30567	higher
76	receptor similarity	Celltype	Oligo	clear	0.603101	0.0438332	0.0950993	214	(0.01, 0.5, 1)	1	0	0.30567	higher
77	receptor similarity	Microstructure	myelinmap	spread	0.600214	0.037485	0.195913	94	(0.3, 3, 1)	1	0	0.30567	higher
78	receptor similarity	Receptors	5HT2a	syn	0.596062	0.0544354	-0.124662	57	(0.3, 3, 1)	0	0	0.30567	higher
79	receptor similarity	Receptors	NET	spread	0.59563	0.0341734	0.258621	382	(0.9, 1, 1)	1	0	0.30567	higher
80	receptor similarity	AD-realted	Abeta	syn	0.594436	0.0344713	0.244466	58	(0.01, 3, 1)	0	0	0.30567	higher
81	receptor similarity	Celltype	Micro	syn	0.594107	0.0382257	0.0921259	80	(0.01, 2.5, 1)	0	0	0.30567	higher
82	receptor similarity	Receptors	5HT2a	mis	0.59393	0.0471628	0.0276609	70	(0.3, 3, 1)	0	0	0.30567	higher
83	receptor similarity	Receptors	M1	spread	0.592408	0.0404956	0.243462	233	(0.7, 1.5, 0.3)	1	0	0.30567	higher
84	receptor similarity	Receptors	M1	syn	0.588501	0.0433034	0.0148227	60	(0.01, 3, 1)	0	0	0.30567	higher
85	receptor similarity	Receptors	CB1	spread	0.585638	0.0373887	0.233095	162	(0.5, 2.5, 0.3)	1	0	0.30567	higher
86	receptor similarity	AD-realted	Abeta	mis	0.58286	0.0322065	0.245005	71	(0.01, 3, 1)	0	0	0.30567	higher
87	receptor similarity	Celltype	Endo	syn	0.580746	0.027237	0.220612	97	(0.01, 2, 1)	1	0	0.30567	higher
88	receptor similarity	Receptors	5HTT	syn	0.579734	0.0236769	0.223049	176	(0.01, 1.5, 1)	0	0	0.30567	higher
89	receptor similarity	Receptors	DAT	syn	0.571604	0.026176	0.252008	162	(0.01, 1.5, 1)	1	0	0.30567	higher
90	receptor similarity	Cortical expansion	devexp	mis	0.57094	0.0542161	-0.165683	70	(0.1, 3, 1)	0	0	0.30567	higher
91	receptor similarity	Receptors	CB1	syn	0.569832	0.0288693	0.268597	85	(0.01, 2, 1)	0	0	0.30567	higher
92	receptor similarity	Receptors	H3	clear	0.566235	0.0432395	0.148789	75	(0.01, 3, 1)	1	0	0.30567	higher
93	receptor similarity	Celltype	Endo	clear	0.560501	0.0676113	-0.131123	51	(0.1, 1.5, 1)	0	0	0.30567	higher
94	receptor similarity	Cortical expansion	devexp	syn	0.556193	0.044982	-0.0492029	58	(0.1, 3, 1)	0	0	0.30567	higher
95	receptor similarity	Celltype	OPC	mis	0.552886	0.0758824	-0.0175067	176	(0.9, 3, 0.1)	0	0	0.30567	higher
96	receptor similarity	Celltype	Neuro-Ex	syn	0.552124	0.0299666	0.186433	83	(0.01, 2.5, 1)	1	0	0.30567	higher
97	receptor similarity	Receptors	MOR	spread	0.550429	0.0226448	0.1096	301	(0.9, 2.9, 0.1)	1	0	0.30567	higher
98	receptor similarity	Receptors	GABAa	spread	0.549282	0.0230667	0.103623	264	(0.7, 3, 0.1)	1	0	0.30567	higher
99	receptor similarity	Receptors	mGluR5	spread	0.548322	0.0269185	0.187261	255	(0.7, 3, 0.1)	1	0	0.30567	higher
100	receptor similarity	Receptors	M1	mis	0.544759	0.0549869	-0.0732721	67	(0.3, 3, 1)	0	0	0.30567	higher
101	receptor similarity	Receptors	NET	clear	0.541799	0.0258521	0.117707	29999	(0.01, 1.5, 1)	0	0	0.30567	higher
102	receptor similarity	Receptors	NMDA	syn	0.540392	0.0295586	0.117629	77	(0.01, 2.5, 1)	1	0	0.30567	higher
103	receptor similarity	Celltype	Neuro-Ex	spread	0.539272	0.0275263	0.134218	280	(0.7, 3, 0.1)	0	0	0.30567	higher
104	receptor similarity	Receptors	DAT	spread	0.538494	0.0346284	0.196547	191	(0.5, 3, 0.3)	0	0	0.30567	higher
105	receptor similarity	Receptors	D1	spread	0.538245	0.0283434	0.194201	313	(0.7, 2.5, 0.1)	1	0	0.30567	higher
106	receptor similarity	Celltype	Neuro-In	syn	0.53735	0.027738	0.130572	98	(0.01, 2, 1)	1	0	0.30567	higher
107	receptor similarity	metabolism	cmr02	spread	0.535316	0.0346268	0.184461	87	(0.3, 3, 1)	1	0	0.30567	higher
108	receptor similarity	Receptors	5HT6	syn	0.535299	0.038986	0.157298	61	(0.3, 3, 1)	0	0	0.30567	higher
109	receptor similarity	metabolism	cmrglc	clear	0.535205	0.0301747	0.195945	639	(0.01, 3, 1)	1	0	0.30567	higher
110	receptor similarity	metabolism	cbv	syn	0.532854	0.0366704	0.0944159	70	(0.01, 3, 1)	0	0	0.30567	higher
111	receptor similarity	Celltype	Neuro-In	spread	0.532792	0.0291213	0.136506	281	(0.7, 3, 0.1)	0	0	0.30567	higher
112	receptor similarity	Celltype	Astro	mis	0.528014	0.0668891	0.054403	131	(0.7, 1.9, 1)	0	0	0.30567	higher
113	receptor similarity	Receptors	A4B2	clear	0.525794	0.0415362	0.0767876	79	(0.01, 3, 1)	1	0	0.30567	higher
114	receptor similarity	Receptors	NMDA	spread	0.523549	0.051618	0.054836	253	(0.5, 2.5, 0.1)	0	0	0.30567	higher
115	receptor similarity	Receptors	5HT1b	spread	0.514801	0.0255758	-0.0228077	300	(0.9, 2.5, 0.1)	0	0	0.30567	higher
116	receptor similarity	Receptors	MOR	syn	0.508511	0.0287285	0.081748	115	(0.01, 1.5, 1)	0	0	0.30567	higher
117	receptor similarity	metabolism	cmrglc	spread	0.505056	0.03002	0.0110321	285	(0.9, 2.5, 0.1)	0	0	0.30567	higher
118	receptor similarity	Receptors	D1	syn	0.504469	0.0313837	0.12881	101	(0.01, 1.9, 1)	0	0	0.30567	higher
119	receptor similarity	metabolism	cmr02	clear	0.502715	0.0293131	0.113558	207	(0.01, 3, 1)	0	0	0.30567	higher
120	receptor similarity	Receptors	A4B2	spread	0.494207	0.024926	-0.0581928	274	(0.9, 2.9, 0.1)	0	0	0.30567	higher
121	receptor similarity	Receptors	GABAa	clear	0.489812	0.0340873	0.0195777	111	(0.01, 3, 1)	0	0	0.30567	higher
122	receptor similarity	Celltype	Oligo	syn	0.485098	0.0331812	-0.11822	106	(0.01, 1.9, 1)	0	0	0.30567	higher
123	receptor similarity	Receptors	H3	spread	0.478543	0.0318118	0.00566425	247	(0.9, 3, 0.1)	0	0	0.30567	higher
124	receptor similarity	AD-realted	APOE	clear	0.476942	0.0329162	0.108642	159	(0.01, 3, 1)	0	0	0.30567	higher
125	receptor similarity	Receptors	5HTT	spread	0.472068	0.0326153	-0.00147731	270	(0.7, 3, 0.1)	0	0	0.30567	higher
126	receptor similarity	Celltype	Endo	spread	0.46971	0.037508	0.00292722	306	(0.7, 2.5, 0.1)	0	0	0.30567	higher
127	receptor similarity	Receptors	CB1	mis	0.469095	0.0378192	0.0109736	78	(0.01, 2.9, 1)	0	0	0.30567	higher
128	receptor similarity	Receptors	VAChT	spread	0.468065	0.0368662	-5.06945e-06	246	(0.9, 3, 0.1)	0	0	0.30567	higher
129	receptor similarity	metabolism	cbf	spread	0.465055	0.0364415	-0.0386491	234	(0.9, 3, 0.1)	0	0	0.30567	higher
130	receptor similarity	Receptors	VAChT	syn	0.464209	0.0331631	-0.140074	108	(0.01, 1.9, 1)	0	0	0.30567	higher
131	receptor similarity	Celltype	Oligo	spread	0.462209	0.0298851	-0.142245	253	(0.9, 3, 0.1)	0	0	0.30567	higher
132	receptor similarity	Celltype	Micro	mis	0.458338	0.0579344	-0.203684	95	(0.01, 2.5, 1)	0	0	0.30567	higher
133	receptor similarity	Receptors	5HT6	mis	0.454257	0.0478727	-0.0216598	69	(0.3, 3, 1)	0	0	0.30567	higher
134	receptor similarity	Receptors	mGluR5	syn	0.441954	0.0384245	0.00072422	62	(0.01, 2.9, 1)	0	0	0.30567	higher
135	receptor similarity	Microstructure	genepc1	clear	0.428214	0.0363902	0.0306389	109	(0.3, 3, 1)	0	0	0.30567	higher
136	receptor similarity	Celltype	Neuro-In	clear	0.416861	0.0616547	-0.214953	87	(0.01, 0.9, 1)	0	0	0.30567	higher
137	receptor similarity	Celltype	Neuro-Ex	clear	0.415194	0.0641161	-0.245173	79	(0.01, 1, 1)	0	0	0.30567	higher
138	receptor similarity	Microstructure	myelinmap	syn	0.414952	0.0534835	-0.340676	60	(0.01, 3, 1)	0	0	0.30567	higher
139	receptor similarity	metabolism	cbv	mis	0.414629	0.0711887	-0.323678	96	(0.7, 3, 1)	0	0	0.30567	higher
140	receptor similarity	Receptors	NMDA	clear	0.413803	0.0540567	-0.123362	97	(0.01, 1, 1)	0	0	0.30567	higher
141	receptor similarity	Microstructure	myelinmap	clear	0.41182	0.0592101	0.0716726	29999	(0.9, 3, 1)	0	0	0.30567	higher
142	receptor similarity	Celltype	Endo	mis	0.392837	0.0610974	-0.13553	81	(0.3, 3, 1)	0	0	0.30567	higher
143	receptor similarity	Receptors	NMDA	mis	0.383908	0.0594388	-0.254731	71	(0.3, 3, 1)	0	0	0.30567	higher
144	receptor similarity	Celltype	Neuro-Ex	mis	0.379611	0.0581014	-0.206669	89	(0.01, 3, 1)	0	0	0.30567	higher
145	receptor similarity	Receptors	5HT6	clear	0.37745	0.0502188	-0.215268	103	(0.1, 3, 1)	0	0	0.30567	higher
146	receptor similarity	Receptors	H3	syn	0.368962	0.0466211	-0.48673	99	(0.01, 1.9, 1)	0	0	0.30567	higher
147	receptor similarity	Receptors	M1	clear	0.355347	0.0604529	-0.198357	100	(0.1, 3, 1)	0	0	0.30567	higher
148	receptor similarity	Receptors	mGluR5	mis	0.353454	0.048389	-0.340286	71	(0.01, 2.9, 1)	0	0	0.30567	higher
149	receptor similarity	Receptors	mGluR5	clear	0.350332	0.0708772	-0.273067	66	(0.3, 3, 1)	0	0	0.30567	higher
150	receptor similarity	Receptors	MOR	mis	0.347425	0.0469586	-0.493704	130	(0.01, 1.9, 1)	0	0	0.30567	higher
151	receptor similarity	Receptors	GABAa	syn	0.34415	0.0522695	-0.680642	63	(0.01, 3, 1)	0	0	0.30567	higher
152	receptor similarity	Celltype	Neuro-In	mis	0.340761	0.0605587	-0.364289	90	(0.01, 2.9, 1)	0	0	0.30567	higher
153	receptor similarity	Receptors	DAT	clear	0.336186	0.0714799	-0.552743	33	(0.01, 3, 1)	0	0	0.30567	higher
154	receptor similarity	Receptors	D1	mis	0.329285	0.0552846	-0.40131	131	(0.01, 1.9, 1)	0	0	0.30567	higher
155	receptor similarity	metabolism	cmr02	syn	0.324728	0.0624926	-0.832497	60	(0.01, 3, 1)	0	0	0.30567	higher
156	receptor similarity	Receptors	NET	syn	0.322204	0.0644184	-0.789004	63	(0.01, 3, 1)	0	0	0.30567	higher
157	receptor similarity	Microstructure	genepc1	syn	0.319372	0.0680341	-0.773765	61	(0.01, 3, 1)	0	0	0.30567	higher
158	receptor similarity	Receptors	DAT	mis	0.315411	0.0608783	-0.457548	175	(0.01, 1.9, 1)	0	0	0.30567	higher
159	receptor similarity	Receptors	A4B2	syn	0.313606	0.0631703	-0.739974	57	(0.01, 3, 1)	0	0	0.30567	higher
160	receptor similarity	metabolism	cmrglc	syn	0.29234	0.0663018	-0.89319	58	(0.01, 3, 1)	0	0	0.30567	lower
161	receptor similarity	Receptors	5HT2a	clear	0.291144	0.0850991	-0.546263	2127	(0.3, 0.1, 1)	0	0	0.30567	lower
162	receptor similarity	Cortical expansion	devexp	clear	0.285731	0.078069	-0.520232	121	(0.01, 0.5, 1)	0	0	0.30567	lower
163	receptor similarity	metabolism	cbf	syn	0.285725	0.0679579	-0.898575	58	(0.01, 3, 1)	0	0	0.30567	lower
164	receptor similarity	AD-realted	APOE	syn	0.276377	0.0753838	-0.9696	58	(0.01, 3, 1)	0	0	0.30567	lower
165	receptor similarity	Microstructure	myelinmap	mis	0.276192	0.0867878	-0.731045	61	(0.1, 3, 1)	0	0	0.30567	lower
166	receptor similarity	Cortical expansion	scalingpnc	clear	0.273069	0.0847995	-0.634259	137	(0.01, 0.5, 1)	0	0	0.30567	lower
167	receptor similarity	Receptors	D1	clear	0.271585	0.0877271	-0.909961	84	(0.01, 1, 1)	0	0	0.30567	lower
168	receptor similarity	Receptors	5HT1b	syn	0.268228	0.0714274	-0.920293	59	(0.01, 3, 1)	0	0	0.30567	lower
169	receptor similarity	metabolism	cbv	clear	0.26803	0.0638322	-0.862004	142	(0.01, 0.5, 1)	0	0	0.30567	lower
170	receptor similarity	Celltype	Micro	clear	0.267029	0.0746043	-0.753661	154	(0.01, 0.5, 1)	0	0	0.30567	lower
171	receptor similarity	Receptors	NET	mis	0.266545	0.085425	-0.881861	62	(0.01, 3, 1)	0	0	0.30567	lower
172	receptor similarity	AD-realted	Abeta	clear	0.266232	0.0909312	-0.708932	1196	(0.01, 0.1, 0.1)	0	0	0.30567	lower
173	receptor similarity	Microstructure	genepc1	mis	0.264307	0.088915	-0.794229	64	(0.3, 3, 1)	0	0	0.30567	lower
174	receptor similarity	Cortical expansion	scaling	clear	0.258331	0.0873438	-0.774342	122	(0.01, 0.5, 1)	0	0	0.30567	lower
175	receptor similarity	Cortical expansion	evoexp	clear	0.258258	0.0879347	-0.619939	94	(0.01, 0.5, 1)	0	0	0.30567	lower
176	receptor similarity	Celltype	OPC	clear	0.256595	0.0734346	-0.727271	84	(0.01, 0.9, 1)	0	0	0.30567	lower
177	receptor similarity	metabolism	cmr02	mis	0.256044	0.085089	-0.881504	59	(0.01, 3, 1)	0	0	0.30567	lower
178	receptor similarity	Cortical expansion	scalingnih	clear	0.253478	0.0891458	-0.787591	120	(0.01, 0.5, 1)	0	0	0.30567	lower
179	receptor similarity	Receptors	GABAa	mis	0.252279	0.0846776	-0.89454	57	(0.01, 3, 1)	0	0	0.30567	lower
180	receptor similarity	Receptors	5HTT	mis	0.248542	0.0864902	-0.763805	153	(0.01, 1.5, 1)	0	0	0.30567	lower
181	receptor similarity	AD-realted	APOE	mis	0.247447	0.0903985	-0.925792	58	(0.01, 3, 1)	0	0	0.30567	lower
182	receptor similarity	Receptors	D2	clear	0.240999	0.0993312	-0.53858	72	(0.3, 3, 0.1)	0	0	0.30567	lower
183	receptor similarity	Cortical expansion	scalinghcp	clear	0.240304	0.0883352	-0.845107	110	(0.01, 0.5, 1)	0	0	0.30567	lower
184	receptor similarity	Receptors	H3	mis	0.237772	0.0921801	-0.9077	1074	(0.01, 1, 0.1)	0	0	0.30567	lower
185	receptor similarity	Receptors	VAChT	mis	0.237701	0.0907113	-0.858042	735	(0.01, 1.5, 0.1)	0	0	0.30567	lower
186	receptor similarity	Receptors	A4B2	mis	0.237095	0.0932665	-0.913851	875	(0.01, 1, 0.1)	0	0	0.30567	lower
187	receptor similarity	Receptors	CB1	clear	0.236336	0.0961609	-0.872234	967	(0.01, 0.1, 0.1)	0	0	0.30567	lower
188	receptor similarity	Celltype	Astro	clear	0.236273	0.0801486	-0.854758	78	(0.01, 0.9, 1)	0	0	0.30567	lower
189	receptor similarity	metabolism	cmrglc	mis	0.234493	0.0947711	-0.918571	712	(0.01, 1, 0.1)	0	0	0.30567	lower
190	receptor similarity	Receptors	5HT1b	mis	0.232495	0.0948234	-0.928278	785	(0.01, 0.9, 0.1)	0	0	0.30567	lower
191	receptor similarity	Celltype	Oligo	mis	0.23174	0.095453	-0.90438	906	(0.01, 0.9, 0.1)	0	0	0.30567	lower
192	receptor similarity	metabolism	cbf	mis	0.230945	0.0962425	-0.915471	1010	(0.01, 0.5, 0.1)	0	0	0.30567	lower
193	receptor similarity	Receptors	5HT4	clear	0.226475	0.0980172	-0.908522	953	(0.01, 0.1, 0.1)	0	0	0.30567	lower
194	receptor similarity	Receptors	MOR	clear	0.226454	0.0960102	-0.890396	53	(0.01, 1, 1)	0	0	0.30567	lower
195	receptor similarity	AD-realted	MAPT	clear	0.206194	0.100605	-1.00811	974	(0.01, 0.1, 0.1)	0	0	0.30567	lower
196	receptor similarity	Microstructure	thickness	clear	0.201433	0.102334	-1.0256	838	(0.01, 0.1, 0.1)	0	0	0.30567	lower
197	receptor similarity	Receptors	5HT1a	clear	0.198526	0.102783	-1.03957	848	(0.01, 0.1, 0.1)	0	0	0.30567	lower
1	laminar similarity	Receptors	5HT4	mis	0.651348	0.0431359	0.308184	349	(0.7, 2.9, 0.1)	1	0	0.201688	higher
2	laminar similarity	AD-realted	MAPT	mis	0.651334	0.0274955	0.41341	4418	(0.9, 1.5, 0.1)	1	0	0.201688	higher
3	laminar similarity	AD-realted	MAPT	spread	0.626761	0.0196618	0.23908	1030	(0.7, 3, 0.1)	0	0	0.201688	higher
4	laminar similarity	Receptors	5HT4	spread	0.609827	0.0242106	0.295241	1386	(0.9, 3, 1)	0	0	0.201688	higher
5	laminar similarity	Receptors	5HT4	syn	0.59022	0.0436274	0.229259	532	(0.9, 1, 0.1)	0	0	0.201688	higher
6	laminar similarity	AD-realted	MAPT	syn	0.587613	0.0235148	0.250194	367	(0.9, 2, 0.1)	0	0	0.201688	higher
7	laminar similarity	Cortical expansion	scalingnih	syn	0.587455	0.0471376	0.102073	171	(0.9, 1.9, 1)	1	0	0.201688	higher
8	laminar similarity	Receptors	5HT1a	spread	0.582378	0.0215866	0.164324	4334	(0.9, 3, 1)	1	0	0.201688	higher
9	laminar similarity	Cortical expansion	scaling	syn	0.571733	0.042271	0.0948142	112	(0.9, 2.9, 1)	1	0	0.201688	higher
10	laminar similarity	metabolism	cbf	clear	0.566959	0.0305151	0.279329	29999	(0.9, 1.5, 0.1)	1	0	0.201688	higher
11	laminar similarity	Cortical expansion	scalingnih	mis	0.566583	0.0600919	0.0133349	194	(0.9, 3, 1)	0	0	0.201688	higher
12	laminar similarity	Receptors	MOR	spread	0.557794	0.0269824	0.0733913	1582	(0.9, 3, 1)	1	0	0.201688	higher
13	laminar similarity	Microstructure	thickness	spread	0.552364	0.0250366	0.153081	2217	(0.9, 3, 1)	1	0	0.201688	higher
14	laminar similarity	Cortical expansion	scalinghcp	syn	0.548442	0.0691305	-0.321386	396	(0.9, 0.9, 1)	1	0	0.201688	higher
15	laminar similarity	Cortical expansion	scaling	mis	0.530481	0.0565635	0.0460291	267	(0.9, 3, 0.1)	0	0	0.201688	higher
16	laminar similarity	Receptors	D2	mis	0.522425	0.0524611	0.163272	871	(0.9, 1.5, 0.1)	1	0	0.201688	higher
17	laminar similarity	Cortical expansion	scalinghcp	mis	0.515005	0.0496039	0.0803035	206	(0.9, 3, 1)	0	0	0.201688	higher
18	laminar similarity	Receptors	CB1	spread	0.500463	0.0269289	-0.000381377	1431	(0.9, 3, 1)	1	0	0.201688	higher
19	laminar similarity	Receptors	D2	spread	0.492579	0.0289428	-0.0347945	9416	(0.9, 3, 1)	0	0	0.201688	higher
20	laminar similarity	Receptors	5HT1b	clear	0.481829	0.0362334	0.11679	29999	(0.9, 3, 0.1)	1	0	0.201688	higher
21	laminar similarity	Celltype	Oligo	clear	0.48091	0.063691	-0.24464	413	(0.5, 0.5, 1)	1	0	0.201688	higher
22	laminar similarity	Cortical expansion	evoexp	spread	0.473828	0.031606	-0.0301939	1615	(0.9, 3, 1)	1	0	0.201688	higher
23	laminar similarity	Receptors	VAChT	clear	0.470484	0.0795281	-0.82608	136	(0.7, 0.5, 1)	1	0	0.201688	higher
24	laminar similarity	Receptors	D2	syn	0.457765	0.0528895	0.0724539	616	(0.9, 0.9, 0.1)	0	0	0.201688	higher
25	laminar similarity	metabolism	cmrglc	clear	0.43795	0.041485	0.0923217	29999	(0.9, 3, 0.1)	1	0	0.201688	higher
26	laminar similarity	Receptors	5HTT	clear	0.435016	0.0856907	-1.13407	117	(0.5, 1.5, 0.1)	1	0	0.201688	higher
27	laminar similarity	AD-realted	Abeta	spread	0.434197	0.0413819	-0.0429947	2073	(0.9, 3, 0.5)	1	0	0.201688	higher
28	laminar similarity	Cortical expansion	scalinghcp	spread	0.428611	0.0342687	-0.209552	444	(0.01, 0.9, 0.9)	0	0	0.201688	higher
29	laminar similarity	Receptors	NET	clear	0.426195	0.0451104	0.00690247	29999	(0.9, 3, 1)	1	0	0.201688	higher
30	laminar similarity	Receptors	A4B2	clear	0.404082	0.051047	-0.00636303	132	(0.9, 1.5, 0.1)	1	0	0.201688	higher
31	laminar similarity	Cortical expansion	scaling	spread	0.39353	0.0420744	-0.327469	1712	(0.01, 0.5, 1)	0	0	0.201688	higher
32	laminar similarity	Receptors	H3	clear	0.373123	0.0525434	-0.0445668	83	(0.9, 3, 0.1)	1	0	0.201688	higher
33	laminar similarity	metabolism	cmr02	clear	0.368489	0.0494907	-0.069408	29999	(0.9, 3, 0.1)	1	0	0.201688	higher
34	laminar similarity	Cortical expansion	scalingnih	spread	0.348327	0.0509168	-0.634776	1798	(0.01, 0.5, 1)	0	0	0.201688	higher
35	laminar similarity	Celltype	Endo	clear	0.335797	0.0470658	-0.120076	87	(0.9, 3, 0.1)	1	0	0.201688	higher
36	laminar similarity	Receptors	GABAa	clear	0.320657	0.0447975	-0.174162	29999	(0.9, 3, 1)	1	0	0.201688	higher
37	laminar similarity	Microstructure	thickness	mis	0.314923	0.0557374	-0.280083	923	(0.9, 1.5, 0.1)	0	0	0.201688	higher
38	laminar similarity	Receptors	5HT1a	mis	0.313652	0.0566235	-0.169145	2174	(0.9, 1.5, 0.1)	0	0	0.201688	higher
39	laminar similarity	Cortical expansion	scalingpnc	spread	0.296041	0.0462592	-0.293799	694	(0.9, 3, 1)	1	0	0.201688	higher
40	laminar similarity	Receptors	5HT1a	syn	0.276633	0.0717796	-0.346831	223	(0.9, 1.5, 0.1)	0	0	0.201688	higher
41	laminar similarity	Cortical expansion	devexp	mis	0.273295	0.0768372	-0.366986	103	(0.9, 3, 0.1)	1	0	0.201688	higher
42	laminar similarity	AD-realted	Abeta	mis	0.267239	0.059974	-0.143596	29999	(0.9, 3, 0.1)	0	0	0.201688	higher
43	laminar similarity	Receptors	M1	clear	0.264596	0.0720725	-0.375	29999	(0.9, 0.1, 1)	1	0	0.201688	higher
44	laminar similarity	AD-realted	APOE	clear	0.264496	0.0618703	-0.160808	29999	(0.9, 3, 0.1)	1	0	0.201688	higher
45	laminar similarity	Microstructure	thickness	syn	0.262522	0.0665014	-0.39645	229	(0.9, 1.5, 0.1)	0	0	0.201688	higher
46	laminar similarity	Cortical expansion	devexp	spread	0.258579	0.0413617	-0.369433	487	(0.9, 3, 1)	0	0	0.201688	higher
47	laminar similarity	Cortical expansion	devexp	syn	0.257662	0.079852	-0.394282	65	(0.9, 3, 0.1)	0	0	0.201688	higher
48	laminar similarity	Cortical expansion	scalingpnc	syn	0.250482	0.050141	-0.413342	157	(0.9, 3, 0.1)	0	0	0.201688	higher
49	laminar similarity	AD-realted	Abeta	syn	0.249509	0.0534497	-0.514801	564	(0.9, 3, 0.1)	0	0	0.201688	higher
50	laminar similarity	Receptors	5HT6	clear	0.248662	0.0497465	-0.400633	5794	(0.01, 0.5, 0.1)	1	0	0.201688	higher
51	laminar similarity	Celltype	Oligo	syn	0.228953	0.0799223	-0.661641	6621	(0.01, 0.1, 0.1)	0	0	0.201688	higher
52	laminar similarity	Celltype	Astro	mis	0.225123	0.0512545	-0.261738	29999	(0.9, 3, 1)	1	0	0.201688	higher
53	laminar similarity	metabolism	cbv	spread	0.225064	0.070572	-0.620444	292	(0.01, 1.5, 0.3)	1	0	0.201688	higher
54	laminar similarity	Receptors	mGluR5	clear	0.222754	0.0565807	-0.357972	504	(0.1, 0.5, 1)	1	0	0.201688	higher
55	laminar similarity	Receptors	mGluR5	spread	0.21544	0.045515	-0.406419	29999	(0.9, 3, 1)	0	0	0.201688	higher
56	laminar similarity	Celltype	Astro	syn	0.21544	0.0493723	-0.324899	409	(0.9, 3, 0.1)	0	0	0.201688	higher
57	laminar similarity	Celltype	Neuro-Ex	mis	0.213814	0.0797119	-0.785492	2628	(0.9, 1, 0.1)	1	0	0.201688	higher
58	laminar similarity	Receptors	NMDA	clear	0.210377	0.0567025	-0.709367	471	(0.01, 0.5, 0.3)	1	0	0.201688	higher
59	laminar similarity	Receptors	VAChT	syn	0.206459	0.0880711	-0.96474	6637	(0.01, 0.1, 0.1)	0	0	0.201688	higher
60	laminar similarity	Receptors	5HT6	spread	0.205526	0.0533381	-0.292284	29999	(0.9, 3, 1)	0	0	0.201688	higher
61	laminar similarity	Celltype	Neuro-Ex	syn	0.204499	0.078781	-1.13676	421	(0.9, 0.9, 1)	0	0	0.201688	higher
62	laminar similarity	metabolism	cbv	syn	0.20157	0.0521677	-0.307029	149	(0.7, 3, 1)	0	0	0.201688	lower
63	laminar similarity	Receptors	5HTT	syn	0.200755	0.0779789	-0.805408	765	(0.01, 0.1, 0.1)	0	0	0.201688	lower
64	laminar similarity	Cortical expansion	evoexp	clear	0.198119	0.0714489	-0.530462	108	(0.01, 0.5, 1)	0	0	0.201688	lower
65	laminar similarity	metabolism	cbv	mis	0.19805	0.0672021	-0.784737	161	(0.01, 1.5, 1)	0	0	0.201688	lower
66	laminar similarity	Receptors	H3	syn	0.197497	0.0908517	-1.03031	1108	(0.01, 0.1, 1)	0	0	0.201688	lower
67	laminar similarity	Cortical expansion	scalingpnc	mis	0.196677	0.0853332	-0.764685	69	(0.9, 2.9, 1)	0	0	0.201688	lower
68	laminar similarity	Receptors	A4B2	syn	0.193678	0.0929788	-1.07104	1112	(0.01, 0.1, 1)	0	0	0.201688	lower
69	laminar similarity	Microstructure	genepc1	syn	0.19124	0.0623999	-0.94982	232	(0.01, 0.9, 1)	1	0	0.201688	lower
70	laminar similarity	Receptors	5HT2a	spread	0.188424	0.0676285	-0.515612	93	(0.01, 0.1, 1)	1	0	0.201688	lower
71	laminar similarity	Celltype	Astro	spread	0.18099	0.0817345	-0.810511	189	(0.01, 0.5, 1)	0	0	0.201688	lower
72	laminar similarity	Microstructure	genepc1	clear	0.180117	0.0828074	-0.912435	73	(0.01, 0.1, 1)	0	0	0.201688	lower
73	laminar similarity	metabolism	cbf	syn	0.17873	0.0927898	-1.07908	1099	(0.01, 0.1, 1)	0	0	0.201688	lower
74	laminar similarity	Microstructure	myelinmap	syn	0.177405	0.0640804	-1.05991	573	(0.01, 0.9, 0.3)	1	0	0.201688	lower
75	laminar similarity	Receptors	5HT1b	syn	0.176826	0.0939746	-1.07537	1099	(0.01, 0.1, 1)	0	0	0.201688	lower
76	laminar similarity	Celltype	Endo	syn	0.17666	0.0798994	-1.06865	17375	(0.9, 0.5, 0.1)	0	0	0.201688	lower
77	laminar similarity	Celltype	Neuro-In	spread	0.173137	0.0748732	-0.692698	156	(0.9, 3, 0.1)	1	0	0.201688	lower
78	laminar similarity	Receptors	MOR	syn	0.172248	0.0877832	-0.924609	84	(0.01, 0.1, 1)	0	0	0.201688	lower
79	laminar similarity	Microstructure	genepc1	spread	0.171704	0.0763292	-0.516253	116	(0.01, 0.1, 1)	0	0	0.201688	lower
80	laminar similarity	AD-realted	APOE	syn	0.171529	0.0746644	-1.08291	1586	(0.01, 0.9, 0.1)	0	0	0.201688	lower
81	laminar similarity	Microstructure	myelinmap	clear	0.170998	0.0862224	-0.984093	71	(0.01, 0.1, 1)	0	0	0.201688	lower
82	laminar similarity	metabolism	cmrglc	syn	0.169691	0.09356	-1.0869	1099	(0.01, 0.1, 1)	0	0	0.201688	lower
83	laminar similarity	Receptors	NET	syn	0.168241	0.0937367	-1.10906	1090	(0.01, 0.1, 1)	0	0	0.201688	lower
84	laminar similarity	Celltype	OPC	spread	0.167072	0.0871898	-0.973831	317	(0.01, 0.1, 1)	1	0	0.201688	lower
85	laminar similarity	Receptors	D1	spread	0.166874	0.079588	-0.853607	95	(0.01, 0.1, 1)	1	0	0.201688	lower
86	laminar similarity	Celltype	Micro	spread	0.166765	0.0738287	-0.617896	161	(0.9, 3, 0.1)	1	0	0.201688	lower
87	laminar similarity	metabolism	cmr02	syn	0.166267	0.0720087	-1.12894	1787	(0.01, 0.9, 0.1)	0	0	0.201688	lower
88	laminar similarity	metabolism	cbv	clear	0.165689	0.0911995	-1.05384	57	(0.01, 0.1, 1)	0	0	0.201688	lower
89	laminar similarity	Receptors	mGluR5	syn	0.165323	0.0940172	-1.0729	112	(0.01, 0.1, 1)	0	0	0.201688	lower
90	laminar similarity	Microstructure	myelinmap	spread	0.165309	0.081119	-0.738603	122	(0.01, 0.1, 1)	0	0	0.201688	lower
91	laminar similarity	Cortical expansion	scalingpnc	clear	0.165044	0.0898569	-1.12625	253	(0.7, 0.1, 1)	0	0	0.201688	lower
92	laminar similarity	Cortical expansion	evoexp	syn	0.164543	0.0914364	-0.850936	474	(0.01, 0.1, 0.1)	0	0	0.201688	lower
93	laminar similarity	Cortical expansion	scaling	clear	0.164424	0.0872633	-1.02776	63	(0.01, 0.1, 1)	0	0	0.201688	lower
94	laminar similarity	Receptors	NMDA	syn	0.16417	0.0901162	-1.02282	115	(0.01, 0.1, 1)	0	0	0.201688	lower
95	laminar similarity	Cortical expansion	scalinghcp	clear	0.163841	0.0898956	-1.07109	58	(0.01, 0.1, 1)	0	0	0.201688	lower
96	laminar similarity	Receptors	DAT	syn	0.162661	0.0857314	-0.996987	76	(0.01, 0.1, 1)	1	0	0.201688	lower
97	laminar similarity	Cortical expansion	devexp	clear	0.162546	0.0809275	-0.886468	83	(0.01, 0.1, 1)	0	0	0.201688	lower
98	laminar similarity	Celltype	Neuro-In	syn	0.162102	0.0868338	-0.991261	86	(0.01, 0.1, 1)	0	0	0.201688	lower
99	laminar similarity	Celltype	Micro	clear	0.161788	0.0888528	-1.02659	75	(0.01, 0.1, 1)	0	0	0.201688	lower
100	laminar similarity	Cortical expansion	scalingnih	clear	0.161715	0.0885459	-1.05534	59	(0.01, 0.1, 1)	0	0	0.201688	lower
101	laminar similarity	Receptors	5HT2a	clear	0.161288	0.0825186	-0.632903	815	(0.7, 0.1, 1)	0	0	0.201688	lower
102	laminar similarity	Receptors	MOR	clear	0.161056	0.0806987	-0.948592	83	(0.01, 0.5, 1)	0	0	0.201688	lower
103	laminar similarity	Receptors	DAT	mis	0.160886	0.0862733	-1.01395	59	(0.01, 1.5, 1)	0	0	0.201688	lower
104	laminar similarity	AD-realted	Abeta	clear	0.160705	0.0782148	-0.802036	143	(0.01, 0.5, 1)	0	0	0.201688	lower
105	laminar similarity	Microstructure	genepc1	mis	0.159536	0.0769613	-1.10006	1267	(0.01, 1, 0.3)	0	0	0.201688	lower
106	laminar similarity	Receptors	CB1	syn	0.158331	0.0915926	-1.08504	80	(0.01, 0.1, 1)	0	0	0.201688	lower
107	laminar similarity	Receptors	D1	mis	0.157838	0.0881369	-1.05172	56	(0.01, 0.9, 1)	0	0	0.201688	lower
108	laminar similarity	Receptors	DAT	spread	0.15753	0.0887281	-0.993427	77	(0.01, 1, 1)	0	0	0.201688	lower
109	laminar similarity	Celltype	OPC	mis	0.156818	0.0899791	-1.05003	79	(0.01, 0.1, 1)	0	0	0.201688	lower
110	laminar similarity	AD-realted	Cluster6	mis	0.156789	0.0896597	-1.04603	77	(0.01, 0.1, 1)	0	0	0.201688	lower
111	laminar similarity	AD-realted	Cluster6	clear	0.156789	0.0896597	-1.04603	77	(0.01, 0.1, 1)	0	0	0.201688	lower
112	laminar similarity	AD-realted	Cluster7	syn	0.156789	0.0896597	-1.04603	77	(0.01, 0.1, 1)	1	0	0.201688	lower
113	laminar similarity	AD-realted	Cluster7	spread	0.156789	0.0896597	-1.04603	77	(0.01, 0.1, 1)	0	0	0.201688	lower
114	laminar similarity	AD-realted	Cluster7	mis	0.156789	0.0896597	-1.04603	77	(0.01, 0.1, 1)	0	0	0.201688	lower
115	laminar similarity	AD-realted	Cluster5	mis	0.156789	0.0896597	-1.04603	77	(0.01, 0.1, 1)	0	0	0.201688	lower
116	laminar similarity	AD-realted	Cluster6	spread	0.156789	0.0896597	-1.04603	77	(0.01, 0.1, 1)	0	0	0.201688	lower
117	laminar similarity	AD-realted	Cluster6	syn	0.156789	0.0896597	-1.04603	77	(0.01, 0.1, 1)	1	0	0.201688	lower
118	laminar similarity	AD-realted	Cluster4	syn	0.156789	0.0896597	-1.04603	77	(0.01, 0.1, 1)	1	0	0.201688	lower
119	laminar similarity	AD-realted	Cluster4	spread	0.156789	0.0896597	-1.04603	77	(0.01, 0.1, 1)	0	0	0.201688	lower
120	laminar similarity	AD-realted	Cluster3	mis	0.156789	0.0896597	-1.04603	77	(0.01, 0.1, 1)	0	0	0.201688	lower
121	laminar similarity	AD-realted	Cluster3	spread	0.156789	0.0896597	-1.04603	77	(0.01, 0.1, 1)	0	0	0.201688	lower
122	laminar similarity	AD-realted	Cluster3	syn	0.156789	0.0896597	-1.04603	77	(0.01, 0.1, 1)	1	0	0.201688	lower
123	laminar similarity	AD-realted	Cluster2	clear	0.156789	0.0896597	-1.04603	77	(0.01, 0.1, 1)	0	0	0.201688	lower
124	laminar similarity	AD-realted	Cluster2	mis	0.156789	0.0896597	-1.04603	77	(0.01, 0.1, 1)	0	0	0.201688	lower
125	laminar similarity	AD-realted	Cluster2	spread	0.156789	0.0896597	-1.04603	77	(0.01, 0.1, 1)	0	0	0.201688	lower
126	laminar similarity	AD-realted	Cluster2	syn	0.156789	0.0896597	-1.04603	77	(0.01, 0.1, 1)	1	0	0.201688	lower
127	laminar similarity	AD-realted	Cluster4	mis	0.156789	0.0896597	-1.04603	77	(0.01, 0.1, 1)	0	0	0.201688	lower
128	laminar similarity	AD-realted	Cluster1	clear	0.156789	0.0896597	-1.04603	77	(0.01, 0.1, 1)	0	0	0.201688	lower
129	laminar similarity	AD-realted	Cluster1	mis	0.156789	0.0896597	-1.04603	77	(0.01, 0.1, 1)	0	0	0.201688	lower
130	laminar similarity	AD-realted	Cluster1	spread	0.156789	0.0896597	-1.04603	77	(0.01, 0.1, 1)	0	0	0.201688	lower
131	laminar similarity	AD-realted	Cluster1	syn	0.156789	0.0896597	-1.04603	77	(0.01, 0.1, 1)	1	0	0.201688	lower
132	laminar similarity	AD-realted	Cluster4	clear	0.156789	0.0896597	-1.04603	77	(0.01, 0.1, 1)	0	0	0.201688	lower
133	laminar similarity	AD-realted	Cluster5	syn	0.156789	0.0896597	-1.04603	77	(0.01, 0.1, 1)	1	0	0.201688	lower
134	laminar similarity	AD-realted	Cluster5	spread	0.156789	0.0896597	-1.04603	77	(0.01, 0.1, 1)	0	0	0.201688	lower
135	laminar similarity	AD-realted	Cluster3	clear	0.156789	0.0896597	-1.04603	77	(0.01, 0.1, 1)	0	0	0.201688	lower
136	laminar similarity	AD-realted	Cluster5	clear	0.156789	0.0896597	-1.04603	77	(0.01, 0.1, 1)	0	0	0.201688	lower
137	laminar similarity				0.156789	0.0896597	-1.04603	77	(0.01, 0.1, 1)	0	1	0.201688	lower
138	laminar similarity	AD-realted	Cluster7	clear	0.156789	0.0896597	-1.04603	77	(0.01, 0.1, 1)	0	0	0.201688	lower
139	laminar similarity	Celltype	Neuro-In	mis	0.156638	0.0900404	-1.0529	79	(0.01, 0.1, 1)	0	0	0.201688	lower
140	laminar similarity	Receptors	CB1	mis	0.156532	0.0901162	-1.06558	76	(0.01, 0.1, 1)	0	0	0.201688	lower
141	laminar similarity	Receptors	5HT2a	mis	0.156518	0.0900136	-1.05553	77	(0.01, 0.1, 1)	0	0	0.201688	lower
142	laminar similarity	Receptors	NMDA	mis	0.156474	0.0901216	-1.0601	77	(0.01, 0.1, 1)	0	0	0.201688	lower
143	laminar similarity	Celltype	OPC	syn	0.156429	0.0886242	-1.04992	69	(0.01, 0.1, 1)	0	0	0.201688	lower
144	laminar similarity	Celltype	Micro	mis	0.156398	0.0900598	-1.05194	79	(0.01, 0.1, 1)	0	0	0.201688	lower
145	laminar similarity	Receptors	5HT6	mis	0.156326	0.0900991	-1.05531	76	(0.01, 0.1, 1)	0	0	0.201688	lower
146	laminar similarity	Receptors	D1	syn	0.156277	0.092049	-1.06945	85	(0.01, 0.1, 1)	0	0	0.201688	lower
147	laminar similarity	Receptors	M1	mis	0.15604	0.0901461	-1.05737	76	(0.01, 0.1, 1)	0	0	0.201688	lower
148	laminar similarity	Receptors	GABAa	mis	0.155953	0.0901821	-1.05748	76	(0.01, 0.1, 1)	0	0	0.201688	lower
149	laminar similarity	Receptors	MOR	mis	0.155914	0.0902682	-1.06248	75	(0.01, 0.1, 1)	0	0	0.201688	lower
150	laminar similarity	Cortical expansion	evoexp	mis	0.155886	0.0901769	-1.05865	76	(0.01, 0.1, 1)	0	0	0.201688	lower
151	laminar similarity	Receptors	5HTT	mis	0.155874	0.0901646	-1.05349	78	(0.01, 0.1, 1)	0	0	0.201688	lower
152	laminar similarity	metabolism	cmr02	mis	0.155871	0.0901934	-1.05717	76	(0.01, 0.1, 1)	0	0	0.201688	lower
153	laminar similarity	Celltype	Endo	mis	0.155759	0.0901718	-1.05291	78	(0.01, 0.1, 1)	0	0	0.201688	lower
154	laminar similarity	Microstructure	myelinmap	mis	0.155673	0.0879763	-1.00225	75	(0.01, 1, 0.7)	0	0	0.201688	lower
155	laminar similarity	Receptors	mGluR5	mis	0.155625	0.09027	-1.06046	75	(0.01, 0.1, 1)	0	0	0.201688	lower
156	laminar similarity	AD-realted	APOE	mis	0.155596	0.0902364	-1.05803	76	(0.01, 0.1, 1)	0	0	0.201688	lower
157	laminar similarity	Receptors	GABAa	syn	0.155379	0.0952849	-1.13164	106	(0.01, 0.1, 1)	0	0	0.201688	lower
158	laminar similarity	Receptors	VAChT	mis	0.155143	0.0904658	-1.0652	74	(0.01, 0.1, 1)	0	0	0.201688	lower
159	laminar similarity	Receptors	NET	mis	0.155103	0.0903858	-1.06004	74	(0.01, 0.1, 1)	0	0	0.201688	lower
160	laminar similarity	metabolism	cmrglc	mis	0.154914	0.0904585	-1.06149	73	(0.01, 0.1, 1)	0	0	0.201688	lower
161	laminar similarity	Celltype	Neuro-Ex	clear	0.154913	0.0915676	-1.07979	66	(0.01, 0.1, 1)	0	0	0.201688	lower
162	laminar similarity	metabolism	cbf	mis	0.154849	0.090432	-1.06044	73	(0.01, 0.1, 1)	0	0	0.201688	lower
163	laminar similarity	Receptors	5HT1b	mis	0.154846	0.0904607	-1.06237	73	(0.01, 0.1, 1)	0	0	0.201688	lower
164	laminar similarity	Celltype	Oligo	mis	0.154806	0.0905281	-1.06233	74	(0.01, 0.1, 1)	0	0	0.201688	lower
165	laminar similarity	Receptors	H3	mis	0.1547	0.0905244	-1.06107	72	(0.01, 0.1, 1)	0	0	0.201688	lower
166	laminar similarity	Receptors	M1	syn	0.154531	0.0942984	-1.10175	100	(0.01, 0.1, 1)	0	0	0.201688	lower
167	laminar similarity	Receptors	A4B2	mis	0.154328	0.0905739	-1.06194	71	(0.01, 0.1, 1)	0	0	0.201688	lower
168	laminar similarity	Celltype	Micro	syn	0.154019	0.0901112	-1.06818	65	(0.01, 0.1, 1)	0	0	0.201688	lower
169	laminar similarity	AD-realted	MAPT	clear	0.153933	0.0955291	-1.13831	48	(0.01, 0.1, 1)	0	0	0.201688	lower
170	laminar similarity	Celltype	Astro	clear	0.153172	0.0924087	-1.08408	65	(0.01, 0.1, 1)	0	0	0.201688	lower
171	laminar similarity	Celltype	Neuro-In	clear	0.153158	0.0912193	-1.07129	65	(0.01, 0.1, 1)	0	0	0.201688	lower
172	laminar similarity	Celltype	Neuro-Ex	spread	0.152904	0.0655087	-1.24711	3041	(0.01, 0.9, 0.1)	0	0	0.201688	lower
173	laminar similarity	Receptors	5HT6	syn	0.152282	0.0951165	-1.14298	100	(0.01, 0.1, 1)	0	0	0.201688	lower
174	laminar similarity	Receptors	5HT4	clear	0.150558	0.0899037	-1.02483	73	(0.01, 0.1, 1)	0	0	0.201688	lower
175	laminar similarity	Celltype	OPC	clear	0.149357	0.0904388	-1.05133	304	(0.01, 0.5, 0.1)	0	0	0.201688	lower
176	laminar similarity	Receptors	D1	clear	0.14762	0.0894995	-1.05137	277	(0.01, 0.5, 0.1)	0	0	0.201688	lower
177	laminar similarity	Receptors	CB1	clear	0.146802	0.0893284	-1.2529	513	(0.5, 0.1, 1)	0	0	0.201688	lower
178	laminar similarity	Receptors	NMDA	spread	0.146745	0.0891102	-1.1192	69	(0.01, 0.1, 1)	0	0	0.201688	lower
179	laminar similarity	Receptors	5HT2a	syn	0.145272	0.0967508	-1.14802	77	(0.01, 0.1, 1)	0	0	0.201688	lower
180	laminar similarity	Receptors	D2	clear	0.145249	0.0959518	-1.12463	51	(0.01, 0.1, 1)	0	0	0.201688	lower
181	laminar similarity	Receptors	M1	spread	0.142245	0.0882274	-1.03376	53	(0.01, 0.1, 1)	0	0	0.201688	lower
182	laminar similarity	Receptors	5HT1a	clear	0.141781	0.097802	-1.16254	47	(0.01, 0.1, 1)	0	0	0.201688	lower
183	laminar similarity	Receptors	DAT	clear	0.133173	0.093229	-1.29206	9596	(0.7, 0.1, 0.1)	0	0	0.201688	lower
184	laminar similarity	Microstructure	thickness	clear	0.132808	0.100882	-1.22687	304	(0.5, 0.1, 1)	0	0	0.201688	lower
185	laminar similarity	metabolism	cmr02	spread	0.130408	0.0926465	-1.12882	44	(0.01, 0.1, 1)	0	0	0.201688	lower
186	laminar similarity	Receptors	GABAa	spread	0.129674	0.0922654	-1.16651	43	(0.01, 0.1, 1)	0	0	0.201688	lower
187	laminar similarity	Receptors	5HTT	spread	0.126383	0.102483	-1.23262	47	(0.01, 0.1, 1)	0	0	0.201688	lower
188	laminar similarity	Celltype	Endo	spread	0.124412	0.101776	-1.20777	43	(0.01, 0.1, 1)	0	0	0.201688	lower
189	laminar similarity	AD-realted	APOE	spread	0.118084	0.110234	-1.30742	84	(0.9, 0.1, 0.1)	0	0	0.201688	lower
190	laminar similarity	Receptors	NET	spread	0.117779	0.110664	-1.30953	50	(0.9, 0.1, 0.1)	0	0	0.201688	lower
191	laminar similarity	Receptors	VAChT	spread	0.117769	0.110665	-1.30987	50	(0.9, 0.1, 0.1)	0	0	0.201688	lower
192	laminar similarity	metabolism	cmrglc	spread	0.117735	0.110692	-1.30994	48	(0.9, 0.1, 0.1)	0	0	0.201688	lower
193	laminar similarity	Receptors	H3	spread	0.117718	0.110682	-1.30949	47	(0.9, 0.1, 0.1)	0	0	0.201688	lower
194	laminar similarity	metabolism	cbf	spread	0.117715	0.110683	-1.30957	47	(0.9, 0.1, 0.1)	0	0	0.201688	lower
195	laminar similarity	Celltype	Oligo	spread	0.117694	0.110739	-1.30966	47	(0.9, 0.1, 0.1)	0	0	0.201688	lower
196	laminar similarity	Receptors	5HT1b	spread	0.117666	0.110745	-1.31055	45	(0.9, 0.1, 0.1)	0	0	0.201688	lower
197	laminar similarity	Receptors	A4B2	spread	0.117557	0.11076	-1.31037	40	(0.9, 0.1, 0.1)	0	0	0.201688	lower
1	metabolic covariance	AD-realted	MAPT	spread	0.748215	0.0251957	0.492934	360	(0.01, 1.5, 1)	1	0	0.393835	higher
2	metabolic covariance	Cortical expansion	scaling	syn	0.697805	0.0393503	0.367224	125	(0.9, 2.5, 0.7)	1	0	0.393835	higher
3	metabolic covariance	AD-realted	MAPT	mis	0.696427	0.0382537	0.401862	493	(0.5, 2.5, 0.1)	0	0	0.393835	higher
4	metabolic covariance	AD-realted	Abeta	spread	0.695574	0.0424079	0.349816	632	(0.9, 0.9, 1)	1	0	0.393835	higher
5	metabolic covariance	Cortical expansion	scaling	mis	0.694388	0.0478209	0.298715	187	(0.9, 3, 1)	0	0	0.393835	higher
6	metabolic covariance	Cortical expansion	scalinghcp	mis	0.692217	0.0461958	0.323335	188	(0.9, 3, 1)	1	0	0.393835	higher
7	metabolic covariance	Cortical expansion	scalinghcp	syn	0.691452	0.0394786	0.334577	230	(0.9, 1.5, 0.5)	0	0	0.393835	higher
8	metabolic covariance	Receptors	5HT4	spread	0.691041	0.0441063	0.313501	701	(0.9, 0.9, 1)	1	0	0.393835	higher
9	metabolic covariance	Receptors	D2	mis	0.67408	0.0524091	0.368952	283	(0.9, 1.9, 0.3)	1	0	0.393835	higher
10	metabolic covariance	AD-realted	MAPT	syn	0.673643	0.0438607	0.364191	257	(0.3, 2.5, 0.1)	0	0	0.393835	higher
11	metabolic covariance	Cortical expansion	scaling	spread	0.672713	0.0397137	0.355912	164	(0.01, 1.5, 1)	0	0	0.393835	higher
12	metabolic covariance	Receptors	D2	syn	0.672459	0.0520867	0.35678	266	(0.7, 1.5, 0.1)	0	0	0.393835	higher
13	metabolic covariance	Receptors	5HT4	mis	0.66733	0.0276235	0.36303	268	(0.5, 3, 0.5)	0	0	0.393835	higher
14	metabolic covariance	Receptors	MOR	spread	0.663583	0.0498698	0.26356	132	(0.5, 3, 0.7)	1	0	0.393835	higher
15	metabolic covariance	Cortical expansion	scalingpnc	spread	0.662853	0.0454153	0.268603	122	(0.01, 1.9, 1)	1	0	0.393835	higher
16	metabolic covariance	Cortical expansion	scalinghcp	spread	0.660043	0.0390352	0.265511	183	(0.01, 1.5, 1)	0	0	0.393835	higher
17	metabolic covariance	Microstructure	thickness	mis	0.658705	0.0542861	0.292938	466	(0.5, 2.5, 0.1)	1	0	0.393835	higher
18	metabolic covariance	Receptors	CB1	spread	0.658615	0.0522472	0.286615	177	(0.7, 2, 1)	1	0	0.393835	higher
19	metabolic covariance	Microstructure	thickness	spread	0.656359	0.0494282	0.300025	207	(0.7, 1.9, 1)	0	0	0.393835	higher
20	metabolic covariance	Cortical expansion	scalingnih	mis	0.655993	0.0476324	0.234152	171	(0.7, 3, 1)	1	0	0.393835	higher
21	metabolic covariance	Cortical expansion	evoexp	spread	0.655287	0.0457779	0.308168	153	(0.7, 2.5, 1)	1	0	0.393835	higher
22	metabolic covariance	Cortical expansion	scalingnih	syn	0.649293	0.048609	0.243305	180	(0.7, 2, 0.3)	0	0	0.393835	higher
23	metabolic covariance	Receptors	5HT1a	spread	0.648018	0.0468977	0.255948	800	(0.9, 1, 1)	1	0	0.393835	higher
24	metabolic covariance	Cortical expansion	scalingnih	spread	0.64592	0.0486589	0.259299	651	(0.9, 0.9, 1)	0	0	0.393835	higher
25	metabolic covariance	Microstructure	thickness	syn	0.642585	0.0569046	0.176069	281	(0.1, 3, 0.1)	0	0	0.393835	higher
26	metabolic covariance	Receptors	D2	spread	0.641206	0.0536349	0.218291	633	(0.9, 1, 0.7)	0	0	0.393835	higher
27	metabolic covariance	Cortical expansion	devexp	spread	0.640299	0.0490728	0.102317	280	(0.7, 1, 1)	1	0	0.393835	higher
28	metabolic covariance	Receptors	5HT4	syn	0.639234	0.0570514	0.136543	88	(0.5, 3, 0.7)	0	0	0.393835	higher
29	metabolic covariance	AD-realted	Abeta	mis	0.63899	0.052658	-0.0531553	102	(0.01, 2.5, 1)	0	0	0.393835	higher
30	metabolic covariance	metabolism	cbf	clear	0.630775	0.0515506	0.151631	648	(0.01, 1, 0.1)	1	0	0.393835	higher
31	metabolic covariance	Celltype	OPC	spread	0.628028	0.0531211	0.238823	866	(0.9, 1, 0.1)	1	0	0.393835	higher
32	metabolic covariance	Receptors	5HT1a	syn	0.611687	0.0582404	0.20656	313	(0.01, 2.9, 0.1)	0	0	0.393835	higher
33	metabolic covariance	Celltype	Astro	spread	0.610647	0.0557366	0.187894	391	(0.7, 1.5, 0.1)	1	0	0.393835	higher
34	metabolic covariance	AD-realted	Abeta	syn	0.608285	0.0595061	-0.0450661	62	(0.1, 3, 1)	0	0	0.393835	higher
35	metabolic covariance	Cortical expansion	scalingpnc	syn	0.607645	0.0609219	-0.10763	62	(0.1, 3, 1)	0	0	0.393835	higher
36	metabolic covariance	Celltype	OPC	syn	0.60701	0.045978	0.224113	78	(0.1, 3, 1)	0	0	0.393835	higher
37	metabolic covariance	Cortical expansion	scalingpnc	mis	0.605689	0.0574549	-0.191582	88	(0.05, 2.5, 1)	0	0	0.393835	higher
38	metabolic covariance	Cortical expansion	evoexp	mis	0.601209	0.0588627	-0.0293418	89	(0.05, 2.5, 1)	0	0	0.393835	higher
39	metabolic covariance	Receptors	5HT1a	mis	0.597911	0.05566	0.115443	175	(0.1, 3, 0.7)	0	0	0.393835	higher
40	metabolic covariance	Cortical expansion	evoexp	syn	0.592471	0.0527857	0.0219547	58	(0.1, 3, 1)	0	0	0.393835	higher
41	metabolic covariance	Cortical expansion	devexp	syn	0.58981	0.0627137	0.013195	59	(0.3, 2.9, 1)	0	0	0.393835	higher
42	metabolic covariance	Cortical expansion	devexp	mis	0.58932	0.0628782	-0.0752033	85	(0.01, 2.5, 1)	0	0	0.393835	higher
43	metabolic covariance	Receptors	CB1	syn	0.586621	0.0509787	-0.000740806	59	(0.05, 3, 1)	0	0	0.393835	higher
44	metabolic covariance	Celltype	Astro	syn	0.585408	0.0484174	0.158537	80	(0.01, 3, 1)	0	0	0.393835	higher
45	metabolic covariance	Receptors	VAChT	clear	0.581121	0.0687848	-0.119957	75	(0.5, 1.5, 1)	1	0	0.393835	higher
46	metabolic covariance	Receptors	5HTT	clear	0.579152	0.0586904	-0.115626	79	(0.05, 1, 1)	1	0	0.393835	higher
47	metabolic covariance	Celltype	Endo	clear	0.575716	0.0615425	-0.242287	121	(0.3, 0.5, 1)	1	0	0.393835	higher
48	metabolic covariance	Celltype	Oligo	clear	0.57038	0.0440241	0.131057	64	(0.01, 3, 1)	1	0	0.393835	higher
49	metabolic covariance	Celltype	Micro	spread	0.568431	0.0587231	0.0294716	305	(0.7, 1.9, 0.1)	1	0	0.393835	higher
50	metabolic covariance	Receptors	CB1	mis	0.568316	0.05066	0.11612	76	(0.3, 3, 1)	0	0	0.393835	higher
51	metabolic covariance	Celltype	OPC	mis	0.567643	0.0507342	0.0829403	84	(0.01, 2.9, 1)	0	0	0.393835	higher
52	metabolic covariance	Receptors	DAT	spread	0.556217	0.0621406	-0.100665	237	(0.5, 2.9, 0.1)	1	0	0.393835	higher
53	metabolic covariance	Receptors	H3	clear	0.550144	0.0544927	0.0801157	166	(0.01, 1.5, 0.3)	1	0	0.393835	higher
54	metabolic covariance	Receptors	D1	spread	0.547814	0.0617516	-0.136007	225	(0.5, 3, 0.1)	1	0	0.393835	higher
55	metabolic covariance				0.5473	0.0595645	-0.0791872	300	(0.7, 1.9, 0.1)	0	1	0.393835	higher
56	metabolic covariance	AD-realted	Cluster1	spread	0.5473	0.0595645	-0.0791872	300	(0.7, 1.9, 0.1)	0	0	0.393835	higher
57	metabolic covariance	AD-realted	Cluster4	clear	0.5473	0.0595645	-0.0791872	300	(0.7, 1.9, 0.1)	0	0	0.393835	higher
58	metabolic covariance	AD-realted	Cluster7	mis	0.5473	0.0595645	-0.0791872	300	(0.7, 1.9, 0.1)	0	0	0.393835	higher
59	metabolic covariance	AD-realted	Cluster7	spread	0.5473	0.0595645	-0.0791872	300	(0.7, 1.9, 0.1)	0	0	0.393835	higher
60	metabolic covariance	AD-realted	Cluster7	syn	0.5473	0.0595645	-0.0791872	300	(0.7, 1.9, 0.1)	1	0	0.393835	higher
61	metabolic covariance	AD-realted	Cluster6	clear	0.5473	0.0595645	-0.0791872	300	(0.7, 1.9, 0.1)	0	0	0.393835	higher
62	metabolic covariance	AD-realted	Cluster6	mis	0.5473	0.0595645	-0.0791872	300	(0.7, 1.9, 0.1)	0	0	0.393835	higher
63	metabolic covariance	AD-realted	Cluster6	spread	0.5473	0.0595645	-0.0791872	300	(0.7, 1.9, 0.1)	0	0	0.393835	higher
64	metabolic covariance	AD-realted	Cluster6	syn	0.5473	0.0595645	-0.0791872	300	(0.7, 1.9, 0.1)	1	0	0.393835	higher
65	metabolic covariance	AD-realted	Cluster5	clear	0.5473	0.0595645	-0.0791872	300	(0.7, 1.9, 0.1)	0	0	0.393835	higher
66	metabolic covariance	AD-realted	Cluster5	mis	0.5473	0.0595645	-0.0791872	300	(0.7, 1.9, 0.1)	0	0	0.393835	higher
67	metabolic covariance	AD-realted	Cluster5	spread	0.5473	0.0595645	-0.0791872	300	(0.7, 1.9, 0.1)	0	0	0.393835	higher
68	metabolic covariance	AD-realted	Cluster5	syn	0.5473	0.0595645	-0.0791872	300	(0.7, 1.9, 0.1)	1	0	0.393835	higher
69	metabolic covariance	AD-realted	Cluster4	mis	0.5473	0.0595645	-0.0791872	300	(0.7, 1.9, 0.1)	0	0	0.393835	higher
70	metabolic covariance	AD-realted	Cluster1	mis	0.5473	0.0595645	-0.0791872	300	(0.7, 1.9, 0.1)	0	0	0.393835	higher
71	metabolic covariance	AD-realted	Cluster4	spread	0.5473	0.0595645	-0.0791872	300	(0.7, 1.9, 0.1)	0	0	0.393835	higher
72	metabolic covariance	AD-realted	Cluster4	syn	0.5473	0.0595645	-0.0791872	300	(0.7, 1.9, 0.1)	1	0	0.393835	higher
73	metabolic covariance	AD-realted	Cluster3	clear	0.5473	0.0595645	-0.0791872	300	(0.7, 1.9, 0.1)	0	0	0.393835	higher
74	metabolic covariance	AD-realted	Cluster3	mis	0.5473	0.0595645	-0.0791872	300	(0.7, 1.9, 0.1)	0	0	0.393835	higher
75	metabolic covariance	AD-realted	Cluster3	spread	0.5473	0.0595645	-0.0791872	300	(0.7, 1.9, 0.1)	0	0	0.393835	higher
76	metabolic covariance	AD-realted	Cluster3	syn	0.5473	0.0595645	-0.0791872	300	(0.7, 1.9, 0.1)	1	0	0.393835	higher
77	metabolic covariance	AD-realted	Cluster2	clear	0.5473	0.0595645	-0.0791872	300	(0.7, 1.9, 0.1)	0	0	0.393835	higher
78	metabolic covariance	AD-realted	Cluster2	mis	0.5473	0.0595645	-0.0791872	300	(0.7, 1.9, 0.1)	0	0	0.393835	higher
79	metabolic covariance	AD-realted	Cluster2	spread	0.5473	0.0595645	-0.0791872	300	(0.7, 1.9, 0.1)	0	0	0.393835	higher
80	metabolic covariance	AD-realted	Cluster2	syn	0.5473	0.0595645	-0.0791872	300	(0.7, 1.9, 0.1)	1	0	0.393835	higher
81	metabolic covariance	AD-realted	Cluster1	clear	0.5473	0.0595645	-0.0791872	300	(0.7, 1.9, 0.1)	0	0	0.393835	higher
82	metabolic covariance	AD-realted	Cluster1	syn	0.5473	0.0595645	-0.0791872	300	(0.7, 1.9, 0.1)	1	0	0.393835	higher
83	metabolic covariance	AD-realted	Cluster7	clear	0.5473	0.0595645	-0.0791872	300	(0.7, 1.9, 0.1)	0	0	0.393835	higher
84	metabolic covariance	Receptors	5HT2a	syn	0.542972	0.0604138	-0.21546	87	(0.01, 3, 0.5)	1	0	0.393835	higher
85	metabolic covariance	Receptors	5HT2a	spread	0.540396	0.0650849	-0.113424	304	(0.7, 1.9, 0.1)	0	0	0.393835	higher
86	metabolic covariance	Receptors	mGluR5	spread	0.539917	0.0585734	-0.0740916	322	(0.7, 2, 0.1)	1	0	0.393835	higher
87	metabolic covariance	Receptors	A4B2	spread	0.532553	0.0589188	-0.0448197	236	(0.5, 2.9, 0.1)	1	0	0.393835	higher
88	metabolic covariance	Celltype	Astro	mis	0.531822	0.0513382	0.0314341	92	(0.05, 2.5, 1)	0	0	0.393835	higher
89	metabolic covariance	Receptors	5HT1b	clear	0.528671	0.0376716	0.214052	255	(0.01, 3, 0.1)	1	0	0.393835	higher
90	metabolic covariance	Receptors	MOR	syn	0.525308	0.0457682	0.0262247	58	(0.01, 3, 1)	0	0	0.393835	higher
91	metabolic covariance	Celltype	Neuro-In	spread	0.525022	0.066938	-0.18193	321	(0.7, 1.9, 0.1)	1	0	0.393835	higher
92	metabolic covariance	Receptors	5HTT	syn	0.521678	0.0295946	0.0844541	3049	(0.01, 0.9, 0.1)	0	0	0.393835	higher
93	metabolic covariance	Receptors	5HT2a	mis	0.520909	0.0632233	-0.526157	87	(0.01, 3, 0.9)	0	0	0.393835	higher
94	metabolic covariance	Receptors	DAT	syn	0.52069	0.047388	-0.00492273	86	(0.01, 3, 0.9)	0	0	0.393835	higher
95	metabolic covariance	Receptors	H3	spread	0.520599	0.066797	-0.274734	230	(0.5, 3, 0.1)	0	0	0.393835	higher
96	metabolic covariance	Receptors	NMDA	spread	0.520342	0.0602624	-0.105421	230	(0.5, 2.9, 0.1)	1	0	0.393835	higher
97	metabolic covariance	Receptors	VAChT	spread	0.512375	0.0588851	-0.09251	245	(0.5, 3, 0.1)	0	0	0.393835	higher
98	metabolic covariance	Celltype	Micro	syn	0.508094	0.0435956	0.0203358	60	(0.01, 3, 1)	0	0	0.393835	higher
99	metabolic covariance	Celltype	Neuro-In	syn	0.502599	0.0536544	-0.102933	76	(0.01, 3, 1)	0	0	0.393835	higher
100	metabolic covariance	Receptors	5HT6	spread	0.500954	0.0670679	-0.159468	281	(0.5, 2.5, 0.1)	1	0	0.393835	higher
101	metabolic covariance	Celltype	Neuro-Ex	spread	0.499537	0.0706779	-0.338432	323	(0.7, 1.9, 0.1)	1	0	0.393835	higher
102	metabolic covariance	Receptors	D1	syn	0.494888	0.0464652	-0.0800878	59	(0.01, 3, 1)	0	0	0.393835	higher
103	metabolic covariance	metabolism	cmrglc	clear	0.491004	0.0369124	0.161762	981	(0.01, 0.5, 1)	1	0	0.393835	higher
104	metabolic covariance	metabolism	cmr02	clear	0.488553	0.0418245	0.184459	29999	(0.01, 0.5, 1)	1	0	0.393835	higher
105	metabolic covariance	metabolism	cbv	spread	0.486476	0.0650924	-0.219307	228	(0.5, 2.9, 0.1)	1	0	0.393835	higher
106	metabolic covariance	Receptors	A4B2	clear	0.485556	0.0603171	-0.371045	135	(0.01, 1, 1)	0	0	0.393835	higher
107	metabolic covariance	Celltype	Endo	syn	0.484731	0.0343366	0.0905685	260	(0.3, 1, 1)	0	0	0.393835	higher
108	metabolic covariance	Celltype	Neuro-Ex	syn	0.47718	0.0583308	-0.262096	69	(0.01, 3, 1)	0	0	0.393835	higher
109	metabolic covariance	Receptors	GABAa	clear	0.472985	0.0451333	0.0805322	389	(0.01, 1, 1)	1	0	0.393835	higher
110	metabolic covariance	Receptors	M1	spread	0.46738	0.0726535	-0.473053	216	(0.5, 3, 0.1)	1	0	0.393835	higher
111	metabolic covariance	Receptors	NMDA	syn	0.462197	0.0325758	0.00523287	389	(0.01, 0.9, 1)	0	0	0.393835	higher
112	metabolic covariance	Receptors	NET	clear	0.459937	0.0369327	0.0978383	29999	(0.01, 0.5, 1)	1	0	0.393835	higher
113	metabolic covariance	Receptors	5HTT	spread	0.457247	0.0633132	-0.278127	326	(0.5, 2.5, 0.1)	0	0	0.393835	higher
114	metabolic covariance	Microstructure	myelinmap	spread	0.447193	0.0687057	-0.348124	308	(0.5, 2.5, 0.1)	1	0	0.393835	higher
115	metabolic covariance	AD-realted	APOE	clear	0.441349	0.0456336	0.0830058	970	(0.01, 0.5, 1)	1	0	0.393835	higher
116	metabolic covariance	Receptors	mGluR5	syn	0.436022	0.043635	-0.0459342	59	(0.01, 2.9, 1)	0	0	0.393835	higher
117	metabolic covariance	Receptors	VAChT	syn	0.435811	0.0429454	0.0608408	102	(0.01, 1.9, 1)	0	0	0.393835	higher
118	metabolic covariance	Celltype	Oligo	syn	0.435685	0.0418134	-0.0296908	134	(0.01, 1.5, 1)	0	0	0.393835	higher
119	metabolic covariance	Receptors	NET	spread	0.433855	0.0693161	-0.3823	251	(0.5, 2.9, 0.1)	0	0	0.393835	higher
120	metabolic covariance	metabolism	cbv	syn	0.42743	0.0352949	-0.0791765	1965	(0.01, 0.9, 1)	0	0	0.393835	higher
121	metabolic covariance	Microstructure	myelinmap	syn	0.420846	0.0354355	-0.0571642	293	(0.01, 1, 1)	0	0	0.393835	higher
122	metabolic covariance	Celltype	Oligo	spread	0.416585	0.0862172	-0.982518	298	(0.5, 2.5, 0.1)	0	0	0.393835	higher
123	metabolic covariance	Celltype	Endo	spread	0.415554	0.0621708	-0.251317	347	(0.5, 2.5, 0.1)	0	0	0.393835	higher
124	metabolic covariance	Receptors	GABAa	spread	0.4105	0.0632146	-0.309181	320	(0.5, 2.5, 0.1)	0	0	0.393835	higher
125	metabolic covariance	Receptors	M1	syn	0.408679	0.0481098	-0.117289	115	(0.01, 1.5, 1)	0	0	0.393835	higher
126	metabolic covariance	Celltype	Micro	mis	0.408476	0.0483476	-0.480085	134	(0.01, 1.9, 1)	0	0	0.393835	higher
127	metabolic covariance	Microstructure	genepc1	spread	0.400949	0.0646274	-0.29417	336	(0.5, 2.5, 0.1)	1	0	0.393835	higher
128	metabolic covariance	Receptors	MOR	mis	0.400639	0.0596054	-0.380356	70	(0.01, 3, 1)	0	0	0.393835	higher
129	metabolic covariance	Microstructure	genepc1	syn	0.393446	0.0367361	-0.095011	359	(0.01, 1, 1)	0	0	0.393835	lower
130	metabolic covariance	AD-realted	APOE	spread	0.389647	0.0591047	-0.18812	276	(0.5, 2.9, 0.1)	0	0	0.393835	lower
131	metabolic covariance	metabolism	cmr02	spread	0.388775	0.0708731	-0.525682	316	(0.5, 2.5, 0.1)	0	0	0.393835	lower
132	metabolic covariance	Microstructure	genepc1	clear	0.378184	0.0573859	-0.200851	94	(0.01, 0.9, 1)	0	0	0.393835	lower
133	metabolic covariance	Receptors	5HT6	syn	0.377262	0.0470926	-0.0996607	117	(0.01, 1.5, 1)	0	0	0.393835	lower
134	metabolic covariance	Receptors	GABAa	syn	0.374484	0.0464512	-0.251075	257	(0.01, 1, 1)	0	0	0.393835	lower
135	metabolic covariance	Receptors	5HT6	clear	0.365762	0.038177	-0.122382	29999	(0.01, 0.9, 1)	0	0	0.393835	lower
136	metabolic covariance	metabolism	cmrglc	spread	0.359055	0.0660526	-0.418669	265	(0.5, 2.9, 0.1)	0	0	0.393835	lower
137	metabolic covariance	Receptors	D1	mis	0.358214	0.0430199	-0.180892	79	(0.01, 2.5, 1)	0	0	0.393835	lower
138	metabolic covariance	Celltype	Neuro-Ex	mis	0.357739	0.0453689	-0.122914	98	(0.1, 3, 1)	0	0	0.393835	lower
139	metabolic covariance	Receptors	M1	clear	0.357645	0.0397952	-0.303564	2393	(0.01, 0.5, 1)	0	0	0.393835	lower
140	metabolic covariance	AD-realted	APOE	syn	0.356309	0.0491332	-0.439839	233	(0.01, 1, 1)	0	0	0.393835	lower
141	metabolic covariance	Celltype	Neuro-Ex	clear	0.355015	0.0553904	-0.324879	65	(0.01, 1, 1)	0	0	0.393835	lower
142	metabolic covariance	Receptors	NMDA	clear	0.354299	0.0617334	-0.570515	70	(0.01, 1, 1)	0	0	0.393835	lower
143	metabolic covariance	Receptors	H3	syn	0.354299	0.0556531	-0.353	63	(0.01, 2.5, 1)	0	0	0.393835	lower
144	metabolic covariance	metabolism	cmr02	syn	0.35236	0.0552505	-0.552566	204	(0.01, 1, 1)	0	0	0.393835	lower
145	metabolic covariance	Celltype	Neuro-In	clear	0.34894	0.0567541	-0.518215	71	(0.01, 0.9, 1)	0	0	0.393835	lower
146	metabolic covariance	Celltype	Neuro-In	mis	0.345287	0.053145	-0.491537	84	(0.01, 2.9, 1)	0	0	0.393835	lower
147	metabolic covariance	Receptors	DAT	mis	0.343992	0.040965	-0.124707	459	(0.01, 1.5, 1)	0	0	0.393835	lower
148	metabolic covariance	Receptors	NET	syn	0.339556	0.0545005	-0.292078	87	(0.01, 1.9, 1)	0	0	0.393835	lower
149	metabolic covariance	Receptors	mGluR5	clear	0.329515	0.0516787	-0.0697423	1861	(0.01, 0.5, 1)	0	0	0.393835	lower
150	metabolic covariance	Microstructure	myelinmap	clear	0.32765	0.0646667	-0.583962	77	(0.01, 0.9, 1)	0	0	0.393835	lower
151	metabolic covariance	metabolism	cmrglc	syn	0.319208	0.0617793	-0.551058	95	(0.01, 1.5, 1)	0	0	0.393835	lower
152	metabolic covariance	metabolism	cbf	syn	0.313562	0.0625482	-0.573211	96	(0.01, 1.5, 1)	0	0	0.393835	lower
153	metabolic covariance	Receptors	mGluR5	mis	0.305793	0.0510962	-0.573261	105	(0.01, 2, 1)	0	0	0.393835	lower
154	metabolic covariance	Receptors	M1	mis	0.305663	0.0529928	-0.260196	80	(0.01, 1.9, 1)	0	0	0.393835	lower
155	metabolic covariance	Receptors	5HT1b	spread	0.302635	0.0621253	-0.436426	262	(0.5, 3, 0.1)	0	0	0.393835	lower
156	metabolic covariance	Receptors	5HT1b	syn	0.299696	0.0681383	-0.694481	93	(0.01, 1.5, 1)	0	0	0.393835	lower
157	metabolic covariance	Receptors	A4B2	syn	0.298006	0.0656595	-0.721337	47	(0.01, 3, 1)	0	0	0.393835	lower
158	metabolic covariance	Receptors	NMDA	mis	0.282192	0.0533878	-0.601843	83	(0.01, 2, 1)	0	0	0.393835	lower
159	metabolic covariance	Receptors	DAT	clear	0.280772	0.0746024	-0.825774	28	(0.01, 2.9, 1)	0	0	0.393835	lower
160	metabolic covariance	Receptors	5HT2a	clear	0.2793	0.0603329	-0.51294	243	(0.01, 0.5, 1)	0	0	0.393835	lower
161	metabolic covariance	metabolism	cbf	spread	0.276946	0.0601192	-0.378581	270	(0.5, 3, 0.1)	0	0	0.393835	lower
162	metabolic covariance	metabolism	cbv	mis	0.27112	0.054895	-0.544204	29999	(0.01, 1, 1)	0	0	0.393835	lower
163	metabolic covariance	Receptors	D1	clear	0.268144	0.0775233	-1.0968	81	(0.01, 0.9, 1)	0	0	0.393835	lower
164	metabolic covariance	Celltype	Endo	mis	0.265528	0.0593659	-0.655217	362	(0.1, 3, 0.1)	0	0	0.393835	lower
165	metabolic covariance	Cortical expansion	devexp	clear	0.255687	0.073793	-0.943911	8603	(0.01, 0.1, 0.1)	0	0	0.393835	lower
166	metabolic covariance	AD-realted	Abeta	clear	0.253992	0.0739846	-0.92888	8155	(0.01, 0.1, 0.1)	0	0	0.393835	lower
167	metabolic covariance	Receptors	5HT6	mis	0.25297	0.0653746	-0.805849	94	(0.01, 1.5, 1)	0	0	0.393835	lower
168	metabolic covariance	Cortical expansion	scalingpnc	clear	0.251178	0.07628	-1.01317	8119	(0.01, 0.1, 0.1)	0	0	0.393835	lower
169	metabolic covariance	Celltype	Micro	clear	0.246303	0.0722536	-0.856163	108	(0.01, 0.5, 1)	0	0	0.393835	lower
170	metabolic covariance	Cortical expansion	evoexp	clear	0.245029	0.0754091	-1.00834	9348	(0.01, 0.1, 0.1)	0	0	0.393835	lower
171	metabolic covariance	Cortical expansion	scaling	clear	0.239623	0.0806316	-1.10534	7729	(0.01, 0.1, 0.1)	0	0	0.393835	lower
172	metabolic covariance	Receptors	CB1	clear	0.237518	0.0771042	-1.01362	8994	(0.01, 0.1, 0.1)	0	0	0.393835	lower
173	metabolic covariance	Cortical expansion	scalingnih	clear	0.23751	0.0820382	-1.12377	7687	(0.01, 0.1, 0.1)	0	0	0.393835	lower
174	metabolic covariance	Microstructure	myelinmap	mis	0.23392	0.0772512	-0.978788	1001	(0.01, 1, 0.1)	0	0	0.393835	lower
175	metabolic covariance	Receptors	MOR	clear	0.230617	0.0798658	-1.09359	9000	(0.01, 0.1, 0.1)	0	0	0.393835	lower
176	metabolic covariance	Receptors	GABAa	mis	0.230008	0.0826286	-1.06833	1806	(0.01, 0.5, 0.1)	0	0	0.393835	lower
177	metabolic covariance	Receptors	VAChT	mis	0.229532	0.0844828	-1.11177	1581	(0.01, 0.5, 0.1)	0	0	0.393835	lower
178	metabolic covariance	Microstructure	genepc1	mis	0.229274	0.0785277	-1.02021	997	(0.01, 0.9, 0.1)	0	0	0.393835	lower
179	metabolic covariance	Receptors	NET	mis	0.229202	0.083944	-1.0845	1213	(0.01, 0.5, 0.1)	0	0	0.393835	lower
180	metabolic covariance	Receptors	H3	mis	0.22897	0.0849247	-1.08414	1140	(0.01, 0.5, 0.1)	0	0	0.393835	lower
181	metabolic covariance	Receptors	A4B2	mis	0.228771	0.0858203	-1.08488	952	(0.01, 0.5, 0.1)	0	0	0.393835	lower
182	metabolic covariance	AD-realted	APOE	mis	0.228388	0.0830101	-1.07682	1422	(0.01, 0.5, 0.1)	0	0	0.393835	lower
183	metabolic covariance	Receptors	5HTT	mis	0.228265	0.0774816	-1.01409	13393	(0.01, 1, 0.1)	0	0	0.393835	lower
184	metabolic covariance	Cortical expansion	scalinghcp	clear	0.228075	0.0843384	-1.15041	2076	(0.01, 0.1, 0.1)	0	0	0.393835	lower
185	metabolic covariance	metabolism	cmr02	mis	0.227762	0.0836014	-1.06959	1225	(0.01, 0.5, 0.1)	0	0	0.393835	lower
186	metabolic covariance	metabolism	cmrglc	mis	0.227645	0.085623	-1.09054	6238	(0.01, 0.1, 0.1)	0	0	0.393835	lower
187	metabolic covariance	metabolism	cbv	clear	0.227193	0.0873758	-1.06326	877	(0.01, 0.1, 0.1)	0	0	0.393835	lower
188	metabolic covariance	Receptors	5HT1b	mis	0.227131	0.0856673	-1.09265	3131	(0.01, 0.1, 0.1)	0	0	0.393835	lower
189	metabolic covariance	Celltype	Oligo	mis	0.226886	0.0845043	-1.08158	1559	(0.01, 0.5, 0.1)	0	0	0.393835	lower
190	metabolic covariance	metabolism	cbf	mis	0.226884	0.0856568	-1.09248	3011	(0.01, 0.1, 0.1)	0	0	0.393835	lower
191	metabolic covariance	Receptors	5HT4	clear	0.222302	0.0838166	-1.1035	1748	(0.01, 0.1, 0.1)	0	0	0.393835	lower
192	metabolic covariance	Celltype	OPC	clear	0.221046	0.0773061	-1.01627	547	(0.01, 0.5, 0.1)	0	0	0.393835	lower
193	metabolic covariance	Celltype	Astro	clear	0.22097	0.0796536	-1.07699	582	(0.01, 0.5, 0.1)	0	0	0.393835	lower
194	metabolic covariance	Receptors	D2	clear	0.21063	0.0887167	-1.17736	1135	(0.01, 0.1, 0.1)	0	0	0.393835	lower
195	metabolic covariance	Microstructure	thickness	clear	0.206266	0.0881053	-1.21472	7961	(0.01, 0.1, 0.1)	0	0	0.393835	lower
196	metabolic covariance	Receptors	5HT1a	clear	0.203453	0.0904186	-1.21638	1248	(0.01, 0.1, 0.1)	0	0	0.393835	lower
197	metabolic covariance	AD-realted	MAPT	clear	0.202485	0.0900542	-1.21068	851	(0.01, 0.1, 0.1)	0	0	0.393835	lower
1	electrophysiological	AD-realted	Abeta	spread	0.661497	0.0209662	0.394969	1242	(0.7, 0.1, 0.7)	1	0	0.369873	higher
2	electrophysiological	AD-realted	MAPT	mis	0.66002	0.0193294	0.363346	270	(0.9, 3, 0.1)	1	0	0.369873	higher
3	electrophysiological	Microstructure	thickness	mis	0.65829	0.0306161	0.298525	131	(0.3, 3, 1)	1	0	0.369873	higher
4	electrophysiological	Receptors	D2	mis	0.631846	0.0331646	0.204933	150	(0.05, 3, 1)	1	0	0.369873	higher
5	electrophysiological	AD-realted	MAPT	syn	0.627868	0.0213445	0.262381	122	(0.9, 3, 0.1)	0	0	0.369873	higher
6	electrophysiological	Celltype	Endo	clear	0.598043	0.036426	0.0374384	77	(0.7, 1.9, 1)	1	0	0.369873	higher
7	electrophysiological	Microstructure	thickness	spread	0.5971	0.0302655	0.322888	1888	(0.01, 0.9, 1)	0	0	0.369873	higher
8	electrophysiological	Receptors	CB1	spread	0.5969	0.0222199	0.253952	29999	(0.01, 0.5, 1)	1	0	0.369873	higher
9	electrophysiological	metabolism	cbf	clear	0.59664	0.0260088	0.256516	101	(0.7, 3, 0.1)	1	0	0.369873	higher
10	electrophysiological	Receptors	MOR	spread	0.595653	0.0375287	0.314971	29999	(0.5, 0.9, 1)	1	0	0.369873	higher
11	electrophysiological	Receptors	D2	syn	0.583776	0.0356483	0.19293	284	(0.9, 1, 0.7)	0	0	0.369873	higher
12	electrophysiological	Receptors	5HT4	spread	0.580125	0.0300172	0.270763	6326	(0.01, 0.9, 1)	1	0	0.369873	higher
13	electrophysiological	AD-realted	MAPT	spread	0.579758	0.0341345	0.274801	1526	(0.01, 0.9, 1)	0	0	0.369873	higher
14	electrophysiological	Receptors	CB1	mis	0.579246	0.0247482	0.186542	63	(0.01, 3, 1)	0	0	0.369873	higher
15	electrophysiological	Receptors	D2	spread	0.57642	0.0244054	0.239075	1186	(0.01, 0.9, 1)	0	0	0.369873	higher
16	electrophysiological	Cortical expansion	scalinghcp	syn	0.568775	0.0271062	0.255286	125	(0.9, 3, 0.1)	1	0	0.369873	higher
17	electrophysiological	Cortical expansion	scalingnih	syn	0.567964	0.0272986	0.229747	124	(0.9, 3, 0.1)	1	0	0.369873	higher
18	electrophysiological	Celltype	OPC	syn	0.565408	0.034264	0.121147	113	(0.7, 2.9, 0.3)	1	0	0.369873	higher
19	electrophysiological	Receptors	5HT1a	spread	0.561993	0.0263467	0.23	1458	(0.01, 0.9, 1)	1	0	0.369873	higher
20	electrophysiological	Receptors	5HT1b	clear	0.558344	0.0303089	0.202256	71	(0.9, 3, 0.1)	1	0	0.369873	higher
21	electrophysiological	metabolism	cmrglc	clear	0.555817	0.026727	0.18105	85	(0.7, 3, 0.3)	1	0	0.369873	higher
22	electrophysiological	metabolism	cmr02	clear	0.555295	0.0250277	0.122847	105	(0.5, 3, 0.3)	1	0	0.369873	higher
23	electrophysiological	Receptors	5HT4	syn	0.552834	0.0282163	0.221808	131	(0.9, 3, 0.1)	0	0	0.369873	higher
24	electrophysiological	Cortical expansion	scaling	syn	0.549836	0.0272808	0.188716	125	(0.9, 3, 0.1)	1	0	0.369873	higher
25	electrophysiological	Cortical expansion	scaling	spread	0.548346	0.0239196	0.14347	246	(0.01, 0.5, 1)	0	0	0.369873	higher
26	electrophysiological	Receptors	5HT4	mis	0.545379	0.0293844	0.193524	1147	(0.7, 2.5, 0.1)	0	0	0.369873	higher
27	electrophysiological	Receptors	MOR	mis	0.545317	0.0284219	0.187183	29999	(0.7, 1.9, 1)	0	0	0.369873	higher
28	electrophysiological	Receptors	5HT1a	mis	0.542126	0.0302313	0.113256	684	(0.1, 3, 0.1)	0	0	0.369873	higher
29	electrophysiological	Celltype	Astro	syn	0.538343	0.0331864	0.0640141	102	(0.7, 3, 0.5)	1	0	0.369873	higher
30	electrophysiological	Celltype	OPC	mis	0.534443	0.0433624	-0.0533234	237	(0.7, 3, 0.3)	0	0	0.369873	higher
31	electrophysiological	AD-realted	Abeta	mis	0.531122	0.0290961	0.141065	29999	(0.7, 2, 1)	0	0	0.369873	higher
32	electrophysiological	Cortical expansion	scalingnih	mis	0.530702	0.0286433	0.132653	268	(0.9, 3, 0.1)	0	0	0.369873	higher
33	electrophysiological	Cortical expansion	scalingpnc	spread	0.530261	0.0270001	0.157103	1123	(0.3, 0.1, 1)	1	0	0.369873	higher
34	electrophysiological	Celltype	Oligo	clear	0.530177	0.0337093	0.033373	51	(0.7, 3, 1)	1	0	0.369873	higher
35	electrophysiological	Microstructure	thickness	syn	0.527984	0.0288224	0.132464	168	(0.5, 3, 0.1)	0	0	0.369873	higher
36	electrophysiological	Microstructure	genepc1	clear	0.527923	0.0276605	0.0646995	110	(0.01, 3, 0.5)	1	0	0.369873	higher
37	electrophysiological	Cortical expansion	scalinghcp	mis	0.527154	0.0281385	0.162413	271	(0.9, 3, 0.1)	0	0	0.369873	higher
38	electrophysiological	Cortical expansion	scalingnih	spread	0.525222	0.0243797	0.0651536	316	(0.05, 0.5, 1)	0	0	0.369873	higher
39	electrophysiological	Receptors	CB1	syn	0.518386	0.0348979	0.199222	113	(0.9, 3, 0.3)	0	0	0.369873	higher
40	electrophysiological	Cortical expansion	devexp	spread	0.51585	0.0250835	0.053577	283	(0.01, 0.5, 1)	1	0	0.369873	higher
41	electrophysiological	AD-realted	APOE	clear	0.513938	0.0284324	0.0962812	296	(0.01, 3, 0.1)	1	0	0.369873	higher
42	electrophysiological	Cortical expansion	scaling	mis	0.504763	0.0292003	0.104681	275	(0.9, 3, 0.1)	0	0	0.369873	higher
43	electrophysiological	Microstructure	myelinmap	clear	0.50424	0.0281841	0.0971168	106	(0.3, 3, 0.7)	1	0	0.369873	higher
44	electrophysiological	Receptors	5HT2a	spread	0.498914	0.0289349	0.0721817	1436	(0.9, 0.1, 1)	1	0	0.369873	higher
45	electrophysiological	Cortical expansion	scalinghcp	spread	0.492095	0.025354	-0.0482717	376	(0.01, 0.5, 1)	0	0	0.369873	higher
46	electrophysiological	Receptors	5HT1a	syn	0.485958	0.0310712	0.076598	157	(0.7, 3, 0.1)	0	0	0.369873	higher
47	electrophysiological	Cortical expansion	evoexp	spread	0.484958	0.0273563	0.0152685	176	(0.9, 3, 0.1)	1	0	0.369873	higher
48	electrophysiological	Celltype	Astro	mis	0.483428	0.058664	-0.465982	61	(0.05, 2.5, 1)	0	0	0.369873	higher
49	electrophysiological	AD-realted	Abeta	syn	0.480245	0.0297238	0.0669978	113	(0.9, 3, 0.7)	0	0	0.369873	higher
50	electrophysiological	Celltype	OPC	spread	0.472647	0.0278918	-0.0140573	250	(0.01, 0.9, 1)	0	0	0.369873	higher
51	electrophysiological	Receptors	NET	clear	0.464155	0.0319895	0.0242344	49	(0.9, 3, 1)	1	0	0.369873	higher
52	electrophysiological	Receptors	GABAa	clear	0.452291	0.0298272	-0.104707	56	(0.7, 3, 1)	1	0	0.369873	higher
53	electrophysiological	Cortical expansion	evoexp	syn	0.449867	0.0434755	0.0786653	110	(0.9, 3, 0.1)	0	0	0.369873	higher
54	electrophysiological	Celltype	Astro	spread	0.448926	0.0291889	-0.0806359	142	(0.9, 3, 0.3)	0	0	0.369873	higher
55	electrophysiological	Celltype	Neuro-Ex	clear	0.430427	0.0472877	-0.615801	80	(0.3, 3, 1)	1	0	0.369873	higher
56	electrophysiological	Cortical expansion	devexp	syn	0.428882	0.0441295	0.0190698	122	(0.9, 3, 0.1)	0	0	0.369873	higher
57	electrophysiological	Cortical expansion	evoexp	mis	0.428266	0.0358088	-0.0578646	29999	(0.5, 1.9, 1)	0	0	0.369873	higher
58	electrophysiological	Receptors	D1	spread	0.427113	0.0307646	-0.0812382	144	(0.9, 3, 0.3)	1	0	0.369873	higher
59	electrophysiological	Receptors	mGluR5	spread	0.423896	0.0298089	-0.141304	170	(0.9, 3, 0.1)	1	0	0.369873	higher
60	electrophysiological	Receptors	MOR	syn	0.4233	0.0347181	-0.00880647	123	(0.9, 3, 0.5)	0	0	0.369873	higher
61	electrophysiological	Receptors	5HT2a	syn	0.419351	0.0607827	-0.239184	63	(0.9, 3, 0.1)	0	0	0.369873	higher
62	electrophysiological	Receptors	5HT6	spread	0.41899	0.0335862	-0.127058	208	(0.9, 0.9, 1)	1	0	0.369873	higher
63	electrophysiological	Celltype	Micro	spread	0.417153	0.0303123	-0.200837	163	(0.9, 3, 0.1)	1	0	0.369873	higher
64	electrophysiological	Cortical expansion	scalingpnc	syn	0.410007	0.0317594	-0.103134	113	(0.9, 3, 0.5)	0	0	0.369873	higher
65	electrophysiological	Cortical expansion	devexp	mis	0.40947	0.0654932	-0.347709	86	(0.9, 3, 0.1)	0	0	0.369873	higher
66	electrophysiological	AD-realted	Cluster5	syn	0.408741	0.0302054	-0.222498	154	(0.9, 3, 0.1)	1	0	0.369873	higher
67	electrophysiological	AD-realted	Cluster4	syn	0.408741	0.0302054	-0.222498	154	(0.9, 3, 0.1)	1	0	0.369873	higher
68	electrophysiological	AD-realted	Cluster4	spread	0.408741	0.0302054	-0.222498	154	(0.9, 3, 0.1)	0	0	0.369873	higher
69	electrophysiological	AD-realted	Cluster4	mis	0.408741	0.0302054	-0.222498	154	(0.9, 3, 0.1)	0	0	0.369873	higher
70	electrophysiological	AD-realted	Cluster4	clear	0.408741	0.0302054	-0.222498	154	(0.9, 3, 0.1)	0	0	0.369873	higher
71	electrophysiological	AD-realted	Cluster7	mis	0.408741	0.0302054	-0.222498	154	(0.9, 3, 0.1)	0	0	0.369873	higher
72	electrophysiological	AD-realted	Cluster3	clear	0.408741	0.0302054	-0.222498	154	(0.9, 3, 0.1)	0	0	0.369873	higher
73	electrophysiological	AD-realted	Cluster5	mis	0.408741	0.0302054	-0.222498	154	(0.9, 3, 0.1)	0	0	0.369873	higher
74	electrophysiological	AD-realted	Cluster5	clear	0.408741	0.0302054	-0.222498	154	(0.9, 3, 0.1)	0	0	0.369873	higher
75	electrophysiological	AD-realted	Cluster6	syn	0.408741	0.0302054	-0.222498	154	(0.9, 3, 0.1)	1	0	0.369873	higher
76	electrophysiological	AD-realted	Cluster6	spread	0.408741	0.0302054	-0.222498	154	(0.9, 3, 0.1)	0	0	0.369873	higher
77	electrophysiological	AD-realted	Cluster6	mis	0.408741	0.0302054	-0.222498	154	(0.9, 3, 0.1)	0	0	0.369873	higher
78	electrophysiological	AD-realted	Cluster5	spread	0.408741	0.0302054	-0.222498	154	(0.9, 3, 0.1)	0	0	0.369873	higher
79	electrophysiological	AD-realted	Cluster3	mis	0.408741	0.0302054	-0.222498	154	(0.9, 3, 0.1)	0	0	0.369873	higher
80	electrophysiological	AD-realted	Cluster3	spread	0.408741	0.0302054	-0.222498	154	(0.9, 3, 0.1)	0	0	0.369873	higher
81	electrophysiological	AD-realted	Cluster3	syn	0.408741	0.0302054	-0.222498	154	(0.9, 3, 0.1)	1	0	0.369873	higher
82	electrophysiological	AD-realted	Cluster2	clear	0.408741	0.0302054	-0.222498	154	(0.9, 3, 0.1)	0	0	0.369873	higher
83	electrophysiological	AD-realted	Cluster2	mis	0.408741	0.0302054	-0.222498	154	(0.9, 3, 0.1)	0	0	0.369873	higher
84	electrophysiological	AD-realted	Cluster2	spread	0.408741	0.0302054	-0.222498	154	(0.9, 3, 0.1)	0	0	0.369873	higher
85	electrophysiological	AD-realted	Cluster6	clear	0.408741	0.0302054	-0.222498	154	(0.9, 3, 0.1)	0	0	0.369873	higher
86	electrophysiological	AD-realted	Cluster2	syn	0.408741	0.0302054	-0.222498	154	(0.9, 3, 0.1)	1	0	0.369873	higher
87	electrophysiological	AD-realted	Cluster1	clear	0.408741	0.0302054	-0.222498	154	(0.9, 3, 0.1)	0	0	0.369873	higher
88	electrophysiological	AD-realted	Cluster1	mis	0.408741	0.0302054	-0.222498	154	(0.9, 3, 0.1)	0	0	0.369873	higher
89	electrophysiological	AD-realted	Cluster1	spread	0.408741	0.0302054	-0.222498	154	(0.9, 3, 0.1)	0	0	0.369873	higher
90	electrophysiological	AD-realted	Cluster1	syn	0.408741	0.0302054	-0.222498	154	(0.9, 3, 0.1)	1	0	0.369873	higher
91	electrophysiological	AD-realted	Cluster7	syn	0.408741	0.0302054	-0.222498	154	(0.9, 3, 0.1)	1	0	0.369873	higher
92	electrophysiological	AD-realted	Cluster7	spread	0.408741	0.0302054	-0.222498	154	(0.9, 3, 0.1)	0	0	0.369873	higher
93	electrophysiological				0.408741	0.0302054	-0.222498	154	(0.9, 3, 0.1)	0	1	0.369873	higher
94	electrophysiological	AD-realted	Cluster7	clear	0.408741	0.0302054	-0.222498	154	(0.9, 3, 0.1)	0	0	0.369873	higher
95	electrophysiological	Receptors	DAT	spread	0.406938	0.0313957	-0.153782	208	(0.9, 2.5, 0.1)	1	0	0.369873	higher
96	electrophysiological	Receptors	H3	spread	0.390748	0.0311503	-0.248044	178	(0.9, 2.9, 0.1)	1	0	0.369873	higher
97	electrophysiological	Receptors	NMDA	spread	0.389392	0.0318745	-0.187155	211	(0.9, 2.5, 0.1)	1	0	0.369873	higher
98	electrophysiological	Receptors	A4B2	spread	0.389306	0.0306124	-0.248749	179	(0.9, 2.9, 0.1)	1	0	0.369873	higher
99	electrophysiological	Celltype	Micro	syn	0.387907	0.0329949	-0.154341	117	(0.7, 3, 0.5)	0	0	0.369873	higher
100	electrophysiological	metabolism	cbv	spread	0.383701	0.0318235	-0.277191	167	(0.9, 2.9, 0.1)	1	0	0.369873	higher
101	electrophysiological	Receptors	5HTT	syn	0.379571	0.0366736	-0.566701	472	(0.01, 0.9, 0.1)	1	0	0.369873	higher
102	electrophysiological	Receptors	VAChT	clear	0.377026	0.0474025	-0.0823856	55	(0.9, 3, 0.1)	1	0	0.369873	higher
103	electrophysiological	Receptors	VAChT	spread	0.375485	0.0313354	-0.270917	180	(0.9, 2.9, 0.1)	0	0	0.369873	higher
104	electrophysiological	Celltype	Neuro-In	spread	0.372779	0.0322878	-0.283758	163	(0.9, 3, 0.1)	1	0	0.369873	higher
105	electrophysiological	Cortical expansion	scalingpnc	mis	0.371041	0.0290675	-0.457036	158	(0.01, 1, 1)	0	0	0.369873	higher
106	electrophysiological	Receptors	A4B2	clear	0.370982	0.0370032	-0.158239	41	(0.9, 3, 1)	0	0	0.369873	higher
107	electrophysiological	Receptors	M1	spread	0.367342	0.0335863	-0.281291	162	(0.9, 3, 0.1)	1	0	0.369873	lower
108	electrophysiological	Celltype	Micro	mis	0.366388	0.0321764	-0.457683	75	(0.01, 2, 1)	0	0	0.369873	lower
109	electrophysiological	Celltype	Oligo	syn	0.365071	0.0396302	-0.579809	561	(0.01, 0.9, 0.1)	0	0	0.369873	lower
110	electrophysiological	Celltype	Endo	syn	0.363671	0.037289	-0.675291	571	(0.01, 0.9, 0.1)	0	0	0.369873	lower
111	electrophysiological	Celltype	Neuro-Ex	spread	0.36244	0.0324699	-0.29587	164	(0.9, 3, 0.1)	0	0	0.369873	lower
112	electrophysiological	Receptors	D1	mis	0.36211	0.0390813	-0.327475	53	(0.01, 3, 1)	0	0	0.369873	lower
113	electrophysiological	Receptors	5HT2a	mis	0.361344	0.0550723	-0.114212	82	(0.9, 3, 0.1)	0	0	0.369873	lower
114	electrophysiological	Receptors	5HTT	spread	0.358204	0.0330171	-0.255395	214	(0.9, 2.5, 0.1)	0	0	0.369873	lower
115	electrophysiological	Receptors	GABAa	spread	0.354276	0.0327201	-0.277626	171	(0.9, 3, 0.1)	0	0	0.369873	lower
116	electrophysiological	Receptors	NET	spread	0.348962	0.0322874	-0.328266	171	(0.9, 3, 0.1)	0	0	0.369873	lower
117	electrophysiological	Microstructure	myelinmap	spread	0.347115	0.0327545	-0.313445	166	(0.9, 3, 0.1)	0	0	0.369873	lower
118	electrophysiological	Receptors	DAT	syn	0.346432	0.0433543	-0.113212	141	(0.7, 3, 0.3)	0	0	0.369873	lower
119	electrophysiological	Celltype	Neuro-In	clear	0.345572	0.0460426	-0.524302	74	(0.01, 0.9, 1)	0	0	0.369873	lower
120	electrophysiological	Receptors	5HTT	clear	0.344342	0.0335586	-0.285019	63	(0.7, 3, 1)	0	0	0.369873	lower
121	electrophysiological	metabolism	cmr02	spread	0.329561	0.0339686	-0.320601	171	(0.9, 3, 0.1)	0	0	0.369873	lower
122	electrophysiological	Microstructure	genepc1	spread	0.328857	0.0344623	-0.305122	172	(0.9, 3, 0.1)	0	0	0.369873	lower
123	electrophysiological	AD-realted	APOE	spread	0.32845	0.0338594	-0.32847	172	(0.9, 3, 0.1)	0	0	0.369873	lower
124	electrophysiological	Receptors	M1	clear	0.326826	0.0416724	-0.206432	58	(0.5, 3, 1)	0	0	0.369873	lower
125	electrophysiological	Receptors	mGluR5	mis	0.326709	0.033733	-0.66543	953	(0.01, 1.5, 0.1)	0	0	0.369873	lower
126	electrophysiological	metabolism	cbv	syn	0.323723	0.0421212	-0.660226	44	(0.01, 1.9, 1)	0	0	0.369873	lower
127	electrophysiological	metabolism	cmrglc	spread	0.322171	0.0344187	-0.3321	174	(0.9, 3, 0.1)	0	0	0.369873	lower
128	electrophysiological	Receptors	H3	clear	0.322153	0.041675	-0.156333	60	(0.9, 3, 0.5)	0	0	0.369873	lower
129	electrophysiological	metabolism	cbf	syn	0.320095	0.0347194	-0.722356	1455	(0.01, 0.5, 1)	0	0	0.369873	lower
130	electrophysiological	Celltype	Neuro-Ex	syn	0.316971	0.038134	-0.699827	72	(0.01, 0.9, 1)	0	0	0.369873	lower
131	electrophysiological	Celltype	Neuro-In	syn	0.312501	0.0389185	-0.72204	73	(0.01, 0.9, 1)	0	0	0.369873	lower
132	electrophysiological	Celltype	Endo	spread	0.312174	0.0349941	-0.351682	173	(0.9, 3, 0.1)	0	0	0.369873	lower
133	electrophysiological	Receptors	NMDA	syn	0.311991	0.0405596	-0.750976	75	(0.01, 1, 1)	0	0	0.369873	lower
134	electrophysiological	Receptors	5HT1b	spread	0.311252	0.0369105	-0.307107	185	(0.9, 3, 0.1)	0	0	0.369873	lower
135	electrophysiological	Receptors	VAChT	syn	0.309195	0.0399058	-0.747565	94	(0.01, 0.9, 1)	0	0	0.369873	lower
136	electrophysiological	Receptors	DAT	mis	0.30852	0.0452098	-0.563872	85	(0.01, 2, 1)	0	0	0.369873	lower
137	electrophysiological	metabolism	cmr02	syn	0.307085	0.0355846	-0.778536	487	(0.01, 0.5, 1)	0	0	0.369873	lower
138	electrophysiological	metabolism	cmrglc	syn	0.306824	0.0361635	-0.790145	578	(0.01, 0.5, 1)	0	0	0.369873	lower
139	electrophysiological	Microstructure	genepc1	syn	0.306392	0.0348006	-0.740901	504	(0.01, 0.5, 1)	0	0	0.369873	lower
140	electrophysiological	Microstructure	myelinmap	syn	0.306251	0.0371212	-0.845784	273	(0.01, 0.5, 1)	0	0	0.369873	lower
141	electrophysiological	Receptors	5HT1b	syn	0.3061	0.0389782	-0.852496	29999	(0.01, 0.5, 1)	0	0	0.369873	lower
142	electrophysiological	metabolism	cbv	clear	0.305231	0.0400996	-0.402786	113	(0.01, 3, 1)	0	0	0.369873	lower
143	electrophysiological	AD-realted	APOE	syn	0.302435	0.0367025	-0.794856	416	(0.01, 0.5, 1)	0	0	0.369873	lower
144	electrophysiological	Receptors	M1	syn	0.301015	0.0403972	-0.899826	93	(0.01, 0.9, 1)	0	0	0.369873	lower
145	electrophysiological	Receptors	mGluR5	syn	0.300669	0.0365933	-0.433562	368	(0.3, 2.9, 0.1)	0	0	0.369873	lower
146	electrophysiological	Receptors	NET	syn	0.3004	0.0396943	-0.870415	112	(0.01, 0.9, 1)	0	0	0.369873	lower
147	electrophysiological	metabolism	cbf	spread	0.300212	0.0365621	-0.349735	180	(0.9, 3, 0.1)	0	0	0.369873	lower
148	electrophysiological	Celltype	Oligo	spread	0.293388	0.0383543	-0.337208	189	(0.9, 3, 0.1)	0	0	0.369873	lower
149	electrophysiological	Receptors	5HT6	clear	0.292988	0.0548068	-0.992744	9920	(0.01, 0.1, 0.1)	0	0	0.369873	lower
150	electrophysiological	Receptors	A4B2	syn	0.292317	0.0422451	-0.944852	101	(0.01, 1, 1)	0	0	0.369873	lower
151	electrophysiological	Receptors	NMDA	clear	0.291125	0.0507859	-0.966426	352	(0.01, 0.5, 0.1)	0	0	0.369873	lower
152	electrophysiological	Receptors	5HT6	syn	0.290927	0.0427828	-0.942828	87	(0.01, 1, 1)	0	0	0.369873	lower
153	electrophysiological	Celltype	Neuro-In	mis	0.2887	0.0408932	-0.922254	1493	(0.01, 0.9, 0.1)	0	0	0.369873	lower
154	electrophysiological	Receptors	5HT2a	clear	0.288292	0.0511364	-0.846578	637	(0.01, 0.5, 0.1)	0	0	0.369873	lower
155	electrophysiological	Receptors	M1	mis	0.287059	0.0503183	-0.924114	62	(0.01, 1.5, 1)	0	0	0.369873	lower
156	electrophysiological	Receptors	H3	syn	0.287034	0.0445077	-0.9753	103	(0.01, 0.9, 1)	0	0	0.369873	lower
157	electrophysiological	Receptors	mGluR5	clear	0.285142	0.0551112	-0.964076	1326	(0.01, 0.1, 0.1)	0	0	0.369873	lower
158	electrophysiological	Receptors	D1	syn	0.283874	0.0442747	-0.930701	80	(0.01, 0.9, 1)	0	0	0.369873	lower
159	electrophysiological	Receptors	GABAa	syn	0.283136	0.0390978	-0.917205	464	(0.01, 0.5, 1)	0	0	0.369873	lower
160	electrophysiological	Celltype	Endo	mis	0.282218	0.0404985	-0.771056	438	(0.01, 1.9, 0.1)	0	0	0.369873	lower
161	electrophysiological	Celltype	Neuro-Ex	mis	0.281496	0.0442364	-0.977011	1170	(0.01, 0.9, 0.1)	0	0	0.369873	lower
162	electrophysiological	Receptors	A4B2	mis	0.279429	0.0465758	-1.0081	1608	(0.01, 1.5, 0.1)	0	0	0.369873	lower
163	electrophysiological	Receptors	H3	mis	0.279009	0.0473042	-0.983252	22178	(0.01, 1.5, 0.1)	0	0	0.369873	lower
164	electrophysiological	Cortical expansion	devexp	clear	0.277913	0.0545809	-0.991886	10981	(0.01, 0.1, 0.1)	0	0	0.369873	lower
165	electrophysiological	AD-realted	Abeta	clear	0.272725	0.0621981	-1.02075	653	(0.01, 0.1, 0.1)	0	0	0.369873	lower
166	electrophysiological	Receptors	D1	clear	0.27193	0.0605288	-1.07652	10488	(0.01, 0.1, 0.1)	0	0	0.369873	lower
167	electrophysiological	Receptors	5HT6	mis	0.271363	0.0617915	-1.05558	427	(0.01, 1.5, 0.1)	0	0	0.369873	lower
168	electrophysiological	Cortical expansion	scalingpnc	clear	0.270137	0.063326	-1.09033	1502	(0.01, 0.1, 0.1)	0	0	0.369873	lower
169	electrophysiological	Celltype	Micro	clear	0.268361	0.0568429	-1.02937	646	(0.01, 0.5, 0.1)	0	0	0.369873	lower
170	electrophysiological	Receptors	NMDA	mis	0.266422	0.0588236	-1.10175	1190	(0.01, 0.9, 0.1)	0	0	0.369873	lower
171	electrophysiological	Receptors	VAChT	mis	0.264995	0.0526439	-1.12523	1261	(0.01, 1.5, 0.1)	0	0	0.369873	lower
172	electrophysiological	Celltype	Astro	clear	0.262231	0.0526579	-1.10914	459	(0.01, 0.5, 0.1)	0	0	0.369873	lower
173	electrophysiological	Cortical expansion	scaling	clear	0.260415	0.0671724	-1.16513	7679	(0.01, 0.1, 0.1)	0	0	0.369873	lower
174	electrophysiological	Receptors	DAT	clear	0.259651	0.0539176	-1.108	66	(0.01, 0.5, 1)	0	0	0.369873	lower
175	electrophysiological	metabolism	cbv	mis	0.257435	0.0634423	-1.13777	10946	(0.01, 0.5, 0.1)	0	0	0.369873	lower
176	electrophysiological	Cortical expansion	scalingnih	clear	0.256335	0.0685196	-1.19045	7681	(0.01, 0.1, 0.1)	0	0	0.369873	lower
177	electrophysiological	Celltype	OPC	clear	0.255182	0.065437	-1.15793	10936	(0.01, 0.1, 0.1)	0	0	0.369873	lower
178	electrophysiological	Receptors	NET	mis	0.254259	0.0633034	-1.16667	846	(0.01, 0.9, 0.1)	0	0	0.369873	lower
179	electrophysiological	Receptors	GABAa	mis	0.253672	0.0648552	-1.16418	9642	(0.01, 0.5, 0.1)	0	0	0.369873	lower
180	electrophysiological	Cortical expansion	evoexp	clear	0.253547	0.0663588	-1.10134	712	(0.01, 0.1, 0.1)	0	0	0.369873	lower
181	electrophysiological	Receptors	CB1	clear	0.253253	0.0656611	-1.07878	699	(0.01, 0.1, 0.1)	0	0	0.369873	lower
182	electrophysiological	Cortical expansion	scalinghcp	clear	0.253211	0.0711189	-1.2009	6803	(0.01, 0.1, 0.1)	0	0	0.369873	lower
183	electrophysiological	Microstructure	myelinmap	mis	0.252893	0.0642157	-1.15662	1323	(0.01, 0.5, 0.1)	0	0	0.369873	lower
184	electrophysiological	Celltype	Oligo	mis	0.252395	0.0660205	-1.17271	9398	(0.01, 0.5, 0.1)	0	0	0.369873	lower
185	electrophysiological	metabolism	cmrglc	mis	0.251572	0.0634498	-1.18366	2195	(0.01, 0.5, 0.1)	0	0	0.369873	lower
186	electrophysiological	metabolism	cmr02	mis	0.251249	0.0650759	-1.17965	1149	(0.01, 0.5, 0.1)	0	0	0.369873	lower
187	electrophysiological	AD-realted	APOE	mis	0.251099	0.0646691	-1.18545	1201	(0.01, 0.5, 0.1)	0	0	0.369873	lower
188	electrophysiological	Microstructure	genepc1	mis	0.250579	0.0656604	-1.17848	950	(0.01, 0.5, 0.1)	0	0	0.369873	lower
189	electrophysiological	Receptors	5HTT	mis	0.249669	0.0643113	-1.1089	1121	(0.01, 0.9, 0.1)	0	0	0.369873	lower
190	electrophysiological	Receptors	5HT1b	mis	0.249325	0.0660893	-1.18503	2600	(0.01, 0.5, 0.1)	0	0	0.369873	lower
191	electrophysiological	metabolism	cbf	mis	0.247885	0.0664303	-1.18997	1250	(0.01, 0.5, 0.1)	0	0	0.369873	lower
192	electrophysiological	Receptors	MOR	clear	0.244709	0.0679697	-1.14265	697	(0.01, 0.1, 0.1)	0	0	0.369873	lower
193	electrophysiological	Receptors	5HT4	clear	0.238616	0.0717837	-1.16085	936	(0.01, 0.1, 0.1)	0	0	0.369873	lower
194	electrophysiological	Receptors	D2	clear	0.231911	0.0713152	-1.22877	11157	(0.01, 0.1, 0.1)	0	0	0.369873	lower
195	electrophysiological	Receptors	5HT1a	clear	0.225274	0.0724109	-1.26018	10610	(0.01, 0.1, 0.1)	0	0	0.369873	lower
196	electrophysiological	AD-realted	MAPT	clear	0.224374	0.0779068	-1.26631	7698	(0.01, 0.1, 0.1)	0	0	0.369873	lower
197	electrophysiological	Microstructure	thickness	clear	0.223346	0.0757759	-1.24401	964	(0.01, 0.1, 0.1)	0	0	0.369873	lower
1	temporal similarity	AD-realted	MAPT	spread	0.643258	0.0482423	0.343696	1546	(0.9, 3, 0.9)	1	0	0.295917	higher
2	temporal similarity	AD-realted	MAPT	mis	0.637255	0.029507	0.400394	29999	(0.9, 1.9, 1)	0	0	0.295917	higher
3	temporal similarity	Receptors	5HT4	mis	0.629604	0.071768	0.0409359	512	(0.9, 1.5, 1)	1	0	0.295917	higher
4	temporal similarity	Receptors	5HT4	syn	0.608005	0.0468341	0.242013	714	(0.9, 0.9, 0.1)	0	0	0.295917	higher
5	temporal similarity	Receptors	5HT1a	spread	0.587878	0.0278644	0.170643	9163	(0.9, 3, 0.1)	1	0	0.295917	higher
6	temporal similarity	Receptors	D2	spread	0.567087	0.02361	0.170186	29999	(0.01, 0.9, 1)	1	0	0.295917	higher
7	temporal similarity	Receptors	5HT4	spread	0.564575	0.0434866	0.231615	2196	(0.9, 3, 1)	0	0	0.295917	higher
8	temporal similarity	Cortical expansion	scaling	syn	0.543118	0.0765229	-0.218664	309	(0.9, 0.9, 1)	1	0	0.295917	higher
9	temporal similarity	Cortical expansion	scaling	mis	0.530238	0.0780795	-0.255989	344	(0.9, 1.5, 1)	0	0	0.295917	higher
10	temporal similarity	Cortical expansion	scalinghcp	syn	0.525388	0.0368941	0.123334	168	(0.9, 2.5, 1)	1	0	0.295917	higher
11	temporal similarity	AD-realted	MAPT	syn	0.511493	0.0346377	0.16378	29999	(0.9, 1.5, 0.1)	0	0	0.295917	higher
12	temporal similarity	Cortical expansion	scalinghcp	mis	0.492308	0.0575576	-0.0230869	226	(0.9, 3, 1)	0	0	0.295917	higher
13	temporal similarity	Microstructure	thickness	spread	0.475188	0.0348257	0.104622	29999	(0.01, 0.9, 1)	1	0	0.295917	higher
14	temporal similarity	Receptors	VAChT	clear	0.457698	0.0784392	-0.108547	102	(0.05, 3, 0.3)	1	0	0.295917	higher
15	temporal similarity	AD-realted	Abeta	syn	0.448862	0.0541006	0.0545202	29999	(0.9, 3, 0.1)	1	0	0.295917	higher
16	temporal similarity	Receptors	D2	mis	0.44057	0.0498428	0.0146485	1188	(0.9, 1.5, 0.1)	0	0	0.295917	higher
17	temporal similarity	AD-realted	Abeta	mis	0.439105	0.0554817	0.138655	29999	(0.9, 3, 1)	0	0	0.295917	higher
18	temporal similarity	Celltype	Oligo	clear	0.429607	0.0554121	-0.315408	3729	(0.01, 0.5, 0.1)	1	0	0.295917	higher
19	temporal similarity	Receptors	MOR	spread	0.427507	0.0800603	-0.0860339	29999	(0.3, 3, 1)	1	0	0.295917	higher
20	temporal similarity	Cortical expansion	scalingnih	syn	0.419552	0.0741908	-0.0618927	574	(0.9, 0.9, 0.1)	1	0	0.295917	higher
21	temporal similarity	AD-realted	Abeta	spread	0.416183	0.046904	0.020744	9767	(0.01, 1.5, 0.1)	0	0	0.295917	higher
22	temporal similarity	Cortical expansion	scalinghcp	spread	0.399918	0.0366753	-0.0640351	823	(0.7, 3, 0.1)	0	0	0.295917	higher
23	temporal similarity	Microstructure	thickness	mis	0.390879	0.0435223	0.015712	29999	(0.9, 1.5, 1)	0	0	0.295917	higher
24	temporal similarity	Cortical expansion	scalingnih	mis	0.389539	0.0631409	0.0399669	601	(0.9, 1.9, 0.1)	0	0	0.295917	higher
25	temporal similarity	metabolism	cbf	clear	0.386783	0.0490735	0.00426804	29999	(0.9, 3, 0.1)	1	0	0.295917	higher
26	temporal similarity	Receptors	GABAa	clear	0.365778	0.0614563	-0.0752509	29999	(0.9, 3, 1)	1	0	0.295917	higher
27	temporal similarity	Receptors	5HT1b	clear	0.363355	0.0497464	-0.0759493	29999	(0.9, 3, 0.1)	1	0	0.295917	higher
28	temporal similarity	Receptors	D2	syn	0.361446	0.0555964	-0.00278522	29999	(0.9, 3, 1)	0	0	0.295917	higher
29	temporal similarity	Receptors	NET	clear	0.35391	0.0474144	-0.0729041	29999	(0.9, 3, 1)	1	0	0.295917	higher
30	temporal similarity	Receptors	A4B2	syn	0.347707	0.0290816	-0.493617	747	(0.3, 3, 0.3)	1	0	0.295917	higher
31	temporal similarity	Cortical expansion	devexp	mis	0.342041	0.0870908	-1.07099	2907	(0.9, 1, 0.1)	1	0	0.295917	higher
32	temporal similarity	Receptors	5HT2a	syn	0.341294	0.078917	-1.02698	620	(0.7, 1, 0.1)	1	0	0.295917	higher
33	temporal similarity	Cortical expansion	evoexp	mis	0.338344	0.0463818	-0.131703	974	(0.3, 1.9, 0.1)	1	0	0.295917	higher
34	temporal similarity	Receptors	CB1	spread	0.335928	0.0885263	-0.195076	29999	(0.01, 3, 1)	1	0	0.295917	higher
35	temporal similarity	Cortical expansion	scaling	spread	0.335594	0.0460918	-0.334797	887	(0.7, 3, 0.1)	0	0	0.295917	higher
36	temporal similarity	Receptors	5HT1a	mis	0.330157	0.0545447	-0.0177553	29999	(0.9, 3, 1)	0	0	0.295917	higher
37	temporal similarity	Cortical expansion	evoexp	spread	0.319263	0.087908	-0.132552	29999	(0.3, 3, 1)	0	0	0.295917	higher
38	temporal similarity	Receptors	5HTT	clear	0.318289	0.0977152	-1.43717	95	(0.3, 3, 0.1)	1	0	0.295917	higher
39	temporal similarity	Receptors	5HT2a	mis	0.314869	0.0877912	-1.6913	6658	(0.9, 1, 0.7)	0	0	0.295917	higher
40	temporal similarity	Celltype	Endo	clear	0.31419	0.0776783	-0.278494	48	(0.9, 3, 0.1)	1	0	0.295917	higher
41	temporal similarity	Microstructure	myelinmap	clear	0.311127	0.0616548	-0.0777721	29999	(0.9, 3, 1)	1	0	0.295917	higher
42	temporal similarity	AD-realted	APOE	clear	0.30812	0.0587083	-0.0641634	29999	(0.9, 3, 1)	1	0	0.295917	higher
43	temporal similarity	Receptors	H3	clear	0.304973	0.0462946	-0.266851	145	(0.9, 3, 0.1)	1	0	0.295917	higher
44	temporal similarity	Cortical expansion	devexp	syn	0.299811	0.0863113	-1.15636	812	(0.7, 1, 0.1)	0	0	0.295917	higher
45	temporal similarity	Receptors	CB1	mis	0.297862	0.0652501	-0.0725736	29999	(0.9, 3, 1)	0	0	0.295917	higher
46	temporal similarity	Cortical expansion	evoexp	syn	0.297365	0.0518248	-0.178947	958	(0.5, 1, 0.1)	0	0	0.295917	higher
47	temporal similarity	Receptors	5HT1a	syn	0.295539	0.0587315	-0.0954193	29999	(0.9, 3, 0.1)	0	0	0.295917	lower
48	temporal similarity	Celltype	Astro	spread	0.293734	0.0459932	-0.182249	1407	(0.01, 2.5, 0.1)	1	0	0.295917	lower
49	temporal similarity	Microstructure	thickness	syn	0.286736	0.0446425	-0.208594	29999	(0.9, 0.9, 1)	0	0	0.295917	lower
50	temporal similarity	Celltype	Astro	mis	0.281995	0.0485727	-0.186586	29999	(0.01, 3, 1)	0	0	0.295917	lower
51	temporal similarity	Cortical expansion	devexp	spread	0.276791	0.0786451	-0.241297	29999	(0.5, 3, 1)	0	0	0.295917	lower
52	temporal similarity	Microstructure	genepc1	clear	0.276685	0.0721794	-0.0834865	29999	(0.9, 3, 1)	1	0	0.295917	lower
53	temporal similarity	metabolism	cmr02	clear	0.275569	0.0616417	-0.119435	29999	(0.9, 3, 0.1)	1	0	0.295917	lower
54	temporal similarity	metabolism	cbf	syn	0.274452	0.0487536	-0.229061	29999	(0.01, 3, 1)	0	0	0.295917	lower
55	temporal similarity	Celltype	OPC	spread	0.274375	0.0543921	-0.226592	3070	(0.01, 3, 0.1)	1	0	0.295917	lower
56	temporal similarity	Celltype	Astro	syn	0.270772	0.0494578	-0.186256	29999	(0.9, 3, 1)	0	0	0.295917	lower
57	temporal similarity	Cortical expansion	scalingpnc	spread	0.269965	0.0917271	-0.306792	29999	(0.1, 3, 1)	1	0	0.295917	lower
58	temporal similarity	metabolism	cmrglc	clear	0.269828	0.0639243	-0.0790908	29999	(0.9, 3, 0.1)	1	0	0.295917	lower
59	temporal similarity	Receptors	5HT1b	syn	0.255664	0.0507298	-0.216559	29999	(0.01, 3, 1)	0	0	0.295917	lower
60	temporal similarity	Receptors	A4B2	clear	0.253399	0.0490942	-0.272478	29999	(0.9, 0.5, 0.1)	0	0	0.295917	lower
61	temporal similarity	Receptors	MOR	mis	0.250058	0.064222	-0.147438	29999	(0.9, 3, 1)	0	0	0.295917	lower
62	temporal similarity	Cortical expansion	scalingpnc	syn	0.244134	0.0542996	-0.321717	226	(0.9, 2.5, 0.1)	0	0	0.295917	lower
63	temporal similarity	Cortical expansion	scalingnih	spread	0.238067	0.0484355	-0.268355	7381	(0.01, 0.9, 0.1)	0	0	0.295917	lower
64	temporal similarity	Celltype	Oligo	syn	0.224407	0.0407076	-0.511657	29999	(0.01, 3, 1)	0	0	0.295917	lower
65	temporal similarity	Celltype	OPC	mis	0.223591	0.0614156	-0.174315	29999	(0.9, 3, 0.1)	0	0	0.295917	lower
66	temporal similarity	Cortical expansion	scalingpnc	mis	0.223532	0.0612554	-0.189815	385	(0.9, 3, 0.1)	0	0	0.295917	lower
67	temporal similarity	Receptors	CB1	syn	0.220013	0.0644311	-0.312642	7430	(0.9, 3, 0.1)	0	0	0.295917	lower
68	temporal similarity	Receptors	NET	syn	0.206385	0.0545929	-0.446939	29999	(0.01, 3, 1)	0	0	0.295917	lower
69	temporal similarity	Celltype	OPC	syn	0.202489	0.0568006	-0.280469	427	(0.9, 1.5, 0.1)	0	0	0.295917	lower
70	temporal similarity	Receptors	D2	clear	0.190913	0.108373	-1.79968	28	(0.9, 3, 0.1)	0	0	0.295917	lower
71	temporal similarity	Celltype	Endo	syn	0.189848	0.0491438	-0.521202	29999	(0.01, 3, 1)	0	0	0.295917	lower
72	temporal similarity	Receptors	CB1	clear	0.184334	0.106901	-1.74279	76	(0.7, 2, 0.1)	0	0	0.295917	lower
73	temporal similarity	Celltype	Neuro-Ex	clear	0.176552	0.0508766	-0.394281	29999	(0.9, 1, 1)	1	0	0.295917	lower
74	temporal similarity	metabolism	cmrglc	syn	0.162784	0.0703441	-0.325059	29999	(0.01, 3, 1)	0	0	0.295917	lower
75	temporal similarity	Celltype	Micro	syn	0.161565	0.0554375	-0.362584	894	(0.9, 3, 0.1)	1	0	0.295917	lower
76	temporal similarity	Receptors	D1	spread	0.155231	0.0887498	-0.568601	29999	(0.3, 3, 1)	1	0	0.295917	lower
77	temporal similarity	Celltype	Micro	mis	0.152378	0.0589914	-0.512634	4527	(0.3, 1.5, 0.1)	0	0	0.295917	lower
78	temporal similarity	Celltype	Neuro-In	spread	0.139941	0.0822229	-0.534813	29999	(0.9, 1.5, 0.3)	1	0	0.295917	lower
79	temporal similarity	Celltype	Neuro-In	clear	0.139618	0.0615142	-0.357412	29999	(0.9, 1.9, 1)	0	0	0.295917	lower
80	temporal similarity	Celltype	Neuro-Ex	spread	0.137808	0.0822145	-0.570124	19671	(0.9, 1.5, 0.3)	0	0	0.295917	lower
81	temporal similarity	Celltype	Micro	spread	0.137108	0.0831439	-0.507209	29999	(0.01, 3, 1)	0	0	0.295917	lower
82	temporal similarity	Receptors	H3	syn	0.131766	0.0509256	-0.51455	29999	(0.01, 3, 1)	0	0	0.295917	lower
83	temporal similarity	Celltype	Neuro-Ex	mis	0.129944	0.0951242	-1.72657	3884	(0.9, 1, 0.1)	0	0	0.295917	lower
84	temporal similarity	Receptors	M1	syn	0.123372	0.0999431	-1.81545	533	(0.9, 0.9, 0.1)	1	0	0.295917	lower
85	temporal similarity	metabolism	cbv	mis	0.122607	0.108569	-2.47795	344	(0.9, 1.9, 0.1)	1	0	0.295917	lower
86	temporal similarity	Receptors	5HT2a	spread	0.118946	0.0562905	-0.456841	1244	(0.05, 2, 0.1)	0	0	0.295917	lower
87	temporal similarity	Receptors	VAChT	syn	0.118578	0.0598439	-0.404346	29999	(0.01, 3, 1)	0	0	0.295917	lower
88	temporal similarity	Receptors	DAT	spread	0.118499	0.0634901	-0.568051	29999	(0.7, 3, 1)	1	0	0.295917	lower
89	temporal similarity	metabolism	cmr02	syn	0.112392	0.0732206	-0.389835	29999	(0.01, 3, 1)	0	0	0.295917	lower
90	temporal similarity	AD-realted	APOE	syn	0.106273	0.0706279	-0.413068	29999	(0.01, 3, 1)	0	0	0.295917	lower
91	temporal similarity	metabolism	cbv	syn	0.10036	0.0997219	-1.37747	134	(0.9, 2, 0.1)	0	0	0.295917	lower
92	temporal similarity	metabolism	cbv	spread	0.079849	0.0704855	-0.584417	29999	(0.01, 3, 1)	0	0	0.295917	lower
93	temporal similarity	Receptors	mGluR5	mis	0.0798432	0.0723063	-0.378612	29999	(0.9, 3, 0.1)	1	0	0.295917	lower
94	temporal similarity	Receptors	GABAa	syn	0.07954	0.0471398	-0.828551	29999	(0.01, 3, 1)	0	0	0.295917	lower
95	temporal similarity	Receptors	M1	clear	0.0795399	0.10131	-0.81582	35	(0.9, 3, 0.1)	0	0	0.295917	lower
96	temporal similarity	Receptors	NMDA	clear	0.0753746	0.122107	-1.93861	0	(0.9, 0.1, 0.1)	1	0	0.295917	lower
97	temporal similarity	Receptors	5HT4	clear	0.075352	0.122116	-1.93269	0	(0.9, 0.1, 0.1)	0	0	0.295917	lower
98	temporal similarity	Receptors	D1	clear	0.0751605	0.1222	-1.88537	0	(0.9, 0.1, 0.1)	0	0	0.295917	lower
99	temporal similarity	Receptors	mGluR5	clear	0.074942	0.1223	-1.83639	0	(0.9, 0.1, 0.1)	0	0	0.295917	lower
100	temporal similarity	Cortical expansion	devexp	clear	0.0744699	0.122525	-1.74306	0	(0.9, 0.1, 0.1)	0	0	0.295917	lower
101	temporal similarity	Receptors	MOR	clear	0.0743249	0.122598	-1.71695	0	(0.9, 0.1, 0.1)	0	0	0.295917	lower
102	temporal similarity	Microstructure	genepc1	syn	0.073943	0.122797	-1.65248	0	(0.9, 0.1, 0.1)	0	0	0.295917	lower
103	temporal similarity	Microstructure	myelinmap	syn	0.073717	0.122919	-1.61679	0	(0.9, 0.1, 0.1)	0	0	0.295917	lower
104	temporal similarity	Receptors	DAT	clear	0.073575	0.122998	-1.59517	0	(0.9, 0.1, 0.1)	0	0	0.295917	lower
105	temporal similarity	metabolism	cbv	clear	0.0733561	0.123122	-1.56293	0	(0.9, 0.1, 0.1)	0	0	0.295917	lower
106	temporal similarity	Cortical expansion	evoexp	clear	0.0732859	0.123163	-1.55285	0	(0.9, 0.1, 0.1)	0	0	0.295917	lower
107	temporal similarity	Receptors	5HT6	clear	0.0730472	0.123304	-1.51943	0	(0.9, 0.1, 0.1)	1	0	0.295917	lower
108	temporal similarity	AD-realted	Abeta	clear	0.0729016	0.123392	-1.49966	0	(0.9, 0.1, 0.1)	0	0	0.295917	lower
109	temporal similarity	Receptors	VAChT	mis	0.0726872	0.123525	-1.47131	0	(0.9, 3, 1)	0	0	0.295917	lower
110	temporal similarity	Receptors	NMDA	mis	0.0726606	0.123542	-1.46785	0	(0.9, 3, 1)	0	0	0.295917	lower
111	temporal similarity	Celltype	OPC	clear	0.072602	0.123579	-1.46029	0	(0.9, 0.1, 0.1)	0	0	0.295917	lower
112	temporal similarity	Receptors	D1	mis	0.07259	0.123587	-1.45874	0	(0.9, 3, 1)	0	0	0.295917	lower
113	temporal similarity	Receptors	DAT	mis	0.072576	0.123596	-1.45695	0	(0.9, 3, 1)	0	0	0.295917	lower
114	temporal similarity	Microstructure	thickness	clear	0.072575	0.123596	-1.45683	0	(0.9, 0.1, 0.1)	0	0	0.295917	lower
115	temporal similarity	Receptors	5HT2a	clear	0.072505	0.123641	-1.44789	0	(0.9, 0.1, 0.1)	0	0	0.295917	lower
116	temporal similarity	Celltype	Micro	clear	0.0724456	0.12368	-1.44039	0	(0.9, 0.1, 0.1)	0	0	0.295917	lower
117	temporal similarity	Receptors	5HT1a	clear	0.072436	0.123686	-1.43918	0	(0.9, 0.1, 0.1)	0	0	0.295917	lower
118	temporal similarity	Celltype	Neuro-In	mis	0.0724035	0.123707	-1.4351	0	(0.9, 3, 0.1)	0	0	0.295917	lower
119	temporal similarity	Celltype	Oligo	mis	0.0723971	0.123711	-1.4343	0	(0.9, 3, 0.1)	0	0	0.295917	lower
120	temporal similarity	Receptors	M1	mis	0.0723906	0.123715	-1.4335	0	(0.9, 3, 0.1)	0	0	0.295917	lower
121	temporal similarity	Receptors	5HT6	mis	0.0723664	0.123731	-1.43048	0	(0.9, 3, 0.1)	0	0	0.295917	lower
122	temporal similarity	Receptors	NET	mis	0.0723625	0.12373	-1.43064	0	(0.9, 3, 0.1)	0	0	0.295917	lower
123	temporal similarity	metabolism	cmr02	mis	0.0723595	0.123729	-1.43103	0	(0.9, 3, 0.1)	0	0	0.295917	lower
124	temporal similarity	Receptors	5HTT	mis	0.0723527	0.123725	-1.43191	0	(0.9, 3, 0.1)	0	0	0.295917	lower
125	temporal similarity	Receptors	GABAa	mis	0.0723505	0.123724	-1.4322	0	(0.9, 3, 0.1)	0	0	0.295917	lower
126	temporal similarity	Receptors	A4B2	mis	0.0723497	0.123723	-1.4323	0	(0.9, 3, 0.1)	0	0	0.295917	lower
127	temporal similarity	AD-realted	Cluster6	syn	0.0723495	0.123723	-1.43233	0	(0.9, 3, 0.1)	1	0	0.295917	lower
128	temporal similarity	AD-realted	Cluster1	syn	0.0723495	0.123723	-1.43233	0	(0.9, 3, 0.1)	1	0	0.295917	lower
129	temporal similarity	AD-realted	Cluster7	syn	0.0723495	0.123723	-1.43233	0	(0.9, 3, 0.1)	1	0	0.295917	lower
130	temporal similarity	AD-realted	Cluster6	spread	0.0723495	0.123723	-1.43233	0	(0.9, 3, 0.1)	0	0	0.295917	lower
131	temporal similarity	AD-realted	Cluster6	mis	0.0723495	0.123723	-1.43233	0	(0.9, 3, 0.1)	0	0	0.295917	lower
132	temporal similarity	AD-realted	Cluster6	clear	0.0723495	0.123723	-1.43233	0	(0.9, 3, 0.1)	0	0	0.295917	lower
133	temporal similarity	AD-realted	Cluster7	spread	0.0723495	0.123723	-1.43233	0	(0.9, 3, 0.1)	0	0	0.295917	lower
134	temporal similarity	AD-realted	Cluster7	mis	0.0723495	0.123723	-1.43233	0	(0.9, 3, 0.1)	0	0	0.295917	lower
135	temporal similarity	AD-realted	Cluster5	clear	0.0723495	0.123723	-1.43233	0	(0.9, 3, 0.1)	0	0	0.295917	lower
136	temporal similarity	AD-realted	Cluster5	syn	0.0723495	0.123723	-1.43233	0	(0.9, 3, 0.1)	1	0	0.295917	lower
137	temporal similarity	AD-realted	Cluster5	mis	0.0723495	0.123723	-1.43233	0	(0.9, 3, 0.1)	0	0	0.295917	lower
138	temporal similarity	AD-realted	Cluster3	syn	0.0723495	0.123723	-1.43233	0	(0.9, 3, 0.1)	1	0	0.295917	lower
139	temporal similarity	AD-realted	Cluster1	spread	0.0723495	0.123723	-1.43233	0	(0.9, 3, 0.1)	0	0	0.295917	lower
140	temporal similarity	AD-realted	Cluster1	mis	0.0723495	0.123723	-1.43233	0	(0.9, 3, 0.1)	0	0	0.295917	lower
141	temporal similarity	AD-realted	Cluster1	clear	0.0723495	0.123723	-1.43233	0	(0.9, 3, 0.1)	0	0	0.295917	lower
142	temporal similarity	AD-realted	Cluster2	syn	0.0723495	0.123723	-1.43233	0	(0.9, 3, 0.1)	1	0	0.295917	lower
143	temporal similarity	AD-realted	Cluster2	spread	0.0723495	0.123723	-1.43233	0	(0.9, 3, 0.1)	0	0	0.295917	lower
144	temporal similarity	AD-realted	Cluster2	mis	0.0723495	0.123723	-1.43233	0	(0.9, 3, 0.1)	0	0	0.295917	lower
145	temporal similarity	AD-realted	Cluster2	clear	0.0723495	0.123723	-1.43233	0	(0.9, 3, 0.1)	0	0	0.295917	lower
146	temporal similarity	AD-realted	Cluster3	spread	0.0723495	0.123723	-1.43233	0	(0.9, 3, 0.1)	0	0	0.295917	lower
147	temporal similarity	AD-realted	APOE	spread	0.0723495	0.123723	-1.43233	0	(0.9, 3, 0.1)	0	0	0.295917	lower
148	temporal similarity	AD-realted	Cluster3	mis	0.0723495	0.123723	-1.43233	0	(0.9, 3, 0.1)	0	0	0.295917	lower
149	temporal similarity	AD-realted	Cluster3	clear	0.0723495	0.123723	-1.43233	0	(0.9, 3, 0.1)	0	0	0.295917	lower
150	temporal similarity	AD-realted	Cluster4	syn	0.0723495	0.123723	-1.43233	0	(0.9, 3, 0.1)	1	0	0.295917	lower
151	temporal similarity	AD-realted	Cluster4	spread	0.0723495	0.123723	-1.43233	0	(0.9, 3, 0.1)	0	0	0.295917	lower
152	temporal similarity	AD-realted	Cluster4	mis	0.0723495	0.123723	-1.43233	0	(0.9, 3, 0.1)	0	0	0.295917	lower
153	temporal similarity	AD-realted	Cluster4	clear	0.0723495	0.123723	-1.43233	0	(0.9, 3, 0.1)	0	0	0.295917	lower
154	temporal similarity	AD-realted	Cluster5	spread	0.0723495	0.123723	-1.43233	0	(0.9, 3, 0.1)	0	0	0.295917	lower
155	temporal similarity				0.0723495	0.123723	-1.43233	0	(0.9, 3, 0.1)	0	1	0.295917	lower
156	temporal similarity	metabolism	cmr02	spread	0.0723495	0.123723	-1.43233	0	(0.9, 3, 0.1)	0	0	0.295917	lower
157	temporal similarity	Celltype	Oligo	spread	0.0723495	0.123723	-1.43233	0	(0.9, 3, 0.1)	0	0	0.295917	lower
158	temporal similarity	metabolism	cbf	spread	0.0723495	0.123723	-1.43233	0	(0.9, 3, 0.1)	0	0	0.295917	lower
159	temporal similarity	Receptors	5HT1b	spread	0.0723495	0.123723	-1.43233	0	(0.9, 3, 0.1)	0	0	0.295917	lower
160	temporal similarity	Receptors	5HT6	spread	0.0723495	0.123723	-1.43233	0	(0.9, 3, 0.1)	0	0	0.295917	lower
161	temporal similarity	Receptors	5HTT	spread	0.0723495	0.123723	-1.43233	0	(0.9, 3, 0.1)	0	0	0.295917	lower
162	temporal similarity	Receptors	A4B2	spread	0.0723495	0.123723	-1.43233	0	(0.9, 3, 0.1)	0	0	0.295917	lower
163	temporal similarity	Receptors	GABAa	spread	0.0723495	0.123723	-1.43233	0	(0.9, 3, 0.1)	0	0	0.295917	lower
164	temporal similarity	Receptors	H3	spread	0.0723495	0.123723	-1.43233	0	(0.9, 3, 0.1)	0	0	0.295917	lower
165	temporal similarity	Receptors	M1	spread	0.0723495	0.123723	-1.43233	0	(0.9, 3, 0.1)	0	0	0.295917	lower
166	temporal similarity	Receptors	mGluR5	spread	0.0723495	0.123723	-1.43233	0	(0.9, 3, 0.1)	0	0	0.295917	lower
167	temporal similarity	Receptors	NET	spread	0.0723495	0.123723	-1.43233	0	(0.9, 3, 0.1)	0	0	0.295917	lower
168	temporal similarity	Receptors	NMDA	spread	0.0723495	0.123723	-1.43233	0	(0.9, 3, 0.1)	0	0	0.295917	lower
169	temporal similarity	Microstructure	genepc1	spread	0.0723495	0.123723	-1.43233	0	(0.9, 3, 0.1)	0	0	0.295917	lower
170	temporal similarity	Microstructure	myelinmap	spread	0.0723495	0.123723	-1.43233	0	(0.9, 3, 0.1)	0	0	0.295917	lower
171	temporal similarity	Receptors	VAChT	spread	0.0723495	0.123723	-1.43233	0	(0.9, 3, 0.1)	0	0	0.295917	lower
172	temporal similarity	AD-realted	Cluster7	clear	0.0723495	0.123723	-1.43233	0	(0.9, 3, 0.1)	0	0	0.295917	lower
173	temporal similarity	metabolism	cmrglc	spread	0.0723495	0.123723	-1.43233	0	(0.9, 3, 0.1)	0	0	0.295917	lower
174	temporal similarity	Celltype	Endo	spread	0.0723495	0.123723	-1.43233	0	(0.9, 3, 0.1)	0	0	0.295917	lower
175	temporal similarity	AD-realted	APOE	mis	0.0723484	0.123722	-1.43247	0	(0.9, 3, 0.1)	0	0	0.295917	lower
176	temporal similarity	metabolism	cmrglc	mis	0.0723462	0.123721	-1.43276	0	(0.9, 0.1, 0.1)	0	0	0.295917	lower
177	temporal similarity	Receptors	5HT1b	mis	0.0723461	0.123721	-1.43276	0	(0.9, 0.1, 0.1)	0	0	0.295917	lower
178	temporal similarity	Receptors	H3	mis	0.072346	0.123721	-1.43278	0	(0.9, 0.1, 0.1)	0	0	0.295917	lower
179	temporal similarity	metabolism	cbf	mis	0.0723458	0.123721	-1.4328	0	(0.9, 0.1, 0.1)	0	0	0.295917	lower
180	temporal similarity	Microstructure	genepc1	mis	0.0723454	0.123721	-1.43285	0	(0.9, 0.1, 0.1)	0	0	0.295917	lower
181	temporal similarity	Microstructure	myelinmap	mis	0.072344	0.12372	-1.43304	0	(0.9, 0.1, 0.1)	0	0	0.295917	lower
182	temporal similarity	Celltype	Endo	mis	0.0723425	0.123719	-1.43323	0	(0.9, 0.1, 0.1)	0	0	0.295917	lower
183	temporal similarity	Receptors	5HTT	syn	0.0723409	0.123718	-1.43343	0	(0.9, 3, 0.1)	0	0	0.295917	lower
184	temporal similarity	AD-realted	MAPT	clear	0.0723044	0.123697	-1.43814	0	(0.9, 3, 0.1)	0	0	0.295917	lower
185	temporal similarity	Celltype	Astro	clear	0.0722361	0.12366	-1.4469	0	(0.01, 3, 1)	0	0	0.295917	lower
186	temporal similarity	Celltype	Neuro-Ex	syn	0.0721719	0.123625	-1.45505	0	(0.01, 3, 1)	0	0	0.295917	lower
187	temporal similarity	Celltype	Neuro-In	syn	0.0721255	0.1236	-1.46091	0	(0.01, 3, 1)	0	0	0.295917	lower
188	temporal similarity	Receptors	5HT6	syn	0.0720983	0.123586	-1.46433	0	(0.01, 3, 1)	0	0	0.295917	lower
189	temporal similarity	Cortical expansion	scalingpnc	clear	0.0719959	0.123534	-1.4771	0	(0.01, 3, 1)	0	0	0.295917	lower
190	temporal similarity	Receptors	DAT	syn	0.0717275	0.123408	-1.50987	0	(0.01, 3, 1)	0	0	0.295917	lower
191	temporal similarity	Receptors	mGluR5	syn	0.0716795	0.123386	-1.51563	0	(0.01, 3, 1)	0	0	0.295917	lower
192	temporal similarity	Cortical expansion	scaling	clear	0.0715361	0.123325	-1.53265	0	(0.01, 3, 1)	0	0	0.295917	lower
193	temporal similarity	Cortical expansion	scalinghcp	clear	0.0714545	0.123291	-1.54223	0	(0.01, 3, 1)	0	0	0.295917	lower
194	temporal similarity	Receptors	D1	syn	0.0713261	0.12324	-1.55713	0	(0.01, 3, 1)	0	0	0.295917	lower
195	temporal similarity	Receptors	MOR	syn	0.071273	0.12322	-1.56323	0	(0.01, 3, 1)	0	0	0.295917	lower
196	temporal similarity	Cortical expansion	scalingnih	clear	0.0711826	0.123186	-1.57355	0	(0.01, 3, 1)	0	0	0.295917	lower
197	temporal similarity	Receptors	NMDA	syn	0.070941	0.123101	-1.60067	0	(0.01, 3, 1)	0	0	0.295917	lower
