# Supplementary material for: Brain network dynamics determine tau presence while regional vulnerability governs tau load in Alzheimer’s disease
Source: bioRxiv preprint, doi:10.1101/2025.04.17.648358, version 4 (2026-01-28)
Supplement: Supplementary Table 6 [file 648358_file04.xlsx]

## Sheet: Subtype1
	Connectivity	Factor type	Factor	Rate	R	MSE	EV	Time	Hyperparam	Best rate	Baseline model	epicenter	Selected_epicenter	Final_selected	Null model (95%CI)	> Null 95%CI
1	structural connectivity	AD-realted	Abeta	spread	0.857989	0.0575556	0.681557	26603	(0.01, 0.1, 1)	1	0	entorhinal	1	1	0.427641	higher
2	structural connectivity	AD-realted	MAPT	mis	0.829726	0.102957	0.667079	644	(0.7, 2, 1)	1	0	entorhinal	1	1	0.427641	higher
3	structural connectivity	AD-realted	MAPT	syn	0.811545	0.108603	0.621588	810	(0.3, 2.5, 0.3)	0	0	entorhinal	1	0	0.427641	higher
4	structural connectivity	metabolism	cbf	clear	0.803622	0.108175	0.612997	232	(0.01, 2, 1)	1	0	entorhinal	1	1	0.427641	higher
5	structural connectivity	AD-realted	MAPT	mis	0.780606	0.0847611	0.557933	5407	(0.7, 1.5, 0.7)	1	0	precuneus	0	1	0.287947	higher
6	structural connectivity	AD-realted	MAPT	syn	0.740053	0.0781305	0.54685	2605	(0.3, 2.9, 0.1)	0	0	precuneus	0	0	0.287947	higher
7	structural connectivity	Receptors	D2	syn	0.707188	0.108029	0.488598	450	(0.9, 1.5, 0.1)	1	0	precuneus	1	1	0.287947	higher
8	structural connectivity	Receptors	D2	syn	0.706575	0.100108	0.492988	2194	(0.9, 0.9, 0.1)	1	0	entorhinal	0	1	0.427641	higher
9	structural connectivity	Receptors	D2	mis	0.704319	0.109273	0.485646	475	(0.9, 2.9, 0.1)	0	0	precuneus	1	0	0.287947	higher
10	structural connectivity	Receptors	D2	mis	0.703818	0.107834	0.491181	1437	(0.9, 1.9, 0.1)	0	0	entorhinal	0	0	0.427641	higher
11	structural connectivity	metabolism	cbf	clear	0.696579	0.0908565	0.470015	437	(0.01, 2, 1)	1	0	precuneus	0	1	0.287947	higher
12	structural connectivity	Receptors	5HT1a	spread	0.696377	0.135367	0.395237	29999	(0.7, 3, 1)	1	0	entorhinal	1	1	0.427641	higher
13	structural connectivity	Receptors	5HT1a	spread	0.695356	0.136011	0.394188	29999	(0.7, 3, 1)	1	0	precuneus	0	1	0.287947	higher
14	structural connectivity	Receptors	5HT2a	spread	0.683725	0.0844094	0.322667	19535	(0.7, 0.5, 0.9)	1	0	entorhinal	1	1	0.427641	higher
15	structural connectivity	Receptors	5HT1a	syn	0.681652	0.10323	0.41669	517	(0.5, 3, 1)	0	0	entorhinal	1	0	0.427641	higher
16	structural connectivity	AD-realted	MAPT	spread	0.680756	0.105142	0.426562	3961	(0.9, 3, 0.1)	0	0	entorhinal	1	0	0.427641	higher
17	structural connectivity	Receptors	5HT1a	mis	0.671681	0.075775	0.356692	14224	(0.3, 3, 1)	0	0	entorhinal	1	0	0.427641	higher
18	structural connectivity	Receptors	5HT1a	mis	0.671621	0.0758826	0.356523	14386	(0.3, 3, 1)	0	0	precuneus	0	0	0.287947	higher
19	structural connectivity	Cortical expansion	evoexp	mis	0.666001	0.203672	0.281987	431	(0.9, 1.5, 0.5)	1	0	entorhinal	1	1	0.427641	higher
20	structural connectivity	Receptors	5HT1a	syn	0.665047	0.1055	0.383265	632	(0.5, 3, 1)	0	0	precuneus	0	0	0.287947	higher
21	structural connectivity	Receptors	5HT4	spread	0.663912	0.0943681	0.358963	918	(0.9, 3, 1)	1	0	entorhinal	1	1	0.427641	higher
22	structural connectivity	Receptors	5HT4	mis	0.663392	0.127998	0.399238	310	(0.9, 2.9, 0.7)	0	0	entorhinal	1	0	0.427641	higher
23	structural connectivity	Cortical expansion	evoexp	syn	0.662687	0.206233	0.294693	306	(0.9, 1, 0.3)	0	0	entorhinal	1	0	0.427641	higher
24	structural connectivity	Receptors	5HT4	mis	0.660934	0.17294	0.207764	512	(0.7, 2.5, 0.5)	1	0	precuneus	0	0	0.287947	higher
25	structural connectivity	Receptors	D2	spread	0.656923	0.0708762	0.337128	29999	(0.9, 3, 1)	0	0	entorhinal	1	0	0.427641	higher
26	structural connectivity	Receptors	D2	spread	0.655435	0.100278	0.344505	29999	(0.7, 2.5, 0.9)	0	0	precuneus	0	0	0.287947	higher
27	structural connectivity	Receptors	5HT4	syn	0.654422	0.153207	0.301646	549	(0.9, 1, 0.7)	0	0	precuneus	1	0	0.287947	higher
28	structural connectivity	Cortical expansion	evoexp	spread	0.654206	0.0661975	0.280352	1664	(0.9, 1.5, 0.1)	0	0	entorhinal	1	0	0.427641	higher
29	structural connectivity	Receptors	5HT4	syn	0.64749	0.157312	0.347964	793	(0.9, 1, 0.1)	0	0	entorhinal	0	0	0.427641	higher
30	structural connectivity	Receptors	MOR	spread	0.641668	0.064152	0.170368	1350	(0.9, 1.5, 0.1)	1	0	entorhinal	1	1	0.427641	higher
31	structural connectivity	Receptors	CB1	spread	0.634908	0.0677973	0.20724	1492	(0.9, 1.5, 0.1)	1	0	entorhinal	1	1	0.427641	higher
32	structural connectivity	Microstructure	thickness	spread	0.632305	0.0760443	0.291515	929	(0.9, 1.5, 0.3)	1	0	entorhinal	1	1	0.427641	higher
33	structural connectivity	Cortical expansion	devexp	spread	0.624325	0.0978587	0.181552	2347	(0.9, 3, 0.1)	1	0	entorhinal	1	1	0.427641	higher
34	structural connectivity	Receptors	5HT4	spread	0.622579	0.101494	0.306851	29247	(0.9, 3, 1)	0	0	precuneus	0	1	0.287947	higher
35	structural connectivity	Microstructure	thickness	mis	0.622399	0.120333	0.278523	1167	(0.9, 2, 0.1)	0	0	entorhinal	1	0	0.427641	higher
36	structural connectivity	Microstructure	thickness	syn	0.620679	0.107285	0.311413	1914	(0.7, 1.5, 0.1)	0	0	entorhinal	1	0	0.427641	higher
37	structural connectivity	Cortical expansion	scalingnih	syn	0.620172	0.124812	0.348995	178	(0.9, 2.9, 0.3)	1	0	entorhinal	1	1	0.427641	higher
38	structural connectivity	Receptors	5HT1b	clear	0.619584	0.118711	0.353053	153	(0.1, 3, 1)	1	0	entorhinal	1	1	0.427641	higher
39	structural connectivity	metabolism	cmrglc	clear	0.619302	0.115629	0.331268	141	(0.5, 3, 1)	1	0	entorhinal	1	1	0.427641	higher
40	structural connectivity	Microstructure	thickness	spread	0.616662	0.202946	0.271262	29999	(0.7, 3, 1)	1	0	precuneus	0	1	0.287947	higher
41	structural connectivity	Microstructure	thickness	syn	0.614166	0.111696	0.301426	2497	(0.9, 0.9, 0.1)	0	0	precuneus	0	0	0.287947	higher
42	structural connectivity	Microstructure	thickness	mis	0.610359	0.111476	0.296824	1745	(0.9, 1.9, 0.1)	0	0	precuneus	0	0	0.287947	higher
43	structural connectivity	Receptors	5HT2a	mis	0.60268	0.234003	-0.140635	755	(0.7, 2, 0.3)	0	0	entorhinal	1	0	0.427641	higher
44	structural connectivity	Receptors	5HT2a	syn	0.602335	0.246141	-0.090201	552	(0.3, 2.9, 0.1)	0	0	entorhinal	1	0	0.427641	higher
45	structural connectivity	AD-realted	MAPT	spread	0.595145	0.251289	0.252784	29999	(0.7, 2, 1)	0	0	precuneus	0	0	0.287947	higher
46	structural connectivity	Cortical expansion	scalinghcp	mis	0.593317	0.245249	-0.245336	343	(0.9, 1.9, 0.1)	1	0	entorhinal	1	1	0.427641	higher
47	structural connectivity	Cortical expansion	devexp	syn	0.58953	0.240125	-0.380421	931	(0.9, 0.9, 0.1)	0	0	entorhinal	1	0	0.427641	higher
48	structural connectivity	Cortical expansion	devexp	mis	0.587584	0.238671	-0.351116	757	(0.9, 1.9, 0.1)	0	0	entorhinal	1	0	0.427641	higher
49	structural connectivity	Cortical expansion	scalinghcp	syn	0.586116	0.116648	0.298211	155	(0.9, 3, 0.7)	0	0	entorhinal	1	0	0.427641	higher
50	structural connectivity	Receptors	5HT1b	clear	0.58038	0.11408	0.287799	783	(0.01, 3, 0.5)	1	0	precuneus	0	1	0.287947	higher
51	structural connectivity	Receptors	VAChT	clear	0.57225	0.236907	-0.113115	54	(0.7, 3, 1)	1	0	entorhinal	1	1	0.427641	higher
52	structural connectivity	AD-realted	Abeta	spread	0.569732	0.120972	0.263402	29999	(0.9, 3, 1)	1	0	precuneus	0	1	0.287947	higher
53	structural connectivity	Receptors	MOR	spread	0.568178	0.107125	0.0553777	29999	(0.9, 3, 1)	1	0	precuneus	0	1	0.287947	higher
54	structural connectivity	Receptors	GABAa	clear	0.563633	0.154082	0.143815	85	(0.9, 3, 1)	1	0	entorhinal	1	1	0.427641	higher
55	structural connectivity	Cortical expansion	evoexp	spread	0.561505	0.0989535	0.147519	29999	(0.9, 3, 1)	1	0	precuneus	0	0	0.287947	higher
56	structural connectivity	Cortical expansion	scaling	syn	0.561359	0.140308	0.261936	199	(0.9, 3, 0.1)	1	0	entorhinal	1	1	0.427641	higher
57	structural connectivity	Cortical expansion	scalingpnc	spread	0.561187	0.0866624	0.117804	1698	(0.9, 3, 0.1)	1	0	entorhinal	1	1	0.427641	higher
58	structural connectivity	AD-realted	APOE	clear	0.556899	0.170372	0.227267	29999	(0.7, 3, 1)	1	0	precuneus	1	1	0.287947	higher
59	structural connectivity	metabolism	cmrglc	clear	0.556028	0.12191	0.258647	649	(0.01, 3, 1)	1	0	precuneus	0	1	0.287947	higher
60	structural connectivity	Cortical expansion	scalingnih	spread	0.555084	0.0968537	0.101763	2080	(0.9, 3, 0.1)	0	0	entorhinal	1	0	0.427641	higher
61	structural connectivity	AD-realted	APOE	clear	0.554498	0.169203	0.218601	29999	(0.5, 3, 1)	1	0	entorhinal	0	1	0.427641	higher
62	structural connectivity	Cortical expansion	scaling	spread	0.552347	0.126469	0.0408494	5291	(0.01, 0.9, 1)	0	0	entorhinal	1	0	0.427641	higher
63	structural connectivity	Celltype	OPC	spread	0.550457	0.0973811	0.151243	442	(0.9, 3, 1)	1	0	entorhinal	1	1	0.427641	higher
64	structural connectivity	Cortical expansion	scalingnih	mis	0.547575	0.147567	0.185635	460	(0.9, 3, 0.1)	0	0	entorhinal	1	0	0.427641	higher
65	structural connectivity	Cortical expansion	scalinghcp	spread	0.547298	0.0980749	0.135915	1977	(0.9, 3, 0.1)	0	0	entorhinal	1	0	0.427641	higher
66	structural connectivity	Celltype	Astro	spread	0.543432	0.100301	0.138123	389	(0.9, 3, 1)	1	0	entorhinal	1	1	0.427641	higher
67	structural connectivity	Receptors	mGluR5	spread	0.538576	0.106654	0.0716872	265	(0.9, 3, 1)	1	0	entorhinal	1	1	0.427641	higher
68	structural connectivity	Receptors	NET	clear	0.538072	0.110796	0.171302	126	(0.7, 3, 1)	1	0	entorhinal	1	1	0.427641	higher
69	structural connectivity	Receptors	5HT2a	mis	0.533934	0.257394	-0.273996	882	(0.7, 2.5, 0.1)	1	0	precuneus	0	0	0.287947	higher
70	structural connectivity	Cortical expansion	scaling	mis	0.533779	0.233128	-0.546051	169	(0.9, 3, 0.1)	0	0	entorhinal	1	0	0.427641	higher
71	structural connectivity	Celltype	Micro	spread	0.53213	0.127402	0.0850664	214	(0.9, 2.9, 1)	1	0	entorhinal	1	1	0.427641	higher
72	structural connectivity	metabolism	cmr02	clear	0.530445	0.127036	0.214472	181	(0.7, 3, 1)	1	0	entorhinal	1	1	0.427641	higher
73	structural connectivity	Receptors	D1	spread	0.526114	0.0917767	0.0198448	312	(0.9, 2.9, 1)	1	0	entorhinal	1	1	0.427641	higher
74	structural connectivity	Receptors	CB1	spread	0.522578	0.117855	0.0015596	29999	(0.9, 3, 1)	1	0	precuneus	0	1	0.287947	higher
75	structural connectivity	Celltype	Astro	mis	0.520753	0.226682	-0.353396	541	(0.05, 3, 0.7)	0	0	entorhinal	1	0	0.427641	higher
76	structural connectivity	Cortical expansion	evoexp	mis	0.520117	0.237375	-0.200498	200	(0.9, 3, 0.1)	0	0	precuneus	0	1	0.287947	higher
77	structural connectivity	metabolism	cbf	syn	0.520024	0.293201	-0.309569	29999	(0.01, 3, 1)	0	0	entorhinal	1	0	0.427641	higher
78	structural connectivity	metabolism	cbf	syn	0.519687	0.292704	-0.31105	29999	(0.01, 3, 1)	0	0	precuneus	0	0	0.287947	higher
79	structural connectivity	AD-realted	Cluster3	clear	0.517616	0.119001	0.0930993	278	(0.9, 2.5, 1)	1	0	entorhinal	1	1	0.427641	higher
80	structural connectivity	AD-realted	Cluster2	mis	0.517616	0.119001	0.0930993	278	(0.9, 2.5, 1)	0	0	entorhinal	1	0	0.427641	higher
81	structural connectivity	AD-realted	Cluster6	clear	0.517616	0.119001	0.0930993	278	(0.9, 2.5, 1)	1	0	entorhinal	1	1	0.427641	higher
82	structural connectivity	AD-realted	Cluster2	spread	0.517616	0.119001	0.0930993	278	(0.9, 2.5, 1)	0	0	entorhinal	1	0	0.427641	higher
83	structural connectivity	AD-realted	Cluster5	spread	0.517616	0.119001	0.0930993	278	(0.9, 2.5, 1)	0	0	entorhinal	1	0	0.427641	higher
84	structural connectivity	AD-realted	Cluster5	mis	0.517616	0.119001	0.0930993	278	(0.9, 2.5, 1)	0	0	entorhinal	1	0	0.427641	higher
85	structural connectivity	AD-realted	Cluster5	syn	0.517616	0.119001	0.0930993	278	(0.9, 2.5, 1)	1	0	entorhinal	1	1	0.427641	higher
86	structural connectivity	AD-realted	Cluster2	clear	0.517616	0.119001	0.0930993	278	(0.9, 2.5, 1)	0	0	entorhinal	1	0	0.427641	higher
87	structural connectivity	AD-realted	Cluster2	syn	0.517616	0.119001	0.0930993	278	(0.9, 2.5, 1)	1	0	entorhinal	1	1	0.427641	higher
88	structural connectivity	AD-realted	Cluster5	clear	0.517616	0.119001	0.0930993	278	(0.9, 2.5, 1)	0	0	entorhinal	1	0	0.427641	higher
89	structural connectivity	AD-realted	Cluster1	spread	0.517616	0.119001	0.0930993	278	(0.9, 2.5, 1)	0	0	entorhinal	1	0	0.427641	higher
90	structural connectivity	AD-realted	Cluster7	clear	0.517616	0.119001	0.0930993	278	(0.9, 2.5, 1)	0	0	entorhinal	1	0	0.427641	higher
91	structural connectivity	AD-realted	Cluster6	syn	0.517616	0.119001	0.0930993	278	(0.9, 2.5, 1)	0	0	entorhinal	1	0	0.427641	higher
92	structural connectivity	AD-realted	Cluster6	spread	0.517616	0.119001	0.0930993	278	(0.9, 2.5, 1)	0	0	entorhinal	1	0	0.427641	higher
93	structural connectivity	AD-realted	Cluster4	mis	0.517616	0.119001	0.0930993	278	(0.9, 2.5, 1)	0	0	entorhinal	1	0	0.427641	higher
94	structural connectivity	AD-realted	Cluster6	mis	0.517616	0.119001	0.0930993	278	(0.9, 2.5, 1)	0	0	entorhinal	1	0	0.427641	higher
95	structural connectivity	AD-realted	Cluster4	spread	0.517616	0.119001	0.0930993	278	(0.9, 2.5, 1)	0	0	entorhinal	1	0	0.427641	higher
96	structural connectivity	AD-realted	Cluster4	syn	0.517616	0.119001	0.0930993	278	(0.9, 2.5, 1)	1	0	entorhinal	1	1	0.427641	higher
97	structural connectivity	AD-realted	Cluster1	mis	0.517616	0.119001	0.0930993	278	(0.9, 2.5, 1)	0	0	entorhinal	1	0	0.427641	higher
98	structural connectivity	AD-realted	Cluster1	syn	0.517616	0.119001	0.0930993	278	(0.9, 2.5, 1)	1	0	entorhinal	1	1	0.427641	higher
99	structural connectivity	AD-realted	Cluster3	mis	0.517616	0.119001	0.0930993	278	(0.9, 2.5, 1)	0	0	entorhinal	1	0	0.427641	higher
100	structural connectivity				0.517616	0.119001	0.0930993	278	(0.9, 2.5, 1)	0	1	entorhinal	1	0	0.427641	higher
101	structural connectivity	AD-realted	Cluster3	spread	0.517616	0.119001	0.0930993	278	(0.9, 2.5, 1)	0	0	entorhinal	1	0	0.427641	higher
102	structural connectivity	AD-realted	Cluster7	spread	0.517616	0.119001	0.0930993	278	(0.9, 2.5, 1)	0	0	entorhinal	1	0	0.427641	higher
103	structural connectivity	AD-realted	Cluster7	mis	0.517616	0.119001	0.0930993	278	(0.9, 2.5, 1)	0	0	entorhinal	1	0	0.427641	higher
104	structural connectivity	AD-realted	Cluster1	clear	0.517616	0.119001	0.0930993	278	(0.9, 2.5, 1)	0	0	entorhinal	1	0	0.427641	higher
105	structural connectivity	AD-realted	Cluster7	syn	0.517616	0.119001	0.0930993	278	(0.9, 2.5, 1)	1	0	entorhinal	1	1	0.427641	higher
106	structural connectivity	AD-realted	Cluster4	clear	0.517616	0.119001	0.0930993	278	(0.9, 2.5, 1)	0	0	entorhinal	1	0	0.427641	higher
107	structural connectivity	AD-realted	Cluster3	syn	0.517616	0.119001	0.0930993	278	(0.9, 2.5, 1)	0	0	entorhinal	1	0	0.427641	higher
108	structural connectivity	Receptors	DAT	spread	0.517481	0.107664	0.0695264	326	(0.9, 2.9, 1)	1	0	entorhinal	1	1	0.427641	higher
109	structural connectivity	Receptors	5HT2a	syn	0.511951	0.232929	-0.11025	726	(0.5, 2, 0.1)	0	0	precuneus	0	0	0.287947	higher
110	structural connectivity	Receptors	M1	spread	0.510417	0.124451	0.0103902	213	(0.9, 3, 0.9)	1	0	entorhinal	1	1	0.427641	higher
111	structural connectivity	metabolism	cmr02	clear	0.50932	0.160449	0.0939945	29999	(0.7, 3, 1)	1	0	precuneus	0	1	0.287947	higher
112	structural connectivity	Cortical expansion	evoexp	syn	0.507428	0.238259	-0.215782	167	(0.9, 1.9, 0.1)	0	0	precuneus	0	0	0.287947	higher
113	structural connectivity	AD-realted	Abeta	syn	0.506936	0.154219	0.0417634	181	(0.9, 3, 0.1)	0	0	entorhinal	1	0	0.427641	higher
114	structural connectivity	Receptors	5HT6	spread	0.504617	0.114195	0.00688316	243	(0.9, 3, 1)	1	0	entorhinal	1	1	0.427641	higher
115	structural connectivity	Receptors	A4B2	clear	0.503756	0.17466	0.072734	72	(0.7, 3, 1)	1	0	entorhinal	1	1	0.427641	higher
116	structural connectivity	Cortical expansion	devexp	mis	0.502591	0.255099	-0.623537	3905	(0.7, 2, 0.1)	1	0	precuneus	0	0	0.287947	higher
117	structural connectivity	Celltype	Oligo	clear	0.493774	0.11837	0.0825932	13624	(0.1, 1.5, 0.3)	1	0	precuneus	1	1	0.287947	higher
118	structural connectivity	Celltype	Oligo	clear	0.493567	0.118503	0.0850489	13807	(0.1, 1.5, 0.3)	1	0	entorhinal	0	1	0.427641	higher
119	structural connectivity	Receptors	H3	spread	0.492797	0.144863	0.0159341	252	(0.9, 3, 1)	1	0	entorhinal	1	1	0.427641	higher
120	structural connectivity	Receptors	5HTT	syn	0.491916	0.117376	-0.305229	25274	(0.01, 0.9, 0.3)	1	0	entorhinal	1	1	0.427641	higher
121	structural connectivity	Celltype	OPC	mis	0.489296	0.256443	-0.447066	266	(0.9, 1.5, 1)	0	0	entorhinal	1	0	0.427641	higher
122	structural connectivity	metabolism	cmrglc	syn	0.48905	0.2969	-0.350223	29999	(0.01, 3, 1)	0	0	precuneus	1	0	0.287947	higher
123	structural connectivity	metabolism	cmrglc	syn	0.488972	0.296514	-0.351404	29999	(0.01, 3, 1)	0	0	entorhinal	0	0	0.427641	higher
124	structural connectivity	Celltype	Astro	syn	0.487851	0.247691	-0.245596	270	(0.9, 1.5, 0.7)	1	0	precuneus	1	0	0.287947	higher
125	structural connectivity	Celltype	Astro	syn	0.485673	0.231302	-0.257979	245	(0.9, 1.5, 1)	0	0	entorhinal	0	0	0.427641	higher
126	structural connectivity	Receptors	5HT1b	syn	0.484718	0.245215	-0.289581	29999	(0.01, 3, 1)	0	0	entorhinal	1	0	0.427641	higher
127	structural connectivity	Receptors	5HT1b	syn	0.484104	0.244699	-0.291439	29999	(0.01, 3, 1)	0	0	precuneus	0	0	0.287947	higher
128	structural connectivity	AD-realted	Abeta	mis	0.483423	0.258141	-0.6884	114	(0.9, 3, 0.5)	0	0	entorhinal	1	0	0.427641	higher
129	structural connectivity	Celltype	Neuro-Ex	spread	0.481543	0.11287	-0.0666774	213	(0.9, 3, 1)	1	0	entorhinal	1	1	0.427641	higher
130	structural connectivity	Celltype	Astro	mis	0.480262	0.253775	-0.239937	296	(0.9, 2.9, 0.3)	0	0	precuneus	0	0	0.287947	higher
131	structural connectivity	Receptors	A4B2	spread	0.479218	0.113085	-0.10586	254	(0.9, 3, 0.9)	0	0	entorhinal	1	0	0.427641	higher
132	structural connectivity	Receptors	NET	clear	0.478739	0.263604	-0.0199299	29999	(0.01, 2.5, 1)	1	0	precuneus	0	1	0.287947	higher
133	structural connectivity	Receptors	GABAa	clear	0.475667	0.101553	-0.0807142	17748	(0.05, 2.5, 0.1)	1	0	precuneus	0	1	0.287947	higher
134	structural connectivity	Celltype	Neuro-In	spread	0.475183	0.123615	-0.0658365	213	(0.9, 3, 0.9)	1	0	entorhinal	1	1	0.427641	higher
135	structural connectivity	Celltype	OPC	syn	0.475009	0.26805	-0.562335	181	(0.9, 1.5, 0.7)	0	0	entorhinal	1	0	0.427641	higher
136	structural connectivity	metabolism	cbv	spread	0.469787	0.16773	0.000742279	191	(0.9, 3, 1)	1	0	entorhinal	1	1	0.427641	higher
137	structural connectivity	Receptors	VAChT	spread	0.469194	0.11336	-0.122123	253	(0.9, 3, 1)	0	0	entorhinal	1	0	0.427641	higher
138	structural connectivity	Receptors	NET	spread	0.468341	0.115261	-0.111387	237	(0.9, 3, 1)	0	0	entorhinal	1	0	0.427641	higher
139	structural connectivity	Cortical expansion	scalingnih	syn	0.468014	0.13992	0.0410731	4373	(0.5, 2, 0.1)	1	0	precuneus	0	1	0.287947	higher
140	structural connectivity	Receptors	NMDA	spread	0.465789	0.111249	-0.0943245	250	(0.9, 3, 1)	1	0	entorhinal	1	1	0.427641	higher
141	structural connectivity	Receptors	GABAa	spread	0.46243	0.121802	-0.0774274	241	(0.9, 3, 1)	0	0	entorhinal	1	0	0.427641	higher
142	structural connectivity	Receptors	5HTT	spread	0.457647	0.143528	-0.067851	208	(0.9, 3, 1)	0	0	entorhinal	1	0	0.427641	higher
143	structural connectivity	Microstructure	myelinmap	spread	0.454345	0.169755	-0.0495057	190	(0.9, 3, 1)	1	0	entorhinal	1	1	0.427641	higher
144	structural connectivity	Celltype	Endo	syn	0.450799	0.127345	-0.401771	27708	(0.01, 0.9, 0.3)	1	0	entorhinal	1	1	0.427641	higher
145	structural connectivity	Celltype	Endo	spread	0.442571	0.149106	-0.120047	199	(0.9, 3, 1)	0	0	entorhinal	1	0	0.427641	higher
146	structural connectivity	Celltype	Neuro-Ex	syn	0.441757	0.1741	-0.386609	5459	(0.3, 2, 0.1)	0	0	entorhinal	1	0	0.427641	higher
147	structural connectivity	Cortical expansion	scalinghcp	syn	0.441456	0.153932	0.0890818	3524	(0.7, 1.9, 0.1)	1	0	precuneus	0	0	0.287947	higher
148	structural connectivity	Cortical expansion	scalingnih	mis	0.44135	0.15304	0.0603184	3564	(0.7, 2.9, 0.1)	0	0	precuneus	0	0	0.287947	higher
149	structural connectivity	Receptors	5HT1b	spread	0.4407	0.128848	-0.155556	244	(0.9, 3, 0.9)	0	0	entorhinal	1	0	0.427641	higher
150	structural connectivity	Receptors	A4B2	clear	0.440197	0.17887	0.119372	959	(0.9, 0.9, 0.1)	1	0	precuneus	0	1	0.287947	higher
151	structural connectivity	Microstructure	genepc1	spread	0.438931	0.168322	-0.0838541	190	(0.9, 3, 1)	1	0	entorhinal	1	1	0.427641	higher
152	structural connectivity	Celltype	Oligo	syn	0.438736	0.149378	-0.420605	27743	(0.01, 0.9, 0.3)	0	0	entorhinal	1	0	0.427641	higher
153	structural connectivity	metabolism	cmr02	spread	0.438662	0.154045	-0.0931476	199	(0.9, 3, 1)	0	0	entorhinal	1	0	0.427641	higher
154	structural connectivity	AD-realted	APOE	spread	0.437059	0.157917	-0.0895235	200	(0.9, 3, 1)	0	0	entorhinal	1	0	0.427641	higher
155	structural connectivity	Celltype	Oligo	spread	0.435998	0.163892	-0.0907794	207	(0.9, 3, 1)	0	0	entorhinal	1	0	0.427641	higher
156	structural connectivity	AD-realted	APOE	syn	0.434297	0.310871	-0.468021	29826	(0.01, 3, 1)	0	0	entorhinal	1	0	0.427641	higher
157	structural connectivity	AD-realted	APOE	syn	0.433245	0.311083	-0.473441	29999	(0.01, 3, 1)	0	0	precuneus	0	0	0.287947	higher
158	structural connectivity	Cortical expansion	scalinghcp	mis	0.432554	0.174925	0.109612	2676	(0.9, 2.5, 0.1)	0	0	precuneus	0	1	0.287947	higher
159	structural connectivity	Receptors	H3	clear	0.432441	0.175418	0.046833	77	(0.7, 3, 1)	0	0	entorhinal	1	0	0.427641	higher
160	structural connectivity	metabolism	cmrglc	spread	0.432094	0.149955	-0.117762	203	(0.9, 3, 1)	0	0	entorhinal	1	0	0.427641	higher
161	structural connectivity	Cortical expansion	devexp	syn	0.43072	0.255712	-1.07661	868	(0.9, 0.9, 0.1)	0	0	precuneus	0	0	0.287947	higher
162	structural connectivity	metabolism	cmr02	syn	0.429898	0.299556	-0.565819	29999	(0.01, 3, 1)	0	0	entorhinal	1	0	0.427641	higher
163	structural connectivity	metabolism	cmr02	syn	0.429658	0.299675	-0.566247	29999	(0.01, 3, 1)	0	0	precuneus	0	0	0.287947	higher
164	structural connectivity	Cortical expansion	scaling	syn	0.425013	0.186169	0.105506	3333	(0.9, 1, 0.1)	1	0	precuneus	0	1	0.287947	higher
165	structural connectivity	Microstructure	genepc1	clear	0.419677	0.25742	-0.0859892	29999	(0.7, 3, 1)	0	0	entorhinal	1	0	0.427641	lower
166	structural connectivity	Cortical expansion	scaling	mis	0.419211	0.192934	0.104275	3305	(0.9, 2, 0.1)	0	0	precuneus	0	0	0.287947	higher
167	structural connectivity	Microstructure	genepc1	clear	0.418778	0.256981	-0.0880931	29999	(0.7, 3, 1)	1	0	precuneus	0	0	0.287947	higher
168	structural connectivity	Cortical expansion	scalingpnc	syn	0.413997	0.219021	-0.161994	76	(0.9, 3, 0.3)	0	0	entorhinal	1	0	0.427641	lower
169	structural connectivity	metabolism	cbf	spread	0.413232	0.190054	-0.210624	270	(0.9, 3, 0.1)	0	0	entorhinal	1	0	0.427641	lower
170	structural connectivity	Celltype	Neuro-Ex	mis	0.411889	0.215572	-0.423631	9626	(0.3, 2.9, 0.1)	0	0	entorhinal	1	0	0.427641	lower
171	structural connectivity	Receptors	NET	syn	0.411101	0.264995	-0.454842	29999	(0.01, 3, 1)	0	0	entorhinal	1	0	0.427641	lower
172	structural connectivity	Receptors	NET	syn	0.410509	0.264829	-0.458299	29999	(0.01, 3, 1)	0	0	precuneus	0	0	0.287947	higher
173	structural connectivity	Microstructure	myelinmap	clear	0.408225	0.222415	-0.0464823	29999	(0.9, 3, 1)	0	0	entorhinal	1	0	0.427641	lower
174	structural connectivity	Microstructure	myelinmap	clear	0.407393	0.222318	-0.0480872	29999	(0.9, 3, 1)	1	0	precuneus	0	0	0.287947	higher
175	structural connectivity	Receptors	DAT	syn	0.405637	0.207787	-0.611818	16658	(0.01, 1.5, 0.1)	0	0	entorhinal	1	0	0.427641	lower
176	structural connectivity	Receptors	A4B2	syn	0.405484	0.288613	-0.540267	29999	(0.01, 3, 1)	0	0	entorhinal	1	0	0.427641	lower
177	structural connectivity	Receptors	A4B2	syn	0.405041	0.287931	-0.542997	29999	(0.01, 3, 1)	0	0	precuneus	0	0	0.287947	higher
178	structural connectivity	Celltype	Endo	clear	0.403447	0.234668	-0.258382	518	(0.9, 0.1, 0.1)	0	0	entorhinal	1	0	0.427641	lower
179	structural connectivity	Receptors	CB1	mis	0.40167	0.179018	-0.907719	29999	(0.01, 1, 1)	0	0	entorhinal	1	0	0.427641	lower
180	structural connectivity	Cortical expansion	scalingpnc	mis	0.399244	0.17328	-0.533301	21259	(0.01, 1, 0.9)	0	0	entorhinal	1	0	0.427641	lower
181	structural connectivity	Celltype	OPC	mis	0.398938	0.236085	-0.370125	273	(0.9, 3, 0.7)	1	0	precuneus	0	0	0.287947	higher
182	structural connectivity	Celltype	OPC	syn	0.395454	0.246071	-0.334867	184	(0.9, 2.5, 0.1)	0	0	precuneus	0	0	0.287947	higher
183	structural connectivity	Celltype	Neuro-In	syn	0.393845	0.222871	-0.619823	10890	(0.01, 2, 0.1)	0	0	entorhinal	1	0	0.427641	lower
184	structural connectivity	Receptors	M1	mis	0.386782	0.183319	-0.849161	29999	(0.01, 1, 1)	0	0	entorhinal	1	0	0.427641	lower
185	structural connectivity	Celltype	Micro	mis	0.384068	0.160328	-0.657153	18270	(0.01, 1.5, 0.5)	0	0	entorhinal	1	0	0.427641	lower
186	structural connectivity	Receptors	5HT2a	spread	0.383837	0.177423	-0.0935403	29999	(0.9, 3, 1)	0	0	precuneus	0	1	0.287947	higher
187	structural connectivity	Celltype	Neuro-Ex	clear	0.379275	0.16706	-0.627471	23502	(0.01, 0.5, 0.9)	0	0	entorhinal	1	0	0.427641	lower
188	structural connectivity	Receptors	CB1	syn	0.377622	0.14948	-0.288605	180	(0.9, 3, 0.1)	0	0	entorhinal	1	0	0.427641	lower
189	structural connectivity	Celltype	Micro	syn	0.377438	0.211751	-0.688702	13459	(0.01, 2, 0.1)	0	0	entorhinal	1	0	0.427641	lower
190	structural connectivity	Microstructure	genepc1	syn	0.372744	0.299075	-0.726395	29999	(0.01, 3, 1)	0	0	entorhinal	1	0	0.427641	lower
191	structural connectivity	Microstructure	genepc1	syn	0.372395	0.299754	-0.726597	29999	(0.01, 3, 1)	0	0	precuneus	0	0	0.287947	higher
192	structural connectivity	Celltype	Neuro-In	clear	0.371634	0.168744	-0.701132	25094	(0.01, 0.5, 0.5)	0	0	entorhinal	1	0	0.427641	lower
193	structural connectivity	Receptors	mGluR5	clear	0.368056	0.266118	-0.7222	14111	(0.01, 0.5, 0.1)	0	0	entorhinal	1	0	0.427641	lower
194	structural connectivity	Receptors	VAChT	syn	0.367906	0.178851	-1.28175	18648	(0.01, 0.9, 0.5)	0	0	entorhinal	1	0	0.427641	lower
195	structural connectivity	Receptors	5HT2a	clear	0.367184	0.267419	-0.650604	17295	(0.01, 0.5, 0.1)	0	0	entorhinal	1	0	0.427641	lower
196	structural connectivity	Receptors	M1	clear	0.365482	0.256228	-0.54873	10107	(0.01, 0.9, 0.1)	0	0	entorhinal	1	0	0.427641	lower
197	structural connectivity	Receptors	NMDA	clear	0.363176	0.245193	-0.888041	25673	(0.05, 0.5, 0.1)	0	0	entorhinal	1	0	0.427641	lower
198	structural connectivity	Receptors	D1	mis	0.35892	0.256602	-0.767417	24227	(0.01, 1.9, 0.1)	0	0	entorhinal	1	0	0.427641	lower
199	structural connectivity	metabolism	cbv	syn	0.357674	0.20182	-0.91378	20228	(0.01, 0.9, 0.3)	0	0	entorhinal	1	0	0.427641	lower
200	structural connectivity	Receptors	MOR	mis	0.356774	0.281732	-0.877708	29999	(0.01, 1.5, 0.1)	0	0	entorhinal	1	0	0.427641	lower
201	structural connectivity	AD-realted	Abeta	clear	0.355751	0.280568	-0.729936	19674	(0.01, 0.1, 0.1)	0	0	entorhinal	1	0	0.427641	lower
202	structural connectivity	Cortical expansion	scalingpnc	clear	0.353281	0.286703	-0.808125	23169	(0.01, 0.1, 0.1)	0	0	entorhinal	1	0	0.427641	lower
203	structural connectivity	Cortical expansion	devexp	clear	0.353129	0.277233	-0.742515	27362	(0.01, 0.1, 0.1)	0	0	entorhinal	1	0	0.427641	lower
204	structural connectivity	Receptors	DAT	mis	0.352367	0.2749	-0.810004	29999	(0.01, 1.5, 0.1)	0	0	entorhinal	1	0	0.427641	lower
205	structural connectivity	Receptors	VAChT	clear	0.348512	0.192364	-0.202783	684	(0.9, 0.5, 0.1)	1	0	precuneus	0	1	0.287947	higher
206	structural connectivity	Receptors	mGluR5	mis	0.345939	0.282357	-0.820383	29999	(0.01, 1.5, 0.1)	0	0	entorhinal	1	0	0.427641	lower
207	structural connectivity	Receptors	D1	clear	0.343952	0.286711	-0.907149	15047	(0.01, 0.5, 0.1)	0	0	entorhinal	1	0	0.427641	lower
208	structural connectivity	metabolism	cbv	clear	0.342978	0.288256	-0.846789	29999	(0.01, 0.5, 0.1)	0	0	entorhinal	1	0	0.427641	lower
209	structural connectivity	Receptors	5HT6	mis	0.342059	0.286982	-0.805006	18530	(0.01, 1.5, 0.1)	0	0	entorhinal	1	0	0.427641	lower
210	structural connectivity	Cortical expansion	scaling	clear	0.341791	0.293923	-0.870077	23198	(0.01, 0.1, 0.1)	0	0	entorhinal	1	0	0.427641	lower
211	structural connectivity	Receptors	5HT6	clear	0.341672	0.202594	-0.219103	85	(0.7, 3, 1)	0	0	entorhinal	1	0	0.427641	lower
212	structural connectivity	Receptors	NMDA	syn	0.341448	0.220022	-1.16249	13355	(0.01, 0.9, 0.5)	0	0	entorhinal	1	0	0.427641	lower
213	structural connectivity	Receptors	NMDA	mis	0.3411	0.290469	-0.8566	13509	(0.01, 1.9, 0.1)	0	0	entorhinal	1	0	0.427641	lower
214	structural connectivity	Receptors	GABAa	syn	0.340616	0.263068	-0.865182	29999	(0.01, 3, 1)	0	0	entorhinal	1	0	0.427641	lower
215	structural connectivity	Receptors	GABAa	syn	0.340262	0.262654	-0.866474	29999	(0.01, 3, 1)	0	0	precuneus	0	0	0.287947	higher
216	structural connectivity	Cortical expansion	evoexp	clear	0.339811	0.292941	-0.797316	20642	(0.01, 0.1, 0.1)	0	0	entorhinal	1	0	0.427641	lower
217	structural connectivity	metabolism	cbv	mis	0.338702	0.287509	-0.817481	11429	(0.01, 1.9, 0.1)	0	0	entorhinal	1	0	0.427641	lower
218	structural connectivity	Celltype	Neuro-In	mis	0.338418	0.235793	-0.426937	2740	(0.9, 1, 1)	0	0	entorhinal	1	0	0.427641	lower
219	structural connectivity	Cortical expansion	scalingnih	clear	0.337703	0.297125	-0.885559	23762	(0.01, 0.1, 0.1)	0	0	entorhinal	1	0	0.427641	lower
220	structural connectivity	Celltype	Micro	clear	0.336279	0.295732	-0.800125	15364	(0.01, 0.5, 0.1)	0	0	entorhinal	1	0	0.427641	lower
221	structural connectivity	Receptors	CB1	clear	0.33608	0.296534	-0.834397	19673	(0.01, 0.1, 0.1)	0	0	entorhinal	1	0	0.427641	lower
222	structural connectivity	Receptors	H3	clear	0.336042	0.241408	-0.0159583	29999	(0.9, 0.9, 1)	1	0	precuneus	0	0	0.287947	higher
223	structural connectivity	Celltype	Endo	mis	0.334964	0.278303	-0.83233	15678	(0.01, 1.9, 0.1)	0	0	entorhinal	1	0	0.427641	lower
224	structural connectivity	AD-realted	Abeta	syn	0.333093	0.339875	-0.297051	29999	(0.9, 3, 1)	0	0	precuneus	0	0	0.287947	higher
225	structural connectivity	Microstructure	myelinmap	mis	0.332916	0.294557	-0.813453	16759	(0.01, 1, 0.1)	0	0	entorhinal	1	0	0.427641	lower
226	structural connectivity	Cortical expansion	scalinghcp	clear	0.332787	0.298749	-0.886918	27669	(0.01, 0.1, 0.1)	0	0	entorhinal	1	0	0.427641	lower
227	structural connectivity	Receptors	A4B2	mis	0.332202	0.301605	-0.82286	29999	(0.01, 0.5, 0.1)	0	0	entorhinal	1	0	0.427641	lower
228	structural connectivity	Cortical expansion	scalingnih	spread	0.331996	0.220001	-0.105472	29999	(0.01, 1.5, 0.9)	0	0	precuneus	0	0	0.287947	higher
229	structural connectivity	Receptors	H3	mis	0.331802	0.302784	-0.825405	29999	(0.01, 0.1, 0.1)	0	0	entorhinal	1	0	0.427641	lower
230	structural connectivity	Receptors	NET	mis	0.331798	0.300689	-0.827583	24983	(0.01, 0.5, 0.1)	0	0	entorhinal	1	0	0.427641	lower
231	structural connectivity	Receptors	VAChT	mis	0.331712	0.30293	-0.830466	29999	(0.01, 0.1, 0.1)	0	0	entorhinal	1	0	0.427641	lower
232	structural connectivity	Receptors	5HTT	mis	0.331636	0.302507	-0.825795	29999	(0.01, 0.1, 0.1)	0	0	entorhinal	1	0	0.427641	lower
233	structural connectivity	Receptors	5HT1b	mis	0.331295	0.302532	-0.827101	29999	(0.01, 0.1, 0.1)	0	0	entorhinal	1	0	0.427641	lower
234	structural connectivity	metabolism	cbf	mis	0.331039	0.302678	-0.826921	29999	(0.01, 0.1, 0.1)	0	0	entorhinal	1	0	0.427641	lower
235	structural connectivity	Microstructure	genepc1	mis	0.330854	0.297264	-0.817069	16315	(0.01, 0.9, 0.1)	0	0	entorhinal	1	0	0.427641	lower
236	structural connectivity	Receptors	GABAa	mis	0.330752	0.298103	-0.827046	17940	(0.01, 0.9, 0.1)	0	0	entorhinal	1	0	0.427641	lower
237	structural connectivity	metabolism	cmrglc	mis	0.330004	0.300736	-0.831557	21596	(0.01, 0.5, 0.1)	0	0	entorhinal	1	0	0.427641	lower
238	structural connectivity	metabolism	cmr02	mis	0.329725	0.297865	-0.832699	16344	(0.01, 0.9, 0.1)	0	0	entorhinal	1	0	0.427641	lower
239	structural connectivity	Celltype	Oligo	mis	0.329633	0.30074	-0.843029	19856	(0.01, 1, 0.1)	0	0	entorhinal	1	0	0.427641	lower
240	structural connectivity	AD-realted	APOE	mis	0.329	0.299125	-0.832336	16357	(0.01, 0.9, 0.1)	0	0	entorhinal	1	0	0.427641	lower
241	structural connectivity	Cortical expansion	scalinghcp	spread	0.328719	0.185016	-0.153366	29999	(0.01, 1.5, 1)	0	0	precuneus	0	0	0.287947	higher
242	structural connectivity	AD-realted	Abeta	mis	0.328212	0.240976	-0.0597735	726	(0.9, 3, 1)	0	0	precuneus	0	0	0.287947	higher
243	structural connectivity	Receptors	MOR	clear	0.327261	0.300321	-0.835093	22805	(0.01, 0.1, 0.1)	0	0	entorhinal	1	0	0.427641	lower
244	structural connectivity	Receptors	5HT4	clear	0.327168	0.302649	-0.837579	20560	(0.01, 0.1, 0.1)	0	0	entorhinal	1	0	0.427641	lower
245	structural connectivity	Receptors	D1	syn	0.325985	0.273391	-1.07565	2466	(0.01, 1.5, 0.5)	0	0	entorhinal	1	0	0.427641	lower
246	structural connectivity	Celltype	OPC	clear	0.32572	0.298891	-0.848111	13850	(0.01, 0.5, 0.1)	0	0	entorhinal	1	0	0.427641	lower
247	structural connectivity	Celltype	Astro	clear	0.325299	0.301994	-0.853906	14953	(0.01, 0.5, 0.1)	0	0	entorhinal	1	0	0.427641	lower
248	structural connectivity	Receptors	MOR	syn	0.324296	0.28026	-0.863502	2539	(0.01, 1.5, 0.3)	0	0	entorhinal	1	0	0.427641	lower
249	structural connectivity	Receptors	M1	syn	0.322578	0.271824	-0.570007	29999	(0.01, 3, 1)	0	0	entorhinal	1	0	0.427641	lower
250	structural connectivity	Receptors	M1	syn	0.321568	0.271717	-0.573431	29999	(0.01, 3, 1)	1	0	precuneus	0	0	0.287947	higher
251	structural connectivity	Receptors	DAT	clear	0.32122	0.305287	-0.909736	15139	(0.01, 0.5, 0.1)	0	0	entorhinal	1	0	0.427641	lower
252	structural connectivity	Cortical expansion	scaling	spread	0.319009	0.198355	-0.225499	25656	(0.7, 3, 0.1)	0	0	precuneus	0	0	0.287947	higher
253	structural connectivity	Cortical expansion	devexp	spread	0.318851	0.197223	-0.138011	29999	(0.9, 3, 1)	0	0	precuneus	0	1	0.287947	higher
254	structural connectivity	AD-realted	MAPT	clear	0.31137	0.31363	-0.909641	22815	(0.01, 0.1, 0.1)	0	0	entorhinal	1	0	0.427641	lower
255	structural connectivity	Microstructure	thickness	clear	0.310595	0.315841	-0.91836	20851	(0.01, 0.1, 0.1)	0	0	entorhinal	1	0	0.427641	lower
256	structural connectivity	Receptors	5HT1a	clear	0.308933	0.317832	-0.904324	21968	(0.01, 0.1, 0.1)	0	0	entorhinal	1	0	0.427641	lower
257	structural connectivity	Receptors	5HTT	clear	0.3073	0.229577	-0.175609	91	(0.9, 3, 0.1)	0	0	entorhinal	1	0	0.427641	lower
258	structural connectivity	Receptors	DAT	spread	0.303492	0.1817	-0.430589	29999	(0.7, 3, 1)	1	0	precuneus	0	1	0.287947	higher
259	structural connectivity	Receptors	D1	spread	0.301832	0.148612	-0.353857	29999	(0.9, 3, 1)	1	0	precuneus	0	1	0.287947	higher
260	structural connectivity	Receptors	mGluR5	syn	0.292036	0.312476	-1.12903	1841	(0.01, 0.9, 1)	0	0	entorhinal	1	0	0.427641	lower
261	structural connectivity	Celltype	Astro	spread	0.291287	0.240423	-0.379978	14119	(0.3, 3, 1)	0	0	precuneus	0	1	0.287947	higher
262	structural connectivity	Celltype	Endo	syn	0.282783	0.24632	-0.427525	29999	(0.1, 2.9, 0.7)	1	0	precuneus	0	1	0.287947	lower
263	structural connectivity	Celltype	OPC	spread	0.281404	0.1858	-0.437403	2912	(0.5, 3, 1)	0	0	precuneus	0	1	0.287947	lower
264	structural connectivity	Celltype	Endo	clear	0.281332	0.168959	-0.257378	1765	(0.9, 0.9, 0.1)	0	0	precuneus	0	0	0.287947	lower
265	structural connectivity	Cortical expansion	scalingpnc	spread	0.280961	0.272965	-0.233865	29999	(0.7, 3, 1)	1	0	precuneus	0	1	0.287947	lower
266	structural connectivity	Receptors	mGluR5	spread	0.280011	0.155603	-0.34248	29999	(0.9, 3, 1)	1	0	precuneus	0	1	0.287947	lower
267	structural connectivity	Receptors	M1	clear	0.276242	0.242728	-0.353179	10156	(0.9, 0.1, 0.3)	0	0	precuneus	0	0	0.287947	lower
268	structural connectivity	Receptors	5HT6	syn	0.272074	0.286395	-0.981728	29999	(0.01, 3, 1)	0	0	entorhinal	1	0	0.427641	lower
269	structural connectivity	Receptors	5HT6	syn	0.271306	0.285981	-0.98414	29999	(0.01, 3, 1)	1	0	precuneus	0	0	0.287947	lower
270	structural connectivity	Microstructure	myelinmap	syn	0.267412	0.324707	-1.00877	65	(0.01, 3, 1)	0	0	entorhinal	1	0	0.427641	lower
271	structural connectivity	Celltype	Oligo	syn	0.267403	0.290669	-0.556697	29999	(0.01, 3, 1)	0	0	precuneus	0	0	0.287947	lower
272	structural connectivity	Receptors	D2	clear	0.265585	0.329436	-0.893867	128	(0.7, 1, 0.1)	0	0	entorhinal	1	0	0.427641	lower
273	structural connectivity	Receptors	5HT2a	clear	0.264326	0.309032	-0.94195	6388	(0.5, 0.5, 0.1)	0	0	precuneus	0	0	0.287947	lower
274	structural connectivity	Receptors	MOR	syn	0.263078	0.291789	-0.254435	5173	(0.9, 3, 0.1)	0	0	precuneus	0	0	0.287947	lower
275	structural connectivity	Receptors	H3	syn	0.261796	0.266991	-0.977576	29999	(0.01, 3, 1)	0	0	entorhinal	1	0	0.427641	lower
276	structural connectivity	Receptors	H3	syn	0.26131	0.266714	-0.97993	29999	(0.01, 3, 1)	0	0	precuneus	0	0	0.287947	lower
277	structural connectivity	Cortical expansion	scalingpnc	mis	0.255491	0.213861	-0.171231	9104	(0.7, 3, 0.1)	0	0	precuneus	0	0	0.287947	lower
278	structural connectivity	Receptors	5HT6	clear	0.253046	0.264621	-0.495741	29999	(0.01, 3, 1)	0	0	precuneus	0	0	0.287947	lower
279	structural connectivity	Microstructure	myelinmap	syn	0.252179	0.299593	-0.95585	29999	(0.01, 3, 1)	0	0	precuneus	0	0	0.287947	lower
280	structural connectivity	Cortical expansion	scalingpnc	syn	0.242506	0.180288	-0.344136	367	(0.9, 2, 0.1)	0	0	precuneus	0	0	0.287947	lower
281	structural connectivity	Receptors	CB1	syn	0.240508	0.343569	-0.376939	1535	(0.9, 3, 1)	0	0	precuneus	0	0	0.287947	lower
282	structural connectivity	Receptors	5HTT	syn	0.23992	0.208479	-0.83547	29999	(0.3, 3, 1)	1	0	precuneus	0	1	0.287947	lower
283	structural connectivity	Receptors	CB1	mis	0.233161	0.289073	-0.229016	29999	(0.9, 3, 1)	0	0	precuneus	0	0	0.287947	lower
284	structural connectivity	Receptors	DAT	mis	0.230639	0.166863	-0.420599	29999	(0.01, 3, 1)	0	0	precuneus	0	0	0.287947	lower
285	structural connectivity	Receptors	MOR	mis	0.212539	0.26694	-0.286336	29999	(0.9, 3, 1)	0	0	precuneus	0	0	0.287947	lower
286	structural connectivity	Celltype	Micro	mis	0.209945	0.178023	-0.562682	29999	(0.01, 3, 1)	1	0	precuneus	0	0	0.287947	lower
287	structural connectivity	Receptors	NMDA	clear	0.205395	0.258982	-0.536634	29999	(0.1, 3, 1)	1	0	precuneus	0	0	0.287947	lower
288	structural connectivity	Celltype	Neuro-In	mis	0.201645	0.307412	-1.59729	5500	(0.7, 1.9, 0.1)	1	0	precuneus	0	0	0.287947	lower
289	structural connectivity	Receptors	M1	spread	0.193412	0.206231	-0.379486	29999	(0.9, 3, 1)	0	0	precuneus	0	1	0.287947	lower
290	structural connectivity	Receptors	DAT	syn	0.191907	0.253012	-0.340213	1948	(0.5, 3, 1)	0	0	precuneus	0	0	0.287947	lower
291	structural connectivity	Receptors	5HTT	clear	0.190166	0.23239	-0.269814	235	(0.01, 3, 1)	0	0	precuneus	0	0	0.287947	lower
292	structural connectivity	Receptors	VAChT	syn	0.187906	0.265705	-1.06775	29999	(0.01, 3, 1)	0	0	precuneus	0	0	0.287947	lower
293	structural connectivity	Celltype	Micro	syn	0.183772	0.1519	-0.798424	786	(0.1, 3, 1)	0	0	precuneus	0	0	0.287947	lower
294	structural connectivity	Celltype	Neuro-In	clear	0.182405	0.243434	-0.446768	29999	(0.01, 3, 1)	0	0	precuneus	0	0	0.287947	lower
295	structural connectivity	Receptors	NMDA	syn	0.182179	0.246736	-1.04277	29999	(0.01, 3, 1)	0	0	precuneus	0	0	0.287947	lower
296	structural connectivity	AD-realted	Cluster7	mis	0.179552	0.210134	-0.926265	29999	(0.7, 3, 1)	0	0	precuneus	0	0	0.287947	lower
297	structural connectivity	AD-realted	Cluster2	mis	0.179552	0.210134	-0.926265	29999	(0.7, 3, 1)	0	0	precuneus	0	0	0.287947	lower
298	structural connectivity	AD-realted	Cluster6	mis	0.179552	0.210134	-0.926265	29999	(0.7, 3, 1)	0	0	precuneus	0	0	0.287947	lower
299	structural connectivity	AD-realted	Cluster3	syn	0.179552	0.210134	-0.926265	29999	(0.7, 3, 1)	1	0	precuneus	0	0	0.287947	lower
300	structural connectivity	AD-realted	Cluster2	spread	0.179552	0.210134	-0.926265	29999	(0.7, 3, 1)	0	0	precuneus	0	0	0.287947	lower
301	structural connectivity	AD-realted	Cluster2	clear	0.179552	0.210134	-0.926265	29999	(0.7, 3, 1)	0	0	precuneus	0	0	0.287947	lower
302	structural connectivity	AD-realted	Cluster3	spread	0.179552	0.210134	-0.926265	29999	(0.7, 3, 1)	0	0	precuneus	0	0	0.287947	lower
303	structural connectivity	AD-realted	Cluster2	syn	0.179552	0.210134	-0.926265	29999	(0.7, 3, 1)	1	0	precuneus	0	1	0.287947	lower
304	structural connectivity	AD-realted	Cluster3	mis	0.179552	0.210134	-0.926265	29999	(0.7, 3, 1)	0	0	precuneus	0	0	0.287947	lower
305	structural connectivity	AD-realted	Cluster3	clear	0.179552	0.210134	-0.926265	29999	(0.7, 3, 1)	0	0	precuneus	0	1	0.287947	lower
306	structural connectivity	AD-realted	Cluster4	clear	0.179552	0.210134	-0.926265	29999	(0.7, 3, 1)	0	0	precuneus	0	0	0.287947	lower
307	structural connectivity	AD-realted	Cluster4	spread	0.179552	0.210134	-0.926265	29999	(0.7, 3, 1)	0	0	precuneus	0	0	0.287947	lower
308	structural connectivity	AD-realted	Cluster4	mis	0.179552	0.210134	-0.926265	29999	(0.7, 3, 1)	0	0	precuneus	0	0	0.287947	lower
309	structural connectivity	AD-realted	Cluster1	syn	0.179552	0.210134	-0.926265	29999	(0.7, 3, 1)	1	0	precuneus	0	1	0.287947	lower
310	structural connectivity	AD-realted	Cluster4	syn	0.179552	0.210134	-0.926265	29999	(0.7, 3, 1)	1	0	precuneus	0	1	0.287947	lower
311	structural connectivity	AD-realted	Cluster7	clear	0.179552	0.210134	-0.926265	29999	(0.7, 3, 1)	0	0	precuneus	0	0	0.287947	lower
312	structural connectivity	AD-realted	Cluster1	spread	0.179552	0.210134	-0.926265	29999	(0.7, 3, 1)	0	0	precuneus	0	0	0.287947	lower
313	structural connectivity	AD-realted	Cluster5	clear	0.179552	0.210134	-0.926265	29999	(0.7, 3, 1)	0	0	precuneus	0	0	0.287947	lower
314	structural connectivity	AD-realted	Cluster1	mis	0.179552	0.210134	-0.926265	29999	(0.7, 3, 1)	0	0	precuneus	0	0	0.287947	lower
315	structural connectivity	AD-realted	Cluster5	mis	0.179552	0.210134	-0.926265	29999	(0.7, 3, 1)	0	0	precuneus	0	0	0.287947	lower
316	structural connectivity	AD-realted	Cluster6	syn	0.179552	0.210134	-0.926265	29999	(0.7, 3, 1)	1	0	precuneus	0	0	0.287947	lower
317	structural connectivity	AD-realted	Cluster1	clear	0.179552	0.210134	-0.926265	29999	(0.7, 3, 1)	0	0	precuneus	0	0	0.287947	lower
318	structural connectivity	AD-realted	Cluster5	spread	0.179552	0.210134	-0.926265	29999	(0.7, 3, 1)	0	0	precuneus	0	0	0.287947	lower
319	structural connectivity	AD-realted	Cluster5	syn	0.179552	0.210134	-0.926265	29999	(0.7, 3, 1)	1	0	precuneus	0	1	0.287947	lower
320	structural connectivity	AD-realted	Cluster6	spread	0.179552	0.210134	-0.926265	29999	(0.7, 3, 1)	0	0	precuneus	0	0	0.287947	lower
321	structural connectivity	AD-realted	Cluster6	clear	0.179552	0.210134	-0.926265	29999	(0.7, 3, 1)	0	0	precuneus	0	1	0.287947	lower
322	structural connectivity	AD-realted	Cluster7	spread	0.179552	0.210134	-0.926265	29999	(0.7, 3, 1)	0	0	precuneus	0	0	0.287947	lower
323	structural connectivity				0.179552	0.210134	-0.926265	29999	(0.7, 3, 1)	0	1	precuneus	0	0	0.287947	lower
324	structural connectivity	AD-realted	Cluster7	syn	0.179552	0.210134	-0.926265	29999	(0.7, 3, 1)	1	0	precuneus	0	1	0.287947	lower
325	structural connectivity	Celltype	Micro	spread	0.178382	0.220037	-0.443378	29999	(0.7, 3, 1)	0	0	precuneus	0	1	0.287947	lower
326	structural connectivity	Celltype	Neuro-Ex	syn	0.176077	0.355375	-2.47758	867	(0.5, 1.9, 0.1)	1	0	precuneus	0	0	0.287947	lower
327	structural connectivity	Celltype	Neuro-In	syn	0.175768	0.307182	-1.57398	656	(0.9, 0.9, 0.1)	0	0	precuneus	0	0	0.287947	lower
328	structural connectivity	Celltype	Neuro-Ex	mis	0.172551	0.354938	-2.34351	882	(0.9, 1.5, 0.1)	0	0	precuneus	0	0	0.287947	lower
329	structural connectivity	Celltype	Neuro-Ex	clear	0.171017	0.222271	-0.489151	29999	(0.01, 2.9, 1)	0	0	precuneus	0	0	0.287947	lower
330	structural connectivity	Receptors	5HT6	spread	0.169038	0.19773	-0.44624	29999	(0.9, 3, 1)	0	0	precuneus	0	1	0.287947	lower
331	structural connectivity	Receptors	mGluR5	syn	0.165643	0.277717	-1.22634	29999	(0.01, 3, 1)	0	0	precuneus	0	0	0.287947	lower
332	structural connectivity	Receptors	mGluR5	clear	0.152024	0.301392	-0.614939	29999	(0.01, 3, 1)	0	0	precuneus	0	0	0.287947	lower
333	structural connectivity	Receptors	D1	mis	0.146915	0.218977	-0.408508	29999	(0.1, 3, 1)	0	0	precuneus	0	0	0.287947	lower
334	structural connectivity	metabolism	cbv	spread	0.141572	0.205476	-0.53886	29999	(0.9, 2.9, 1)	1	0	precuneus	0	1	0.287947	lower
335	structural connectivity	metabolism	cbv	syn	0.140329	0.226902	-1.22466	7436	(0.01, 3, 1)	0	0	precuneus	0	0	0.287947	lower
336	structural connectivity	Receptors	M1	mis	0.136954	0.165721	-0.786264	29999	(0.01, 1.9, 1)	0	0	precuneus	0	0	0.287947	lower
337	structural connectivity	AD-realted	Abeta	clear	0.116683	0.377625	-2.6642	656	(0.9, 0.1, 0.1)	0	0	precuneus	0	0	0.287947	lower
338	structural connectivity	Celltype	Neuro-Ex	spread	0.106765	0.225163	-1.11888	703	(0.5, 3, 1)	0	0	precuneus	0	1	0.287947	lower
339	structural connectivity	Celltype	Neuro-In	spread	0.0977528	0.236122	-1.05514	683	(0.5, 3, 1)	0	0	precuneus	0	1	0.287947	lower
340	structural connectivity	Receptors	D2	clear	0.0944594	0.36711	-2.97352	7200	(0.01, 1.5, 0.1)	0	0	precuneus	0	0	0.287947	lower
341	structural connectivity	Cortical expansion	scalingnih	clear	0.0940997	0.376109	-2.92853	245	(0.01, 1.5, 0.7)	0	0	precuneus	0	0	0.287947	lower
342	structural connectivity	metabolism	cbv	clear	0.0878867	0.331561	-0.551425	29999	(0.01, 3, 1)	0	0	precuneus	0	0	0.287947	lower
343	structural connectivity	Receptors	GABAa	spread	0.0753288	0.197963	-0.773357	29999	(0.9, 3, 1)	0	0	precuneus	0	0	0.287947	lower
344	structural connectivity	metabolism	cbv	mis	0.0598047	0.25176	-0.508179	29999	(0.01, 3, 1)	0	0	precuneus	0	0	0.287947	lower
345	structural connectivity	Receptors	NMDA	spread	0.0383655	0.195827	-1.07299	496	(0.5, 3, 1)	0	0	precuneus	0	1	0.287947	lower
346	structural connectivity	Receptors	D1	clear	0.0329977	0.29651	-0.754338	29999	(0.01, 3, 1)	0	0	precuneus	0	0	0.287947	lower
347	structural connectivity	Receptors	5HT4	clear	0.0313554	0.413965	-1.71386	0	(0.9, 0.1, 1)	0	0	precuneus	0	0	0.287947	lower
348	structural connectivity	Receptors	DAT	clear	0.0313548	0.414101	-1.70598	0	(0.9, 0.1, 0.1)	0	0	precuneus	0	0	0.287947	lower
349	structural connectivity	Celltype	Astro	clear	0.0313538	0.414254	-1.69722	0	(0.9, 0.1, 0.1)	0	0	precuneus	0	0	0.287947	lower
350	structural connectivity	Celltype	Oligo	mis	0.0313536	0.412868	-1.78162	0	(0.01, 3, 1)	0	0	precuneus	0	0	0.287947	lower
351	structural connectivity	Cortical expansion	scaling	clear	0.0313502	0.412558	-1.80222	0	(0.7, 0.1, 0.1)	0	0	precuneus	0	0	0.287947	lower
352	structural connectivity	metabolism	cbf	mis	0.0313489	0.414789	-1.66762	0	(0.01, 3, 1)	0	0	precuneus	0	0	0.287947	lower
353	structural connectivity	Receptors	NMDA	mis	0.0313485	0.414818	-1.66602	0	(0.01, 3, 1)	0	0	precuneus	0	0	0.287947	lower
354	structural connectivity	Microstructure	thickness	clear	0.0313485	0.412434	-1.81072	0	(0.9, 0.1, 0.1)	0	0	precuneus	0	0	0.287947	lower
355	structural connectivity	Receptors	NET	mis	0.0313481	0.414856	-1.66399	0	(0.01, 3, 1)	0	0	precuneus	0	0	0.287947	lower
356	structural connectivity	Cortical expansion	evoexp	clear	0.031348	0.414868	-1.66338	0	(0.9, 0.1, 1)	0	0	precuneus	0	0	0.287947	lower
357	structural connectivity	Microstructure	myelinmap	mis	0.0313472	0.414927	-1.66022	0	(0.01, 3, 1)	0	0	precuneus	0	0	0.287947	lower
358	structural connectivity	Receptors	5HT1b	mis	0.0313468	0.414963	-1.65827	0	(0.01, 3, 1)	0	0	precuneus	0	0	0.287947	lower
359	structural connectivity	Receptors	H3	mis	0.0313464	0.41499	-1.65688	0	(0.01, 3, 1)	0	0	precuneus	0	0	0.287947	lower
360	structural connectivity	metabolism	cmr02	mis	0.031345	0.415096	-1.65127	0	(0.01, 0.1, 1)	0	0	precuneus	0	0	0.287947	lower
361	structural connectivity	metabolism	cmrglc	mis	0.031345	0.415097	-1.6512	0	(0.01, 0.1, 1)	0	0	precuneus	0	0	0.287947	lower
362	structural connectivity	AD-realted	APOE	mis	0.031345	0.4151	-1.65104	0	(0.01, 0.1, 1)	0	0	precuneus	0	0	0.287947	lower
363	structural connectivity	Receptors	5HT6	mis	0.031345	0.415101	-1.651	0	(0.01, 0.1, 1)	0	0	precuneus	0	0	0.287947	lower
364	structural connectivity	Celltype	Oligo	spread	0.031345	0.415102	-1.65097	0	(0.01, 0.1, 1)	0	0	precuneus	0	0	0.287947	lower
365	structural connectivity	Microstructure	genepc1	spread	0.031345	0.415102	-1.65097	0	(0.01, 0.1, 1)	0	0	precuneus	0	1	0.287947	lower
366	structural connectivity	Receptors	NET	spread	0.031345	0.415102	-1.65097	0	(0.01, 0.1, 1)	0	0	precuneus	0	0	0.287947	lower
367	structural connectivity	Celltype	Endo	spread	0.031345	0.415102	-1.65097	0	(0.01, 0.1, 1)	0	0	precuneus	0	0	0.287947	lower
368	structural connectivity	AD-realted	APOE	spread	0.031345	0.415102	-1.65097	0	(0.01, 0.1, 1)	0	0	precuneus	0	0	0.287947	lower
369	structural connectivity	Receptors	A4B2	spread	0.031345	0.415102	-1.65097	0	(0.01, 0.1, 1)	0	0	precuneus	0	0	0.287947	lower
370	structural connectivity	Receptors	H3	spread	0.031345	0.415102	-1.65097	0	(0.01, 0.1, 1)	0	0	precuneus	0	1	0.287947	lower
371	structural connectivity	metabolism	cbf	spread	0.031345	0.415102	-1.65097	0	(0.01, 0.1, 1)	0	0	precuneus	0	0	0.287947	lower
372	structural connectivity	Receptors	5HT1b	spread	0.031345	0.415102	-1.65097	0	(0.01, 0.1, 1)	0	0	precuneus	0	0	0.287947	lower
373	structural connectivity	metabolism	cmr02	spread	0.031345	0.415102	-1.65097	0	(0.01, 0.1, 1)	0	0	precuneus	0	0	0.287947	lower
374	structural connectivity	Receptors	5HTT	spread	0.031345	0.415102	-1.65097	0	(0.01, 0.1, 1)	0	0	precuneus	0	0	0.287947	lower
375	structural connectivity	metabolism	cmrglc	spread	0.031345	0.415102	-1.65097	0	(0.01, 0.1, 1)	0	0	precuneus	0	0	0.287947	lower
376	structural connectivity	Receptors	VAChT	spread	0.031345	0.415102	-1.65097	0	(0.01, 0.1, 1)	0	0	precuneus	0	0	0.287947	lower
377	structural connectivity	Microstructure	genepc1	mis	0.0313449	0.415102	-1.65096	0	(0.01, 0.1, 1)	0	0	precuneus	0	0	0.287947	lower
378	structural connectivity	Receptors	VAChT	mis	0.0313449	0.415103	-1.6509	0	(0.01, 0.1, 1)	0	0	precuneus	0	0	0.287947	lower
379	structural connectivity	Receptors	5HTT	mis	0.0313448	0.41511	-1.65054	0	(0.01, 0.1, 1)	0	0	precuneus	0	0	0.287947	lower
380	structural connectivity	Receptors	A4B2	mis	0.0313447	0.415121	-1.64997	0	(0.01, 0.1, 1)	0	0	precuneus	0	0	0.287947	lower
381	structural connectivity	Receptors	mGluR5	mis	0.0313445	0.415135	-1.64925	0	(0.01, 0.1, 1)	0	0	precuneus	0	0	0.287947	lower
382	structural connectivity	Celltype	Endo	mis	0.0313444	0.415141	-1.64891	0	(0.01, 0.1, 1)	0	0	precuneus	0	0	0.287947	lower
383	structural connectivity	Cortical expansion	devexp	clear	0.0313444	0.415143	-1.64883	0	(0.01, 0.1, 1)	0	0	precuneus	0	0	0.287947	lower
384	structural connectivity	Receptors	GABAa	mis	0.0313443	0.415146	-1.64865	0	(0.01, 0.1, 1)	0	0	precuneus	0	0	0.287947	lower
385	structural connectivity	Cortical expansion	scalinghcp	clear	0.0313437	0.412154	-1.83026	0	(0.7, 0.1, 0.1)	0	0	precuneus	0	0	0.287947	lower
386	structural connectivity	Receptors	MOR	clear	0.0313426	0.415268	-1.64232	0	(0.01, 3, 1)	0	0	precuneus	0	0	0.287947	lower
387	structural connectivity	Microstructure	myelinmap	spread	0.0313412	0.415359	-1.63763	0	(0.5, 3, 1)	0	0	precuneus	0	1	0.287947	lower
388	structural connectivity	AD-realted	MAPT	clear	0.0313371	0.415615	-1.62465	0	(0.01, 3, 1)	0	0	precuneus	0	0	0.287947	lower
389	structural connectivity	Receptors	D1	syn	0.0313367	0.411842	-1.85286	0	(0.9, 0.1, 0.1)	0	0	precuneus	0	0	0.287947	lower
390	structural connectivity	Celltype	Micro	clear	0.0313353	0.415719	-1.61945	0	(0.01, 3, 1)	0	0	precuneus	0	0	0.287947	lower
391	structural connectivity	Receptors	5HT1a	clear	0.0313324	0.415865	-1.6122	0	(0.01, 3, 1)	0	0	precuneus	0	0	0.287947	lower
392	structural connectivity	Cortical expansion	scalingpnc	clear	0.0313238	0.411414	-1.88536	0	(0.9, 0.1, 0.1)	0	0	precuneus	0	0	0.287947	lower
393	structural connectivity	Receptors	CB1	clear	0.0312813	0.410508	-1.9609	0	(0.9, 0.1, 0.1)	0	0	precuneus	0	0	0.287947	lower
394	structural connectivity	Celltype	OPC	clear	0.0312643	0.410249	-1.98452	0	(0.9, 0.1, 0.1)	0	0	precuneus	0	0	0.287947	lower
1	functional connectivity	metabolism	cbf	clear	0.829574	0.0837595	0.670772	109	(0.3, 2.5, 0.5)	1	0	entorhinal	1	1	0.419543	higher
2	functional connectivity	metabolism	cbf	clear	0.818221	0.118535	0.613854	143	(0.01, 3, 0.3)	1	0	precuneus	0	1	0.201823	higher
3	functional connectivity	Receptors	D2	syn	0.785488	0.103938	0.530472	97	(0.5, 3, 0.7)	1	0	entorhinal	1	1	0.419543	higher
4	functional connectivity	Microstructure	thickness	syn	0.778162	0.117869	0.578469	109	(0.5, 3, 0.3)	1	0	entorhinal	1	1	0.419543	higher
5	functional connectivity	AD-realted	MAPT	mis	0.773383	0.0904165	0.596843	1066	(0.9, 1.5, 0.1)	1	0	entorhinal	1	1	0.419543	higher
6	functional connectivity	Receptors	D2	mis	0.772707	0.123582	0.583447	198	(0.9, 2.5, 1)	0	0	entorhinal	1	0	0.419543	higher
7	functional connectivity	metabolism	cmr02	clear	0.758463	0.131772	0.386234	75	(0.01, 1.9, 1)	1	0	entorhinal	1	1	0.419543	higher
8	functional connectivity	AD-realted	APOE	clear	0.749248	0.108903	0.491085	81	(0.3, 3, 1)	1	0	entorhinal	1	1	0.419543	higher
9	functional connectivity	Receptors	D2	spread	0.746601	0.0935526	0.525753	475	(0.9, 0.9, 1)	0	0	entorhinal	1	0	0.419543	higher
10	functional connectivity	Receptors	5HT1a	mis	0.74355	0.0707307	0.547833	771	(0.7, 3, 0.1)	1	0	entorhinal	1	1	0.419543	higher
11	functional connectivity	Microstructure	thickness	mis	0.739877	0.144926	0.443878	134	(0.7, 2, 1)	0	0	entorhinal	1	0	0.419543	higher
12	functional connectivity	AD-realted	MAPT	mis	0.739143	0.106788	0.542871	216	(0.9, 3, 0.3)	1	0	precuneus	0	1	0.201823	higher
13	functional connectivity	Receptors	D2	syn	0.735815	0.112974	0.502336	108	(0.5, 3, 0.5)	1	0	precuneus	0	1	0.201823	higher
14	functional connectivity	Receptors	5HT1a	spread	0.735501	0.0796295	0.509911	232	(0.9, 1.9, 1)	0	0	entorhinal	1	0	0.419543	higher
15	functional connectivity	Receptors	5HT1a	syn	0.728957	0.0983761	0.392351	134	(0.5, 3, 0.3)	0	0	entorhinal	1	0	0.419543	higher
16	functional connectivity	AD-realted	Abeta	spread	0.727206	0.0915653	0.481465	4260	(0.3, 0.5, 0.1)	1	0	entorhinal	1	1	0.419543	higher
17	functional connectivity	AD-realted	MAPT	syn	0.72629	0.0727701	0.49105	340	(0.7, 1.5, 0.1)	0	0	entorhinal	1	0	0.419543	higher
18	functional connectivity	AD-realted	MAPT	syn	0.724111	0.104222	0.507383	230	(0.7, 2, 0.1)	0	0	precuneus	0	0	0.201823	higher
19	functional connectivity	Receptors	5HT1a	mis	0.715784	0.074668	0.500208	1628	(0.7, 3, 0.1)	1	0	precuneus	0	1	0.201823	higher
20	functional connectivity	Receptors	D2	mis	0.715166	0.124335	0.510657	29999	(0.9, 1.5, 1)	0	0	precuneus	0	0	0.201823	higher
21	functional connectivity	Microstructure	thickness	spread	0.709876	0.0957939	0.469148	210	(0.9, 2, 1)	0	0	entorhinal	1	0	0.419543	higher
22	functional connectivity	Receptors	5HT4	spread	0.706801	0.0876415	0.443208	219	(0.9, 2, 1)	1	0	entorhinal	1	1	0.419543	higher
23	functional connectivity	Receptors	5HT4	syn	0.703393	0.0958438	0.481305	155	(0.7, 3, 0.1)	0	0	entorhinal	1	0	0.419543	higher
24	functional connectivity	Receptors	5HT4	mis	0.698332	0.103741	0.477812	228	(0.9, 3, 0.3)	0	0	entorhinal	1	0	0.419543	higher
25	functional connectivity	Receptors	5HT6	spread	0.697635	0.130889	0.240501	245	(0.9, 1, 1)	1	0	entorhinal	1	1	0.419543	higher
26	functional connectivity	metabolism	cmrglc	clear	0.696257	0.107011	0.376424	78	(0.3, 3, 0.9)	1	0	entorhinal	1	1	0.419543	higher
27	functional connectivity	Receptors	D1	spread	0.694482	0.105184	0.418021	206	(0.9, 2, 1)	1	0	entorhinal	1	1	0.419543	higher
28	functional connectivity	Cortical expansion	scalinghcp	syn	0.68713	0.149972	0.38491	79	(0.9, 3, 1)	1	0	entorhinal	1	1	0.419543	higher
29	functional connectivity	Receptors	5HT2a	spread	0.684022	0.131567	0.354278	10869	(0.7, 0.1, 0.1)	1	0	entorhinal	1	1	0.419543	higher
30	functional connectivity	Microstructure	genepc1	clear	0.681661	0.201117	0.235667	40	(0.01, 3, 1)	1	0	entorhinal	1	1	0.419543	higher
31	functional connectivity	Receptors	CB1	spread	0.680895	0.10237	0.387913	202	(0.9, 2, 1)	1	0	entorhinal	1	1	0.419543	higher
32	functional connectivity	Cortical expansion	devexp	mis	0.675146	0.207093	0.252214	98	(0.9, 3, 0.1)	1	0	entorhinal	1	1	0.419543	higher
33	functional connectivity	Cortical expansion	devexp	syn	0.673982	0.206382	0.284649	56	(0.9, 3, 0.3)	0	0	entorhinal	1	0	0.419543	higher
34	functional connectivity	Receptors	MOR	spread	0.6692	0.0926711	0.390033	222	(0.9, 2, 0.7)	1	0	entorhinal	1	1	0.419543	higher
35	functional connectivity	AD-realted	MAPT	spread	0.66759	0.0903835	0.404591	477	(0.9, 3, 0.1)	0	0	entorhinal	1	0	0.419543	higher
36	functional connectivity	Receptors	D2	spread	0.665126	0.110186	0.437148	483	(0.7, 0.9, 0.7)	0	0	precuneus	0	0	0.201823	higher
37	functional connectivity	metabolism	cmr02	clear	0.662906	0.163856	0.399022	29999	(0.5, 3, 1)	1	0	precuneus	0	1	0.201823	higher
38	functional connectivity	Receptors	DAT	spread	0.659979	0.11613	0.307428	445	(0.9, 1.5, 0.1)	1	0	entorhinal	1	1	0.419543	higher
39	functional connectivity	Microstructure	myelinmap	clear	0.654937	0.163423	0.304791	42	(0.1, 3, 1)	1	0	entorhinal	1	1	0.419543	higher
40	functional connectivity	Cortical expansion	scalinghcp	mis	0.649217	0.171157	0.300366	197	(0.9, 3, 0.1)	0	0	entorhinal	1	0	0.419543	higher
41	functional connectivity	AD-realted	Abeta	spread	0.646745	0.0863735	0.377052	29999	(0.9, 3, 1)	1	0	precuneus	0	1	0.201823	higher
42	functional connectivity	Receptors	5HT4	mis	0.646131	0.110404	0.380533	360	(0.7, 3, 0.1)	1	0	precuneus	0	0	0.201823	higher
43	functional connectivity	Receptors	5HT1a	syn	0.643202	0.104566	0.296845	139	(0.5, 3, 0.3)	0	0	precuneus	0	0	0.201823	higher
44	functional connectivity	Cortical expansion	scalingnih	syn	0.6385	0.141873	0.356232	101	(0.9, 3, 0.5)	1	0	entorhinal	1	1	0.419543	higher
45	functional connectivity	Microstructure	thickness	syn	0.638316	0.113745	0.373064	119	(0.7, 3, 0.3)	1	0	precuneus	0	1	0.201823	higher
46	functional connectivity	AD-realted	APOE	clear	0.637547	0.137629	0.369986	29999	(0.3, 3, 1)	1	0	precuneus	0	1	0.201823	higher
47	functional connectivity	Cortical expansion	scaling	syn	0.632825	0.147797	0.358428	113	(0.9, 3, 0.1)	1	0	entorhinal	1	1	0.419543	higher
48	functional connectivity	Receptors	mGluR5	spread	0.631853	0.112174	0.281946	225	(0.9, 2, 0.5)	1	0	entorhinal	1	1	0.419543	higher
49	functional connectivity	Receptors	5HT1a	spread	0.630811	0.0972012	0.368314	308	(0.5, 1, 1)	0	0	precuneus	0	0	0.201823	higher
50	functional connectivity	Receptors	5HT4	syn	0.629633	0.127049	0.362682	264	(0.9, 1.5, 0.1)	0	0	precuneus	0	0	0.201823	higher
51	functional connectivity	Receptors	GABAa	spread	0.627729	0.148413	0.174958	2811	(0.9, 0.1, 1)	1	0	entorhinal	1	1	0.419543	higher
52	functional connectivity	Cortical expansion	scaling	spread	0.624745	0.11985	0.335767	229	(0.9, 2, 0.3)	0	0	entorhinal	1	0	0.419543	higher
53	functional connectivity	Receptors	NET	spread	0.62366	0.165736	0.145513	3017	(0.9, 0.1, 1)	1	0	entorhinal	1	1	0.419543	higher
54	functional connectivity	Microstructure	thickness	mis	0.623479	0.115718	0.374636	29999	(0.9, 1.5, 1)	0	0	precuneus	0	0	0.201823	higher
55	functional connectivity	Cortical expansion	evoexp	spread	0.623182	0.103663	0.307152	242	(0.9, 2, 0.3)	1	0	entorhinal	1	1	0.419543	higher
56	functional connectivity	Cortical expansion	scalingnih	spread	0.622735	0.121716	0.33569	243	(0.9, 1.9, 0.3)	0	0	entorhinal	1	0	0.419543	higher
57	functional connectivity	Cortical expansion	scalinghcp	spread	0.62052	0.126983	0.319677	226	(0.9, 2, 0.3)	0	0	entorhinal	1	0	0.419543	higher
58	functional connectivity	Celltype	Astro	spread	0.617694	0.0987025	0.257163	235	(0.9, 1.9, 0.5)	1	0	entorhinal	1	1	0.419543	higher
59	functional connectivity	Receptors	NMDA	spread	0.615633	0.145006	0.227142	407	(0.9, 1.5, 0.1)	1	0	entorhinal	1	1	0.419543	higher
60	functional connectivity	Receptors	5HT1b	clear	0.614989	0.114673	0.22237	236	(0.1, 3, 0.1)	1	0	entorhinal	1	1	0.419543	higher
61	functional connectivity	Cortical expansion	scalingpnc	spread	0.614845	0.115443	0.300322	231	(0.9, 2, 0.3)	1	0	entorhinal	1	1	0.419543	higher
62	functional connectivity	Receptors	CB1	syn	0.614741	0.127386	0.234598	70	(0.7, 1.9, 1)	0	0	entorhinal	1	0	0.419543	higher
63	functional connectivity	Receptors	M1	spread	0.613287	0.133681	0.208113	236	(0.9, 1.9, 0.3)	1	0	entorhinal	1	1	0.419543	higher
64	functional connectivity	Receptors	VAChT	clear	0.611377	0.184056	0.13144	123	(0.7, 0.5, 0.3)	1	0	entorhinal	1	1	0.419543	higher
65	functional connectivity	Cortical expansion	devexp	spread	0.608911	0.115037	0.269492	237	(0.9, 2, 0.3)	0	0	entorhinal	1	0	0.419543	higher
66	functional connectivity	Receptors	CB1	mis	0.607901	0.140936	0.129958	64	(0.5, 3, 1)	0	0	entorhinal	1	0	0.419543	higher
67	functional connectivity	Celltype	OPC	spread	0.602996	0.0955168	0.275134	262	(0.9, 1.9, 0.3)	1	0	entorhinal	1	1	0.419543	higher
68	functional connectivity	Receptors	5HT4	spread	0.601872	0.0947506	0.290527	635	(0.01, 0.9, 1)	0	0	precuneus	0	1	0.201823	higher
69	functional connectivity	Receptors	H3	spread	0.595958	0.120781	0.225174	258	(0.9, 1.9, 0.3)	1	0	entorhinal	1	1	0.419543	higher
70	functional connectivity	Receptors	A4B2	spread	0.59522	0.159796	-0.104167	29999	(0.9, 0.1, 1)	1	0	entorhinal	1	1	0.419543	higher
71	functional connectivity	Cortical expansion	evoexp	syn	0.593027	0.172537	0.246923	88	(0.9, 1.5, 1)	0	0	entorhinal	1	0	0.419543	higher
72	functional connectivity	Receptors	5HT1b	clear	0.591841	0.105027	0.268877	228	(0.3, 3, 0.1)	1	0	precuneus	0	1	0.201823	higher
73	functional connectivity	Celltype	Endo	clear	0.589233	0.256519	-0.198881	26	(0.01, 3, 1)	1	0	entorhinal	1	1	0.419543	higher
74	functional connectivity	Receptors	NET	clear	0.587604	0.0957955	0.208728	101	(0.3, 3, 0.5)	0	0	entorhinal	1	0	0.419543	higher
75	functional connectivity	Receptors	5HT2a	mis	0.586559	0.200305	0.18574	92	(0.9, 3, 0.1)	0	0	entorhinal	1	0	0.419543	higher
76	functional connectivity	Cortical expansion	evoexp	mis	0.585837	0.194165	0.181393	126	(0.9, 2.5, 0.1)	0	0	entorhinal	1	0	0.419543	higher
77	functional connectivity	AD-realted	Cluster4	syn	0.584893	0.113674	0.157355	214	(0.9, 2, 0.3)	1	0	entorhinal	1	1	0.419543	higher
78	functional connectivity	AD-realted	Cluster4	mis	0.584893	0.113674	0.157355	214	(0.9, 2, 0.3)	0	0	entorhinal	1	0	0.419543	higher
79	functional connectivity	AD-realted	Cluster4	spread	0.584893	0.113674	0.157355	214	(0.9, 2, 0.3)	0	0	entorhinal	1	0	0.419543	higher
80	functional connectivity	AD-realted	Cluster5	mis	0.584893	0.113674	0.157355	214	(0.9, 2, 0.3)	0	0	entorhinal	1	0	0.419543	higher
81	functional connectivity	AD-realted	Cluster3	syn	0.584893	0.113674	0.157355	214	(0.9, 2, 0.3)	1	0	entorhinal	1	1	0.419543	higher
82	functional connectivity	AD-realted	Cluster7	mis	0.584893	0.113674	0.157355	214	(0.9, 2, 0.3)	0	0	entorhinal	1	0	0.419543	higher
83	functional connectivity	AD-realted	Cluster3	clear	0.584893	0.113674	0.157355	214	(0.9, 2, 0.3)	0	0	entorhinal	1	0	0.419543	higher
84	functional connectivity	AD-realted	Cluster3	spread	0.584893	0.113674	0.157355	214	(0.9, 2, 0.3)	0	0	entorhinal	1	0	0.419543	higher
85	functional connectivity	AD-realted	Cluster3	mis	0.584893	0.113674	0.157355	214	(0.9, 2, 0.3)	0	0	entorhinal	1	0	0.419543	higher
86	functional connectivity	AD-realted	Cluster7	spread	0.584893	0.113674	0.157355	214	(0.9, 2, 0.3)	0	0	entorhinal	1	0	0.419543	higher
87	functional connectivity	AD-realted	Cluster5	clear	0.584893	0.113674	0.157355	214	(0.9, 2, 0.3)	0	0	entorhinal	1	0	0.419543	higher
88	functional connectivity	AD-realted	Cluster2	syn	0.584893	0.113674	0.157355	214	(0.9, 2, 0.3)	1	0	entorhinal	1	1	0.419543	higher
89	functional connectivity	AD-realted	Cluster4	clear	0.584893	0.113674	0.157355	214	(0.9, 2, 0.3)	0	0	entorhinal	1	0	0.419543	higher
90	functional connectivity	AD-realted	Cluster2	clear	0.584893	0.113674	0.157355	214	(0.9, 2, 0.3)	0	0	entorhinal	1	0	0.419543	higher
91	functional connectivity	AD-realted	Cluster6	syn	0.584893	0.113674	0.157355	214	(0.9, 2, 0.3)	1	0	entorhinal	1	1	0.419543	higher
92	functional connectivity	AD-realted	Cluster7	syn	0.584893	0.113674	0.157355	214	(0.9, 2, 0.3)	1	0	entorhinal	1	1	0.419543	higher
93	functional connectivity	AD-realted	Cluster1	clear	0.584893	0.113674	0.157355	214	(0.9, 2, 0.3)	0	0	entorhinal	1	0	0.419543	higher
94	functional connectivity	AD-realted	Cluster2	spread	0.584893	0.113674	0.157355	214	(0.9, 2, 0.3)	0	0	entorhinal	1	0	0.419543	higher
95	functional connectivity	AD-realted	Cluster1	mis	0.584893	0.113674	0.157355	214	(0.9, 2, 0.3)	0	0	entorhinal	1	0	0.419543	higher
96	functional connectivity	AD-realted	Cluster1	spread	0.584893	0.113674	0.157355	214	(0.9, 2, 0.3)	0	0	entorhinal	1	0	0.419543	higher
97	functional connectivity	AD-realted	Cluster6	mis	0.584893	0.113674	0.157355	214	(0.9, 2, 0.3)	0	0	entorhinal	1	0	0.419543	higher
98	functional connectivity	AD-realted	Cluster6	spread	0.584893	0.113674	0.157355	214	(0.9, 2, 0.3)	0	0	entorhinal	1	0	0.419543	higher
99	functional connectivity	AD-realted	Cluster6	clear	0.584893	0.113674	0.157355	214	(0.9, 2, 0.3)	0	0	entorhinal	1	0	0.419543	higher
100	functional connectivity	AD-realted	Cluster1	syn	0.584893	0.113674	0.157355	214	(0.9, 2, 0.3)	1	0	entorhinal	1	1	0.419543	higher
101	functional connectivity	AD-realted	Cluster5	syn	0.584893	0.113674	0.157355	214	(0.9, 2, 0.3)	1	0	entorhinal	1	1	0.419543	higher
102	functional connectivity				0.584893	0.113674	0.157355	214	(0.9, 2, 0.3)	0	1	entorhinal	1	0	0.419543	higher
103	functional connectivity	AD-realted	Cluster5	spread	0.584893	0.113674	0.157355	214	(0.9, 2, 0.3)	0	0	entorhinal	1	0	0.419543	higher
104	functional connectivity	AD-realted	Cluster7	clear	0.584893	0.113674	0.157355	214	(0.9, 2, 0.3)	0	0	entorhinal	1	0	0.419543	higher
105	functional connectivity	AD-realted	Cluster2	mis	0.584893	0.113674	0.157355	214	(0.9, 2, 0.3)	0	0	entorhinal	1	0	0.419543	higher
106	functional connectivity	Receptors	M1	mis	0.582308	0.220505	-0.113587	71	(0.7, 2.5, 1)	0	0	entorhinal	1	0	0.419543	higher
107	functional connectivity	metabolism	cbv	spread	0.58069	0.135311	0.220644	229	(0.9, 1.9, 0.3)	1	0	entorhinal	1	1	0.419543	higher
108	functional connectivity	Celltype	Micro	spread	0.579077	0.10496	0.208102	236	(0.9, 2, 0.3)	1	0	entorhinal	1	1	0.419543	higher
109	functional connectivity	Celltype	Neuro-In	spread	0.572514	0.141877	0.145062	292	(0.9, 1.9, 0.1)	1	0	entorhinal	1	1	0.419543	higher
110	functional connectivity	Receptors	M1	syn	0.568797	0.199395	0.0637924	86	(0.7, 1.9, 0.7)	0	0	entorhinal	1	0	0.419543	higher
111	functional connectivity	Receptors	VAChT	spread	0.56875	0.115164	0.109185	324	(0.9, 1.9, 0.1)	0	0	entorhinal	1	0	0.419543	higher
112	functional connectivity	Receptors	5HT2a	syn	0.568141	0.202205	0.136115	106	(0.9, 3, 0.1)	0	0	entorhinal	1	0	0.419543	higher
113	functional connectivity	Celltype	Neuro-Ex	spread	0.564167	0.141484	0.132044	291	(0.9, 1.9, 0.1)	1	0	entorhinal	1	1	0.419543	higher
114	functional connectivity	Receptors	MOR	syn	0.556603	0.143006	0.0926191	61	(0.5, 2, 1)	0	0	entorhinal	1	0	0.419543	higher
115	functional connectivity	Cortical expansion	scalingnih	mis	0.556359	0.146862	0.203987	266	(0.9, 3, 0.1)	0	0	entorhinal	1	0	0.419543	higher
116	functional connectivity	Receptors	A4B2	clear	0.549392	0.154242	-0.0200577	47	(0.9, 3, 1)	0	0	entorhinal	1	0	0.419543	higher
117	functional connectivity	AD-realted	Abeta	mis	0.549342	0.10361	0.0298087	1358	(0.01, 1.5, 0.1)	0	0	entorhinal	1	0	0.419543	higher
118	functional connectivity	Receptors	DAT	syn	0.547864	0.14629	0.0345323	47	(0.1, 2.9, 0.9)	0	0	entorhinal	1	0	0.419543	higher
119	functional connectivity	Receptors	5HTT	spread	0.547669	0.133541	0.0504007	440	(0.9, 1.5, 0.1)	1	0	entorhinal	1	1	0.419543	higher
120	functional connectivity	Celltype	Astro	syn	0.54566	0.168166	-0.157796	44	(0.1, 3, 1)	0	0	entorhinal	1	0	0.419543	higher
121	functional connectivity	Cortical expansion	scaling	mis	0.542286	0.159245	0.185309	232	(0.9, 3, 0.1)	0	0	entorhinal	1	0	0.419543	higher
122	functional connectivity	Receptors	GABAa	clear	0.541837	0.171309	-0.0832767	49	(0.9, 3, 1)	0	0	entorhinal	1	0	0.419543	higher
123	functional connectivity	Celltype	OPC	syn	0.541221	0.167035	-0.187029	51	(0.3, 2.5, 1)	0	0	entorhinal	1	0	0.419543	higher
124	functional connectivity	AD-realted	MAPT	spread	0.538522	0.109779	0.189305	258	(0.01, 1, 1)	0	0	precuneus	0	0	0.201823	higher
125	functional connectivity	metabolism	cmrglc	clear	0.537124	0.135386	0.0422921	44	(0.01, 2.5, 1)	1	0	precuneus	0	1	0.201823	higher
126	functional connectivity	Receptors	NET	clear	0.536067	0.101679	0.132752	1539	(0.5, 0.9, 0.1)	1	0	precuneus	0	0	0.201823	higher
127	functional connectivity	AD-realted	Abeta	syn	0.533798	0.147989	0.129155	108	(0.7, 3, 0.5)	0	0	entorhinal	1	0	0.419543	higher
128	functional connectivity	Microstructure	myelinmap	spread	0.532467	0.136113	0.0413901	290	(0.9, 1.9, 0.1)	0	0	entorhinal	1	0	0.419543	higher
129	functional connectivity	Receptors	D1	syn	0.521053	0.176833	-0.11364	50	(0.3, 3, 1)	0	0	entorhinal	1	0	0.419543	higher
130	functional connectivity	Receptors	5HTT	syn	0.518989	0.157255	-0.158311	43	(0.01, 2.9, 1)	0	0	entorhinal	1	0	0.419543	higher
131	functional connectivity	Receptors	5HT1b	spread	0.513479	0.13631	0.0075076	302	(0.9, 1.9, 0.1)	0	0	entorhinal	1	0	0.419543	higher
132	functional connectivity	metabolism	cmr02	spread	0.512122	0.139852	0.0114603	291	(0.9, 1.9, 0.1)	0	0	entorhinal	1	0	0.419543	higher
133	functional connectivity	Celltype	OPC	mis	0.511996	0.208435	-0.18846	249	(0.3, 2.9, 0.1)	0	0	entorhinal	1	0	0.419543	higher
134	functional connectivity	Celltype	Astro	mis	0.510715	0.213954	-0.156185	232	(0.3, 2.9, 0.1)	0	0	entorhinal	1	0	0.419543	higher
135	functional connectivity	Celltype	Oligo	clear	0.506259	0.212653	-0.207078	40	(0.01, 1.5, 1)	1	0	entorhinal	1	1	0.419543	higher
136	functional connectivity	Microstructure	genepc1	spread	0.5032	0.144498	-0.0339226	274	(0.9, 2, 0.1)	0	0	entorhinal	1	0	0.419543	higher
137	functional connectivity	metabolism	cmrglc	spread	0.503063	0.144748	-0.0311789	276	(0.9, 2, 0.1)	0	0	entorhinal	1	0	0.419543	higher
138	functional connectivity	AD-realted	APOE	spread	0.502965	0.138349	-0.0367981	277	(0.9, 2, 0.1)	0	0	entorhinal	1	0	0.419543	higher
139	functional connectivity	Microstructure	thickness	spread	0.501717	0.102927	0.0166669	339	(0.9, 1.5, 1)	0	0	precuneus	0	0	0.201823	higher
140	functional connectivity	Celltype	Oligo	spread	0.498131	0.152753	-0.0195935	302	(0.9, 1.9, 0.1)	0	0	entorhinal	1	0	0.419543	higher
141	functional connectivity	Receptors	NMDA	syn	0.497322	0.172227	-0.243157	47	(0.3, 3, 1)	0	0	entorhinal	1	0	0.419543	higher
142	functional connectivity	metabolism	cbv	syn	0.495116	0.184335	-0.173815	41	(0.3, 3, 1)	0	0	entorhinal	1	0	0.419543	higher
143	functional connectivity	AD-realted	Abeta	mis	0.491662	0.12991	0.112006	296	(0.5, 3, 0.3)	0	0	precuneus	0	0	0.201823	higher
144	functional connectivity	Celltype	Endo	spread	0.49007	0.133683	-0.0298447	283	(0.9, 2, 0.1)	0	0	entorhinal	1	0	0.419543	higher
145	functional connectivity	metabolism	cbf	spread	0.483919	0.14923	-0.184784	216	(0.9, 2.5, 0.1)	0	0	entorhinal	1	0	0.419543	higher
146	functional connectivity	Cortical expansion	scalingnih	mis	0.483716	0.142525	0.129698	29999	(0.9, 1.5, 1)	1	0	precuneus	0	0	0.201823	higher
147	functional connectivity	Receptors	5HT6	mis	0.482244	0.230971	-0.0733344	59	(0.7, 3, 1)	0	0	entorhinal	1	0	0.419543	higher
148	functional connectivity	Cortical expansion	evoexp	mis	0.476093	0.192761	-0.0800473	110	(0.9, 3, 0.1)	1	0	precuneus	0	0	0.201823	higher
149	functional connectivity	Cortical expansion	scalingpnc	syn	0.47205	0.17673	0.0610526	105	(0.9, 3, 0.3)	0	0	entorhinal	1	0	0.419543	higher
150	functional connectivity	Celltype	Micro	syn	0.471434	0.177214	-0.262265	46	(0.3, 2.5, 1)	0	0	entorhinal	1	0	0.419543	higher
151	functional connectivity	Cortical expansion	evoexp	syn	0.470471	0.203405	-0.123265	105	(0.9, 1.9, 0.1)	0	0	precuneus	0	0	0.201823	higher
152	functional connectivity	Cortical expansion	scalingpnc	mis	0.465239	0.186556	-0.24636	102	(0.5, 1.5, 1)	0	0	entorhinal	1	0	0.419543	higher
153	functional connectivity	Celltype	Endo	syn	0.465189	0.177502	-0.341611	42	(0.01, 2.5, 1)	0	0	entorhinal	1	0	0.419543	higher
154	functional connectivity	Cortical expansion	scalinghcp	mis	0.463145	0.148467	0.116272	436	(0.9, 2.5, 0.1)	1	0	precuneus	0	0	0.201823	higher
155	functional connectivity	Celltype	Oligo	syn	0.462797	0.174223	-0.449567	56	(0.1, 1.9, 1)	0	0	entorhinal	1	0	0.419543	higher
156	functional connectivity	Cortical expansion	scalingnih	syn	0.461035	0.164907	0.0706038	730	(0.9, 0.9, 0.1)	0	0	precuneus	0	1	0.201823	higher
157	functional connectivity	Cortical expansion	scalinghcp	syn	0.460837	0.138303	0.0541886	304	(0.9, 1.5, 0.1)	0	0	precuneus	0	1	0.201823	higher
158	functional connectivity	Celltype	OPC	mis	0.460648	0.218895	-0.219673	100	(0.7, 2.9, 0.3)	1	0	precuneus	0	0	0.201823	higher
159	functional connectivity	Receptors	MOR	mis	0.45988	0.226245	-0.457546	65	(0.5, 3, 1)	0	0	entorhinal	1	0	0.419543	higher
160	functional connectivity	Cortical expansion	scaling	mis	0.458561	0.166303	0.140465	29999	(0.9, 1.5, 1)	1	0	precuneus	0	0	0.201823	higher
161	functional connectivity	Receptors	H3	clear	0.458475	0.152396	-0.11978	57	(0.9, 3, 0.5)	0	0	entorhinal	1	0	0.419543	higher
162	functional connectivity	Receptors	5HT2a	spread	0.453408	0.146975	0.0202221	29999	(0.9, 1.5, 0.5)	1	0	precuneus	0	1	0.201823	higher
163	functional connectivity	Celltype	OPC	syn	0.452323	0.2068	-0.255182	104	(0.7, 2, 0.3)	0	0	precuneus	0	0	0.201823	higher
164	functional connectivity	Celltype	Neuro-Ex	syn	0.452062	0.187084	-0.423448	49	(0.05, 1.9, 1)	0	0	entorhinal	1	0	0.419543	higher
165	functional connectivity	Receptors	A4B2	clear	0.446701	0.130686	-0.00530964	29999	(0.9, 0.5, 1)	1	0	precuneus	0	0	0.201823	higher
166	functional connectivity	Celltype	Neuro-In	syn	0.445807	0.188454	-0.45571	49	(0.01, 2, 1)	0	0	entorhinal	1	0	0.419543	higher
167	functional connectivity	Receptors	GABAa	clear	0.444387	0.118616	-0.0548272	90	(0.9, 3, 1)	1	0	precuneus	0	0	0.201823	higher
168	functional connectivity	Microstructure	genepc1	clear	0.440518	0.250533	0.0919789	29999	(0.5, 3, 1)	1	0	precuneus	0	1	0.201823	higher
169	functional connectivity	Cortical expansion	scaling	syn	0.438372	0.157911	0.0321291	291	(0.9, 1.5, 0.1)	0	0	precuneus	0	1	0.201823	higher
170	functional connectivity	Receptors	VAChT	clear	0.431641	0.18292	0.0814016	51	(0.7, 3, 0.7)	1	0	precuneus	0	1	0.201823	higher
171	functional connectivity	Receptors	5HT2a	mis	0.428051	0.213464	-0.294367	379	(0.9, 1.9, 0.1)	0	0	precuneus	0	0	0.201823	higher
172	functional connectivity	AD-realted	Abeta	syn	0.426246	0.132704	-0.172908	118	(0.7, 3, 0.3)	0	0	precuneus	0	0	0.201823	higher
173	functional connectivity	Cortical expansion	devexp	mis	0.425862	0.248123	-0.797199	2072	(0.9, 1, 1)	1	0	precuneus	0	1	0.201823	higher
174	functional connectivity	Receptors	D1	mis	0.425585	0.248759	-0.346155	58	(0.5, 2.9, 1)	0	0	entorhinal	1	0	0.419543	higher
175	functional connectivity	Microstructure	myelinmap	clear	0.425471	0.199916	-0.0438204	29999	(0.7, 3, 1)	1	0	precuneus	0	1	0.201823	higher
176	functional connectivity	Celltype	Micro	clear	0.422121	0.239252	-0.532009	30	(0.1, 3, 1)	0	0	entorhinal	1	0	0.419543	higher
177	functional connectivity	Receptors	CB1	spread	0.421608	0.115242	-0.194032	325	(0.9, 1.5, 1)	1	0	precuneus	0	1	0.201823	higher
178	functional connectivity	Celltype	Astro	mis	0.420933	0.233429	-0.326435	69	(0.9, 3, 1)	1	0	precuneus	0	0	0.201823	higher
179	functional connectivity	Receptors	5HT2a	syn	0.418239	0.207883	-0.449397	343	(0.9, 0.9, 1)	0	0	precuneus	0	0	0.201823	higher
180	functional connectivity	Celltype	Astro	syn	0.41656	0.22303	-0.396157	69	(0.7, 2.5, 0.7)	0	0	precuneus	0	0	0.201823	higher
181	functional connectivity	Receptors	GABAa	spread	0.411661	0.145564	-0.087179	29999	(0.9, 1.5, 1)	0	0	precuneus	0	1	0.201823	higher
182	functional connectivity	Receptors	MOR	spread	0.407881	0.116355	-0.206236	374	(0.9, 1.5, 0.5)	1	0	precuneus	0	1	0.201823	higher
183	functional connectivity	Receptors	NMDA	mis	0.405191	0.235597	-0.535978	57	(0.5, 3, 1)	0	0	entorhinal	1	0	0.419543	lower
184	functional connectivity	metabolism	cbv	mis	0.403478	0.256875	-0.490739	67	(0.7, 3, 0.7)	0	0	entorhinal	1	0	0.419543	lower
185	functional connectivity	Receptors	5HTT	clear	0.399073	0.208134	-0.0581874	61	(0.9, 3, 0.1)	0	0	entorhinal	1	0	0.419543	lower
186	functional connectivity	Celltype	Micro	mis	0.398149	0.194855	-0.582699	277	(0.1, 3, 0.1)	0	0	entorhinal	1	0	0.419543	lower
187	functional connectivity	Receptors	VAChT	syn	0.393563	0.211145	-0.922035	45	(0.05, 3, 1)	0	0	entorhinal	1	0	0.419543	lower
188	functional connectivity	Receptors	DAT	mis	0.389665	0.254888	-0.563541	59	(0.3, 3, 1)	0	0	entorhinal	1	0	0.419543	lower
189	functional connectivity	Receptors	mGluR5	mis	0.388764	0.204365	-0.713395	662	(0.01, 2, 0.1)	0	0	entorhinal	1	0	0.419543	lower
190	functional connectivity	Microstructure	myelinmap	syn	0.383754	0.23256	-0.482739	41	(0.5, 3, 1)	0	0	entorhinal	1	0	0.419543	lower
191	functional connectivity	Celltype	OPC	clear	0.383602	0.249332	-0.55406	52	(0.5, 1, 1)	0	0	entorhinal	1	0	0.419543	lower
192	functional connectivity	Celltype	Neuro-Ex	mis	0.382957	0.236749	-0.727592	306	(0.01, 2.5, 0.1)	0	0	entorhinal	1	0	0.419543	lower
193	functional connectivity	Receptors	NMDA	clear	0.382525	0.227916	-0.769011	215	(0.01, 1, 0.1)	0	0	entorhinal	1	0	0.419543	lower
194	functional connectivity	Celltype	Neuro-Ex	clear	0.379963	0.237512	-0.483284	41	(0.01, 2, 1)	0	0	entorhinal	1	0	0.419543	lower
195	functional connectivity	Cortical expansion	devexp	syn	0.377086	0.167392	-0.63126	29999	(0.9, 0.5, 1)	0	0	precuneus	0	0	0.201823	higher
196	functional connectivity	Celltype	Neuro-In	mis	0.372906	0.255169	-0.762326	235	(0.01, 2.9, 0.1)	0	0	entorhinal	1	0	0.419543	lower
197	functional connectivity	Cortical expansion	devexp	clear	0.370999	0.277657	-0.513489	26	(0.01, 3, 1)	0	0	entorhinal	1	0	0.419543	lower
198	functional connectivity	Receptors	5HT6	clear	0.370251	0.20239	-0.443058	46	(0.9, 3, 1)	0	0	entorhinal	1	0	0.419543	lower
199	functional connectivity	Celltype	Neuro-In	clear	0.369891	0.232191	-0.70681	393	(0.01, 0.9, 0.1)	0	0	entorhinal	1	0	0.419543	lower
200	functional connectivity	Celltype	Astro	clear	0.369638	0.267372	-0.572218	56	(0.01, 1.5, 0.5)	0	0	entorhinal	1	0	0.419543	lower
201	functional connectivity	Receptors	M1	clear	0.368008	0.232561	-0.270744	48	(0.9, 3, 1)	0	0	entorhinal	1	0	0.419543	lower
202	functional connectivity	Receptors	5HT6	syn	0.366547	0.25527	-0.7308	61	(0.5, 3, 1)	0	0	entorhinal	1	0	0.419543	lower
203	functional connectivity	metabolism	cbv	clear	0.365103	0.245741	-0.709383	63	(0.01, 1, 1)	0	0	entorhinal	1	0	0.419543	lower
204	functional connectivity	Cortical expansion	evoexp	clear	0.363442	0.296283	-0.496088	24	(0.3, 3, 1)	0	0	entorhinal	1	0	0.419543	lower
205	functional connectivity	Cortical expansion	evoexp	spread	0.363366	0.142729	-0.282343	461	(0.9, 1.5, 0.1)	0	0	precuneus	0	1	0.201823	higher
206	functional connectivity	Receptors	H3	clear	0.355849	0.20209	-0.0618355	29999	(0.9, 1, 1)	1	0	precuneus	0	0	0.201823	higher
207	functional connectivity	Cortical expansion	scalinghcp	spread	0.355532	0.190859	-0.0160116	5109	(0.01, 1, 0.1)	0	0	precuneus	0	0	0.201823	higher
208	functional connectivity	Cortical expansion	scaling	spread	0.354676	0.154012	-0.136765	1032	(0.9, 1, 0.3)	0	0	precuneus	0	0	0.201823	higher
209	functional connectivity	Cortical expansion	scalingnih	spread	0.354317	0.156039	-0.134409	1014	(0.9, 1, 0.3)	0	0	precuneus	0	0	0.201823	higher
210	functional connectivity	Receptors	H3	syn	0.352749	0.231494	-0.770141	51	(0.1, 3, 1)	0	0	entorhinal	1	0	0.419543	lower
211	functional connectivity	Receptors	5HT2a	clear	0.347752	0.298816	-0.928273	575	(0.5, 0.1, 0.1)	0	0	entorhinal	1	0	0.419543	lower
212	functional connectivity	Celltype	OPC	spread	0.342348	0.155937	-0.186594	599	(0.9, 0.9, 1)	0	0	precuneus	0	1	0.201823	higher
213	functional connectivity	AD-realted	Abeta	clear	0.33812	0.307173	-0.95566	445	(0.5, 0.1, 0.1)	0	0	entorhinal	1	0	0.419543	lower
214	functional connectivity	Receptors	CB1	mis	0.337577	0.143756	-0.318356	78	(0.01, 2.5, 1)	0	0	precuneus	0	0	0.201823	higher
215	functional connectivity	Celltype	Astro	spread	0.333481	0.153338	-0.208644	908	(0.9, 1, 0.3)	0	0	precuneus	0	1	0.201823	higher
216	functional connectivity	Cortical expansion	scalingpnc	clear	0.331104	0.303267	-0.942112	600	(0.01, 0.1, 0.1)	0	0	entorhinal	1	0	0.419543	lower
217	functional connectivity	Receptors	mGluR5	clear	0.327563	0.240783	-0.653928	40	(0.9, 3, 1)	0	0	entorhinal	1	0	0.419543	lower
218	functional connectivity	Celltype	Endo	clear	0.32725	0.157639	-0.185722	29999	(0.7, 0.5, 1)	1	0	precuneus	0	1	0.201823	higher
219	functional connectivity	metabolism	cmr02	mis	0.32719	0.276813	-0.832374	51	(0.7, 3, 0.9)	0	0	entorhinal	1	0	0.419543	lower
220	functional connectivity	Receptors	mGluR5	spread	0.326933	0.173113	-0.219842	29999	(0.9, 3, 1)	1	0	precuneus	0	1	0.201823	higher
221	functional connectivity	Celltype	Endo	mis	0.325445	0.265394	-0.940398	227	(0.01, 2.9, 0.1)	0	0	entorhinal	1	0	0.419543	lower
222	functional connectivity	Celltype	Oligo	clear	0.325091	0.204659	-0.860481	106	(0.1, 1, 0.3)	1	0	precuneus	0	1	0.201823	higher
223	functional connectivity	Receptors	D1	clear	0.323656	0.291949	-1.08032	308	(0.01, 0.5, 0.1)	0	0	entorhinal	1	0	0.419543	lower
224	functional connectivity	Cortical expansion	scalingpnc	spread	0.323645	0.138959	-0.396101	358	(0.9, 1.5, 0.5)	1	0	precuneus	0	1	0.201823	higher
225	functional connectivity	Microstructure	myelinmap	mis	0.322215	0.282042	-1.00936	53	(0.7, 3, 0.9)	0	0	entorhinal	1	0	0.419543	lower
226	functional connectivity	Cortical expansion	scalingpnc	mis	0.321723	0.166818	-0.210331	238	(0.7, 3, 0.3)	0	0	precuneus	0	0	0.201823	higher
227	functional connectivity	Receptors	D1	spread	0.32051	0.140312	-0.423255	2591	(0.9, 0.9, 0.1)	1	0	precuneus	0	1	0.201823	higher
228	functional connectivity	Cortical expansion	scaling	clear	0.318858	0.309878	-0.93767	589	(0.01, 0.1, 0.1)	0	0	entorhinal	1	0	0.419543	lower
229	functional connectivity	Celltype	Oligo	mis	0.31735	0.293627	-1.00496	268	(0.01, 2.5, 0.1)	0	0	entorhinal	1	0	0.419543	lower
230	functional connectivity	metabolism	cmrglc	mis	0.316362	0.289522	-0.848087	56	(0.5, 3, 0.5)	0	0	entorhinal	1	0	0.419543	lower
231	functional connectivity	Receptors	H3	mis	0.316259	0.305405	-1.02433	471	(0.01, 1.5, 0.1)	0	0	entorhinal	1	0	0.419543	lower
232	functional connectivity	AD-realted	APOE	mis	0.315702	0.288955	-0.809418	51	(0.7, 3, 0.7)	0	0	entorhinal	1	0	0.419543	lower
233	functional connectivity	Microstructure	genepc1	mis	0.314707	0.285834	-0.892324	46	(0.7, 3, 1)	0	0	entorhinal	1	0	0.419543	lower
234	functional connectivity	Cortical expansion	scalingnih	clear	0.314123	0.312213	-0.962826	613	(0.01, 0.1, 0.1)	0	0	entorhinal	1	0	0.419543	lower
235	functional connectivity	Receptors	A4B2	mis	0.313437	0.303934	-1.03146	411	(0.01, 1.5, 0.1)	0	0	entorhinal	1	0	0.419543	lower
236	functional connectivity	Receptors	CB1	syn	0.313317	0.15347	-0.247234	101	(0.5, 3, 0.9)	0	0	precuneus	0	0	0.201823	higher
237	functional connectivity	Receptors	5HTT	mis	0.312599	0.30724	-1.02822	413	(0.01, 1.5, 0.1)	0	0	entorhinal	1	0	0.419543	lower
238	functional connectivity	Receptors	CB1	clear	0.312108	0.315802	-1.0876	563	(0.01, 0.1, 0.1)	0	0	entorhinal	1	0	0.419543	lower
239	functional connectivity	Receptors	NET	mis	0.311511	0.309851	-1.02748	432	(0.01, 0.9, 0.1)	0	0	entorhinal	1	0	0.419543	lower
240	functional connectivity	Receptors	VAChT	mis	0.310915	0.309873	-1.00147	527	(0.01, 0.9, 0.1)	0	0	entorhinal	1	0	0.419543	lower
241	functional connectivity	Receptors	GABAa	mis	0.30994	0.301895	-1.01766	54	(0.7, 3, 1)	0	0	entorhinal	1	0	0.419543	lower
242	functional connectivity	Cortical expansion	scalinghcp	clear	0.309749	0.315324	-0.962169	596	(0.01, 0.1, 0.1)	0	0	entorhinal	1	0	0.419543	lower
243	functional connectivity	metabolism	cbf	mis	0.309071	0.312169	-1.03233	534	(0.01, 0.5, 0.1)	0	0	entorhinal	1	0	0.419543	lower
244	functional connectivity	Cortical expansion	scalingpnc	syn	0.307563	0.169983	-0.339601	186	(0.5, 3, 0.1)	0	0	precuneus	0	0	0.201823	higher
245	functional connectivity	Receptors	5HT1b	mis	0.30285	0.295031	-0.954552	53	(0.7, 3, 0.9)	0	0	entorhinal	1	0	0.419543	lower
246	functional connectivity	Receptors	NET	spread	0.299882	0.164458	-0.297147	29999	(0.9, 3, 1)	0	0	precuneus	0	1	0.201823	higher
247	functional connectivity	Receptors	5HT4	clear	0.299504	0.325004	-1.08816	509	(0.01, 0.1, 0.1)	0	0	entorhinal	1	0	0.419543	lower
248	functional connectivity	Cortical expansion	devexp	spread	0.298871	0.162012	-0.269161	1357	(0.9, 1, 0.1)	0	0	precuneus	0	0	0.201823	higher
249	functional connectivity	Receptors	DAT	spread	0.297848	0.13377	-0.623738	2279	(0.9, 0.9, 0.1)	1	0	precuneus	0	1	0.201823	higher
250	functional connectivity	Receptors	mGluR5	syn	0.292928	0.250031	-1.00372	57	(0.1, 3, 1)	0	0	entorhinal	1	0	0.419543	lower
251	functional connectivity	Receptors	5HTT	clear	0.290883	0.197361	-0.152784	55	(0.7, 3, 1)	1	0	precuneus	0	0	0.201823	higher
252	functional connectivity	AD-realted	MAPT	clear	0.286788	0.330985	-1.06252	581	(0.01, 0.1, 0.1)	0	0	entorhinal	1	0	0.419543	lower
253	functional connectivity	Microstructure	thickness	clear	0.285145	0.331228	-1.07172	527	(0.01, 0.1, 0.1)	0	0	entorhinal	1	0	0.419543	lower
254	functional connectivity	Receptors	DAT	clear	0.285144	0.301962	-0.958727	27	(0.01, 1.5, 1)	0	0	entorhinal	1	0	0.419543	lower
255	functional connectivity	Receptors	5HT1a	clear	0.283236	0.330655	-1.07641	556	(0.01, 0.1, 0.1)	0	0	entorhinal	1	0	0.419543	lower
256	functional connectivity	Celltype	Micro	spread	0.282587	0.1906	-0.62036	902	(0.9, 0.9, 0.3)	1	0	precuneus	0	1	0.201823	higher
257	functional connectivity	Receptors	MOR	clear	0.280699	0.319268	-1.12226	20	(0.01, 2.9, 1)	0	0	entorhinal	1	0	0.419543	lower
258	functional connectivity	Microstructure	genepc1	syn	0.279453	0.28988	-1.03165	46	(0.5, 3, 1)	0	0	entorhinal	1	0	0.419543	lower
259	functional connectivity	metabolism	cmrglc	syn	0.278015	0.284237	-0.652048	58	(0.3, 3, 1)	0	0	entorhinal	1	0	0.419543	lower
260	functional connectivity	Receptors	D2	clear	0.259607	0.318403	-1.03875	21	(0.01, 2.9, 1)	0	0	entorhinal	1	0	0.419543	lower
261	functional connectivity	metabolism	cmr02	syn	0.255138	0.28861	-1.28755	53	(0.5, 3, 1)	0	0	entorhinal	1	0	0.419543	lower
262	functional connectivity	Receptors	5HT6	spread	0.25195	0.208464	-0.247996	22815	(0.9, 3, 0.1)	1	0	precuneus	0	1	0.201823	higher
263	functional connectivity	Receptors	A4B2	spread	0.248366	0.236637	-0.321578	29999	(0.9, 3, 1)	0	0	precuneus	0	1	0.201823	higher
264	functional connectivity	Receptors	5HT6	clear	0.244896	0.293025	-0.574895	29999	(0.7, 3, 1)	0	0	precuneus	0	0	0.201823	higher
265	functional connectivity	Receptors	5HT1b	syn	0.243305	0.165058	-1.57441	468	(0.01, 0.9, 1)	0	0	entorhinal	1	0	0.419543	lower
266	functional connectivity	AD-realted	APOE	syn	0.239755	0.314384	-1.11347	69	(0.9, 3, 0.5)	0	0	entorhinal	1	0	0.419543	lower
267	functional connectivity	Celltype	Neuro-Ex	mis	0.239347	0.310319	-1.86803	422	(0.9, 1, 1)	1	0	precuneus	0	0	0.201823	higher
268	functional connectivity	Celltype	Neuro-Ex	syn	0.236185	0.297337	-1.86513	350	(0.7, 0.9, 0.1)	0	0	precuneus	0	0	0.201823	higher
269	functional connectivity	metabolism	cbf	syn	0.235215	0.193218	-1.91909	406	(0.01, 0.9, 1)	0	0	entorhinal	1	0	0.419543	lower
270	functional connectivity	Receptors	M1	spread	0.234607	0.17855	-0.378097	24835	(0.9, 3, 0.1)	1	0	precuneus	0	1	0.201823	higher
271	functional connectivity	metabolism	cbf	syn	0.232382	0.167462	-1.26962	29999	(0.01, 0.5, 0.1)	0	0	precuneus	0	0	0.201823	higher
272	functional connectivity	Receptors	MOR	mis	0.229476	0.21989	-0.334614	29999	(0.5, 3, 1)	0	0	precuneus	0	0	0.201823	higher
273	functional connectivity	Celltype	Micro	mis	0.229132	0.202165	-0.878087	52	(0.3, 3, 1)	0	0	precuneus	0	0	0.201823	higher
274	functional connectivity	Celltype	Micro	syn	0.227655	0.196365	-0.715663	83	(0.3, 2.9, 0.3)	0	0	precuneus	0	0	0.201823	higher
275	functional connectivity	AD-realted	APOE	spread	0.219753	0.237697	-0.419032	29999	(0.9, 3, 1)	0	0	precuneus	0	0	0.201823	higher
276	functional connectivity	Celltype	Neuro-In	mis	0.214204	0.31527	-2.18163	1850	(0.9, 0.9, 0.1)	1	0	precuneus	0	0	0.201823	higher
277	functional connectivity	Celltype	Endo	spread	0.210951	0.284589	-1.03822	372	(0.05, 2.9, 0.1)	0	0	precuneus	0	0	0.201823	higher
278	functional connectivity	Celltype	Neuro-In	syn	0.209926	0.306987	-2.2558	636	(0.7, 0.9, 0.1)	0	0	precuneus	0	0	0.201823	higher
279	functional connectivity	Receptors	A4B2	syn	0.19839	0.227229	-2.16626	582	(0.01, 0.9, 1)	0	0	entorhinal	1	0	0.419543	lower
280	functional connectivity	Receptors	MOR	syn	0.192796	0.146858	-0.848847	102	(0.5, 3, 1)	0	0	precuneus	0	0	0.201823	lower
281	functional connectivity	Celltype	Neuro-Ex	spread	0.191043	0.243824	-1.22354	1241	(0.9, 0.9, 0.1)	0	0	precuneus	0	1	0.201823	lower
282	functional connectivity	Celltype	Neuro-In	spread	0.189321	0.242631	-1.16751	1307	(0.9, 0.9, 0.1)	0	0	precuneus	0	1	0.201823	lower
283	functional connectivity	Receptors	M1	clear	0.189259	0.274178	-0.54365	29999	(0.7, 3, 1)	0	0	precuneus	0	0	0.201823	lower
284	functional connectivity	Receptors	NET	syn	0.188457	0.147525	-1.27654	29999	(0.01, 0.5, 1)	0	0	precuneus	1	0	0.201823	lower
285	functional connectivity	Receptors	NMDA	clear	0.186624	0.243991	-0.816891	81	(0.01, 0.9, 0.5)	1	0	precuneus	0	0	0.201823	lower
286	functional connectivity	Receptors	5HT1b	syn	0.18562	0.162641	-1.06331	29999	(0.01, 0.5, 1)	0	0	precuneus	0	0	0.201823	lower
287	functional connectivity	Celltype	Neuro-Ex	clear	0.181232	0.226	-1.65968	75	(0.01, 1, 1)	0	0	precuneus	0	0	0.201823	lower
288	functional connectivity	Celltype	Oligo	spread	0.179862	0.275939	-1.25232	338	(0.1, 2.9, 0.1)	0	0	precuneus	0	0	0.201823	lower
289	functional connectivity	AD-realted	Cluster5	spread	0.177521	0.163889	-0.978109	402	(0.9, 1.5, 0.1)	0	0	precuneus	0	0	0.201823	lower
290	functional connectivity	AD-realted	Cluster1	spread	0.177521	0.163889	-0.978109	402	(0.9, 1.5, 0.1)	0	0	precuneus	0	0	0.201823	lower
291	functional connectivity	AD-realted	Cluster1	clear	0.177521	0.163889	-0.978109	402	(0.9, 1.5, 0.1)	0	0	precuneus	0	0	0.201823	lower
292	functional connectivity	AD-realted	Cluster1	syn	0.177521	0.163889	-0.978109	402	(0.9, 1.5, 0.1)	1	0	precuneus	0	1	0.201823	lower
293	functional connectivity	AD-realted	Cluster5	syn	0.177521	0.163889	-0.978109	402	(0.9, 1.5, 0.1)	1	0	precuneus	0	1	0.201823	lower
294	functional connectivity	AD-realted	Cluster6	clear	0.177521	0.163889	-0.978109	402	(0.9, 1.5, 0.1)	0	0	precuneus	0	0	0.201823	lower
295	functional connectivity	AD-realted	Cluster6	mis	0.177521	0.163889	-0.978109	402	(0.9, 1.5, 0.1)	0	0	precuneus	0	0	0.201823	lower
296	functional connectivity	AD-realted	Cluster6	spread	0.177521	0.163889	-0.978109	402	(0.9, 1.5, 0.1)	0	0	precuneus	0	0	0.201823	lower
297	functional connectivity	AD-realted	Cluster1	mis	0.177521	0.163889	-0.978109	402	(0.9, 1.5, 0.1)	0	0	precuneus	0	0	0.201823	lower
298	functional connectivity	AD-realted	Cluster4	spread	0.177521	0.163889	-0.978109	402	(0.9, 1.5, 0.1)	0	0	precuneus	0	0	0.201823	lower
299	functional connectivity	AD-realted	Cluster2	clear	0.177521	0.163889	-0.978109	402	(0.9, 1.5, 0.1)	0	0	precuneus	0	0	0.201823	lower
300	functional connectivity	AD-realted	Cluster7	syn	0.177521	0.163889	-0.978109	402	(0.9, 1.5, 0.1)	1	0	precuneus	0	1	0.201823	lower
301	functional connectivity	AD-realted	Cluster4	syn	0.177521	0.163889	-0.978109	402	(0.9, 1.5, 0.1)	1	0	precuneus	0	1	0.201823	lower
302	functional connectivity	AD-realted	Cluster7	spread	0.177521	0.163889	-0.978109	402	(0.9, 1.5, 0.1)	0	0	precuneus	0	0	0.201823	lower
303	functional connectivity	AD-realted	Cluster4	clear	0.177521	0.163889	-0.978109	402	(0.9, 1.5, 0.1)	0	0	precuneus	0	0	0.201823	lower
304	functional connectivity	AD-realted	Cluster3	syn	0.177521	0.163889	-0.978109	402	(0.9, 1.5, 0.1)	1	0	precuneus	0	1	0.201823	lower
305	functional connectivity	AD-realted	Cluster3	spread	0.177521	0.163889	-0.978109	402	(0.9, 1.5, 0.1)	0	0	precuneus	0	0	0.201823	lower
306	functional connectivity	AD-realted	Cluster5	clear	0.177521	0.163889	-0.978109	402	(0.9, 1.5, 0.1)	0	0	precuneus	0	0	0.201823	lower
307	functional connectivity	AD-realted	Cluster6	syn	0.177521	0.163889	-0.978109	402	(0.9, 1.5, 0.1)	1	0	precuneus	0	1	0.201823	lower
308	functional connectivity	AD-realted	Cluster3	mis	0.177521	0.163889	-0.978109	402	(0.9, 1.5, 0.1)	0	0	precuneus	0	0	0.201823	lower
309	functional connectivity	AD-realted	Cluster5	mis	0.177521	0.163889	-0.978109	402	(0.9, 1.5, 0.1)	0	0	precuneus	0	0	0.201823	lower
310	functional connectivity	AD-realted	Cluster3	clear	0.177521	0.163889	-0.978109	402	(0.9, 1.5, 0.1)	0	0	precuneus	0	0	0.201823	lower
311	functional connectivity	AD-realted	Cluster2	syn	0.177521	0.163889	-0.978109	402	(0.9, 1.5, 0.1)	1	0	precuneus	0	1	0.201823	lower
312	functional connectivity	AD-realted	Cluster2	spread	0.177521	0.163889	-0.978109	402	(0.9, 1.5, 0.1)	0	0	precuneus	0	0	0.201823	lower
313	functional connectivity	AD-realted	Cluster7	mis	0.177521	0.163889	-0.978109	402	(0.9, 1.5, 0.1)	0	0	precuneus	0	0	0.201823	lower
314	functional connectivity	AD-realted	Cluster4	mis	0.177521	0.163889	-0.978109	402	(0.9, 1.5, 0.1)	0	0	precuneus	0	0	0.201823	lower
315	functional connectivity	AD-realted	Cluster2	mis	0.177521	0.163889	-0.978109	402	(0.9, 1.5, 0.1)	0	0	precuneus	0	0	0.201823	lower
316	functional connectivity	AD-realted	Cluster7	clear	0.177521	0.163889	-0.978109	402	(0.9, 1.5, 0.1)	0	0	precuneus	0	0	0.201823	lower
317	functional connectivity				0.177521	0.163889	-0.978109	402	(0.9, 1.5, 0.1)	0	1	precuneus	0	0	0.201823	lower
318	functional connectivity	AD-realted	APOE	syn	0.174105	0.144521	-1.33746	5445	(0.01, 0.5, 1)	0	0	precuneus	0	0	0.201823	lower
319	functional connectivity	Receptors	GABAa	syn	0.172178	0.166372	-1.22599	507	(0.01, 0.5, 1)	0	0	precuneus	1	0	0.201823	lower
320	functional connectivity	Celltype	Neuro-In	clear	0.169092	0.218849	-1.66656	67	(0.01, 1, 1)	0	0	precuneus	0	0	0.201823	lower
321	functional connectivity	metabolism	cmrglc	syn	0.167797	0.141992	-1.23894	618	(0.01, 0.5, 0.9)	0	0	precuneus	0	0	0.201823	lower
322	functional connectivity	Receptors	5HTT	spread	0.164891	0.262871	-1.05188	531	(0.3, 2, 0.1)	0	0	precuneus	0	1	0.201823	lower
323	functional connectivity	Microstructure	genepc1	spread	0.164025	0.269056	-1.41651	336	(0.1, 2.9, 0.1)	0	0	precuneus	0	0	0.201823	lower
324	functional connectivity	metabolism	cbv	clear	0.161038	0.175889	-0.853758	61	(0.01, 1, 1)	1	0	precuneus	0	0	0.201823	lower
325	functional connectivity	Microstructure	myelinmap	spread	0.156924	0.267885	-1.34863	340	(0.1, 2.9, 0.1)	0	0	precuneus	0	0	0.201823	lower
326	functional connectivity	metabolism	cmr02	spread	0.145928	0.273185	-1.15126	317	(0.1, 3, 0.1)	0	0	precuneus	0	0	0.201823	lower
327	functional connectivity	metabolism	cmr02	syn	0.145565	0.145199	-1.59052	361	(0.01, 0.5, 0.9)	0	0	precuneus	0	0	0.201823	lower
328	functional connectivity	Celltype	Endo	syn	0.144621	0.19804	-1.51517	888	(0.01, 0.5, 0.1)	0	0	precuneus	0	0	0.201823	lower
329	functional connectivity	Receptors	A4B2	syn	0.14326	0.19043	-1.42939	29999	(0.01, 0.5, 0.1)	0	0	precuneus	0	0	0.201823	lower
330	functional connectivity	Receptors	GABAa	syn	0.141062	0.386053	-2.73349	67	(0.01, 2.9, 1)	0	0	entorhinal	0	0	0.419543	lower
331	functional connectivity	Receptors	M1	syn	0.138054	0.189203	-1.25418	629	(0.01, 2, 0.1)	0	0	precuneus	0	0	0.201823	lower
332	functional connectivity	Receptors	NET	syn	0.13805	0.292828	-3.10823	551	(0.01, 0.9, 1)	0	0	entorhinal	0	0	0.419543	lower
333	functional connectivity	metabolism	cbv	spread	0.134362	0.160657	-0.912782	213	(0.7, 3, 0.1)	0	0	precuneus	0	1	0.201823	lower
334	functional connectivity	metabolism	cmrglc	spread	0.134106	0.274302	-1.18434	314	(0.1, 3, 0.1)	0	0	precuneus	0	0	0.201823	lower
335	functional connectivity	Receptors	mGluR5	syn	0.131729	0.182241	-1.44764	84	(0.3, 3, 1)	0	0	precuneus	0	0	0.201823	lower
336	functional connectivity	Receptors	NMDA	spread	0.124687	0.156399	-1.0989	268	(0.7, 2.5, 0.1)	0	0	precuneus	0	1	0.201823	lower
337	functional connectivity	Receptors	5HT1b	spread	0.124242	0.262363	-0.969546	321	(0.3, 2.5, 0.1)	0	0	precuneus	0	0	0.201823	lower
338	functional connectivity	Receptors	VAChT	syn	0.124223	0.195718	-1.64648	152	(0.01, 0.5, 1)	0	0	precuneus	0	0	0.201823	lower
339	functional connectivity	Receptors	NMDA	syn	0.124207	0.223169	-1.52162	449	(0.01, 0.5, 0.1)	0	0	precuneus	0	0	0.201823	lower
340	functional connectivity	Receptors	D1	syn	0.122742	0.176445	-1.44431	102	(0.3, 3, 0.7)	0	0	precuneus	0	0	0.201823	lower
341	functional connectivity	Receptors	DAT	syn	0.120943	0.181624	-1.48377	94	(0.3, 3, 1)	0	0	precuneus	0	0	0.201823	lower
342	functional connectivity	Receptors	5HT6	syn	0.119697	0.234722	-1.16619	415	(0.01, 0.5, 0.1)	0	0	precuneus	0	0	0.201823	lower
343	functional connectivity	Microstructure	genepc1	syn	0.117293	0.144155	-2.00229	293	(0.01, 0.5, 1)	0	0	precuneus	0	0	0.201823	lower
344	functional connectivity	Receptors	5HTT	syn	0.117255	0.239794	-1.65226	610	(0.01, 0.5, 0.1)	0	0	precuneus	0	0	0.201823	lower
345	functional connectivity	Celltype	Oligo	syn	0.117195	0.21864	-1.63053	249	(0.01, 1.9, 0.1)	0	0	precuneus	0	0	0.201823	lower
346	functional connectivity	Receptors	VAChT	spread	0.116259	0.261902	-0.826509	364	(0.1, 3, 0.1)	0	0	precuneus	0	0	0.201823	lower
347	functional connectivity	Receptors	H3	syn	0.115929	0.213975	-1.56195	109	(0.01, 0.5, 1)	0	0	precuneus	0	0	0.201823	lower
348	functional connectivity	Receptors	mGluR5	clear	0.113101	0.390654	-0.72793	29999	(0.7, 3, 1)	0	0	precuneus	0	0	0.201823	lower
349	functional connectivity	Receptors	H3	spread	0.109414	0.177297	-1.23705	253	(0.7, 2.5, 0.1)	0	0	precuneus	0	1	0.201823	lower
350	functional connectivity	metabolism	cbf	spread	0.101526	0.271855	-0.889202	326	(0.1, 3, 0.1)	0	0	precuneus	0	0	0.201823	lower
351	functional connectivity	Receptors	mGluR5	mis	0.100979	0.212406	-2.28419	104	(0.01, 1.5, 1)	0	0	precuneus	0	0	0.201823	lower
352	functional connectivity	Microstructure	myelinmap	syn	0.0951057	0.209404	-1.63576	95	(0.01, 0.5, 1)	0	0	precuneus	0	0	0.201823	lower
353	functional connectivity	Receptors	D1	mis	0.0925957	0.236624	-1.97378	74	(0.01, 1.5, 1)	0	0	precuneus	0	0	0.201823	lower
354	functional connectivity	metabolism	cbv	syn	0.0913665	0.379353	-0.507963	29999	(0.9, 3, 1)	0	0	precuneus	0	0	0.201823	lower
355	functional connectivity	Receptors	DAT	mis	0.0885567	0.243997	-1.65248	53	(0.01, 2, 1)	0	0	precuneus	0	0	0.201823	lower
356	functional connectivity	Microstructure	thickness	clear	0.0841305	0.285449	-1.57638	33	(0.01, 0.1, 1)	0	0	precuneus	0	0	0.201823	lower
357	functional connectivity	Cortical expansion	evoexp	clear	0.0836652	0.278822	-1.59226	35	(0.01, 0.1, 1)	0	0	precuneus	0	0	0.201823	lower
358	functional connectivity	Receptors	MOR	clear	0.0832442	0.280088	-1.61024	36	(0.01, 0.1, 1)	0	0	precuneus	0	0	0.201823	lower
359	functional connectivity	Receptors	CB1	clear	0.0823785	0.280892	-1.57721	35	(0.01, 0.1, 1)	0	0	precuneus	0	0	0.201823	lower
360	functional connectivity	Receptors	D2	clear	0.0823468	0.28254	-1.58266	34	(0.01, 0.1, 1)	0	0	precuneus	0	0	0.201823	lower
361	functional connectivity	Receptors	5HT1a	clear	0.0819494	0.28459	-1.62043	34	(0.01, 0.1, 1)	0	0	precuneus	0	0	0.201823	lower
362	functional connectivity	Receptors	5HT4	clear	0.0816212	0.292769	-1.59132	31	(0.01, 0.1, 1)	0	0	precuneus	0	0	0.201823	lower
363	functional connectivity	Cortical expansion	devexp	clear	0.080674	0.282511	-1.61008	36	(0.01, 0.1, 1)	0	0	precuneus	0	0	0.201823	lower
364	functional connectivity	AD-realted	Abeta	clear	0.0797954	0.295286	-1.5932	31	(0.01, 0.1, 1)	0	0	precuneus	0	0	0.201823	lower
365	functional connectivity	Celltype	Astro	clear	0.078813	0.266962	-1.62009	180	(0.01, 0.1, 0.1)	0	0	precuneus	0	0	0.201823	lower
366	functional connectivity	Receptors	M1	mis	0.0785695	0.255642	-1.70072	56	(0.01, 1, 1)	0	0	precuneus	0	0	0.201823	lower
367	functional connectivity	Receptors	5HT2a	clear	0.0785322	0.284038	-1.62347	39	(0.01, 0.1, 1)	0	0	precuneus	0	0	0.201823	lower
368	functional connectivity	AD-realted	MAPT	clear	0.0784589	0.295977	-1.58644	29	(0.01, 0.1, 1)	0	0	precuneus	0	0	0.201823	lower
369	functional connectivity	Cortical expansion	scalinghcp	clear	0.0780702	0.2945	-1.57456	33	(0.01, 0.1, 1)	0	0	precuneus	0	0	0.201823	lower
370	functional connectivity	Celltype	OPC	clear	0.0780597	0.268333	-1.64511	179	(0.01, 0.1, 0.1)	0	0	precuneus	0	0	0.201823	lower
371	functional connectivity	Cortical expansion	scaling	clear	0.0778554	0.294127	-1.58642	33	(0.01, 0.1, 1)	0	0	precuneus	0	0	0.201823	lower
372	functional connectivity	Cortical expansion	scalingnih	clear	0.0776856	0.29247	-1.60357	34	(0.01, 0.1, 1)	0	0	precuneus	0	0	0.201823	lower
373	functional connectivity	Cortical expansion	scalingpnc	clear	0.077263	0.293283	-1.58162	33	(0.01, 0.1, 1)	0	0	precuneus	0	0	0.201823	lower
374	functional connectivity	Celltype	Micro	clear	0.0771937	0.269269	-1.64677	188	(0.01, 0.1, 0.1)	0	0	precuneus	0	0	0.201823	lower
375	functional connectivity	Receptors	DAT	clear	0.075348	0.273829	-1.64062	35	(0.01, 0.5, 1)	0	0	precuneus	0	0	0.201823	lower
376	functional connectivity	Receptors	5HT6	mis	0.0753243	0.279731	-1.63624	222	(0.01, 0.1, 0.1)	0	0	precuneus	0	0	0.201823	lower
377	functional connectivity	Receptors	H3	mis	0.0752365	0.280055	-1.63778	218	(0.01, 0.1, 0.1)	0	0	precuneus	0	0	0.201823	lower
378	functional connectivity	Receptors	NMDA	mis	0.0752074	0.280312	-1.63875	218	(0.01, 0.1, 0.1)	0	0	precuneus	0	0	0.201823	lower
379	functional connectivity	Receptors	VAChT	mis	0.0751613	0.280449	-1.63318	214	(0.01, 0.1, 0.1)	0	0	precuneus	0	0	0.201823	lower
380	functional connectivity	Receptors	A4B2	mis	0.0751109	0.280314	-1.62996	215	(0.01, 0.1, 0.1)	0	0	precuneus	0	0	0.201823	lower
381	functional connectivity	Celltype	Oligo	mis	0.0750944	0.280819	-1.66053	215	(0.01, 0.1, 0.1)	0	0	precuneus	0	0	0.201823	lower
382	functional connectivity	metabolism	cbv	mis	0.0750931	0.28053	-1.6303	215	(0.01, 0.1, 0.1)	0	0	precuneus	0	0	0.201823	lower
383	functional connectivity	Receptors	5HTT	mis	0.0750918	0.280485	-1.631	214	(0.01, 0.1, 0.1)	0	0	precuneus	0	0	0.201823	lower
384	functional connectivity	Receptors	GABAa	mis	0.0748773	0.280895	-1.6213	210	(0.01, 0.1, 0.1)	0	0	precuneus	0	0	0.201823	lower
385	functional connectivity	Microstructure	myelinmap	mis	0.0747167	0.281556	-1.63609	206	(0.01, 0.1, 0.1)	0	0	precuneus	0	0	0.201823	lower
386	functional connectivity	Microstructure	genepc1	mis	0.0746288	0.281804	-1.63212	205	(0.01, 0.1, 0.1)	0	0	precuneus	0	0	0.201823	lower
387	functional connectivity	Receptors	5HT1b	mis	0.0746169	0.28147	-1.63665	205	(0.01, 0.1, 0.1)	0	0	precuneus	0	0	0.201823	lower
388	functional connectivity	metabolism	cmrglc	mis	0.0746124	0.281617	-1.63465	206	(0.01, 0.1, 0.1)	0	0	precuneus	0	0	0.201823	lower
389	functional connectivity	Receptors	NET	mis	0.0745892	0.281899	-1.63775	204	(0.01, 0.1, 0.1)	0	0	precuneus	0	0	0.201823	lower
390	functional connectivity	metabolism	cmr02	mis	0.0745582	0.281803	-1.63475	205	(0.01, 0.1, 0.1)	0	0	precuneus	0	0	0.201823	lower
391	functional connectivity	AD-realted	APOE	mis	0.0745325	0.282055	-1.63239	202	(0.01, 0.1, 0.1)	0	0	precuneus	0	0	0.201823	lower
392	functional connectivity	Receptors	D1	clear	0.074307	0.285815	-1.65913	180	(0.01, 0.1, 0.1)	0	0	precuneus	0	0	0.201823	lower
393	functional connectivity	metabolism	cbf	mis	0.0741852	0.282788	-1.63747	198	(0.01, 0.1, 0.1)	0	0	precuneus	0	0	0.201823	lower
394	functional connectivity	Celltype	Endo	mis	0.0711299	0.235482	-1.5622	234	(0.1, 3, 0.1)	0	0	precuneus	0	0	0.201823	lower
1	gene coexpression	Receptors	D2	mis	0.804641	0.130564	0.616469	128	(0.5, 3, 0.5)	1	0	entorhinal	1	1	0.458187	higher
2	gene coexpression	AD-realted	MAPT	spread	0.797414	0.0722751	0.634732	292	(0.3, 3, 0.1)	1	0	entorhinal	1	1	0.458187	higher
3	gene coexpression	metabolism	cbv	spread	0.793033	0.0836774	0.618775	403	(0.5, 2, 0.1)	1	0	entorhinal	1	1	0.458187	higher
4	gene coexpression	AD-realted	MAPT	mis	0.787571	0.0812521	0.613602	243	(0.1, 3, 0.3)	0	0	entorhinal	1	0	0.458187	higher
5	gene coexpression	Cortical expansion	scalinghcp	syn	0.776109	0.119386	0.487008	69	(0.3, 3, 0.7)	1	0	entorhinal	1	1	0.458187	higher
6	gene coexpression	Microstructure	thickness	syn	0.770978	0.119731	0.509246	679	(0.7, 1, 0.1)	1	0	precuneus	1	1	0.354659	higher
7	gene coexpression	Microstructure	genepc1	spread	0.770102	0.0902927	0.529002	291	(0.5, 2.9, 0.1)	1	0	entorhinal	1	1	0.458187	higher
8	gene coexpression	AD-realted	MAPT	syn	0.769486	0.0717613	0.583501	545	(0.1, 2, 0.1)	0	0	entorhinal	1	0	0.458187	higher
9	gene coexpression	Cortical expansion	scalinghcp	spread	0.76933	0.085465	0.570621	283	(0.5, 2.5, 0.1)	0	0	entorhinal	1	0	0.458187	higher
10	gene coexpression	Microstructure	thickness	mis	0.767078	0.121047	0.530724	521	(0.3, 2.9, 0.1)	1	0	entorhinal	1	0	0.458187	higher
11	gene coexpression	Cortical expansion	scaling	syn	0.762803	0.135437	0.464941	58	(0.5, 3, 1)	1	0	entorhinal	1	1	0.458187	higher
12	gene coexpression	Receptors	D2	syn	0.758571	0.143886	0.481427	664	(0.7, 0.9, 0.1)	1	0	precuneus	1	0	0.354659	higher
13	gene coexpression	Receptors	D2	mis	0.758428	0.150789	0.513901	1167	(0.9, 1, 1)	0	0	precuneus	0	1	0.354659	higher
14	gene coexpression	Cortical expansion	scalinghcp	mis	0.758268	0.146271	0.390583	84	(0.5, 2.9, 1)	0	0	entorhinal	1	0	0.458187	higher
15	gene coexpression	Receptors	D2	syn	0.757109	0.0870663	0.566711	117	(0.01, 3, 0.5)	0	0	entorhinal	0	0	0.458187	higher
16	gene coexpression	Microstructure	thickness	mis	0.754345	0.125766	0.516411	405	(0.7, 2.5, 0.1)	0	0	precuneus	0	0	0.354659	higher
17	gene coexpression	Celltype	Micro	spread	0.753537	0.0797996	0.554826	293	(0.5, 2.9, 0.1)	1	0	entorhinal	1	1	0.458187	higher
18	gene coexpression	metabolism	cbf	clear	0.750916	0.15853	0.227707	62	(0.01, 1.5, 1)	1	0	precuneus	1	1	0.354659	higher
19	gene coexpression	Microstructure	myelinmap	spread	0.749054	0.0985816	0.50516	304	(0.5, 2.5, 0.1)	1	0	entorhinal	1	1	0.458187	higher
20	gene coexpression	AD-realted	MAPT	mis	0.747026	0.0731032	0.555865	230	(0.9, 3, 0.3)	1	0	precuneus	0	0	0.354659	higher
21	gene coexpression	Cortical expansion	scaling	mis	0.746697	0.134205	0.398187	75	(0.5, 3, 1)	0	0	entorhinal	1	0	0.458187	higher
22	gene coexpression	Receptors	5HT1b	clear	0.745401	0.0981636	0.420659	115	(0.01, 1, 1)	1	0	precuneus	1	1	0.354659	higher
23	gene coexpression	Receptors	VAChT	clear	0.74531	0.156653	0.395403	55	(0.5, 3, 1)	1	0	entorhinal	1	1	0.458187	higher
24	gene coexpression	Receptors	5HT1a	syn	0.745126	0.131035	0.408227	294	(0.3, 2, 0.1)	1	0	precuneus	1	1	0.354659	higher
25	gene coexpression	Cortical expansion	scalingpnc	spread	0.744716	0.0849446	0.530566	256	(0.5, 2.9, 0.1)	1	0	entorhinal	1	1	0.458187	higher
26	gene coexpression	AD-realted	MAPT	syn	0.744693	0.0665361	0.548124	188	(0.7, 2.5, 0.1)	0	0	precuneus	0	0	0.354659	higher
27	gene coexpression	Cortical expansion	scaling	spread	0.744177	0.0861823	0.531122	272	(0.5, 2.5, 0.1)	0	0	entorhinal	1	0	0.458187	higher
28	gene coexpression	Microstructure	thickness	syn	0.743644	0.0760768	0.539962	187	(0.01, 2.5, 0.3)	0	0	entorhinal	0	1	0.458187	higher
29	gene coexpression	Receptors	5HT1a	mis	0.743295	0.137559	0.408411	601	(0.5, 1.9, 0.1)	0	0	precuneus	1	0	0.354659	higher
30	gene coexpression	Microstructure	thickness	spread	0.741355	0.0820525	0.54503	278	(0.3, 3, 0.1)	0	0	entorhinal	1	0	0.458187	higher
31	gene coexpression	Receptors	D2	spread	0.740544	0.0921413	0.545081	278	(0.3, 3, 0.1)	0	0	entorhinal	1	0	0.458187	higher
32	gene coexpression	Receptors	5HT1a	mis	0.737823	0.142801	0.404394	586	(0.1, 3, 0.1)	1	0	entorhinal	0	0	0.458187	higher
33	gene coexpression	Receptors	5HT4	mis	0.72683	0.143451	0.452976	374	(0.9, 2, 0.1)	1	0	entorhinal	1	1	0.458187	higher
34	gene coexpression	Receptors	5HT4	syn	0.718121	0.139021	0.430367	410	(0.9, 1, 0.1)	0	0	entorhinal	1	0	0.458187	higher
35	gene coexpression	Cortical expansion	scalingnih	syn	0.717357	0.104834	0.439347	109	(0.3, 2.5, 0.3)	1	0	entorhinal	1	1	0.458187	higher
36	gene coexpression	Receptors	5HT1a	spread	0.716679	0.093239	0.508776	289	(0.3, 3, 0.1)	0	0	entorhinal	1	0	0.458187	higher
37	gene coexpression	Cortical expansion	scalingpnc	syn	0.715817	0.127969	0.371542	58	(0.5, 3, 1)	0	0	entorhinal	1	0	0.458187	higher
38	gene coexpression	Celltype	Astro	spread	0.70842	0.115302	0.440229	321	(0.5, 2.5, 0.1)	1	0	entorhinal	1	1	0.458187	higher
39	gene coexpression	Receptors	5HT4	spread	0.707372	0.0887827	0.488106	294	(0.5, 2.5, 0.1)	0	0	entorhinal	1	0	0.458187	higher
40	gene coexpression	AD-realted	APOE	spread	0.706165	0.074283	0.467659	290	(0.5, 2.5, 0.1)	1	0	entorhinal	1	1	0.458187	higher
41	gene coexpression	Cortical expansion	scalingnih	spread	0.705987	0.0945828	0.478949	278	(0.5, 2.5, 0.1)	0	0	entorhinal	1	0	0.458187	higher
42	gene coexpression	Cortical expansion	scalingnih	mis	0.701127	0.106887	0.410677	89	(0.3, 3, 0.7)	0	0	entorhinal	1	0	0.458187	higher
43	gene coexpression	Cortical expansion	evoexp	syn	0.700771	0.201085	0.364553	104	(0.9, 2.5, 0.1)	1	0	entorhinal	1	1	0.458187	higher
44	gene coexpression	Receptors	5HTT	clear	0.700175	0.16601	0.147	43	(0.01, 2, 1)	1	0	entorhinal	1	1	0.458187	higher
45	gene coexpression	Cortical expansion	evoexp	mis	0.700009	0.154882	0.396476	117	(0.7, 3, 0.3)	0	0	entorhinal	1	0	0.458187	higher
46	gene coexpression	Celltype	OPC	spread	0.698383	0.115289	0.415374	327	(0.5, 2.5, 0.1)	1	0	entorhinal	1	1	0.458187	higher
47	gene coexpression	Receptors	5HT1b	clear	0.683956	0.0777867	0.361582	885	(0.1, 3, 0.1)	1	0	entorhinal	0	1	0.458187	higher
48	gene coexpression	metabolism	cmrglc	clear	0.680809	0.135674	0.318866	36	(0.01, 3, 1)	1	0	precuneus	1	1	0.354659	higher
49	gene coexpression	Receptors	M1	syn	0.679927	0.102139	0.327929	111	(0.1, 3, 0.3)	1	0	entorhinal	1	1	0.458187	higher
50	gene coexpression	Receptors	5HT2a	spread	0.678413	0.0984023	0.434047	250	(0.5, 2.9, 0.1)	1	0	entorhinal	1	1	0.458187	higher
51	gene coexpression	Receptors	M1	spread	0.669851	0.102478	0.422572	258	(0.5, 3, 0.1)	0	0	entorhinal	1	0	0.458187	higher
52	gene coexpression	Receptors	5HT6	spread	0.667006	0.102036	0.426155	266	(0.5, 2.9, 0.1)	1	0	entorhinal	1	1	0.458187	higher
53	gene coexpression	Cortical expansion	evoexp	spread	0.66654	0.0913466	0.406619	291	(0.5, 2.5, 0.1)	0	0	entorhinal	1	0	0.458187	higher
54	gene coexpression	Receptors	5HT2a	syn	0.662013	0.149107	0.236994	56	(0.5, 3, 1)	0	0	entorhinal	1	0	0.458187	higher
55	gene coexpression	Cortical expansion	scalingpnc	mis	0.657217	0.123916	0.257138	75	(0.5, 3, 1)	0	0	entorhinal	1	0	0.458187	higher
56	gene coexpression	AD-realted	Cluster1	mis	0.651486	0.103358	0.41403	285	(0.5, 2.5, 0.1)	0	0	entorhinal	1	0	0.458187	higher
57	gene coexpression	AD-realted	Cluster7	clear	0.651486	0.103358	0.41403	285	(0.5, 2.5, 0.1)	0	0	entorhinal	1	0	0.458187	higher
58	gene coexpression	AD-realted	Cluster4	clear	0.651486	0.103358	0.41403	285	(0.5, 2.5, 0.1)	0	0	entorhinal	1	0	0.458187	higher
59	gene coexpression	AD-realted	Cluster1	spread	0.651486	0.103358	0.41403	285	(0.5, 2.5, 0.1)	0	0	entorhinal	1	0	0.458187	higher
60	gene coexpression	AD-realted	Cluster3	syn	0.651486	0.103358	0.41403	285	(0.5, 2.5, 0.1)	1	0	entorhinal	1	1	0.458187	higher
61	gene coexpression	AD-realted	Cluster1	syn	0.651486	0.103358	0.41403	285	(0.5, 2.5, 0.1)	1	0	entorhinal	1	1	0.458187	higher
62	gene coexpression	AD-realted	Cluster3	spread	0.651486	0.103358	0.41403	285	(0.5, 2.5, 0.1)	0	0	entorhinal	1	0	0.458187	higher
63	gene coexpression	AD-realted	Cluster1	clear	0.651486	0.103358	0.41403	285	(0.5, 2.5, 0.1)	0	0	entorhinal	1	0	0.458187	higher
64	gene coexpression	AD-realted	Cluster3	clear	0.651486	0.103358	0.41403	285	(0.5, 2.5, 0.1)	0	0	entorhinal	1	0	0.458187	higher
65	gene coexpression	AD-realted	Cluster2	clear	0.651486	0.103358	0.41403	285	(0.5, 2.5, 0.1)	0	0	entorhinal	1	0	0.458187	higher
66	gene coexpression	AD-realted	Cluster2	mis	0.651486	0.103358	0.41403	285	(0.5, 2.5, 0.1)	0	0	entorhinal	1	0	0.458187	higher
67	gene coexpression	AD-realted	Cluster2	syn	0.651486	0.103358	0.41403	285	(0.5, 2.5, 0.1)	1	0	entorhinal	1	1	0.458187	higher
68	gene coexpression	AD-realted	Cluster6	syn	0.651486	0.103358	0.41403	285	(0.5, 2.5, 0.1)	1	0	entorhinal	1	1	0.458187	higher
69	gene coexpression	AD-realted	Cluster2	spread	0.651486	0.103358	0.41403	285	(0.5, 2.5, 0.1)	0	0	entorhinal	1	0	0.458187	higher
70	gene coexpression	AD-realted	Cluster3	mis	0.651486	0.103358	0.41403	285	(0.5, 2.5, 0.1)	0	0	entorhinal	1	0	0.458187	higher
71	gene coexpression	AD-realted	Cluster4	mis	0.651486	0.103358	0.41403	285	(0.5, 2.5, 0.1)	0	0	entorhinal	1	0	0.458187	higher
72	gene coexpression	AD-realted	Cluster5	syn	0.651486	0.103358	0.41403	285	(0.5, 2.5, 0.1)	1	0	entorhinal	1	1	0.458187	higher
73	gene coexpression				0.651486	0.103358	0.41403	285	(0.5, 2.5, 0.1)	0	1	entorhinal	1	0	0.458187	higher
74	gene coexpression	AD-realted	Cluster5	clear	0.651486	0.103358	0.41403	285	(0.5, 2.5, 0.1)	0	0	entorhinal	1	0	0.458187	higher
75	gene coexpression	AD-realted	Cluster5	mis	0.651486	0.103358	0.41403	285	(0.5, 2.5, 0.1)	0	0	entorhinal	1	0	0.458187	higher
76	gene coexpression	AD-realted	Cluster4	syn	0.651486	0.103358	0.41403	285	(0.5, 2.5, 0.1)	1	0	entorhinal	1	1	0.458187	higher
77	gene coexpression	AD-realted	Cluster7	spread	0.651486	0.103358	0.41403	285	(0.5, 2.5, 0.1)	0	0	entorhinal	1	0	0.458187	higher
78	gene coexpression	AD-realted	Cluster5	spread	0.651486	0.103358	0.41403	285	(0.5, 2.5, 0.1)	0	0	entorhinal	1	0	0.458187	higher
79	gene coexpression	AD-realted	Cluster7	syn	0.651486	0.103358	0.41403	285	(0.5, 2.5, 0.1)	1	0	entorhinal	1	1	0.458187	higher
80	gene coexpression	AD-realted	Cluster6	clear	0.651486	0.103358	0.41403	285	(0.5, 2.5, 0.1)	0	0	entorhinal	1	0	0.458187	higher
81	gene coexpression	AD-realted	Cluster4	spread	0.651486	0.103358	0.41403	285	(0.5, 2.5, 0.1)	0	0	entorhinal	1	0	0.458187	higher
82	gene coexpression	AD-realted	Cluster6	spread	0.651486	0.103358	0.41403	285	(0.5, 2.5, 0.1)	0	0	entorhinal	1	0	0.458187	higher
83	gene coexpression	AD-realted	Cluster7	mis	0.651486	0.103358	0.41403	285	(0.5, 2.5, 0.1)	0	0	entorhinal	1	0	0.458187	higher
84	gene coexpression	AD-realted	Cluster6	mis	0.651486	0.103358	0.41403	285	(0.5, 2.5, 0.1)	0	0	entorhinal	1	0	0.458187	higher
85	gene coexpression	Receptors	5HT4	mis	0.648943	0.158468	0.101416	29999	(0.9, 0.9, 1)	1	0	precuneus	0	1	0.354659	higher
86	gene coexpression	Receptors	5HT4	syn	0.645766	0.135887	0.31057	186	(0.5, 2.5, 0.1)	0	0	precuneus	0	0	0.354659	higher
87	gene coexpression	Receptors	M1	mis	0.645188	0.136464	0.215273	141	(0.3, 3, 0.3)	0	0	entorhinal	1	0	0.458187	higher
88	gene coexpression	Receptors	D2	spread	0.644156	0.0947779	0.371384	488	(0.01, 2.9, 0.1)	0	0	precuneus	0	0	0.354659	higher
89	gene coexpression	metabolism	cbf	clear	0.643613	0.102446	0.386458	29999	(0.9, 1.5, 0.1)	1	0	entorhinal	0	1	0.458187	higher
90	gene coexpression	Receptors	NET	spread	0.64271	0.0946116	0.380042	284	(0.5, 2.9, 0.1)	1	0	entorhinal	1	1	0.458187	higher
91	gene coexpression	AD-realted	Abeta	spread	0.642176	0.105683	0.391137	247	(0.5, 3, 0.1)	1	0	entorhinal	1	1	0.458187	higher
92	gene coexpression	Receptors	5HT1a	syn	0.641313	0.111819	0.400858	174	(0.01, 1.9, 1)	0	0	entorhinal	0	1	0.458187	higher
93	gene coexpression	Receptors	5HT2a	mis	0.638792	0.153284	0.0996648	74	(0.5, 3, 0.9)	0	0	entorhinal	1	0	0.458187	higher
94	gene coexpression	metabolism	cmr02	spread	0.635048	0.101776	0.363917	278	(0.5, 3, 0.1)	1	0	entorhinal	1	1	0.458187	higher
95	gene coexpression	metabolism	cbv	syn	0.634048	0.0817748	0.201413	83	(0.01, 3, 1)	0	0	entorhinal	1	0	0.458187	higher
96	gene coexpression	Receptors	5HT6	syn	0.629082	0.0828999	0.27969	70	(0.01, 3, 1)	0	0	entorhinal	1	0	0.458187	higher
97	gene coexpression	Celltype	Astro	syn	0.625999	0.113353	0.269555	81	(0.05, 3, 1)	0	0	entorhinal	1	0	0.458187	higher
98	gene coexpression	Celltype	Neuro-Ex	spread	0.623335	0.1044	0.358495	324	(0.5, 2.5, 0.1)	1	0	entorhinal	1	1	0.458187	higher
99	gene coexpression	Receptors	A4B2	clear	0.620112	0.11703	0.14811	82	(0.01, 3, 1)	1	0	entorhinal	1	1	0.458187	higher
100	gene coexpression	AD-realted	MAPT	spread	0.618262	0.101371	0.334019	2731	(0.01, 1.5, 0.1)	0	0	precuneus	0	1	0.354659	higher
101	gene coexpression	Celltype	Endo	clear	0.616618	0.197174	0.0154837	42	(0.01, 1.9, 1)	1	0	entorhinal	1	1	0.458187	higher
102	gene coexpression	Receptors	NET	clear	0.616598	0.0859038	0.18056	161	(0.3, 3, 1)	0	0	entorhinal	1	0	0.458187	higher
103	gene coexpression	Celltype	OPC	syn	0.613923	0.106076	0.259156	85	(0.05, 3, 1)	0	0	entorhinal	1	0	0.458187	higher
104	gene coexpression	Receptors	5HT1a	spread	0.608056	0.103446	0.326996	568	(0.1, 2.5, 0.1)	0	0	precuneus	0	0	0.354659	higher
105	gene coexpression	Receptors	DAT	spread	0.605677	0.117991	0.321256	372	(0.3, 3, 0.1)	1	0	entorhinal	1	1	0.458187	higher
106	gene coexpression	Celltype	Oligo	clear	0.602203	0.113077	0.201253	71	(0.01, 3, 1)	1	0	entorhinal	1	1	0.458187	higher
107	gene coexpression	Receptors	CB1	spread	0.602064	0.114472	0.332281	274	(0.5, 2.9, 0.1)	1	0	entorhinal	1	1	0.458187	higher
108	gene coexpression	Receptors	H3	clear	0.600736	0.155095	0.139954	64	(0.7, 3, 1)	1	0	entorhinal	1	1	0.458187	higher
109	gene coexpression	AD-realted	Abeta	syn	0.596167	0.115049	0.320943	55	(0.01, 3, 1)	0	0	entorhinal	1	0	0.458187	higher
110	gene coexpression	Receptors	D1	spread	0.593754	0.1089	0.309068	309	(0.5, 2.9, 0.1)	1	0	entorhinal	1	1	0.458187	higher
111	gene coexpression	Celltype	Neuro-In	spread	0.591343	0.110113	0.304759	299	(0.5, 2.9, 0.1)	1	0	entorhinal	1	1	0.458187	higher
112	gene coexpression	metabolism	cmrglc	clear	0.590448	0.146455	0.29542	29999	(0.7, 3, 1)	1	0	entorhinal	0	1	0.458187	higher
113	gene coexpression	Receptors	NMDA	spread	0.590145	0.118099	0.311716	300	(0.5, 2.9, 0.1)	1	0	entorhinal	1	1	0.458187	higher
114	gene coexpression	Celltype	Micro	syn	0.587393	0.0995171	0.105463	82	(0.01, 2.9, 1)	0	0	entorhinal	1	0	0.458187	higher
115	gene coexpression	Cortical expansion	devexp	syn	0.58738	0.145955	-0.0168916	10553	(0.9, 0.5, 0.1)	1	0	entorhinal	1	1	0.458187	higher
116	gene coexpression	Receptors	NET	clear	0.586725	0.118375	0.165	363	(0.3, 1.9, 1)	1	0	precuneus	0	0	0.354659	higher
117	gene coexpression	Cortical expansion	devexp	spread	0.584603	0.115282	0.288764	275	(0.5, 2.9, 0.1)	0	0	entorhinal	1	0	0.458187	higher
118	gene coexpression	Celltype	Oligo	clear	0.578675	0.101607	0.165942	67	(0.5, 3, 1)	1	0	precuneus	0	1	0.354659	higher
119	gene coexpression	Cortical expansion	devexp	mis	0.567407	0.167792	-0.0571153	278	(0.3, 3, 0.1)	0	0	entorhinal	1	0	0.458187	higher
120	gene coexpression	Microstructure	thickness	spread	0.5654	0.121004	0.278124	507	(0.01, 2.9, 0.1)	0	0	precuneus	0	0	0.354659	higher
121	gene coexpression	Celltype	Endo	syn	0.564767	0.0901919	0.13073	115	(0.05, 2, 1)	0	0	entorhinal	1	0	0.458187	higher
122	gene coexpression	Receptors	5HTT	spread	0.561133	0.108036	0.227579	404	(0.5, 2.5, 0.1)	0	0	entorhinal	1	0	0.458187	higher
123	gene coexpression	metabolism	cbv	mis	0.560688	0.182374	0.0255436	116	(0.5, 3, 1)	0	0	entorhinal	1	0	0.458187	higher
124	gene coexpression	Receptors	GABAa	clear	0.560526	0.0946631	0.0303117	89	(0.01, 3, 1)	1	0	entorhinal	1	1	0.458187	higher
125	gene coexpression	Receptors	MOR	spread	0.558352	0.119894	0.26061	291	(0.5, 2.9, 0.1)	1	0	entorhinal	1	1	0.458187	higher
126	gene coexpression	Receptors	NMDA	syn	0.554788	0.100935	0.111383	240	(0.05, 1.5, 0.5)	0	0	entorhinal	1	0	0.458187	higher
127	gene coexpression	Celltype	Endo	spread	0.55473	0.115873	0.215748	305	(0.5, 2.9, 0.1)	0	0	entorhinal	1	0	0.458187	higher
128	gene coexpression	metabolism	cmrglc	spread	0.554476	0.111065	0.17909	282	(0.5, 3, 0.1)	0	0	entorhinal	1	0	0.458187	higher
129	gene coexpression	Receptors	mGluR5	spread	0.554335	0.113842	0.238332	288	(0.5, 3, 0.1)	1	0	entorhinal	1	1	0.458187	higher
130	gene coexpression	metabolism	cbf	spread	0.554306	0.0949021	0.122911	312	(0.7, 2.5, 0.1)	0	0	entorhinal	1	0	0.458187	higher
131	gene coexpression	Receptors	5HTT	syn	0.552599	0.137645	0.158099	477	(0.01, 0.9, 1)	0	0	entorhinal	1	0	0.458187	higher
132	gene coexpression	metabolism	cmr02	clear	0.551944	0.194505	0.219767	29999	(0.7, 3, 1)	0	0	entorhinal	1	0	0.458187	higher
133	gene coexpression	Celltype	Neuro-Ex	syn	0.551594	0.0921797	0.122749	91	(0.01, 3, 1)	0	0	entorhinal	1	0	0.458187	higher
134	gene coexpression	Cortical expansion	devexp	mis	0.547266	0.206829	-0.23277	354	(0.5, 3, 0.1)	1	0	precuneus	0	0	0.354659	higher
135	gene coexpression	Receptors	VAChT	syn	0.546835	0.0844243	-0.0718035	457	(0.1, 0.9, 1)	0	0	entorhinal	1	0	0.458187	higher
136	gene coexpression	Receptors	GABAa	spread	0.543845	0.115197	0.21654	306	(0.5, 2.9, 0.1)	0	0	entorhinal	1	0	0.458187	higher
137	gene coexpression	Celltype	Astro	mis	0.540664	0.234889	-0.218869	91	(0.7, 3, 1)	0	0	entorhinal	1	0	0.458187	higher
138	gene coexpression	AD-realted	APOE	clear	0.540278	0.197657	0.258281	29999	(0.9, 3, 1)	0	0	entorhinal	1	0	0.458187	higher
139	gene coexpression	AD-realted	Abeta	mis	0.537065	0.119674	0.203021	70	(0.1, 3, 1)	0	0	entorhinal	1	0	0.458187	higher
140	gene coexpression	metabolism	cmr02	clear	0.534258	0.125733	0.083061	35	(0.01, 3, 1)	1	0	precuneus	0	0	0.354659	higher
141	gene coexpression	Receptors	5HT4	spread	0.532753	0.130402	0.228137	846	(0.1, 2, 0.1)	0	0	precuneus	0	0	0.354659	higher
142	gene coexpression	Receptors	DAT	syn	0.528795	0.126637	0.180914	214	(0.01, 1.9, 0.7)	1	0	precuneus	1	0	0.354659	higher
143	gene coexpression	Celltype	Oligo	spread	0.526414	0.123226	0.127826	337	(0.5, 2.5, 0.1)	0	0	entorhinal	1	0	0.458187	higher
144	gene coexpression	Receptors	5HTT	syn	0.525373	0.117588	0.0280219	280	(0.01, 1.5, 1)	1	0	precuneus	0	0	0.354659	higher
145	gene coexpression	Celltype	OPC	mis	0.5239	0.262115	-0.4564	181	(0.9, 2.9, 0.1)	0	0	entorhinal	1	0	0.458187	higher
146	gene coexpression	Receptors	GABAa	clear	0.523514	0.0899127	-0.0930927	448	(0.01, 1.5, 0.3)	1	0	precuneus	0	1	0.354659	higher
147	gene coexpression	Cortical expansion	devexp	syn	0.51679	0.16015	-0.33332	19569	(0.9, 0.5, 0.1)	0	0	precuneus	0	1	0.354659	higher
148	gene coexpression	Receptors	CB1	syn	0.516618	0.121103	0.163248	115	(0.01, 1.5, 1)	0	0	entorhinal	1	0	0.458187	higher
149	gene coexpression	AD-realted	APOE	clear	0.513854	0.146958	0.0117741	35	(0.01, 2.9, 1)	1	0	precuneus	0	0	0.354659	higher
150	gene coexpression	Cortical expansion	scalinghcp	spread	0.51375	0.179044	0.175143	29999	(0.9, 2.5, 1)	1	0	precuneus	0	0	0.354659	higher
151	gene coexpression	Receptors	D1	syn	0.513256	0.149	0.178784	150	(0.01, 1.5, 1)	0	0	entorhinal	1	0	0.458187	higher
152	gene coexpression	Receptors	DAT	syn	0.504471	0.117674	0.023987	345	(0.01, 0.9, 1)	0	0	entorhinal	0	0	0.458187	higher
153	gene coexpression	Receptors	5HT6	mis	0.504399	0.125554	-0.104427	90	(0.01, 3, 1)	0	0	entorhinal	1	0	0.458187	higher
154	gene coexpression	Receptors	H3	syn	0.50289	0.0857944	-0.222147	360	(0.1, 0.9, 1)	0	0	entorhinal	1	0	0.458187	higher
155	gene coexpression	Celltype	Neuro-In	syn	0.500052	0.107389	0.0423825	115	(0.01, 2, 1)	0	0	entorhinal	1	0	0.458187	higher
156	gene coexpression	Receptors	DAT	spread	0.498951	0.111445	0.0712348	821	(0.01, 2.5, 0.1)	0	0	precuneus	0	1	0.354659	higher
157	gene coexpression	Receptors	5HT2a	spread	0.495053	0.166127	0.165423	29999	(0.9, 3, 1)	1	0	precuneus	0	1	0.354659	higher
158	gene coexpression	Receptors	mGluR5	syn	0.492663	0.100137	-0.0221873	138	(0.01, 1.5, 1)	0	0	entorhinal	1	0	0.458187	higher
159	gene coexpression	Receptors	5HT2a	mis	0.491174	0.200883	-0.541593	487	(0.3, 3, 0.1)	0	0	precuneus	0	0	0.354659	higher
160	gene coexpression	Microstructure	myelinmap	spread	0.486036	0.14408	0.128527	29999	(0.9, 3, 1)	1	0	precuneus	0	1	0.354659	higher
161	gene coexpression	Microstructure	myelinmap	clear	0.485088	0.245938	0.157482	29999	(0.9, 3, 1)	0	0	entorhinal	1	0	0.458187	higher
162	gene coexpression	Microstructure	myelinmap	clear	0.485071	0.245991	0.157468	29999	(0.9, 3, 1)	0	0	precuneus	0	0	0.354659	higher
163	gene coexpression	Receptors	VAChT	spread	0.484261	0.133681	0.129504	313	(0.5, 3, 0.1)	0	0	entorhinal	1	0	0.458187	higher
164	gene coexpression	Receptors	A4B2	spread	0.478403	0.126363	0.0956148	287	(0.5, 3, 0.1)	0	0	entorhinal	1	0	0.458187	higher
165	gene coexpression	Receptors	MOR	syn	0.475821	0.101081	-0.0861139	182	(0.01, 1, 1)	0	0	entorhinal	1	0	0.458187	higher
166	gene coexpression	AD-realted	Abeta	spread	0.475309	0.133541	0.0794633	29999	(0.9, 3, 1)	1	0	precuneus	0	1	0.354659	higher
167	gene coexpression	Receptors	DAT	mis	0.472094	0.145389	0.133927	5201	(0.01, 1.5, 0.3)	0	0	precuneus	1	0	0.354659	higher
168	gene coexpression	Receptors	5HT1b	spread	0.470921	0.124893	0.0698868	296	(0.5, 3, 0.1)	0	0	entorhinal	1	0	0.458187	higher
169	gene coexpression	Receptors	DAT	mis	0.46944	0.159835	0.151006	29999	(0.01, 2, 1)	0	0	entorhinal	0	0	0.458187	higher
170	gene coexpression	Microstructure	genepc1	clear	0.462471	0.172274	0.114456	125	(0.7, 3, 1)	0	0	entorhinal	1	0	0.458187	higher
171	gene coexpression	Receptors	M1	mis	0.461849	0.176766	-0.571183	706	(0.05, 3, 0.1)	1	0	precuneus	0	0	0.354659	higher
172	gene coexpression	Receptors	H3	spread	0.456763	0.133103	0.0661554	306	(0.5, 3, 0.1)	0	0	entorhinal	1	0	0.458187	lower
173	gene coexpression	AD-realted	APOE	spread	0.455005	0.13261	-0.0323018	29999	(0.9, 3, 1)	0	0	precuneus	0	1	0.354659	higher
174	gene coexpression	Receptors	VAChT	syn	0.454416	0.108239	-0.222897	4251	(0.3, 0.9, 1)	1	0	precuneus	0	0	0.354659	higher
175	gene coexpression	Microstructure	genepc1	clear	0.453529	0.292222	0.133122	29999	(0.7, 3, 1)	1	0	precuneus	0	0	0.354659	higher
176	gene coexpression	Receptors	D1	syn	0.451975	0.153607	0.0567704	2102	(0.01, 1.5, 0.1)	1	0	precuneus	0	0	0.354659	higher
177	gene coexpression	Celltype	Astro	syn	0.450001	0.140587	-0.188104	894	(0.01, 2, 0.1)	1	0	precuneus	0	0	0.354659	higher
178	gene coexpression	Receptors	5HT2a	syn	0.449443	0.223674	-0.802369	456	(0.9, 0.9, 0.1)	0	0	precuneus	0	0	0.354659	higher
179	gene coexpression	Celltype	Micro	mis	0.444875	0.132595	-0.0928009	166	(0.01, 2, 1)	0	0	entorhinal	1	0	0.458187	lower
180	gene coexpression	Receptors	GABAa	spread	0.442806	0.160566	0.103815	29999	(0.9, 3, 1)	0	0	precuneus	0	0	0.354659	higher
181	gene coexpression	Celltype	OPC	syn	0.437895	0.196516	-0.0734469	1255	(0.7, 2, 0.1)	1	0	precuneus	0	0	0.354659	higher
182	gene coexpression	Receptors	NMDA	mis	0.435957	0.154562	0.0740677	110	(0.01, 2.9, 1)	0	0	entorhinal	1	0	0.458187	lower
183	gene coexpression	Receptors	H3	syn	0.435001	0.261212	-0.0785449	29999	(0.3, 1.5, 1)	1	0	precuneus	0	0	0.354659	higher
184	gene coexpression	Receptors	GABAa	syn	0.43447	0.108273	-0.317431	116	(0.01, 1.9, 1)	0	0	entorhinal	1	0	0.458187	lower
185	gene coexpression	Receptors	CB1	mis	0.43125	0.122347	-0.0818893	1576	(0.01, 1.5, 0.1)	0	0	entorhinal	1	0	0.458187	lower
186	gene coexpression	Cortical expansion	scaling	spread	0.430963	0.166375	0.0161192	29999	(0.9, 3, 1)	1	0	precuneus	0	0	0.354659	higher
187	gene coexpression	Celltype	Oligo	syn	0.428016	0.103404	-0.35475	142	(0.01, 1.5, 1)	0	0	entorhinal	1	0	0.458187	lower
188	gene coexpression	Cortical expansion	scalingnih	syn	0.423905	0.120625	-0.171864	466	(0.01, 2.5, 0.1)	1	0	precuneus	0	1	0.354659	higher
189	gene coexpression	Cortical expansion	scalingnih	mis	0.4207	0.135905	-0.0238452	1016	(0.9, 1.5, 0.1)	0	0	precuneus	0	0	0.354659	higher
190	gene coexpression	Cortical expansion	scalinghcp	mis	0.42067	0.168349	-0.260648	3118	(0.9, 1, 0.1)	0	0	precuneus	0	0	0.354659	higher
191	gene coexpression	Receptors	M1	spread	0.415518	0.124888	-0.115701	29999	(0.9, 3, 1)	0	0	precuneus	0	0	0.354659	higher
192	gene coexpression	Receptors	D1	spread	0.413755	0.154495	0.0212278	849	(0.05, 2.5, 0.1)	0	0	precuneus	0	1	0.354659	higher
193	gene coexpression	Receptors	NET	syn	0.412213	0.12725	-0.376627	69	(0.01, 3, 1)	0	0	entorhinal	1	0	0.458187	lower
194	gene coexpression	Receptors	A4B2	syn	0.406639	0.102477	-0.760871	324	(0.01, 0.9, 1)	0	0	entorhinal	1	0	0.458187	lower
195	gene coexpression	Celltype	Astro	mis	0.40581	0.147687	-0.187296	29999	(0.5, 3, 1)	0	0	precuneus	0	0	0.354659	higher
196	gene coexpression	Receptors	NMDA	clear	0.404766	0.246957	-0.458434	44	(0.01, 3, 1)	0	0	entorhinal	1	0	0.458187	lower
197	gene coexpression	Celltype	Neuro-In	clear	0.404595	0.20225	-0.383527	77	(0.01, 1, 1)	0	0	entorhinal	1	0	0.458187	lower
198	gene coexpression	Cortical expansion	evoexp	mis	0.40393	0.1568	-0.0761818	696	(0.05, 3, 0.1)	1	0	precuneus	0	0	0.354659	higher
199	gene coexpression	Celltype	Endo	mis	0.403263	0.21609	-0.440867	98	(0.5, 3, 1)	0	0	entorhinal	1	0	0.458187	lower
200	gene coexpression	Celltype	OPC	mis	0.401268	0.144121	-0.0375116	29999	(0.7, 2, 1)	0	0	precuneus	0	0	0.354659	higher
201	gene coexpression	Receptors	mGluR5	clear	0.401242	0.24151	-0.311411	59	(0.5, 3, 1)	0	0	entorhinal	1	0	0.458187	lower
202	gene coexpression	Cortical expansion	evoexp	syn	0.398954	0.144744	-0.0848726	540	(0.1, 2, 0.1)	0	0	precuneus	0	1	0.354659	higher
203	gene coexpression	Celltype	Neuro-Ex	clear	0.393891	0.240348	-0.549165	52	(0.01, 1.5, 1)	0	0	entorhinal	1	0	0.458187	lower
204	gene coexpression	Microstructure	myelinmap	syn	0.388179	0.191682	-0.55676	68	(0.3, 3, 1)	0	0	entorhinal	1	0	0.458187	lower
205	gene coexpression	Celltype	Astro	spread	0.38325	0.13203	-0.251885	772	(0.01, 2.5, 0.1)	0	0	precuneus	0	1	0.354659	higher
206	gene coexpression	Receptors	CB1	spread	0.380804	0.147087	-0.0785285	539	(0.01, 3, 0.1)	1	0	precuneus	0	1	0.354659	higher
207	gene coexpression	Receptors	CB1	syn	0.379011	0.171473	-0.0167685	1135	(0.01, 1.5, 0.1)	0	0	precuneus	0	0	0.354659	higher
208	gene coexpression	Receptors	mGluR5	syn	0.378775	0.231755	-0.0514976	2827	(0.5, 1, 0.1)	1	0	precuneus	0	0	0.354659	higher
209	gene coexpression	Receptors	5HT6	clear	0.377292	0.151044	-0.458492	82	(0.3, 3, 1)	0	0	entorhinal	1	0	0.458187	lower
210	gene coexpression	Receptors	mGluR5	mis	0.376837	0.134187	-0.274483	2186	(0.01, 1.5, 0.1)	0	0	entorhinal	1	0	0.458187	lower
211	gene coexpression	Celltype	Neuro-Ex	mis	0.371344	0.162224	-0.371256	103	(0.01, 3, 1)	0	0	entorhinal	1	0	0.458187	lower
212	gene coexpression	Cortical expansion	scaling	mis	0.369994	0.146266	-0.224352	29999	(0.9, 1, 1)	0	0	precuneus	0	0	0.354659	higher
213	gene coexpression	AD-realted	Abeta	mis	0.369763	0.285717	0.0445131	29999	(0.9, 3, 0.7)	0	0	precuneus	0	0	0.354659	higher
214	gene coexpression	Receptors	5HT1b	syn	0.369619	0.109358	-1.20607	368	(0.01, 0.9, 1)	0	0	entorhinal	1	0	0.458187	lower
215	gene coexpression	Receptors	D1	mis	0.368999	0.147432	-0.120216	810	(0.01, 2.5, 1)	0	0	entorhinal	1	0	0.458187	lower
216	gene coexpression	Receptors	CB1	mis	0.368503	0.256687	0.0222796	29999	(0.5, 2.5, 1)	0	0	precuneus	0	0	0.354659	higher
217	gene coexpression	Receptors	D1	mis	0.368101	0.148233	-0.117206	879	(0.01, 2.5, 1)	0	0	precuneus	0	0	0.354659	higher
218	gene coexpression	Cortical expansion	scalingnih	spread	0.36353	0.143391	-0.150424	1304	(0.01, 1.9, 0.1)	0	0	precuneus	0	0	0.354659	higher
219	gene coexpression	AD-realted	Abeta	syn	0.362012	0.366948	-0.131868	29999	(0.9, 3, 0.1)	0	0	precuneus	0	0	0.354659	higher
220	gene coexpression	Receptors	A4B2	clear	0.358551	0.172006	-0.054681	29999	(0.9, 0.5, 1)	1	0	precuneus	0	1	0.354659	higher
221	gene coexpression	Receptors	M1	clear	0.35855	0.157981	-0.362658	98	(0.01, 3, 1)	0	0	entorhinal	1	0	0.458187	lower
222	gene coexpression	Celltype	Endo	clear	0.358446	0.170163	-0.0550076	79	(0.7, 3, 0.3)	1	0	precuneus	0	1	0.354659	higher
223	gene coexpression	Receptors	MOR	mis	0.355252	0.273475	-0.0103396	29999	(0.3, 3, 1)	0	0	entorhinal	1	0	0.458187	lower
224	gene coexpression	Receptors	MOR	mis	0.355214	0.273483	-0.0103891	29999	(0.3, 3, 1)	1	0	precuneus	0	0	0.354659	higher
225	gene coexpression	Receptors	MOR	syn	0.354719	0.231213	-0.0720609	611	(0.01, 3, 0.1)	0	0	precuneus	0	0	0.354659	higher
226	gene coexpression	Receptors	MOR	spread	0.351782	0.338437	-0.0642412	4694	(0.1, 3, 0.1)	0	0	precuneus	0	1	0.354659	lower
227	gene coexpression	Microstructure	myelinmap	mis	0.346134	0.299978	-0.744715	127	(0.9, 3, 0.5)	0	0	entorhinal	1	0	0.458187	lower
228	gene coexpression	Celltype	OPC	spread	0.341594	0.141468	-0.271763	759	(0.01, 2.5, 0.1)	0	0	precuneus	0	1	0.354659	lower
229	gene coexpression	Cortical expansion	scalinghcp	syn	0.333302	0.147945	-0.211919	917	(0.7, 0.9, 0.1)	0	0	precuneus	0	1	0.354659	lower
230	gene coexpression	metabolism	cbv	spread	0.328891	0.166191	-0.23799	29999	(0.9, 3, 1)	1	0	precuneus	0	1	0.354659	lower
231	gene coexpression	Cortical expansion	evoexp	spread	0.322204	0.160443	-0.178831	655	(0.01, 2.5, 0.1)	0	0	precuneus	0	0	0.354659	lower
232	gene coexpression	metabolism	cmr02	syn	0.320647	0.195014	-0.955543	68	(0.01, 3, 1)	0	0	entorhinal	1	0	0.458187	lower
233	gene coexpression	Receptors	5HT2a	clear	0.319909	0.263148	-0.29019	29999	(0.5, 0.1, 1)	0	0	entorhinal	1	0	0.458187	lower
234	gene coexpression	Receptors	5HT2a	clear	0.319864	0.263203	-0.290809	29999	(0.5, 0.1, 0.5)	0	0	precuneus	0	0	0.354659	lower
235	gene coexpression	Celltype	Micro	clear	0.312182	0.181976	-0.609966	163	(0.01, 0.5, 1)	0	0	entorhinal	1	0	0.458187	lower
236	gene coexpression	Receptors	5HTT	mis	0.310443	0.212767	-0.347133	1702	(0.01, 1.5, 1)	0	0	entorhinal	1	0	0.458187	lower
237	gene coexpression	Celltype	Neuro-In	mis	0.310072	0.173955	-0.553105	122	(0.01, 2.5, 1)	0	0	entorhinal	1	0	0.458187	lower
238	gene coexpression	metabolism	cbf	syn	0.309569	0.180491	-0.894411	67	(0.01, 3, 1)	0	0	entorhinal	1	0	0.458187	lower
239	gene coexpression	Celltype	OPC	clear	0.300436	0.229092	-0.852039	155	(0.01, 0.5, 1)	0	0	entorhinal	1	0	0.458187	lower
240	gene coexpression	Cortical expansion	evoexp	clear	0.30024	0.288968	-0.500449	71	(0.01, 1, 1)	0	0	entorhinal	1	0	0.458187	lower
241	gene coexpression	Receptors	5HT6	spread	0.298913	0.145726	-0.346402	839	(0.01, 2.5, 0.1)	1	0	precuneus	0	1	0.354659	lower
242	gene coexpression	Receptors	M1	syn	0.298529	0.145457	-0.348219	631	(0.1, 2, 0.1)	0	0	precuneus	0	1	0.354659	lower
243	gene coexpression	Cortical expansion	scaling	syn	0.296204	0.154899	-0.291181	629	(0.9, 0.9, 0.1)	0	0	precuneus	0	1	0.354659	lower
244	gene coexpression	metabolism	cmrglc	syn	0.295453	0.207829	-1.01952	64	(0.01, 3, 1)	0	0	entorhinal	1	0	0.458187	lower
245	gene coexpression	Microstructure	genepc1	syn	0.293227	0.261498	-0.999565	64	(0.01, 3, 1)	0	0	entorhinal	1	0	0.458187	lower
246	gene coexpression	Cortical expansion	devexp	clear	0.291699	0.283916	-0.559268	102	(0.01, 0.5, 1)	0	0	entorhinal	1	0	0.458187	lower
247	gene coexpression	Receptors	NET	spread	0.290104	0.141495	-0.414187	29999	(0.9, 3, 1)	0	0	precuneus	0	1	0.354659	lower
248	gene coexpression	Celltype	Micro	syn	0.289117	0.148423	-0.735987	857	(0.05, 2, 0.1)	1	0	precuneus	0	0	0.354659	lower
249	gene coexpression	Receptors	DAT	clear	0.288514	0.276552	-0.942171	30	(0.01, 3, 1)	0	0	entorhinal	1	0	0.458187	lower
250	gene coexpression	Celltype	Astro	clear	0.283923	0.240544	-0.897131	155	(0.01, 0.5, 1)	0	0	entorhinal	1	0	0.458187	lower
251	gene coexpression	Receptors	5HTT	mis	0.283434	0.214991	-0.306081	452	(0.01, 3, 1)	0	0	precuneus	0	0	0.354659	lower
252	gene coexpression	Cortical expansion	scalingpnc	clear	0.28293	0.225478	-0.41044	74	(0.1, 3, 1)	0	0	entorhinal	1	0	0.458187	lower
253	gene coexpression	metabolism	cmr02	mis	0.281877	0.27429	-1.00865	75	(0.3, 3, 1)	0	0	entorhinal	1	0	0.458187	lower
254	gene coexpression	Microstructure	genepc1	mis	0.279835	0.315162	-0.957748	82	(0.7, 3, 1)	0	0	entorhinal	1	0	0.458187	lower
255	gene coexpression	AD-realted	Abeta	clear	0.271825	0.295523	-0.778198	239	(0.01, 0.1, 1)	0	0	entorhinal	1	0	0.458187	lower
256	gene coexpression	Cortical expansion	scaling	clear	0.268445	0.286417	-0.776521	1380	(0.01, 0.1, 1)	0	0	entorhinal	1	0	0.458187	lower
257	gene coexpression	Cortical expansion	scalinghcp	clear	0.266441	0.288502	-0.813416	2144	(0.01, 0.1, 1)	0	0	entorhinal	1	0	0.458187	lower
258	gene coexpression	AD-realted	APOE	syn	0.265896	0.270261	-1.11265	62	(0.01, 3, 1)	0	0	entorhinal	1	0	0.458187	lower
259	gene coexpression	Receptors	MOR	clear	0.26587	0.32655	-1.05077	33	(0.01, 3, 1)	0	0	entorhinal	1	0	0.458187	lower
260	gene coexpression	Celltype	Micro	mis	0.26349	0.208869	-0.864952	1785	(0.1, 2, 0.1)	0	0	precuneus	0	0	0.354659	lower
261	gene coexpression	Receptors	H3	mis	0.262815	0.252317	-0.851549	2974	(0.01, 1, 1)	0	0	entorhinal	1	0	0.458187	lower
262	gene coexpression	Receptors	NMDA	spread	0.262058	0.135333	-0.697088	935	(0.01, 2.5, 0.1)	1	0	precuneus	0	1	0.354659	lower
263	gene coexpression	Receptors	mGluR5	spread	0.261839	0.184478	-0.259826	880	(0.01, 2.5, 0.1)	0	0	precuneus	0	1	0.354659	lower
264	gene coexpression	Cortical expansion	devexp	spread	0.261442	0.167156	-0.32913	978	(0.1, 2, 0.1)	0	0	precuneus	0	0	0.354659	lower
265	gene coexpression	Cortical expansion	scalingnih	clear	0.259418	0.296347	-0.827834	359	(0.01, 0.1, 1)	0	0	entorhinal	1	0	0.458187	lower
266	gene coexpression	Receptors	GABAa	mis	0.258165	0.259918	-0.784634	157	(0.01, 1.5, 1)	0	0	entorhinal	1	0	0.458187	lower
267	gene coexpression	Celltype	Oligo	mis	0.257437	0.289431	-0.986333	141	(0.01, 1.5, 1)	0	0	entorhinal	1	0	0.458187	lower
268	gene coexpression	AD-realted	APOE	mis	0.254929	0.304253	-1.02503	61	(0.1, 3, 1)	0	0	entorhinal	1	0	0.458187	lower
269	gene coexpression	Receptors	VAChT	mis	0.25471	0.296326	-0.894843	29999	(0.01, 1, 0.1)	0	0	entorhinal	1	0	0.458187	lower
270	gene coexpression	metabolism	cmr02	spread	0.254636	0.154743	-0.506122	29999	(0.9, 3, 1)	0	0	precuneus	0	1	0.354659	lower
271	gene coexpression	Receptors	A4B2	mis	0.253565	0.279835	-0.986087	24366	(0.01, 1, 0.1)	0	0	entorhinal	1	0	0.458187	lower
272	gene coexpression	metabolism	cmrglc	mis	0.25238	0.310639	-0.988638	920	(0.01, 1, 0.1)	0	0	entorhinal	1	0	0.458187	lower
273	gene coexpression	Receptors	NET	mis	0.251398	0.308266	-0.946203	1264	(0.01, 0.9, 0.1)	0	0	entorhinal	1	0	0.458187	lower
274	gene coexpression	metabolism	cbf	mis	0.250589	0.316994	-0.972862	1618	(0.01, 0.5, 0.1)	0	0	entorhinal	1	0	0.458187	lower
275	gene coexpression	Receptors	5HT1b	mis	0.249146	0.314921	-0.962354	2250	(0.01, 0.5, 0.1)	0	0	entorhinal	1	0	0.458187	lower
276	gene coexpression	Receptors	D1	clear	0.247998	0.315782	-1.07366	71	(0.01, 0.9, 1)	0	0	entorhinal	1	0	0.458187	lower
277	gene coexpression	Receptors	CB1	clear	0.247421	0.325751	-0.964955	1022	(0.01, 0.1, 0.1)	0	0	entorhinal	1	0	0.458187	lower
278	gene coexpression	Receptors	5HT4	clear	0.245299	0.32658	-0.975229	1108	(0.01, 0.1, 0.1)	0	0	entorhinal	1	0	0.458187	lower
279	gene coexpression	Receptors	mGluR5	mis	0.244358	0.216095	-0.20306	29999	(0.5, 1.5, 1)	0	0	precuneus	0	0	0.354659	lower
280	gene coexpression	metabolism	cbv	clear	0.242997	0.395897	-0.153675	29999	(0.5, 3, 1)	0	0	entorhinal	1	0	0.458187	lower
281	gene coexpression	metabolism	cbv	clear	0.242854	0.39585	-0.153908	29999	(0.5, 3, 1)	0	0	precuneus	0	0	0.354659	lower
282	gene coexpression	Receptors	D2	clear	0.240711	0.343488	-1.02839	45	(0.9, 3, 0.1)	0	0	entorhinal	1	0	0.458187	lower
283	gene coexpression	AD-realted	MAPT	clear	0.237306	0.333298	-1.02675	1558	(0.01, 0.1, 0.1)	0	0	entorhinal	1	0	0.458187	lower
284	gene coexpression	Cortical expansion	scalingpnc	clear	0.237241	0.251118	-0.521835	1281	(0.01, 0.5, 1)	1	0	precuneus	0	0	0.354659	lower
285	gene coexpression	Microstructure	thickness	clear	0.235351	0.331743	-1.00639	965	(0.01, 0.1, 0.1)	0	0	entorhinal	1	0	0.458187	lower
286	gene coexpression	Receptors	5HT1a	clear	0.232173	0.337637	-1.03455	970	(0.01, 0.1, 0.1)	0	0	entorhinal	1	0	0.458187	lower
287	gene coexpression	metabolism	cmrglc	spread	0.23079	0.163797	-0.484658	29999	(0.9, 3, 1)	0	0	precuneus	0	0	0.354659	lower
288	gene coexpression	Receptors	A4B2	syn	0.23032	0.314807	-0.294359	29999	(0.1, 3, 1)	0	0	precuneus	0	0	0.354659	lower
289	gene coexpression	Cortical expansion	scalingpnc	spread	0.228814	0.21544	-0.276018	3211	(0.7, 1, 0.1)	0	0	precuneus	0	1	0.354659	lower
290	gene coexpression	AD-realted	Abeta	clear	0.221139	0.3354	-1.03182	2562	(0.7, 0.1, 0.1)	0	0	precuneus	0	0	0.354659	lower
291	gene coexpression	Receptors	H3	clear	0.2202	0.246621	-0.223754	29999	(0.9, 1, 1)	0	0	precuneus	0	1	0.354659	lower
292	gene coexpression	Receptors	VAChT	clear	0.215081	0.225396	-0.573071	57	(0.9, 3, 0.1)	0	0	precuneus	0	1	0.354659	lower
293	gene coexpression	Receptors	M1	clear	0.211669	0.255246	-0.79055	29999	(0.01, 3, 1)	0	0	precuneus	0	0	0.354659	lower
294	gene coexpression	Celltype	Micro	spread	0.20164	0.177769	-0.443597	855	(0.01, 2.5, 0.1)	0	0	precuneus	0	1	0.354659	lower
295	gene coexpression	Celltype	Neuro-Ex	clear	0.200885	0.172085	-0.487439	89	(0.01, 3, 1)	1	0	precuneus	0	0	0.354659	lower
296	gene coexpression	Celltype	Neuro-In	clear	0.200806	0.167691	-0.541033	96	(0.01, 2.5, 1)	1	0	precuneus	0	0	0.354659	lower
297	gene coexpression	Cortical expansion	scalingpnc	mis	0.191713	0.178993	-0.468622	565	(0.3, 3, 0.1)	0	0	precuneus	0	0	0.354659	lower
298	gene coexpression	Receptors	5HT6	clear	0.178671	0.339059	-0.831442	29999	(0.3, 3, 1)	0	0	precuneus	0	0	0.354659	lower
299	gene coexpression	Receptors	5HTT	spread	0.17845	0.160702	-0.680313	861	(0.01, 2.5, 0.1)	0	0	precuneus	0	0	0.354659	lower
300	gene coexpression	Celltype	Neuro-In	spread	0.178134	0.367941	-0.23013	29999	(0.9, 3, 1)	0	0	precuneus	0	1	0.354659	lower
301	gene coexpression	Receptors	5HT6	syn	0.168155	0.243549	-0.537163	1446	(0.05, 1.5, 0.1)	0	0	precuneus	0	0	0.354659	lower
302	gene coexpression	Receptors	5HT1b	spread	0.166469	0.165933	-0.664547	29999	(0.9, 3, 1)	0	0	precuneus	0	0	0.354659	lower
303	gene coexpression	Celltype	Neuro-Ex	spread	0.164749	0.399842	-0.271745	29999	(0.9, 3, 1)	0	0	precuneus	0	1	0.354659	lower
304	gene coexpression	AD-realted	Cluster5	syn	0.155298	0.198961	-0.593101	668	(0.01, 2.5, 0.1)	1	0	precuneus	0	1	0.354659	lower
305	gene coexpression	AD-realted	Cluster2	spread	0.155298	0.198961	-0.593101	668	(0.01, 2.5, 0.1)	0	0	precuneus	0	0	0.354659	lower
306	gene coexpression	AD-realted	Cluster6	syn	0.155298	0.198961	-0.593101	668	(0.01, 2.5, 0.1)	1	0	precuneus	0	1	0.354659	lower
307	gene coexpression	AD-realted	Cluster4	spread	0.155298	0.198961	-0.593101	668	(0.01, 2.5, 0.1)	0	0	precuneus	0	0	0.354659	lower
308	gene coexpression	AD-realted	Cluster4	mis	0.155298	0.198961	-0.593101	668	(0.01, 2.5, 0.1)	0	0	precuneus	0	0	0.354659	lower
309	gene coexpression	AD-realted	Cluster2	syn	0.155298	0.198961	-0.593101	668	(0.01, 2.5, 0.1)	1	0	precuneus	0	1	0.354659	lower
310	gene coexpression	AD-realted	Cluster6	spread	0.155298	0.198961	-0.593101	668	(0.01, 2.5, 0.1)	0	0	precuneus	0	0	0.354659	lower
311	gene coexpression	AD-realted	Cluster1	mis	0.155298	0.198961	-0.593101	668	(0.01, 2.5, 0.1)	0	0	precuneus	0	0	0.354659	lower
312	gene coexpression	AD-realted	Cluster1	spread	0.155298	0.198961	-0.593101	668	(0.01, 2.5, 0.1)	0	0	precuneus	0	0	0.354659	lower
313	gene coexpression	AD-realted	Cluster4	syn	0.155298	0.198961	-0.593101	668	(0.01, 2.5, 0.1)	1	0	precuneus	0	1	0.354659	lower
314	gene coexpression	AD-realted	Cluster1	clear	0.155298	0.198961	-0.593101	668	(0.01, 2.5, 0.1)	0	0	precuneus	0	0	0.354659	lower
315	gene coexpression	AD-realted	Cluster1	syn	0.155298	0.198961	-0.593101	668	(0.01, 2.5, 0.1)	1	0	precuneus	0	1	0.354659	lower
316	gene coexpression	AD-realted	Cluster5	clear	0.155298	0.198961	-0.593101	668	(0.01, 2.5, 0.1)	0	0	precuneus	0	0	0.354659	lower
317	gene coexpression	AD-realted	Cluster4	clear	0.155298	0.198961	-0.593101	668	(0.01, 2.5, 0.1)	0	0	precuneus	0	0	0.354659	lower
318	gene coexpression	AD-realted	Cluster6	clear	0.155298	0.198961	-0.593101	668	(0.01, 2.5, 0.1)	0	0	precuneus	0	0	0.354659	lower
319	gene coexpression	AD-realted	Cluster6	mis	0.155298	0.198961	-0.593101	668	(0.01, 2.5, 0.1)	0	0	precuneus	0	0	0.354659	lower
320	gene coexpression	AD-realted	Cluster5	mis	0.155298	0.198961	-0.593101	668	(0.01, 2.5, 0.1)	0	0	precuneus	0	0	0.354659	lower
321	gene coexpression	AD-realted	Cluster3	syn	0.155298	0.198961	-0.593101	668	(0.01, 2.5, 0.1)	1	0	precuneus	0	1	0.354659	lower
322	gene coexpression	AD-realted	Cluster5	spread	0.155298	0.198961	-0.593101	668	(0.01, 2.5, 0.1)	0	0	precuneus	0	0	0.354659	lower
323	gene coexpression	AD-realted	Cluster3	clear	0.155298	0.198961	-0.593101	668	(0.01, 2.5, 0.1)	0	0	precuneus	0	0	0.354659	lower
324	gene coexpression	AD-realted	Cluster3	spread	0.155298	0.198961	-0.593101	668	(0.01, 2.5, 0.1)	0	0	precuneus	0	0	0.354659	lower
325	gene coexpression	AD-realted	Cluster2	mis	0.155298	0.198961	-0.593101	668	(0.01, 2.5, 0.1)	0	0	precuneus	0	0	0.354659	lower
326	gene coexpression	AD-realted	Cluster2	clear	0.155298	0.198961	-0.593101	668	(0.01, 2.5, 0.1)	0	0	precuneus	0	0	0.354659	lower
327	gene coexpression	AD-realted	Cluster3	mis	0.155298	0.198961	-0.593101	668	(0.01, 2.5, 0.1)	0	0	precuneus	0	0	0.354659	lower
328	gene coexpression				0.155298	0.198961	-0.593101	668	(0.01, 2.5, 0.1)	0	1	precuneus	0	0	0.354659	lower
329	gene coexpression	AD-realted	Cluster7	clear	0.155298	0.198961	-0.593101	668	(0.01, 2.5, 0.1)	0	0	precuneus	0	0	0.354659	lower
330	gene coexpression	AD-realted	Cluster7	spread	0.155298	0.198961	-0.593101	668	(0.01, 2.5, 0.1)	0	0	precuneus	0	0	0.354659	lower
331	gene coexpression	AD-realted	Cluster7	syn	0.155298	0.198961	-0.593101	668	(0.01, 2.5, 0.1)	1	0	precuneus	0	1	0.354659	lower
332	gene coexpression	AD-realted	Cluster7	mis	0.155298	0.198961	-0.593101	668	(0.01, 2.5, 0.1)	0	0	precuneus	0	0	0.354659	lower
333	gene coexpression	Microstructure	genepc1	spread	0.1541	0.193552	-0.80964	29999	(0.9, 3, 1)	0	0	precuneus	0	1	0.354659	lower
334	gene coexpression	Cortical expansion	scalingpnc	syn	0.148672	0.18811	-0.571565	379	(0.01, 2.9, 0.1)	0	0	precuneus	0	0	0.354659	lower
335	gene coexpression	Receptors	NMDA	clear	0.132417	0.391514	-0.750711	29999	(0.5, 3, 1)	0	0	precuneus	0	0	0.354659	lower
336	gene coexpression	Celltype	Neuro-Ex	mis	0.123804	0.330992	-1.98837	287	(0.9, 2, 0.1)	0	0	precuneus	0	0	0.354659	lower
337	gene coexpression	Receptors	5HTT	clear	0.12119	0.221263	-0.530195	63	(0.9, 3, 0.1)	0	0	precuneus	0	1	0.354659	lower
338	gene coexpression	Celltype	Neuro-Ex	syn	0.120382	0.326024	-2.00185	319	(0.9, 1, 0.1)	0	0	precuneus	0	0	0.354659	lower
339	gene coexpression	Receptors	5HT1b	syn	0.116153	0.420777	-0.950307	29999	(0.01, 3, 1)	0	0	precuneus	0	0	0.354659	lower
340	gene coexpression	Receptors	NET	syn	0.109815	0.378742	-0.682751	29999	(0.01, 3, 1)	0	0	precuneus	0	0	0.354659	lower
341	gene coexpression	Receptors	H3	spread	0.104089	0.233106	-0.530445	569	(0.1, 3, 0.1)	0	0	precuneus	0	0	0.354659	lower
342	gene coexpression	Celltype	Endo	syn	0.101938	0.328316	-0.548056	29999	(0.1, 3, 1)	0	0	precuneus	0	0	0.354659	lower
343	gene coexpression	metabolism	cbf	syn	0.0990867	0.416958	-0.903603	29999	(0.01, 3, 1)	0	0	precuneus	0	0	0.354659	lower
344	gene coexpression	Cortical expansion	scalinghcp	clear	0.094495	0.29298	-0.755134	1223	(0.9, 0.1, 0.1)	0	0	precuneus	0	0	0.354659	lower
345	gene coexpression	Celltype	Neuro-In	mis	0.0926545	0.339199	-2.42384	457	(0.9, 1.5, 0.1)	0	0	precuneus	0	0	0.354659	lower
346	gene coexpression	Receptors	5HT6	mis	0.088474	0.236378	-0.716706	9413	(0.01, 1.5, 0.1)	0	0	precuneus	0	0	0.354659	lower
347	gene coexpression	metabolism	cmrglc	syn	0.0872603	0.483451	-1.16714	29999	(0.01, 0.9, 1)	0	0	precuneus	0	0	0.354659	lower
348	gene coexpression	Celltype	Neuro-In	syn	0.0687377	0.31895	-2.20031	372	(0.9, 0.9, 0.1)	0	0	precuneus	0	0	0.354659	lower
349	gene coexpression	Celltype	Endo	mis	0.0506379	0.289457	-1.9059	687	(0.01, 3, 0.1)	0	0	precuneus	0	0	0.354659	lower
350	gene coexpression	Receptors	VAChT	spread	0.0451935	0.198041	-0.902677	578	(0.01, 3, 0.1)	0	0	precuneus	0	0	0.354659	lower
351	gene coexpression	Celltype	Oligo	spread	0.0398469	0.238229	-0.727251	29999	(0.9, 3, 0.1)	0	0	precuneus	0	0	0.354659	lower
352	gene coexpression	Microstructure	thickness	clear	0.0313562	0.413424	-1.74628	0	(0.9, 0.1, 0.1)	0	0	precuneus	0	0	0.354659	lower
353	gene coexpression	Celltype	Oligo	mis	0.0313561	0.413751	-1.72647	0	(0.01, 3, 1)	0	0	precuneus	0	0	0.354659	lower
354	gene coexpression	Cortical expansion	scaling	clear	0.031355	0.41308	-1.76786	0	(0.9, 0.1, 0.1)	0	0	precuneus	0	0	0.354659	lower
355	gene coexpression	metabolism	cbv	syn	0.0313542	0.414188	-1.70096	0	(0.9, 0.1, 0.1)	0	0	precuneus	0	0	0.354659	lower
356	gene coexpression	Receptors	DAT	clear	0.031351	0.414585	-1.67872	0	(0.9, 0.1, 0.1)	0	0	precuneus	0	0	0.354659	lower
357	gene coexpression	Celltype	Astro	clear	0.0313501	0.414676	-1.67374	0	(0.9, 0.1, 0.1)	0	0	precuneus	0	0	0.354659	lower
358	gene coexpression	Receptors	D2	clear	0.0313481	0.414857	-1.66397	0	(0.9, 0.1, 0.1)	0	0	precuneus	0	0	0.354659	lower
359	gene coexpression	Receptors	5HT4	clear	0.0313441	0.415163	-1.64774	0	(0.9, 0.1, 0.1)	0	0	precuneus	0	0	0.354659	lower
360	gene coexpression	Cortical expansion	evoexp	clear	0.0313401	0.415428	-1.63408	0	(0.9, 0.1, 0.1)	0	0	precuneus	0	0	0.354659	lower
361	gene coexpression	metabolism	cbf	mis	0.0313386	0.415522	-1.62933	0	(0.9, 3, 1)	0	0	precuneus	0	0	0.354659	lower
362	gene coexpression	Receptors	NMDA	mis	0.0313384	0.415538	-1.62852	0	(0.9, 3, 1)	0	0	precuneus	0	0	0.354659	lower
363	gene coexpression	Receptors	NET	mis	0.0313374	0.415594	-1.62571	0	(0.9, 3, 1)	0	0	precuneus	0	0	0.354659	lower
364	gene coexpression	Cortical expansion	scalingnih	clear	0.0313366	0.415643	-1.62324	0	(0.9, 0.1, 0.1)	0	0	precuneus	0	0	0.354659	lower
365	gene coexpression	Microstructure	myelinmap	mis	0.0313362	0.415667	-1.62202	0	(0.9, 3, 1)	0	0	precuneus	0	0	0.354659	lower
366	gene coexpression	Receptors	5HT1b	mis	0.0313354	0.415714	-1.61967	0	(0.9, 3, 1)	0	0	precuneus	0	0	0.354659	lower
367	gene coexpression	Receptors	H3	mis	0.0313351	0.415731	-1.61885	0	(0.9, 3, 1)	0	0	precuneus	0	0	0.354659	lower
368	gene coexpression	Microstructure	genepc1	syn	0.0313342	0.41578	-1.61639	0	(0.01, 0.1, 0.1)	0	0	precuneus	0	0	0.354659	lower
369	gene coexpression	metabolism	cmr02	mis	0.0313338	0.415801	-1.61539	0	(0.9, 3, 0.1)	0	0	precuneus	0	0	0.354659	lower
370	gene coexpression	metabolism	cmrglc	mis	0.0313334	0.415825	-1.61419	0	(0.9, 3, 0.1)	0	0	precuneus	0	0	0.354659	lower
371	gene coexpression	AD-realted	APOE	syn	0.0313326	0.415867	-1.61211	0	(0.01, 0.1, 0.1)	0	0	precuneus	0	0	0.354659	lower
372	gene coexpression	Celltype	Endo	spread	0.0313321	0.41585	-1.61297	0	(0.9, 3, 0.1)	0	0	precuneus	0	0	0.354659	lower
373	gene coexpression	Receptors	A4B2	spread	0.0313321	0.41585	-1.61297	0	(0.9, 3, 0.1)	0	0	precuneus	0	0	0.354659	lower
374	gene coexpression	metabolism	cbf	spread	0.0313321	0.41585	-1.61297	0	(0.9, 3, 0.1)	0	0	precuneus	0	0	0.354659	lower
375	gene coexpression	AD-realted	APOE	mis	0.031332	0.415845	-1.61322	0	(0.9, 0.1, 0.1)	0	0	precuneus	0	0	0.354659	lower
376	gene coexpression	Microstructure	genepc1	mis	0.031332	0.415844	-1.61326	0	(0.9, 0.1, 0.1)	0	0	precuneus	0	0	0.354659	lower
377	gene coexpression	Receptors	VAChT	mis	0.031332	0.415841	-1.6134	0	(0.9, 0.1, 0.1)	0	0	precuneus	0	0	0.354659	lower
378	gene coexpression	metabolism	cbv	mis	0.0313318	0.415835	-1.61371	0	(0.9, 0.1, 0.1)	0	0	precuneus	0	0	0.354659	lower
379	gene coexpression	Receptors	A4B2	mis	0.0313317	0.415829	-1.61402	0	(0.9, 0.1, 0.1)	0	0	precuneus	0	0	0.354659	lower
380	gene coexpression	Receptors	GABAa	mis	0.0313313	0.415809	-1.61501	0	(0.9, 0.1, 0.1)	0	0	precuneus	0	0	0.354659	lower
381	gene coexpression	Receptors	MOR	clear	0.0313311	0.415795	-1.61572	0	(0.01, 3, 1)	0	0	precuneus	0	0	0.354659	lower
382	gene coexpression	Cortical expansion	devexp	clear	0.0313306	0.415773	-1.61682	0	(0.01, 3, 1)	0	0	precuneus	0	0	0.354659	lower
383	gene coexpression	metabolism	cmr02	syn	0.031327	0.415593	-1.62587	0	(0.01, 0.1, 0.1)	0	0	precuneus	0	0	0.354659	lower
384	gene coexpression	Celltype	Micro	clear	0.0313238	0.415448	-1.63323	0	(0.01, 3, 1)	0	0	precuneus	0	0	0.354659	lower
385	gene coexpression	AD-realted	MAPT	clear	0.0313238	0.415446	-1.63332	0	(0.01, 3, 1)	0	0	precuneus	0	0	0.354659	lower
386	gene coexpression	Microstructure	myelinmap	syn	0.0313233	0.415424	-1.63446	0	(0.01, 3, 1)	0	0	precuneus	0	0	0.354659	lower
387	gene coexpression	Receptors	5HT1a	clear	0.031322	0.415367	-1.63743	0	(0.01, 3, 1)	0	0	precuneus	0	0	0.354659	lower
388	gene coexpression	Receptors	CB1	clear	0.0313196	0.411297	-1.89457	0	(0.9, 0.1, 0.1)	0	0	precuneus	0	0	0.354659	lower
389	gene coexpression	Receptors	NMDA	syn	0.0313161	0.415128	-1.64987	0	(0.01, 3, 1)	0	0	precuneus	0	0	0.354659	lower
390	gene coexpression	Receptors	D1	clear	0.0313136	0.41503	-1.65507	0	(0.01, 3, 1)	0	0	precuneus	0	0	0.354659	lower
391	gene coexpression	Receptors	mGluR5	clear	0.031311	0.414936	-1.66009	0	(0.01, 3, 1)	0	0	precuneus	0	0	0.354659	lower
392	gene coexpression	Receptors	GABAa	syn	0.031297	0.410788	-1.93646	0	(0.9, 0.1, 0.1)	0	0	precuneus	0	0	0.354659	lower
393	gene coexpression	Celltype	OPC	clear	0.0312876	0.410616	-1.95134	0	(0.9, 0.1, 0.1)	0	0	precuneus	0	0	0.354659	lower
394	gene coexpression	Celltype	Oligo	syn	0.0311298	0.411576	-1.87556	0	(0.01, 0.9, 1)	0	0	precuneus	0	0	0.354659	lower
1	receptor similarity	AD-realted	MAPT	mis	0.862845	0.034825	0.744296	309	(0.7, 2.5, 1)	1	0	entorhinal	1	1	0.353443	higher
2	receptor similarity	AD-realted	MAPT	spread	0.84463	0.0658094	0.65696	464	(0.9, 3, 0.7)	0	0	entorhinal	1	0	0.353443	higher
3	receptor similarity	AD-realted	MAPT	mis	0.836432	0.042764	0.699618	29999	(0.7, 1.5, 1)	1	0	precuneus	0	1	0.0978585	higher
4	receptor similarity	AD-realted	MAPT	syn	0.826375	0.0467081	0.67525	468	(0.9, 1.5, 0.1)	0	0	entorhinal	1	0	0.353443	higher
5	receptor similarity	Receptors	D2	syn	0.820716	0.0779051	0.672382	249	(0.7, 0.9, 1)	1	0	entorhinal	1	1	0.353443	higher
6	receptor similarity	AD-realted	MAPT	syn	0.810448	0.0633204	0.656774	226	(0.7, 2.9, 0.1)	0	0	precuneus	0	0	0.0978585	higher
7	receptor similarity	Cortical expansion	scaling	spread	0.806169	0.0751188	0.643618	176	(0.7, 1.5, 1)	1	0	entorhinal	1	1	0.353443	higher
8	receptor similarity	Cortical expansion	scalingpnc	spread	0.804529	0.0755977	0.623521	386	(0.9, 1, 1)	1	0	entorhinal	1	1	0.353443	higher
9	receptor similarity	Receptors	D2	mis	0.803901	0.108855	0.633435	209	(0.7, 1.5, 1)	0	0	entorhinal	1	0	0.353443	higher
10	receptor similarity	Cortical expansion	scalinghcp	spread	0.801904	0.0776716	0.640974	127	(0.5, 2, 1)	1	0	entorhinal	1	1	0.353443	higher
11	receptor similarity	Cortical expansion	scalinghcp	mis	0.797808	0.128476	0.527932	77	(0.3, 3, 1)	0	0	entorhinal	1	0	0.353443	higher
12	receptor similarity	Microstructure	thickness	syn	0.795075	0.0829007	0.605327	487	(0.3, 1.5, 0.1)	1	0	entorhinal	1	1	0.353443	higher
13	receptor similarity	Cortical expansion	scalinghcp	syn	0.794877	0.132713	0.529387	95	(0.7, 3, 0.7)	0	0	entorhinal	1	0	0.353443	higher
14	receptor similarity	Cortical expansion	scalingnih	syn	0.793712	0.10805	0.5443	84	(0.5, 1.9, 1)	1	0	entorhinal	1	1	0.353443	higher
15	receptor similarity	Receptors	D2	syn	0.793155	0.0688501	0.615588	577	(0.7, 0.9, 1)	1	0	precuneus	0	1	0.0978585	higher
16	receptor similarity	metabolism	cbf	clear	0.791195	0.0826134	0.544857	119	(0.01, 0.9, 1)	1	0	precuneus	1	1	0.0978585	higher
17	receptor similarity	Microstructure	thickness	syn	0.788069	0.10038	0.580522	593	(0.7, 0.9, 0.1)	1	0	precuneus	0	1	0.0978585	higher
18	receptor similarity	Receptors	5HT4	syn	0.787479	0.0997251	0.589264	171	(0.7, 1, 0.7)	1	0	entorhinal	1	1	0.353443	higher
19	receptor similarity	Cortical expansion	scalingnih	spread	0.786458	0.0768677	0.612872	179	(0.7, 1.5, 1)	0	0	entorhinal	1	0	0.353443	higher
20	receptor similarity	Cortical expansion	scaling	mis	0.785585	0.12638	0.533209	83	(0.5, 2.5, 1)	0	0	entorhinal	1	0	0.353443	higher
21	receptor similarity	Receptors	5HT4	mis	0.785419	0.0986736	0.572139	120	(0.5, 1.9, 1)	0	0	entorhinal	1	0	0.353443	higher
22	receptor similarity	Receptors	D2	spread	0.784311	0.0823652	0.605194	141	(0.5, 2, 1)	0	0	entorhinal	1	0	0.353443	higher
23	receptor similarity	Receptors	5HT1a	syn	0.779744	0.0802778	0.605045	776	(0.01, 2, 0.1)	1	0	precuneus	1	1	0.0978585	higher
24	receptor similarity	Receptors	D2	mis	0.777725	0.0886038	0.588931	701	(0.7, 1.5, 1)	0	0	precuneus	0	0	0.0978585	higher
25	receptor similarity	Receptors	5HT1a	syn	0.776358	0.0644455	0.600364	1030	(0.1, 1.5, 0.1)	1	0	entorhinal	0	1	0.353443	higher
26	receptor similarity	Receptors	5HT4	spread	0.773981	0.0713501	0.592285	190	(0.7, 1.5, 0.9)	0	0	entorhinal	1	0	0.353443	higher
27	receptor similarity	Cortical expansion	evoexp	syn	0.772589	0.111177	0.540596	103	(0.7, 1.5, 1)	1	0	entorhinal	1	1	0.353443	higher
28	receptor similarity	Receptors	VAChT	clear	0.771951	0.15637	0.411267	60	(0.3, 3, 1)	1	0	entorhinal	1	1	0.353443	higher
29	receptor similarity	Microstructure	thickness	mis	0.769351	0.0835009	0.570247	119	(0.1, 3, 1)	0	0	entorhinal	1	0	0.353443	higher
30	receptor similarity	Cortical expansion	scalingnih	mis	0.763519	0.128345	0.485762	83	(0.5, 2.5, 1)	0	0	entorhinal	1	0	0.353443	higher
31	receptor similarity	Cortical expansion	scalingpnc	syn	0.762146	0.130381	0.399552	57	(0.3, 2.9, 1)	0	0	entorhinal	1	0	0.353443	higher
32	receptor similarity	Cortical expansion	scaling	syn	0.76163	0.170214	0.454517	116	(0.9, 3, 0.1)	0	0	entorhinal	1	0	0.353443	higher
33	receptor similarity	Microstructure	thickness	mis	0.761474	0.0952292	0.534396	815	(0.7, 1.5, 0.3)	0	0	precuneus	0	0	0.0978585	higher
34	receptor similarity	Receptors	5HT1a	mis	0.76064	0.0773385	0.577944	1015	(0.3, 1.9, 0.1)	0	0	precuneus	1	0	0.0978585	higher
35	receptor similarity	Cortical expansion	devexp	spread	0.760134	0.0616547	0.561139	334	(0.9, 1.5, 1)	1	0	entorhinal	1	1	0.353443	higher
36	receptor similarity	Receptors	5HT1a	spread	0.759923	0.0840622	0.567845	100	(0.3, 2.9, 1)	0	0	entorhinal	1	0	0.353443	higher
37	receptor similarity	Receptors	5HT1a	mis	0.758569	0.0803433	0.565694	1162	(0.01, 2.5, 0.1)	0	0	entorhinal	0	0	0.353443	higher
38	receptor similarity	Microstructure	thickness	spread	0.756199	0.0865694	0.551278	92	(0.3, 3, 1)	0	0	entorhinal	1	0	0.353443	higher
39	receptor similarity	metabolism	cbf	clear	0.755705	0.053264	0.540922	118	(0.01, 3, 1)	1	0	entorhinal	0	1	0.353443	higher
40	receptor similarity	metabolism	cbv	spread	0.754625	0.106569	0.54357	116	(0.5, 3, 1)	1	0	entorhinal	1	1	0.353443	higher
41	receptor similarity	Cortical expansion	evoexp	mis	0.753672	0.138258	0.498302	91	(0.7, 2.5, 1)	0	0	entorhinal	1	0	0.353443	higher
42	receptor similarity	Receptors	5HT6	spread	0.750638	0.0875598	0.559903	104	(0.5, 2, 1)	1	0	entorhinal	1	1	0.353443	higher
43	receptor similarity	AD-realted	Cluster3	syn	0.750249	0.0699427	0.551108	83	(0.3, 3, 1)	1	0	entorhinal	1	1	0.353443	higher
44	receptor similarity	AD-realted	Cluster1	spread	0.750249	0.0699427	0.551108	83	(0.3, 3, 1)	0	0	entorhinal	1	0	0.353443	higher
45	receptor similarity	AD-realted	Cluster4	clear	0.750249	0.0699427	0.551108	83	(0.3, 3, 1)	0	0	entorhinal	1	0	0.353443	higher
46	receptor similarity	AD-realted	Cluster7	mis	0.750249	0.0699427	0.551108	83	(0.3, 3, 1)	0	0	entorhinal	1	0	0.353443	higher
47	receptor similarity	AD-realted	Cluster6	syn	0.750249	0.0699427	0.551108	83	(0.3, 3, 1)	1	0	entorhinal	1	1	0.353443	higher
48	receptor similarity	AD-realted	Cluster5	syn	0.750249	0.0699427	0.551108	83	(0.3, 3, 1)	1	0	entorhinal	1	1	0.353443	higher
49	receptor similarity	AD-realted	Cluster1	clear	0.750249	0.0699427	0.551108	83	(0.3, 3, 1)	0	0	entorhinal	1	0	0.353443	higher
50	receptor similarity	AD-realted	Cluster1	syn	0.750249	0.0699427	0.551108	83	(0.3, 3, 1)	1	0	entorhinal	1	1	0.353443	higher
51	receptor similarity	AD-realted	Cluster1	mis	0.750249	0.0699427	0.551108	83	(0.3, 3, 1)	0	0	entorhinal	1	0	0.353443	higher
52	receptor similarity	AD-realted	Cluster3	spread	0.750249	0.0699427	0.551108	83	(0.3, 3, 1)	0	0	entorhinal	1	0	0.353443	higher
53	receptor similarity	AD-realted	Cluster5	spread	0.750249	0.0699427	0.551108	83	(0.3, 3, 1)	0	0	entorhinal	1	0	0.353443	higher
54	receptor similarity	AD-realted	Cluster3	mis	0.750249	0.0699427	0.551108	83	(0.3, 3, 1)	0	0	entorhinal	1	0	0.353443	higher
55	receptor similarity	AD-realted	Cluster6	spread	0.750249	0.0699427	0.551108	83	(0.3, 3, 1)	0	0	entorhinal	1	0	0.353443	higher
56	receptor similarity	AD-realted	Cluster3	clear	0.750249	0.0699427	0.551108	83	(0.3, 3, 1)	0	0	entorhinal	1	0	0.353443	higher
57	receptor similarity				0.750249	0.0699427	0.551108	83	(0.3, 3, 1)	0	1	entorhinal	1	0	0.353443	higher
58	receptor similarity	AD-realted	Cluster2	syn	0.750249	0.0699427	0.551108	83	(0.3, 3, 1)	1	0	entorhinal	1	1	0.353443	higher
59	receptor similarity	AD-realted	Cluster5	mis	0.750249	0.0699427	0.551108	83	(0.3, 3, 1)	0	0	entorhinal	1	0	0.353443	higher
60	receptor similarity	AD-realted	Cluster5	clear	0.750249	0.0699427	0.551108	83	(0.3, 3, 1)	0	0	entorhinal	1	0	0.353443	higher
61	receptor similarity	AD-realted	Cluster2	spread	0.750249	0.0699427	0.551108	83	(0.3, 3, 1)	0	0	entorhinal	1	0	0.353443	higher
62	receptor similarity	AD-realted	Cluster4	syn	0.750249	0.0699427	0.551108	83	(0.3, 3, 1)	1	0	entorhinal	1	1	0.353443	higher
63	receptor similarity	AD-realted	Cluster4	spread	0.750249	0.0699427	0.551108	83	(0.3, 3, 1)	0	0	entorhinal	1	0	0.353443	higher
64	receptor similarity	AD-realted	Cluster2	clear	0.750249	0.0699427	0.551108	83	(0.3, 3, 1)	0	0	entorhinal	1	0	0.353443	higher
65	receptor similarity	AD-realted	Cluster6	clear	0.750249	0.0699427	0.551108	83	(0.3, 3, 1)	0	0	entorhinal	1	0	0.353443	higher
66	receptor similarity	AD-realted	Cluster2	mis	0.750249	0.0699427	0.551108	83	(0.3, 3, 1)	0	0	entorhinal	1	0	0.353443	higher
67	receptor similarity	AD-realted	Cluster7	syn	0.750249	0.0699427	0.551108	83	(0.3, 3, 1)	1	0	entorhinal	1	1	0.353443	higher
68	receptor similarity	AD-realted	Cluster4	mis	0.750249	0.0699427	0.551108	83	(0.3, 3, 1)	0	0	entorhinal	1	0	0.353443	higher
69	receptor similarity	AD-realted	Cluster7	spread	0.750249	0.0699427	0.551108	83	(0.3, 3, 1)	0	0	entorhinal	1	0	0.353443	higher
70	receptor similarity	AD-realted	Cluster6	mis	0.750249	0.0699427	0.551108	83	(0.3, 3, 1)	0	0	entorhinal	1	0	0.353443	higher
71	receptor similarity	AD-realted	Cluster7	clear	0.750249	0.0699427	0.551108	83	(0.3, 3, 1)	0	0	entorhinal	1	0	0.353443	higher
72	receptor similarity	Receptors	5HTT	clear	0.748727	0.157564	0.346938	43	(0.01, 2, 1)	1	0	entorhinal	1	1	0.353443	higher
73	receptor similarity	Celltype	Astro	syn	0.745684	0.0736566	0.535577	101	(0.1, 2, 1)	1	0	entorhinal	1	1	0.353443	higher
74	receptor similarity	Celltype	Micro	spread	0.744874	0.0877607	0.537205	163	(0.7, 2.5, 0.9)	1	0	entorhinal	1	1	0.353443	higher
75	receptor similarity	Cortical expansion	scalingpnc	mis	0.74225	0.142281	0.420728	68	(0.5, 2.9, 1)	0	0	entorhinal	1	0	0.353443	higher
76	receptor similarity	Celltype	OPC	syn	0.741996	0.0804397	0.517472	83	(0.01, 2.5, 1)	1	0	entorhinal	1	1	0.353443	higher
77	receptor similarity	AD-realted	Abeta	spread	0.740786	0.0894213	0.53768	73	(0.3, 3, 1)	1	0	entorhinal	1	1	0.353443	higher
78	receptor similarity	Microstructure	genepc1	spread	0.736267	0.0956703	0.478282	91	(0.3, 3, 1)	1	0	entorhinal	1	1	0.353443	higher
79	receptor similarity	Receptors	NET	spread	0.736061	0.0834966	0.529238	354	(0.9, 1, 1)	1	0	entorhinal	1	1	0.353443	higher
80	receptor similarity	Receptors	M1	spread	0.731185	0.0991119	0.519158	218	(0.7, 1.5, 0.3)	1	0	entorhinal	1	1	0.353443	higher
81	receptor similarity	Cortical expansion	evoexp	spread	0.729763	0.0964483	0.493543	80	(0.3, 2.9, 1)	0	0	entorhinal	1	0	0.353443	higher
82	receptor similarity	Receptors	5HT2a	spread	0.729282	0.0955276	0.499467	96	(0.5, 2.5, 0.9)	1	0	entorhinal	1	1	0.353443	higher
83	receptor similarity	Receptors	M1	syn	0.728784	0.104433	0.385054	58	(0.01, 3, 1)	0	0	entorhinal	1	0	0.353443	higher
84	receptor similarity	Receptors	5HT1b	clear	0.727697	0.0593462	0.491541	313	(0.01, 2.5, 1)	1	0	precuneus	1	1	0.0978585	higher
85	receptor similarity	Celltype	Astro	spread	0.724656	0.112571	0.474521	257	(0.7, 2, 0.3)	0	0	entorhinal	1	0	0.353443	higher
86	receptor similarity	Receptors	5HT1b	clear	0.723066	0.0591008	0.473746	576	(0.01, 2.5, 1)	1	0	entorhinal	0	1	0.353443	higher
87	receptor similarity	AD-realted	Abeta	syn	0.719829	0.0848388	0.495155	55	(0.01, 3, 1)	0	0	entorhinal	1	0	0.353443	higher
88	receptor similarity	Receptors	5HT2a	syn	0.717995	0.136329	0.302903	54	(0.3, 3, 1)	0	0	entorhinal	1	0	0.353443	higher
89	receptor similarity	Microstructure	myelinmap	spread	0.717251	0.096146	0.466345	90	(0.3, 3, 1)	1	0	entorhinal	1	1	0.353443	higher
90	receptor similarity	Celltype	Micro	syn	0.715315	0.0906305	0.435232	75	(0.01, 2.5, 1)	0	0	entorhinal	1	0	0.353443	higher
91	receptor similarity	Receptors	CB1	spread	0.714944	0.094278	0.482732	153	(0.5, 2.5, 0.3)	1	0	entorhinal	1	1	0.353443	higher
92	receptor similarity	Celltype	Oligo	clear	0.713004	0.106228	0.408182	182	(0.01, 0.5, 1)	1	0	entorhinal	1	1	0.353443	higher
93	receptor similarity	Celltype	OPC	spread	0.712866	0.116616	0.432498	362	(0.7, 2, 0.1)	0	0	entorhinal	1	0	0.353443	higher
94	receptor similarity	Receptors	5HTT	syn	0.711211	0.0612059	0.425216	164	(0.01, 1.5, 1)	0	0	entorhinal	1	0	0.353443	higher
95	receptor similarity	Cortical expansion	devexp	mis	0.70822	0.135133	0.308123	65	(0.1, 3, 1)	0	0	entorhinal	1	0	0.353443	higher
96	receptor similarity	Receptors	5HT2a	mis	0.706373	0.117404	0.375751	65	(0.3, 3, 1)	0	0	entorhinal	1	0	0.353443	higher
97	receptor similarity	Receptors	M1	mis	0.70526	0.134381	0.372329	63	(0.3, 3, 1)	0	0	entorhinal	1	0	0.353443	higher
98	receptor similarity	Receptors	DAT	syn	0.704058	0.0646506	0.440759	149	(0.01, 1.5, 1)	1	0	entorhinal	1	1	0.353443	higher
99	receptor similarity	Receptors	CB1	syn	0.702559	0.0724078	0.462579	81	(0.01, 2, 1)	0	0	entorhinal	1	0	0.353443	higher
100	receptor similarity	AD-realted	Abeta	mis	0.699872	0.0857054	0.454872	66	(0.01, 3, 1)	0	0	entorhinal	1	0	0.353443	higher
101	receptor similarity	Celltype	Endo	syn	0.698329	0.0761043	0.38829	93	(0.01, 2, 1)	1	0	entorhinal	1	1	0.353443	higher
102	receptor similarity	Cortical expansion	devexp	syn	0.698287	0.110863	0.334322	56	(0.1, 3, 1)	0	0	entorhinal	1	0	0.353443	higher
103	receptor similarity	AD-realted	APOE	spread	0.693987	0.0808123	0.444955	374	(0.9, 1, 1)	1	0	entorhinal	1	1	0.353443	higher
104	receptor similarity	Receptors	H3	clear	0.69011	0.12036	0.369278	73	(0.01, 3, 1)	1	0	entorhinal	1	1	0.353443	higher
105	receptor similarity	Celltype	Neuro-Ex	syn	0.687948	0.0819731	0.375657	79	(0.01, 2.5, 1)	1	0	entorhinal	1	1	0.353443	higher
106	receptor similarity	Celltype	Neuro-Ex	spread	0.685803	0.0736026	0.405758	268	(0.7, 3, 0.1)	0	0	entorhinal	1	0	0.353443	higher
107	receptor similarity	Receptors	NMDA	syn	0.684085	0.0763331	0.403559	74	(0.01, 2.5, 1)	1	0	entorhinal	1	1	0.353443	higher
108	receptor similarity	Receptors	GABAa	spread	0.683976	0.0662245	0.360579	248	(0.7, 3, 0.1)	1	0	entorhinal	1	1	0.353443	higher
109	receptor similarity	Receptors	D1	spread	0.682229	0.0777704	0.423695	295	(0.7, 2.5, 0.1)	1	0	entorhinal	1	1	0.353443	higher
110	receptor similarity	Receptors	mGluR5	spread	0.682035	0.0767923	0.39678	237	(0.7, 3, 0.1)	1	0	entorhinal	1	1	0.353443	higher
111	receptor similarity	Receptors	MOR	spread	0.680694	0.0646291	0.353206	271	(0.9, 2.9, 0.1)	1	0	entorhinal	1	1	0.353443	higher
112	receptor similarity	Receptors	A4B2	clear	0.678013	0.107808	0.357222	77	(0.01, 3, 1)	1	0	entorhinal	1	1	0.353443	higher
113	receptor similarity	metabolism	cbv	syn	0.677709	0.099045	0.343152	68	(0.01, 3, 1)	0	0	entorhinal	1	0	0.353443	higher
114	receptor similarity	Receptors	DAT	spread	0.674712	0.109329	0.413754	172	(0.5, 3, 0.3)	0	0	entorhinal	1	0	0.353443	higher
115	receptor similarity	Celltype	Neuro-In	spread	0.673991	0.0761574	0.383375	266	(0.7, 3, 0.1)	1	0	entorhinal	1	1	0.353443	higher
116	receptor similarity	Celltype	Endo	clear	0.673867	0.187051	0.206741	48	(0.1, 1.5, 1)	0	0	entorhinal	1	0	0.353443	higher
117	receptor similarity	Celltype	Neuro-In	syn	0.671979	0.0772056	0.326141	93	(0.01, 2, 1)	0	0	entorhinal	1	0	0.353443	higher
118	receptor similarity	Receptors	5HT6	syn	0.671138	0.102198	0.400466	59	(0.3, 3, 1)	0	0	entorhinal	1	0	0.353443	higher
119	receptor similarity	metabolism	cmrglc	clear	0.669877	0.0755216	0.401731	137	(0.01, 3, 1)	1	0	entorhinal	1	1	0.353443	higher
120	receptor similarity	Receptors	NET	clear	0.663168	0.0766488	0.334463	780	(0.01, 1.5, 1)	0	0	entorhinal	1	0	0.353443	higher
121	receptor similarity	Receptors	NET	clear	0.663115	0.0767752	0.334579	826	(0.01, 1.5, 1)	1	0	precuneus	0	0	0.0978585	higher
122	receptor similarity	Receptors	5HT1b	spread	0.660724	0.0665389	0.270893	285	(0.9, 2.5, 0.1)	0	0	entorhinal	1	0	0.353443	higher
123	receptor similarity	Receptors	NMDA	spread	0.659913	0.131896	0.36844	243	(0.5, 2.5, 0.1)	0	0	entorhinal	1	0	0.353443	higher
124	receptor similarity	metabolism	cmr02	spread	0.654404	0.099302	0.363768	82	(0.3, 3, 1)	1	0	entorhinal	1	1	0.353443	higher
125	receptor similarity	Receptors	D1	syn	0.65355	0.0827606	0.339426	95	(0.01, 1.9, 1)	0	0	entorhinal	1	0	0.353443	higher
126	receptor similarity	metabolism	cmrglc	clear	0.652466	0.118117	0.390133	29999	(0.01, 3, 1)	1	0	precuneus	0	1	0.0978585	higher
127	receptor similarity	metabolism	cmrglc	spread	0.651938	0.0779116	0.290547	273	(0.9, 2.5, 0.1)	0	0	entorhinal	1	0	0.353443	higher
128	receptor similarity	Receptors	MOR	syn	0.651178	0.0786651	0.290065	109	(0.01, 1.5, 1)	0	0	entorhinal	1	0	0.353443	higher
129	receptor similarity	Celltype	Oligo	clear	0.646663	0.118338	0.233952	370	(0.5, 0.5, 1)	1	0	precuneus	0	1	0.0978585	higher
130	receptor similarity	Receptors	A4B2	clear	0.644662	0.109815	0.254015	356	(0.01, 1, 1)	1	0	precuneus	0	1	0.0978585	higher
131	receptor similarity	AD-realted	Abeta	spread	0.64078	0.103247	0.374348	29999	(0.9, 3, 1)	1	0	precuneus	0	1	0.0978585	higher
132	receptor similarity	Receptors	A4B2	spread	0.640319	0.0750973	0.272539	237	(0.9, 2.9, 0.1)	0	0	entorhinal	1	0	0.353443	higher
133	receptor similarity	Receptors	GABAa	clear	0.638287	0.098899	0.292202	94	(0.01, 3, 1)	0	0	entorhinal	1	0	0.353443	higher
134	receptor similarity	metabolism	cmr02	clear	0.635113	0.080118	0.318104	108	(0.01, 3, 1)	0	0	entorhinal	1	0	0.353443	higher
135	receptor similarity	Receptors	D2	spread	0.634587	0.0834292	0.300262	3421	(0.01, 1.5, 0.1)	0	0	precuneus	0	0	0.0978585	higher
136	receptor similarity	Receptors	H3	spread	0.631944	0.0807883	0.28256	238	(0.9, 3, 0.1)	0	0	entorhinal	1	0	0.353443	higher
137	receptor similarity	Receptors	5HT4	mis	0.629544	0.149855	0.268768	4940	(0.9, 1, 0.1)	1	0	precuneus	0	0	0.0978585	higher
138	receptor similarity	Receptors	5HTT	spread	0.628242	0.0871616	0.282592	259	(0.7, 3, 0.1)	0	0	entorhinal	1	0	0.353443	higher
139	receptor similarity	Celltype	Oligo	syn	0.625732	0.096164	0.14374	102	(0.01, 1.9, 1)	0	0	entorhinal	1	0	0.353443	higher
140	receptor similarity	AD-realted	APOE	clear	0.624677	0.0885723	0.32843	101	(0.01, 3, 1)	0	0	entorhinal	1	0	0.353443	higher
141	receptor similarity	Receptors	VAChT	spread	0.623006	0.0937697	0.277163	239	(0.9, 3, 0.1)	0	0	entorhinal	1	0	0.353443	higher
142	receptor similarity	Receptors	CB1	mis	0.622632	0.109142	0.20961	73	(0.01, 2.9, 1)	0	0	entorhinal	1	0	0.353443	higher
143	receptor similarity	metabolism	cbf	spread	0.622557	0.0919964	0.2503	229	(0.9, 3, 0.1)	0	0	entorhinal	1	0	0.353443	higher
144	receptor similarity	Celltype	Oligo	spread	0.621001	0.075513	0.173226	248	(0.9, 3, 0.1)	0	0	entorhinal	1	0	0.353443	higher
145	receptor similarity	Receptors	GABAa	clear	0.620941	0.103441	0.242375	194	(0.01, 1.9, 1)	1	0	precuneus	0	0	0.0978585	higher
146	receptor similarity	Celltype	Astro	mis	0.62037	0.191859	0.246486	120	(0.7, 1.9, 1)	0	0	entorhinal	1	0	0.353443	higher
147	receptor similarity	Celltype	Endo	spread	0.617405	0.105008	0.258394	298	(0.7, 2.5, 0.1)	0	0	entorhinal	1	0	0.353443	higher
148	receptor similarity	Receptors	5HT4	syn	0.615689	0.132994	0.323393	462	(0.9, 1, 0.1)	0	0	precuneus	0	1	0.0978585	higher
149	receptor similarity	Receptors	VAChT	syn	0.611137	0.098921	0.0957623	103	(0.01, 1.9, 1)	0	0	entorhinal	1	0	0.353443	higher
150	receptor similarity	Receptors	5HT6	mis	0.604678	0.138546	0.188613	66	(0.3, 3, 1)	0	0	entorhinal	1	0	0.353443	higher
151	receptor similarity	Receptors	5HT1a	spread	0.604023	0.11395	0.313639	11238	(0.01, 1, 0.1)	0	0	precuneus	0	0	0.0978585	higher
152	receptor similarity	AD-realted	APOE	clear	0.602236	0.0945875	0.29681	556	(0.01, 0.9, 1)	1	0	precuneus	0	0	0.0978585	higher
153	receptor similarity	Receptors	mGluR5	syn	0.595218	0.113387	0.155936	59	(0.01, 2.9, 1)	0	0	entorhinal	1	0	0.353443	higher
154	receptor similarity	Receptors	VAChT	clear	0.590718	0.206336	-0.348651	786	(0.1, 1, 0.1)	1	0	precuneus	0	1	0.0978585	higher
155	receptor similarity	metabolism	cmr02	clear	0.588523	0.175796	0.2817	29999	(0.5, 3, 1)	1	0	precuneus	0	0	0.0978585	higher
156	receptor similarity	Celltype	Micro	mis	0.58633	0.15647	0.189766	88	(0.01, 2.5, 1)	0	0	entorhinal	1	0	0.353443	higher
157	receptor similarity	Celltype	OPC	mis	0.584605	0.250301	-0.149657	149	(0.9, 3, 0.1)	0	0	entorhinal	1	0	0.353443	higher
158	receptor similarity	AD-realted	MAPT	spread	0.582706	0.0876975	0.200969	16017	(0.01, 1, 0.1)	0	0	precuneus	0	0	0.0978585	higher
159	receptor similarity	Receptors	5HTT	syn	0.581599	0.0806304	0.136768	4671	(0.5, 0.9, 0.1)	1	0	precuneus	0	0	0.0978585	higher
160	receptor similarity	Microstructure	myelinmap	syn	0.574266	0.151066	-0.0189214	59	(0.01, 3, 1)	0	0	entorhinal	1	0	0.353443	higher
161	receptor similarity	Microstructure	genepc1	clear	0.562307	0.10161	0.214929	76	(0.3, 3, 1)	0	0	entorhinal	1	0	0.353443	higher
162	receptor similarity	Receptors	NET	spread	0.558489	0.103111	0.170599	29999	(0.9, 3, 1)	0	0	precuneus	0	1	0.0978585	higher
163	receptor similarity	Receptors	GABAa	spread	0.553143	0.127412	0.237155	29999	(0.9, 3, 1)	0	0	precuneus	0	1	0.0978585	higher
164	receptor similarity	metabolism	cbv	mis	0.551821	0.210136	-0.0734613	94	(0.7, 3, 1)	0	0	entorhinal	1	0	0.353443	higher
165	receptor similarity	Receptors	5HT2a	spread	0.550945	0.119236	0.176706	29999	(0.9, 1.5, 1)	1	0	precuneus	0	1	0.0978585	higher
166	receptor similarity	Receptors	NMDA	mis	0.545267	0.16982	0.0176758	69	(0.3, 3, 1)	0	0	entorhinal	1	0	0.353443	higher
167	receptor similarity	Celltype	Neuro-In	clear	0.543656	0.174664	0.11216	81	(0.01, 0.9, 1)	0	0	entorhinal	1	0	0.353443	higher
168	receptor similarity	Celltype	Neuro-Ex	clear	0.540078	0.182664	0.098164	73	(0.01, 1, 1)	0	0	entorhinal	1	0	0.353443	higher
169	receptor similarity	Receptors	DAT	syn	0.52879	0.121829	0.163349	3015	(0.5, 1, 0.1)	1	0	precuneus	0	1	0.0978585	higher
170	receptor similarity	AD-realted	APOE	spread	0.524006	0.122602	0.114348	29999	(0.9, 3, 1)	0	0	precuneus	0	1	0.0978585	higher
171	receptor similarity	Receptors	NMDA	clear	0.523371	0.175027	-0.0584096	90	(0.01, 1, 1)	0	0	entorhinal	1	0	0.353443	higher
172	receptor similarity	Receptors	5HT6	clear	0.522413	0.153026	0.053809	89	(0.1, 3, 1)	0	0	entorhinal	1	0	0.353443	higher
173	receptor similarity	Receptors	H3	syn	0.521234	0.143868	-0.214243	95	(0.01, 1.9, 1)	0	0	entorhinal	1	0	0.353443	higher
174	receptor similarity	Celltype	Neuro-Ex	mis	0.519015	0.178772	-0.0664724	83	(0.01, 3, 1)	0	0	entorhinal	1	0	0.353443	higher
175	receptor similarity	Receptors	mGluR5	mis	0.518821	0.146644	-0.10142	67	(0.01, 2.9, 1)	0	0	entorhinal	1	0	0.353443	higher
176	receptor similarity	Celltype	Endo	mis	0.514086	0.186995	-0.000288672	76	(0.3, 3, 1)	0	0	entorhinal	1	0	0.353443	higher
177	receptor similarity	Microstructure	thickness	spread	0.510581	0.157461	0.189593	5011	(0.01, 1.5, 0.1)	0	0	precuneus	0	0	0.0978585	higher
178	receptor similarity	Receptors	MOR	mis	0.506849	0.146763	-0.223429	119	(0.01, 1.9, 1)	0	0	entorhinal	1	0	0.353443	higher
179	receptor similarity	Receptors	M1	spread	0.506484	0.123031	0.153488	29999	(0.9, 1.9, 1)	1	0	precuneus	0	1	0.0978585	higher
180	receptor similarity	Receptors	GABAa	syn	0.506352	0.161915	-0.344274	61	(0.01, 3, 1)	0	0	entorhinal	1	0	0.353443	higher
181	receptor similarity	Receptors	D1	mis	0.504603	0.15482	-0.0783139	126	(0.01, 1.9, 1)	0	0	entorhinal	1	0	0.353443	higher
182	receptor similarity	Receptors	mGluR5	clear	0.503536	0.203512	0.00164671	65	(0.3, 3, 1)	0	0	entorhinal	1	0	0.353443	higher
183	receptor similarity	Celltype	Astro	syn	0.499374	0.121515	0.0547684	531	(0.7, 3, 0.1)	1	0	precuneus	0	1	0.0978585	higher
184	receptor similarity	Microstructure	genepc1	clear	0.492182	0.271992	0.17873	29999	(0.7, 3, 1)	1	0	precuneus	0	0	0.0978585	higher
185	receptor similarity	Receptors	DAT	mis	0.49182	0.170398	-0.11855	170	(0.01, 1.9, 1)	0	0	entorhinal	1	0	0.353443	higher
186	receptor similarity	Receptors	5HT6	clear	0.488413	0.183254	-0.0404935	408	(0.01, 1, 1)	1	0	precuneus	0	0	0.0978585	higher
187	receptor similarity	Celltype	Neuro-In	mis	0.486954	0.186192	-0.169757	84	(0.01, 2.9, 1)	0	0	entorhinal	1	0	0.353443	higher
188	receptor similarity	Receptors	M1	clear	0.479025	0.184234	0.0142028	89	(0.1, 3, 1)	0	0	entorhinal	1	0	0.353443	higher
189	receptor similarity	Microstructure	genepc1	syn	0.477907	0.201274	-0.419025	60	(0.01, 3, 1)	0	0	entorhinal	1	0	0.353443	higher
190	receptor similarity	Microstructure	myelinmap	clear	0.477367	0.240818	0.157675	29999	(0.9, 3, 1)	0	0	entorhinal	1	0	0.353443	higher
191	receptor similarity	Microstructure	myelinmap	clear	0.477132	0.240826	0.157284	29999	(0.9, 3, 1)	1	0	precuneus	0	0	0.0978585	higher
192	receptor similarity	metabolism	cmr02	syn	0.476935	0.186987	-0.490252	59	(0.01, 3, 1)	0	0	entorhinal	1	0	0.353443	higher
193	receptor similarity	Receptors	5HT4	spread	0.474661	0.144206	0.132485	12762	(0.01, 1, 0.1)	0	0	precuneus	0	0	0.0978585	higher
194	receptor similarity	Receptors	DAT	clear	0.473621	0.223555	-0.375251	32	(0.01, 3, 1)	0	0	entorhinal	1	0	0.353443	higher
195	receptor similarity	Receptors	NET	syn	0.46818	0.204337	-0.494449	61	(0.01, 3, 1)	0	0	entorhinal	1	0	0.353443	higher
196	receptor similarity	Receptors	A4B2	syn	0.463232	0.198968	-0.457659	55	(0.01, 3, 1)	0	0	entorhinal	1	0	0.353443	higher
197	receptor similarity	Celltype	OPC	syn	0.462128	0.129802	-0.036955	670	(0.7, 2, 0.1)	1	0	precuneus	0	1	0.0978585	higher
198	receptor similarity	Cortical expansion	devexp	mis	0.461498	0.260223	-1.32454	3460	(0.9, 1, 0.1)	1	0	precuneus	0	0	0.0978585	higher
199	receptor similarity	Receptors	M1	clear	0.46019	0.213426	-0.0281102	367	(0.1, 1, 1)	0	0	precuneus	0	0	0.0978585	higher
200	receptor similarity	Receptors	5HT2a	clear	0.457908	0.247262	-0.21796	2127	(0.3, 0.1, 1)	0	0	entorhinal	1	0	0.353443	higher
201	receptor similarity	Cortical expansion	devexp	clear	0.454914	0.22189	-0.190483	124	(0.01, 0.5, 1)	0	0	entorhinal	1	0	0.353443	higher
202	receptor similarity	Receptors	5HT2a	clear	0.450783	0.224632	-0.0812659	1300	(0.01, 0.5, 1)	0	0	precuneus	0	0	0.0978585	higher
203	receptor similarity	metabolism	cbf	syn	0.441955	0.211741	-0.550529	56	(0.01, 3, 1)	0	0	entorhinal	1	0	0.353443	higher
204	receptor similarity	metabolism	cmrglc	syn	0.441805	0.20934	-0.569624	56	(0.01, 3, 1)	0	0	entorhinal	1	0	0.353443	higher
205	receptor similarity	Cortical expansion	scalingpnc	clear	0.440794	0.24663	-0.296528	139	(0.01, 0.5, 1)	0	0	entorhinal	1	0	0.353443	higher
206	receptor similarity	Receptors	mGluR5	clear	0.439835	0.2394	-0.16071	640	(0.3, 0.5, 1)	1	0	precuneus	0	0	0.0978585	higher
207	receptor similarity	Microstructure	myelinmap	mis	0.436421	0.255606	-0.397492	61	(0.1, 3, 1)	0	0	entorhinal	1	0	0.353443	higher
208	receptor similarity	Celltype	OPC	clear	0.43631	0.206236	-0.351193	85	(0.01, 0.9, 1)	0	0	entorhinal	1	0	0.353443	higher
209	receptor similarity	Celltype	Micro	clear	0.434383	0.218268	-0.402939	148	(0.01, 0.5, 1)	0	0	entorhinal	1	0	0.353443	higher
210	receptor similarity	Receptors	NET	mis	0.431706	0.251438	-0.521174	62	(0.01, 3, 1)	0	0	entorhinal	1	0	0.353443	higher
211	receptor similarity	AD-realted	Abeta	clear	0.431024	0.268446	-0.370962	1217	(0.01, 0.1, 0.1)	0	0	entorhinal	1	0	0.353443	higher
212	receptor similarity	AD-realted	APOE	syn	0.429424	0.227708	-0.620544	57	(0.01, 3, 1)	0	0	entorhinal	1	0	0.353443	higher
213	receptor similarity	metabolism	cbv	clear	0.427011	0.204586	-0.51374	128	(0.01, 0.5, 1)	0	0	entorhinal	1	0	0.353443	higher
214	receptor similarity	Cortical expansion	scaling	clear	0.42459	0.256898	-0.427122	122	(0.01, 0.5, 1)	0	0	entorhinal	1	0	0.353443	higher
215	receptor similarity	Receptors	D1	clear	0.423709	0.267508	-0.563814	79	(0.01, 1, 1)	0	0	entorhinal	1	0	0.353443	higher
216	receptor similarity	Cortical expansion	evoexp	clear	0.422888	0.257395	-0.296341	95	(0.01, 0.5, 1)	0	0	entorhinal	1	0	0.353443	higher
217	receptor similarity	Receptors	5HT1b	syn	0.422612	0.223466	-0.593636	57	(0.01, 3, 1)	0	0	entorhinal	1	0	0.353443	higher
218	receptor similarity	Receptors	5HTT	mis	0.419005	0.25042	-0.41195	165	(0.01, 1.5, 1)	0	0	entorhinal	1	0	0.353443	higher
219	receptor similarity	Microstructure	genepc1	mis	0.418874	0.265791	-0.470742	63	(0.3, 3, 1)	0	0	entorhinal	1	0	0.353443	higher
220	receptor similarity	Receptors	GABAa	mis	0.417901	0.246756	-0.538264	58	(0.01, 3, 1)	0	0	entorhinal	1	0	0.353443	higher
221	receptor similarity	Cortical expansion	scalingnih	clear	0.416859	0.26416	-0.447348	117	(0.01, 0.5, 1)	0	0	entorhinal	1	0	0.353443	higher
222	receptor similarity	metabolism	cmr02	mis	0.416449	0.251151	-0.536521	59	(0.01, 3, 1)	0	0	entorhinal	1	0	0.353443	higher
223	receptor similarity	Cortical expansion	scalingnih	mis	0.412178	0.146109	0.000527893	29999	(0.9, 1.5, 0.1)	1	0	precuneus	0	0	0.0978585	higher
224	receptor similarity	Celltype	Astro	mis	0.410099	0.152588	0.0157401	29999	(0.7, 3, 1)	0	0	precuneus	0	0	0.0978585	higher
225	receptor similarity	Celltype	Astro	clear	0.408439	0.233053	-0.490834	78	(0.01, 0.9, 1)	0	0	entorhinal	1	0	0.353443	higher
226	receptor similarity	Cortical expansion	scalinghcp	clear	0.407472	0.2598	-0.493308	112	(0.01, 0.5, 1)	0	0	entorhinal	1	0	0.353443	higher
227	receptor similarity	Receptors	VAChT	mis	0.402838	0.268166	-0.511883	761	(0.01, 1.5, 0.1)	0	0	entorhinal	1	0	0.353443	higher
228	receptor similarity	Receptors	H3	mis	0.401261	0.274139	-0.558959	1111	(0.01, 1, 0.1)	0	0	entorhinal	1	0	0.353443	higher
229	receptor similarity	AD-realted	APOE	mis	0.400688	0.271544	-0.594176	57	(0.01, 3, 1)	0	0	entorhinal	1	0	0.353443	higher
230	receptor similarity	Receptors	A4B2	mis	0.397694	0.279312	-0.568878	821	(0.01, 1, 0.1)	0	0	entorhinal	1	0	0.353443	higher
231	receptor similarity	Receptors	CB1	clear	0.397555	0.287837	-0.532954	973	(0.01, 0.1, 0.1)	0	0	entorhinal	1	0	0.353443	higher
232	receptor similarity	Celltype	Endo	clear	0.396272	0.166091	0.0205066	29999	(0.9, 0.5, 1)	1	0	precuneus	0	0	0.0978585	higher
233	receptor similarity	metabolism	cmrglc	mis	0.394512	0.283874	-0.577142	699	(0.01, 1, 0.1)	0	0	entorhinal	1	0	0.353443	higher
234	receptor similarity	Receptors	5HT1b	mis	0.39347	0.283818	-0.584498	785	(0.01, 0.9, 0.1)	0	0	entorhinal	1	0	0.353443	higher
235	receptor similarity	Celltype	Oligo	mis	0.392216	0.285908	-0.564608	893	(0.01, 0.9, 0.1)	0	0	entorhinal	1	0	0.353443	higher
236	receptor similarity	metabolism	cbf	mis	0.391571	0.28855	-0.574461	1002	(0.01, 0.5, 0.1)	0	0	entorhinal	1	0	0.353443	higher
237	receptor similarity	Cortical expansion	scalinghcp	mis	0.387994	0.198259	0.0386061	29999	(0.9, 2, 0.1)	1	0	precuneus	0	0	0.0978585	higher
238	receptor similarity	Receptors	MOR	clear	0.38729	0.286396	-0.551007	54	(0.01, 1, 1)	0	0	entorhinal	1	0	0.353443	higher
239	receptor similarity	Receptors	5HT4	clear	0.387071	0.294452	-0.569893	961	(0.01, 0.1, 0.1)	0	0	entorhinal	1	0	0.353443	higher
240	receptor similarity	AD-realted	Abeta	mis	0.377001	0.27409	0.0655237	1077	(0.9, 3, 0.1)	0	0	precuneus	0	0	0.0978585	higher
241	receptor similarity	Celltype	OPC	mis	0.367921	0.141569	-0.151676	29999	(0.7, 2, 1)	0	0	precuneus	0	0	0.0978585	higher
242	receptor similarity	AD-realted	MAPT	clear	0.36452	0.304221	-0.670937	982	(0.01, 0.1, 0.1)	0	0	entorhinal	1	0	0.353443	higher
243	receptor similarity	Cortical expansion	scalingnih	syn	0.36226	0.13755	-0.186367	695	(0.9, 0.9, 0.1)	0	0	precuneus	0	1	0.0978585	higher
244	receptor similarity	Microstructure	thickness	clear	0.358262	0.310397	-0.691882	841	(0.01, 0.1, 0.1)	0	0	entorhinal	1	0	0.353443	higher
245	receptor similarity	Receptors	5HT1a	clear	0.354952	0.312072	-0.706345	843	(0.01, 0.1, 0.1)	0	0	entorhinal	1	0	0.353443	higher
246	receptor similarity	Cortical expansion	devexp	syn	0.354424	0.259171	-1.0136	397	(0.9, 0.9, 0.1)	0	0	precuneus	0	0	0.0978585	higher
247	receptor similarity	AD-realted	Abeta	syn	0.353653	0.309762	-0.0740616	645	(0.9, 3, 0.1)	0	0	precuneus	0	0	0.0978585	higher
248	receptor similarity	Receptors	5HT2a	mis	0.353423	0.195165	-0.598966	6943	(0.9, 1, 0.1)	0	0	precuneus	0	0	0.0978585	higher
249	receptor similarity	Receptors	5HT2a	syn	0.336877	0.22192	-0.648105	458	(0.9, 0.9, 0.1)	0	0	precuneus	0	0	0.0978585	higher
250	receptor similarity	Cortical expansion	scaling	mis	0.336703	0.17741	-0.0893922	29999	(0.9, 1.5, 0.1)	1	0	precuneus	0	0	0.0978585	higher
251	receptor similarity	Receptors	CB1	mis	0.336374	0.271247	-0.0178839	29999	(0.9, 3, 1)	1	0	precuneus	0	0	0.0978585	higher
252	receptor similarity	Receptors	MOR	mis	0.328049	0.255089	-0.044047	29999	(0.9, 3, 1)	1	0	precuneus	0	0	0.0978585	higher
253	receptor similarity	Cortical expansion	scalinghcp	syn	0.327715	0.24304	-0.136032	29999	(0.9, 1.5, 0.1)	0	0	precuneus	0	0	0.0978585	higher
254	receptor similarity	Receptors	DAT	mis	0.326992	0.207939	-0.0886941	29999	(0.5, 3, 1)	0	0	precuneus	0	0	0.0978585	higher
255	receptor similarity	Receptors	D2	clear	0.325402	0.316315	-0.640384	64	(0.3, 3, 0.1)	0	0	entorhinal	1	0	0.353443	lower
256	receptor similarity	Receptors	H3	clear	0.320754	0.217176	-0.10572	29999	(0.9, 0.9, 1)	1	0	precuneus	0	1	0.0978585	higher
257	receptor similarity	Receptors	5HTT	mis	0.320559	0.297803	-0.786297	3093	(0.9, 1, 1)	0	0	precuneus	0	0	0.0978585	higher
258	receptor similarity	Receptors	MOR	spread	0.30842	0.338361	-0.147503	4345	(0.3, 3, 0.1)	0	0	precuneus	0	1	0.0978585	higher
259	receptor similarity	Receptors	D1	syn	0.30746	0.255068	-0.29207	29999	(0.9, 3, 1)	1	0	precuneus	0	0	0.0978585	higher
260	receptor similarity	Receptors	5HT1b	spread	0.306788	0.153432	-0.305077	29999	(0.9, 3, 1)	0	0	precuneus	0	0	0.0978585	higher
261	receptor similarity	Cortical expansion	evoexp	mis	0.300165	0.197457	-0.125749	254	(0.9, 3, 0.1)	1	0	precuneus	0	0	0.0978585	higher
262	receptor similarity	Cortical expansion	evoexp	syn	0.297018	0.20616	-0.104521	116	(0.9, 3, 0.1)	0	0	precuneus	0	1	0.0978585	higher
263	receptor similarity	Receptors	CB1	syn	0.295014	0.274303	-0.101804	287	(0.9, 3, 0.1)	0	0	precuneus	0	0	0.0978585	higher
264	receptor similarity	Receptors	A4B2	spread	0.294686	0.201663	-0.474469	29999	(0.9, 3, 1)	0	0	precuneus	0	0	0.0978585	higher
265	receptor similarity	Receptors	MOR	syn	0.288544	0.285927	-0.223141	981	(0.9, 3, 0.1)	0	0	precuneus	0	0	0.0978585	higher
266	receptor similarity	Receptors	CB1	spread	0.276812	0.242007	-0.260698	3249	(0.9, 3, 0.1)	0	0	precuneus	0	1	0.0978585	higher
267	receptor similarity	Cortical expansion	evoexp	spread	0.27006	0.249027	-0.264011	7175	(0.9, 3, 0.1)	0	0	precuneus	0	0	0.0978585	higher
268	receptor similarity	Cortical expansion	scalinghcp	spread	0.257446	0.217838	-0.201062	5649	(0.9, 3, 0.1)	0	0	precuneus	0	1	0.0978585	higher
269	receptor similarity	Cortical expansion	scaling	syn	0.24617	0.157826	-0.451311	267	(0.9, 1.5, 0.1)	0	0	precuneus	0	0	0.0978585	higher
270	receptor similarity	Cortical expansion	scalingnih	spread	0.233315	0.171977	-0.40274	12830	(0.01, 1, 0.1)	0	0	precuneus	0	0	0.0978585	higher
271	receptor similarity	Receptors	D1	mis	0.231679	0.233156	-0.226238	29999	(0.9, 3, 1)	0	0	precuneus	0	0	0.0978585	higher
272	receptor similarity	Receptors	DAT	spread	0.218397	0.271063	-0.380311	1759	(0.1, 3, 0.1)	0	0	precuneus	0	0	0.0978585	higher
273	receptor similarity	Cortical expansion	scaling	spread	0.211129	0.224821	-0.41815	3215	(0.9, 3, 0.1)	0	0	precuneus	0	1	0.0978585	higher
274	receptor similarity	Cortical expansion	devexp	spread	0.208775	0.25137	-0.401274	5297	(0.9, 3, 0.1)	0	0	precuneus	0	1	0.0978585	higher
275	receptor similarity	Receptors	D1	spread	0.196463	0.296787	-0.383388	2923	(0.1, 3, 0.1)	0	0	precuneus	0	1	0.0978585	higher
276	receptor similarity	Receptors	5HT6	spread	0.182829	0.282598	-0.410519	29999	(0.9, 1, 1)	0	0	precuneus	0	1	0.0978585	higher
277	receptor similarity	metabolism	cbv	clear	0.174095	0.36856	-0.34179	29999	(0.9, 3, 1)	1	0	precuneus	0	0	0.0978585	higher
278	receptor similarity	Cortical expansion	scalingpnc	spread	0.169881	0.340627	-0.469864	7332	(0.7, 3, 0.1)	1	0	precuneus	0	1	0.0978585	higher
279	receptor similarity	Receptors	mGluR5	spread	0.168203	0.220691	-0.535197	29999	(0.9, 3, 1)	0	0	precuneus	0	1	0.0978585	higher
280	receptor similarity	Receptors	M1	mis	0.162962	0.243553	-1.88287	572	(0.1, 3, 0.1)	0	0	precuneus	0	0	0.0978585	higher
281	receptor similarity	Celltype	Astro	spread	0.157965	0.202343	-0.785603	1758	(0.5, 3, 0.1)	0	0	precuneus	0	0	0.0978585	higher
282	receptor similarity	Celltype	Neuro-Ex	clear	0.156093	0.173685	-0.632334	29999	(0.9, 0.9, 1)	1	0	precuneus	0	0	0.0978585	higher
283	receptor similarity	Celltype	Micro	syn	0.153343	0.196896	-1.04876	346	(0.3, 2.5, 0.1)	1	0	precuneus	0	0	0.0978585	higher
284	receptor similarity	Microstructure	genepc1	spread	0.140443	0.21556	-0.848927	29999	(0.9, 3, 1)	0	0	precuneus	0	1	0.0978585	higher
285	receptor similarity	Celltype	OPC	spread	0.136737	0.20619	-0.687225	2565	(0.7, 3, 0.1)	0	0	precuneus	0	0	0.0978585	higher
286	receptor similarity	Cortical expansion	scalingpnc	mis	0.135837	0.221909	-0.456988	29999	(0.9, 1.5, 0.1)	0	0	precuneus	0	0	0.0978585	higher
287	receptor similarity	Celltype	Neuro-In	clear	0.129495	0.232634	-0.630034	29999	(0.9, 2, 1)	1	0	precuneus	0	0	0.0978585	higher
288	receptor similarity	Celltype	Neuro-Ex	mis	0.126244	0.313793	-1.17143	339	(0.9, 1.9, 0.1)	0	0	precuneus	0	0	0.0978585	higher
289	receptor similarity	Celltype	Neuro-Ex	syn	0.123112	0.307439	-1.22209	416	(0.9, 0.9, 0.1)	0	0	precuneus	0	1	0.0978585	higher
290	receptor similarity	Celltype	Micro	mis	0.119198	0.233103	-0.46604	29999	(0.9, 3, 1)	0	0	precuneus	0	0	0.0978585	higher
291	receptor similarity	Celltype	Micro	spread	0.117762	0.212813	-0.519367	29999	(0.9, 3, 1)	0	0	precuneus	0	1	0.0978585	higher
292	receptor similarity	metabolism	cmrglc	spread	0.114528	0.25809	-0.546681	29999	(0.9, 3, 1)	0	0	precuneus	0	0	0.0978585	higher
293	receptor similarity	metabolism	cbv	spread	0.0967547	0.255443	-0.470861	29999	(0.9, 3, 1)	0	0	precuneus	0	1	0.0978585	lower
294	receptor similarity	Receptors	5HTT	clear	0.0950592	0.222772	-0.597968	64	(0.9, 3, 0.1)	0	0	precuneus	0	1	0.0978585	lower
295	receptor similarity	Celltype	Neuro-In	spread	0.0902725	0.300393	-0.583778	20476	(0.9, 1.5, 1)	0	0	precuneus	0	1	0.0978585	lower
296	receptor similarity	Receptors	NMDA	clear	0.0736336	0.314943	-1.47744	45	(0.01, 3, 1)	1	0	precuneus	0	0	0.0978585	lower
297	receptor similarity	Cortical expansion	scalingpnc	syn	0.0674847	0.187011	-1.01893	111	(0.9, 3, 0.1)	0	0	precuneus	0	0	0.0978585	lower
298	receptor similarity	Celltype	Neuro-In	mis	0.0649629	0.326735	-2.4966	460	(0.7, 1.9, 0.1)	0	0	precuneus	0	0	0.0978585	lower
299	receptor similarity	Celltype	Neuro-Ex	spread	0.0395564	0.252081	-0.713124	9620	(0.9, 3, 0.1)	0	0	precuneus	0	0	0.0978585	lower
300	receptor similarity	metabolism	cbf	syn	0.0314066	0.256103	-2.07734	6735	(0.01, 0.1, 0.1)	0	0	precuneus	0	0	0.0978585	lower
301	receptor similarity	Celltype	Oligo	mis	0.0313557	0.413894	-1.71802	0	(0.3, 3, 1)	0	0	precuneus	0	0	0.0978585	lower
302	receptor similarity	Cortical expansion	scaling	clear	0.0313553	0.413122	-1.76518	0	(0.9, 0.1, 0.1)	0	0	precuneus	0	0	0.0978585	lower
303	receptor similarity	Receptors	A4B2	syn	0.0313541	0.412932	-1.77739	0	(0.9, 0.1, 0.1)	0	0	precuneus	0	0	0.0978585	lower
304	receptor similarity	Receptors	CB1	clear	0.0313525	0.412755	-1.78901	0	(0.9, 0.1, 0.1)	0	0	precuneus	0	0	0.0978585	lower
305	receptor similarity	Receptors	VAChT	syn	0.0313523	0.414448	-1.68631	0	(0.9, 0.1, 1)	0	0	precuneus	0	0	0.0978585	lower
306	receptor similarity	metabolism	cbv	syn	0.0313512	0.41457	-1.67957	0	(0.9, 0.1, 0.1)	0	0	precuneus	0	0	0.0978585	lower
307	receptor similarity	Receptors	DAT	clear	0.0313475	0.414907	-1.66128	0	(0.9, 0.1, 0.1)	0	0	precuneus	0	0	0.0978585	lower
308	receptor similarity	Cortical expansion	scalingpnc	clear	0.0313463	0.412297	-1.8202	0	(0.9, 0.1, 0.1)	0	0	precuneus	0	0	0.0978585	lower
309	receptor similarity	Celltype	Astro	clear	0.0313458	0.415035	-1.65448	0	(0.9, 0.1, 0.1)	0	0	precuneus	0	0	0.0978585	lower
310	receptor similarity	Microstructure	thickness	clear	0.0313456	0.415054	-1.65346	0	(0.9, 0.1, 0.1)	0	0	precuneus	0	0	0.0978585	lower
311	receptor similarity	Receptors	mGluR5	syn	0.0313425	0.412095	-1.83446	0	(0.9, 0.1, 0.1)	0	0	precuneus	0	0	0.0978585	lower
312	receptor similarity	Cortical expansion	scalinghcp	clear	0.0313406	0.412009	-1.84069	0	(0.9, 0.1, 0.1)	0	0	precuneus	0	0	0.0978585	lower
313	receptor similarity	metabolism	cbf	mis	0.0313385	0.415527	-1.62909	0	(0.9, 3, 1)	0	0	precuneus	0	0	0.0978585	lower
314	receptor similarity	Receptors	NMDA	mis	0.0313383	0.415542	-1.62829	0	(0.9, 3, 1)	0	0	precuneus	0	0	0.0978585	lower
315	receptor similarity	Receptors	M1	syn	0.0313377	0.415578	-1.6265	0	(0.9, 0.1, 0.1)	0	0	precuneus	0	0	0.0978585	lower
316	receptor similarity	Receptors	NET	mis	0.0313374	0.415598	-1.62548	0	(0.9, 3, 1)	0	0	precuneus	0	0	0.0978585	lower
317	receptor similarity	Microstructure	myelinmap	mis	0.0313361	0.415671	-1.62181	0	(0.9, 3, 1)	0	0	precuneus	0	0	0.0978585	lower
318	receptor similarity	Celltype	Endo	syn	0.0313357	0.411806	-1.85556	0	(0.9, 0.1, 0.1)	0	0	precuneus	0	1	0.0978585	lower
319	receptor similarity	Receptors	5HT1b	mis	0.0313353	0.415719	-1.61946	0	(0.9, 3, 1)	0	0	precuneus	0	0	0.0978585	lower
320	receptor similarity	Receptors	H3	mis	0.031335	0.415735	-1.61865	0	(0.9, 3, 1)	0	0	precuneus	0	0	0.0978585	lower
321	receptor similarity	Cortical expansion	scalingnih	clear	0.031335	0.415737	-1.61854	0	(0.9, 0.1, 0.1)	0	0	precuneus	0	0	0.0978585	lower
322	receptor similarity	Receptors	D2	clear	0.0313347	0.415753	-1.61774	0	(0.9, 0.1, 0.1)	0	0	precuneus	0	0	0.0978585	lower
323	receptor similarity	metabolism	cmr02	mis	0.0313338	0.415804	-1.61522	0	(0.9, 3, 0.1)	0	0	precuneus	0	0	0.0978585	lower
324	receptor similarity	metabolism	cmrglc	mis	0.0313333	0.415828	-1.61403	0	(0.9, 3, 0.1)	0	0	precuneus	0	0	0.0978585	lower
325	receptor similarity	Receptors	H3	syn	0.0313324	0.415864	-1.61228	0	(0.01, 0.1, 1)	0	0	precuneus	0	0	0.0978585	lower
326	receptor similarity	Receptors	5HT6	syn	0.0313322	0.415854	-1.61277	0	(0.9, 3, 0.1)	0	0	precuneus	0	0	0.0978585	lower
327	receptor similarity	AD-realted	Cluster3	syn	0.0313321	0.415847	-1.61311	0	(0.9, 3, 0.1)	1	0	precuneus	0	1	0.0978585	lower
328	receptor similarity	Celltype	Endo	spread	0.0313321	0.415847	-1.61311	0	(0.9, 3, 0.1)	0	0	precuneus	0	0	0.0978585	lower
329	receptor similarity	AD-realted	Cluster3	mis	0.0313321	0.415847	-1.61311	0	(0.9, 3, 0.1)	0	0	precuneus	0	0	0.0978585	lower
330	receptor similarity	AD-realted	Cluster2	mis	0.0313321	0.415847	-1.61311	0	(0.9, 3, 0.1)	0	0	precuneus	0	0	0.0978585	lower
331	receptor similarity	AD-realted	Cluster3	clear	0.0313321	0.415847	-1.61311	0	(0.9, 3, 0.1)	0	0	precuneus	0	0	0.0978585	lower
332	receptor similarity	Receptors	5HTT	spread	0.0313321	0.415847	-1.61311	0	(0.9, 3, 0.1)	0	0	precuneus	0	0	0.0978585	lower
333	receptor similarity	AD-realted	Cluster4	clear	0.0313321	0.415847	-1.61311	0	(0.9, 3, 0.1)	0	0	precuneus	0	0	0.0978585	lower
334	receptor similarity	AD-realted	Cluster2	syn	0.0313321	0.415847	-1.61311	0	(0.9, 3, 0.1)	1	0	precuneus	0	1	0.0978585	lower
335	receptor similarity	AD-realted	Cluster2	spread	0.0313321	0.415847	-1.61311	0	(0.9, 3, 0.1)	0	0	precuneus	0	0	0.0978585	lower
336	receptor similarity	AD-realted	Cluster3	spread	0.0313321	0.415847	-1.61311	0	(0.9, 3, 0.1)	0	0	precuneus	0	0	0.0978585	lower
337	receptor similarity	AD-realted	Cluster2	clear	0.0313321	0.415847	-1.61311	0	(0.9, 3, 0.1)	0	0	precuneus	0	0	0.0978585	lower
338	receptor similarity	AD-realted	Cluster4	mis	0.0313321	0.415847	-1.61311	0	(0.9, 3, 0.1)	0	0	precuneus	0	0	0.0978585	lower
339	receptor similarity	AD-realted	Cluster1	spread	0.0313321	0.415847	-1.61311	0	(0.9, 3, 0.1)	0	0	precuneus	0	0	0.0978585	lower
340	receptor similarity	AD-realted	Cluster1	mis	0.0313321	0.415847	-1.61311	0	(0.9, 3, 0.1)	0	0	precuneus	0	0	0.0978585	lower
341	receptor similarity	Receptors	H3	spread	0.0313321	0.415847	-1.61311	0	(0.9, 3, 0.1)	0	0	precuneus	0	0	0.0978585	lower
342	receptor similarity	AD-realted	Cluster1	clear	0.0313321	0.415847	-1.61311	0	(0.9, 3, 0.1)	0	0	precuneus	0	0	0.0978585	lower
343	receptor similarity	Receptors	NMDA	spread	0.0313321	0.415847	-1.61311	0	(0.9, 3, 0.1)	0	0	precuneus	0	0	0.0978585	lower
344	receptor similarity	Receptors	VAChT	spread	0.0313321	0.415847	-1.61311	0	(0.9, 3, 0.1)	0	0	precuneus	0	0	0.0978585	lower
345	receptor similarity	metabolism	cbf	spread	0.0313321	0.415847	-1.61311	0	(0.9, 3, 0.1)	0	0	precuneus	0	0	0.0978585	lower
346	receptor similarity	metabolism	cmr02	spread	0.0313321	0.415847	-1.61311	0	(0.9, 3, 0.1)	0	0	precuneus	0	1	0.0978585	lower
347	receptor similarity	AD-realted	Cluster1	syn	0.0313321	0.415847	-1.61311	0	(0.9, 3, 0.1)	1	0	precuneus	0	1	0.0978585	lower
348	receptor similarity				0.0313321	0.415847	-1.61311	0	(0.9, 3, 0.1)	0	1	precuneus	0	0	0.0978585	lower
349	receptor similarity	AD-realted	Cluster6	spread	0.0313321	0.415847	-1.61311	0	(0.9, 3, 0.1)	0	0	precuneus	0	0	0.0978585	lower
350	receptor similarity	AD-realted	Cluster5	mis	0.0313321	0.415847	-1.61311	0	(0.9, 3, 0.1)	0	0	precuneus	0	0	0.0978585	lower
351	receptor similarity	Celltype	Oligo	spread	0.0313321	0.415847	-1.61311	0	(0.9, 3, 0.1)	0	0	precuneus	0	0	0.0978585	lower
352	receptor similarity	AD-realted	Cluster7	clear	0.0313321	0.415847	-1.61311	0	(0.9, 3, 0.1)	0	0	precuneus	0	0	0.0978585	lower
353	receptor similarity	AD-realted	Cluster6	mis	0.0313321	0.415847	-1.61311	0	(0.9, 3, 0.1)	0	0	precuneus	0	0	0.0978585	lower
354	receptor similarity	AD-realted	Cluster7	mis	0.0313321	0.415847	-1.61311	0	(0.9, 3, 0.1)	0	0	precuneus	0	0	0.0978585	lower
355	receptor similarity	AD-realted	Cluster6	clear	0.0313321	0.415847	-1.61311	0	(0.9, 3, 0.1)	0	0	precuneus	0	0	0.0978585	lower
356	receptor similarity	AD-realted	Cluster5	syn	0.0313321	0.415847	-1.61311	0	(0.9, 3, 0.1)	1	0	precuneus	0	1	0.0978585	lower
357	receptor similarity	AD-realted	Cluster5	spread	0.0313321	0.415847	-1.61311	0	(0.9, 3, 0.1)	0	0	precuneus	0	0	0.0978585	lower
358	receptor similarity	AD-realted	Cluster4	spread	0.0313321	0.415847	-1.61311	0	(0.9, 3, 0.1)	0	0	precuneus	0	0	0.0978585	lower
359	receptor similarity	AD-realted	Cluster6	syn	0.0313321	0.415847	-1.61311	0	(0.9, 3, 0.1)	1	0	precuneus	0	1	0.0978585	lower
360	receptor similarity	AD-realted	Cluster7	spread	0.0313321	0.415847	-1.61311	0	(0.9, 3, 0.1)	0	0	precuneus	0	0	0.0978585	lower
361	receptor similarity	AD-realted	Cluster5	clear	0.0313321	0.415847	-1.61311	0	(0.9, 3, 0.1)	0	0	precuneus	0	0	0.0978585	lower
362	receptor similarity	Microstructure	myelinmap	spread	0.0313321	0.415847	-1.61311	0	(0.9, 3, 0.1)	0	0	precuneus	0	1	0.0978585	lower
363	receptor similarity	AD-realted	Cluster4	syn	0.0313321	0.415847	-1.61311	0	(0.9, 3, 0.1)	1	0	precuneus	0	1	0.0978585	lower
364	receptor similarity	AD-realted	Cluster7	syn	0.0313321	0.415847	-1.61311	0	(0.9, 3, 0.1)	1	0	precuneus	0	1	0.0978585	lower
365	receptor similarity	Receptors	5HT6	mis	0.031332	0.415842	-1.61336	0	(0.9, 3, 0.1)	0	0	precuneus	0	0	0.0978585	lower
366	receptor similarity	AD-realted	APOE	mis	0.031332	0.415841	-1.6134	0	(0.9, 0.1, 0.1)	0	0	precuneus	0	0	0.0978585	lower
367	receptor similarity	Microstructure	genepc1	mis	0.0313319	0.41584	-1.61344	0	(0.9, 0.1, 0.1)	0	0	precuneus	0	0	0.0978585	lower
368	receptor similarity	Receptors	VAChT	mis	0.0313319	0.415838	-1.61357	0	(0.9, 0.1, 0.1)	0	0	precuneus	0	0	0.0978585	lower
369	receptor similarity	metabolism	cbv	mis	0.0313318	0.415831	-1.61388	0	(0.9, 0.1, 0.1)	0	0	precuneus	0	0	0.0978585	lower
370	receptor similarity	Receptors	A4B2	mis	0.0313317	0.415825	-1.61419	0	(0.9, 0.1, 0.1)	0	0	precuneus	0	0	0.0978585	lower
371	receptor similarity	Receptors	mGluR5	mis	0.0313315	0.415815	-1.61468	0	(0.9, 0.1, 0.1)	0	0	precuneus	0	0	0.0978585	lower
372	receptor similarity	Celltype	Endo	mis	0.0313314	0.41581	-1.61495	0	(0.9, 0.1, 0.1)	0	0	precuneus	0	0	0.0978585	lower
373	receptor similarity	Receptors	GABAa	mis	0.0313313	0.415806	-1.61517	0	(0.9, 0.1, 0.1)	0	0	precuneus	0	0	0.0978585	lower
374	receptor similarity	AD-realted	Abeta	clear	0.0313297	0.415724	-1.61923	0	(0.9, 0.1, 0.1)	0	0	precuneus	0	0	0.0978585	lower
375	receptor similarity	Microstructure	genepc1	syn	0.0313268	0.415582	-1.6264	0	(0.9, 3, 0.1)	0	0	precuneus	0	0	0.0978585	lower
376	receptor similarity	AD-realted	APOE	syn	0.0313259	0.415543	-1.6284	0	(0.9, 3, 0.1)	0	0	precuneus	0	0	0.0978585	lower
377	receptor similarity	metabolism	cmrglc	syn	0.0313196	0.415265	-1.64271	0	(0.9, 3, 0.1)	0	0	precuneus	0	0	0.0978585	lower
378	receptor similarity	Celltype	Micro	clear	0.0313179	0.415197	-1.64627	0	(0.01, 3, 1)	0	0	precuneus	0	0	0.0978585	lower
379	receptor similarity	metabolism	cmr02	syn	0.031314	0.415045	-1.65428	0	(0.9, 3, 0.1)	0	0	precuneus	0	0	0.0978585	lower
380	receptor similarity	Receptors	NMDA	syn	0.0313102	0.414908	-1.66161	0	(0.01, 3, 1)	0	0	precuneus	0	1	0.0978585	lower
381	receptor similarity	Cortical expansion	devexp	clear	0.0313076	0.414818	-1.6665	0	(0.01, 3, 1)	0	0	precuneus	0	0	0.0978585	lower
382	receptor similarity	Receptors	NET	syn	0.0313037	0.414686	-1.6737	0	(0.01, 3, 1)	0	0	precuneus	0	0	0.0978585	lower
383	receptor similarity	Receptors	5HT4	clear	0.0313011	0.414604	-1.67824	0	(0.9, 3, 0.1)	0	0	precuneus	0	0	0.0978585	lower
384	receptor similarity	Celltype	OPC	clear	0.0313007	0.410863	-1.93015	0	(0.9, 0.1, 0.1)	0	0	precuneus	0	0	0.0978585	lower
385	receptor similarity	Receptors	GABAa	syn	0.0313002	0.410851	-1.9311	0	(0.9, 0.1, 0.1)	0	0	precuneus	0	0	0.0978585	lower
386	receptor similarity	AD-realted	MAPT	clear	0.0312981	0.414509	-1.68352	0	(0.01, 3, 1)	0	0	precuneus	0	0	0.0978585	lower
387	receptor similarity	Cortical expansion	evoexp	clear	0.0312981	0.414509	-1.68352	0	(0.9, 3, 0.1)	0	0	precuneus	0	0	0.0978585	lower
388	receptor similarity	Receptors	5HT1b	syn	0.0312924	0.414341	-1.69299	0	(0.01, 0.1, 0.1)	0	0	precuneus	0	0	0.0978585	lower
389	receptor similarity	Receptors	D1	clear	0.0312876	0.414209	-1.70054	0	(0.01, 3, 1)	0	0	precuneus	0	0	0.0978585	lower
390	receptor similarity	Microstructure	myelinmap	syn	0.0312805	0.414021	-1.71142	0	(0.9, 3, 0.1)	0	0	precuneus	0	0	0.0978585	lower
391	receptor similarity	Receptors	5HT1a	clear	0.0312784	0.413968	-1.71456	0	(0.01, 3, 1)	0	0	precuneus	0	0	0.0978585	lower
392	receptor similarity	Receptors	MOR	clear	0.031277	0.413934	-1.71656	0	(0.01, 3, 1)	0	0	precuneus	0	0	0.0978585	lower
393	receptor similarity	Celltype	Neuro-In	syn	0.031179	0.409324	-2.07802	0	(0.9, 0.1, 0.1)	0	0	precuneus	0	0	0.0978585	lower
394	receptor similarity	Celltype	Oligo	syn	0.0310928	0.411194	-1.90595	0	(0.01, 3, 1)	0	0	precuneus	0	0	0.0978585	lower
1	laminar similarity	Receptors	D2	syn	0.776542	0.104899	0.590667	124	(0.9, 3, 0.3)	1	0	precuneus	1	1	0.141914	higher
2	laminar similarity	Receptors	D2	mis	0.774285	0.124474	0.593265	281	(0.9, 3, 0.1)	0	0	precuneus	1	0	0.141914	higher
3	laminar similarity	Microstructure	thickness	mis	0.731474	0.140011	0.528236	264	(0.9, 3, 0.1)	1	0	precuneus	1	1	0.141914	higher
4	laminar similarity	Microstructure	thickness	syn	0.725418	0.0965399	0.519512	143	(0.9, 2.9, 0.1)	0	0	precuneus	1	0	0.141914	higher
5	laminar similarity	Receptors	5HT4	mis	0.701185	0.145582	0.337388	326	(0.7, 2.9, 0.1)	1	0	entorhinal	1	1	0.277482	higher
6	laminar similarity	AD-realted	MAPT	mis	0.698904	0.0861613	0.463605	1578	(0.9, 1.5, 0.1)	1	0	entorhinal	1	1	0.277482	higher
7	laminar similarity	AD-realted	MAPT	mis	0.693565	0.0902014	0.461258	1178	(0.9, 1.5, 0.1)	1	0	precuneus	0	1	0.141914	higher
8	laminar similarity	Receptors	5HT1a	spread	0.686403	0.0658923	0.379923	2513	(0.9, 3, 1)	1	0	entorhinal	1	1	0.277482	higher
9	laminar similarity	AD-realted	MAPT	spread	0.680707	0.0677889	0.287134	830	(0.7, 3, 0.1)	0	0	entorhinal	1	0	0.277482	higher
10	laminar similarity	Receptors	5HT1a	spread	0.677007	0.064071	0.351827	2037	(0.9, 3, 0.1)	1	0	precuneus	0	1	0.141914	higher
11	laminar similarity	Receptors	D2	mis	0.662444	0.132039	0.399359	946	(0.9, 1.5, 0.1)	1	0	entorhinal	0	0	0.277482	higher
12	laminar similarity	metabolism	cbf	clear	0.655009	0.0882844	0.397076	307	(0.7, 3, 0.1)	1	0	precuneus	1	1	0.141914	higher
13	laminar similarity	metabolism	cbf	clear	0.648217	0.104585	0.399826	29999	(0.9, 1.5, 0.1)	1	0	entorhinal	0	1	0.277482	higher
14	laminar similarity	AD-realted	MAPT	syn	0.648215	0.0781622	0.350994	315	(0.9, 2, 0.1)	0	0	entorhinal	1	0	0.277482	higher
15	laminar similarity	Receptors	5HT4	spread	0.642542	0.12696	0.354664	1083	(0.9, 3, 1)	0	0	entorhinal	1	0	0.277482	higher
16	laminar similarity	Receptors	5HT1a	syn	0.642433	0.148559	0.352844	157	(0.9, 3, 0.1)	0	0	precuneus	1	0	0.141914	higher
17	laminar similarity	Receptors	D2	spread	0.63528	0.109386	0.000691479	690	(0.01, 0.9, 1)	0	0	precuneus	1	0	0.141914	higher
18	laminar similarity	Receptors	5HT4	syn	0.634882	0.123774	0.301615	540	(0.9, 1, 0.1)	0	0	entorhinal	1	0	0.277482	higher
19	laminar similarity	Receptors	5HT4	mis	0.626158	0.0958011	0.352094	443	(0.9, 2.5, 0.5)	1	0	precuneus	0	1	0.141914	higher
20	laminar similarity	Microstructure	thickness	spread	0.617451	0.117732	0.284692	1525	(0.9, 3, 1)	1	0	entorhinal	1	0	0.277482	higher
21	laminar similarity	Receptors	5HT1a	mis	0.615271	0.155728	0.261381	101	(0.5, 3, 1)	0	0	precuneus	1	0	0.141914	higher
22	laminar similarity	AD-realted	MAPT	syn	0.614644	0.114349	0.349105	551	(0.9, 1, 0.1)	0	0	precuneus	0	0	0.141914	higher
23	laminar similarity	Receptors	D2	spread	0.612702	0.0759603	0.216224	3142	(0.9, 3, 1)	0	0	entorhinal	0	0	0.277482	higher
24	laminar similarity	Cortical expansion	scalingnih	syn	0.60871	0.148729	0.103051	168	(0.9, 1.9, 1)	1	0	entorhinal	1	1	0.277482	higher
25	laminar similarity	Receptors	D2	syn	0.594742	0.138999	0.29255	640	(0.9, 0.9, 0.1)	0	0	entorhinal	0	1	0.277482	higher
26	laminar similarity	Microstructure	thickness	spread	0.579534	0.0916612	0.148849	5000	(0.9, 3, 0.1)	0	0	precuneus	0	0	0.141914	higher
27	laminar similarity	Receptors	5HT4	syn	0.572648	0.108913	0.212433	286	(0.9, 3, 0.1)	0	0	precuneus	0	0	0.141914	higher
28	laminar similarity	AD-realted	MAPT	spread	0.570785	0.238824	0.153161	3003	(0.5, 3, 0.1)	0	0	precuneus	0	0	0.141914	higher
29	laminar similarity	Cortical expansion	scalingnih	mis	0.569659	0.194792	-0.0400484	191	(0.9, 3, 1)	0	0	entorhinal	1	0	0.277482	higher
30	laminar similarity	Receptors	5HT4	spread	0.56819	0.0902247	0.167008	5420	(0.9, 3, 0.1)	0	0	precuneus	0	0	0.141914	higher
31	laminar similarity	Receptors	MOR	spread	0.568168	0.150846	0.102388	1294	(0.9, 3, 1)	1	0	entorhinal	1	1	0.277482	higher
32	laminar similarity	Cortical expansion	scaling	syn	0.564402	0.139676	0.0368583	110	(0.9, 2.9, 1)	1	0	entorhinal	1	1	0.277482	higher
33	laminar similarity	Cortical expansion	scalinghcp	syn	0.560441	0.234235	-0.436237	223	(0.9, 0.9, 1)	1	0	entorhinal	1	1	0.277482	higher
34	laminar similarity	Receptors	5HT1b	clear	0.554927	0.113879	0.222688	439	(0.9, 3, 0.1)	1	0	entorhinal	1	1	0.277482	higher
35	laminar similarity	Receptors	5HT1b	clear	0.552655	0.112344	0.21143	390	(0.9, 3, 0.1)	1	0	precuneus	0	1	0.141914	higher
36	laminar similarity	Celltype	Oligo	clear	0.54377	0.168086	-0.350092	774	(0.1, 0.5, 0.5)	1	0	precuneus	1	1	0.141914	higher
37	laminar similarity	Celltype	Oligo	clear	0.538336	0.179612	-0.0700887	458	(0.5, 0.5, 1)	1	0	entorhinal	0	1	0.277482	higher
38	laminar similarity	metabolism	cmrglc	clear	0.534145	0.147379	0.228989	29999	(0.9, 3, 0.1)	1	0	precuneus	1	1	0.141914	higher
39	laminar similarity	metabolism	cmrglc	clear	0.534138	0.147277	0.228901	29999	(0.9, 3, 0.1)	1	0	entorhinal	0	1	0.277482	higher
40	laminar similarity	Receptors	VAChT	clear	0.530029	0.235569	-0.547825	125	(0.7, 0.5, 1)	1	0	entorhinal	1	1	0.277482	higher
41	laminar similarity	Cortical expansion	scalinghcp	mis	0.518913	0.178293	-0.0319846	186	(0.9, 3, 1)	0	0	entorhinal	1	0	0.277482	higher
42	laminar similarity	Receptors	CB1	spread	0.517384	0.140609	0.0413046	1171	(0.9, 3, 1)	1	0	entorhinal	1	1	0.277482	higher
43	laminar similarity	Receptors	NET	clear	0.514385	0.147248	0.139712	562	(0.9, 3, 0.1)	1	0	precuneus	1	1	0.141914	higher
44	laminar similarity	Receptors	NET	clear	0.511584	0.180687	0.137032	29999	(0.9, 3, 1)	1	0	entorhinal	0	1	0.277482	higher
45	laminar similarity	Cortical expansion	scalinghcp	spread	0.504973	0.116805	-0.151989	382	(0.01, 0.9, 0.9)	0	0	entorhinal	1	0	0.277482	higher
46	laminar similarity	Receptors	5HTT	clear	0.502795	0.255054	-0.769205	109	(0.5, 1.5, 0.1)	1	0	entorhinal	1	1	0.277482	higher
47	laminar similarity	Receptors	A4B2	clear	0.501208	0.162698	0.117281	115	(0.9, 1.5, 0.1)	1	0	entorhinal	1	1	0.277482	higher
48	laminar similarity	Cortical expansion	scaling	mis	0.497354	0.197485	-0.0831774	260	(0.9, 3, 0.1)	0	0	entorhinal	1	0	0.277482	higher
49	laminar similarity	Cortical expansion	scaling	spread	0.4899	0.122365	-0.150012	1498	(0.01, 0.5, 1)	0	0	entorhinal	1	0	0.277482	higher
50	laminar similarity	Receptors	MOR	spread	0.483058	0.103448	-0.106091	6959	(0.9, 3, 0.1)	1	0	precuneus	0	1	0.141914	higher
51	laminar similarity	Cortical expansion	scalingnih	spread	0.478658	0.144057	-0.361744	1770	(0.01, 0.5, 1)	0	0	entorhinal	1	0	0.277482	higher
52	laminar similarity	Receptors	5HT1a	mis	0.476859	0.154668	0.089021	2369	(0.9, 1.5, 0.1)	0	0	entorhinal	0	0	0.277482	higher
53	laminar similarity	Cortical expansion	evoexp	spread	0.467162	0.169916	-0.047416	1142	(0.9, 3, 1)	1	0	entorhinal	1	1	0.277482	higher
54	laminar similarity	Microstructure	thickness	mis	0.462995	0.156919	-0.028955	907	(0.9, 1.5, 0.1)	0	0	entorhinal	0	1	0.277482	higher
55	laminar similarity	Receptors	H3	clear	0.454929	0.168214	0.0520568	77	(0.9, 3, 0.1)	1	0	entorhinal	1	1	0.277482	higher
56	laminar similarity	metabolism	cmr02	clear	0.451572	0.179806	0.0501862	1255	(0.9, 3, 0.1)	1	0	entorhinal	1	1	0.277482	higher
57	laminar similarity	Receptors	A4B2	clear	0.437053	0.162875	0.0556551	197	(0.9, 0.9, 0.1)	1	0	precuneus	0	1	0.141914	higher
58	laminar similarity	Receptors	5HT1a	syn	0.429052	0.207408	-0.0906069	221	(0.9, 1.5, 0.1)	0	0	entorhinal	0	0	0.277482	higher
59	laminar similarity	Receptors	CB1	spread	0.420732	0.113985	-0.168891	6018	(0.9, 3, 0.1)	1	0	precuneus	0	1	0.141914	higher
60	laminar similarity	Cortical expansion	evoexp	syn	0.419643	0.189052	-0.154521	117	(0.9, 3, 0.1)	1	0	precuneus	1	0	0.141914	higher
61	laminar similarity	Cortical expansion	evoexp	mis	0.417131	0.193459	-0.228404	255	(0.9, 3, 0.1)	0	0	precuneus	1	0	0.141914	higher
62	laminar similarity	AD-realted	Abeta	spread	0.408763	0.187377	-0.150193	1117	(0.9, 3, 0.5)	1	0	entorhinal	1	1	0.277482	higher
63	laminar similarity	Microstructure	thickness	syn	0.40264	0.200705	-0.182967	220	(0.9, 1.5, 0.1)	0	0	entorhinal	0	0	0.277482	higher
64	laminar similarity	Receptors	GABAa	clear	0.398758	0.13497	-0.130647	297	(0.9, 3, 1)	1	0	entorhinal	1	1	0.277482	higher
65	laminar similarity	Receptors	GABAa	clear	0.393827	0.140331	-0.12658	340	(0.9, 3, 1)	1	0	precuneus	0	1	0.141914	higher
66	laminar similarity	metabolism	cmr02	clear	0.392428	0.2006	-0.399363	40	(0.01, 3, 1)	1	0	precuneus	0	1	0.141914	higher
67	laminar similarity	Cortical expansion	devexp	mis	0.386712	0.263423	-1.15696	214	(0.9, 2.9, 0.1)	1	0	precuneus	1	1	0.141914	higher
68	laminar similarity	Cortical expansion	evoexp	spread	0.384775	0.133609	-0.165926	29999	(0.9, 3, 1)	0	0	precuneus	0	1	0.141914	higher
69	laminar similarity	AD-realted	Abeta	spread	0.380902	0.210868	-0.102485	3532	(0.9, 3, 1)	1	0	precuneus	0	1	0.141914	higher
70	laminar similarity	AD-realted	APOE	clear	0.378626	0.218253	-0.420049	37	(0.01, 3, 1)	1	0	precuneus	1	1	0.141914	higher
71	laminar similarity	AD-realted	APOE	clear	0.368328	0.215489	-0.023897	869	(0.9, 3, 0.1)	1	0	entorhinal	0	1	0.277482	higher
72	laminar similarity	Celltype	Oligo	syn	0.364887	0.237511	-0.407289	6621	(0.01, 0.1, 0.1)	0	0	entorhinal	1	0	0.277482	higher
73	laminar similarity	Receptors	M1	clear	0.362574	0.218291	-0.218668	29999	(0.9, 0.1, 1)	1	0	entorhinal	1	1	0.277482	higher
74	laminar similarity	Receptors	M1	clear	0.361792	0.203393	-0.388242	276	(0.01, 0.5, 1)	1	0	precuneus	0	1	0.141914	higher
75	laminar similarity	Cortical expansion	devexp	mis	0.361193	0.244899	-0.402518	95	(0.9, 3, 0.1)	1	0	entorhinal	0	1	0.277482	higher
76	laminar similarity	Receptors	5HT6	clear	0.360905	0.165525	-0.29328	1051	(0.01, 0.5, 1)	1	0	precuneus	1	1	0.141914	higher
77	laminar similarity	Receptors	5HT6	clear	0.36058	0.165409	-0.292352	4462	(0.01, 0.5, 0.1)	1	0	entorhinal	0	1	0.277482	higher
78	laminar similarity	Cortical expansion	devexp	syn	0.348528	0.260444	-0.547915	61	(0.9, 3, 0.1)	0	0	entorhinal	1	0	0.277482	higher
79	laminar similarity	metabolism	cbv	spread	0.348103	0.227157	-0.455792	239	(0.01, 1.5, 0.3)	1	0	entorhinal	1	1	0.277482	higher
80	laminar similarity	Cortical expansion	devexp	syn	0.346221	0.267254	-1.22739	94	(0.9, 3, 0.1)	0	0	precuneus	0	0	0.141914	higher
81	laminar similarity	Receptors	VAChT	syn	0.345898	0.265305	-0.678866	6627	(0.01, 0.1, 0.1)	0	0	entorhinal	1	0	0.277482	higher
82	laminar similarity	Receptors	mGluR5	clear	0.341769	0.208275	-0.322548	251	(0.1, 0.5, 1)	1	0	entorhinal	1	1	0.277482	higher
83	laminar similarity	Receptors	H3	syn	0.341416	0.274194	-0.729902	1101	(0.01, 0.1, 1)	0	0	entorhinal	1	0	0.277482	higher
84	laminar similarity	Receptors	A4B2	syn	0.340285	0.28106	-0.761255	1112	(0.01, 0.1, 1)	0	0	entorhinal	1	0	0.277482	higher
85	laminar similarity	Celltype	Endo	clear	0.339763	0.187496	-0.0885034	63	(0.9, 3, 1)	1	0	precuneus	1	1	0.141914	higher
86	laminar similarity	Receptors	5HTT	syn	0.333975	0.235009	-0.55269	599	(0.01, 0.1, 0.1)	0	0	entorhinal	1	0	0.277482	higher
87	laminar similarity	Cortical expansion	evoexp	clear	0.331545	0.219468	-0.350619	96	(0.01, 0.5, 1)	0	0	entorhinal	1	0	0.277482	higher
88	laminar similarity	Receptors	mGluR5	clear	0.327325	0.201623	-0.344422	2139	(0.1, 0.5, 0.1)	1	0	precuneus	0	1	0.141914	higher
89	laminar similarity	Celltype	Astro	mis	0.326988	0.305737	-1.0023	127	(0.9, 3, 0.1)	1	0	precuneus	1	1	0.141914	higher
90	laminar similarity	Celltype	Astro	syn	0.326746	0.30784	-0.99236	75	(0.9, 3, 0.1)	0	0	precuneus	1	0	0.141914	higher
91	laminar similarity	metabolism	cbv	mis	0.325528	0.213956	-0.571699	129	(0.01, 1.5, 1)	0	0	entorhinal	1	0	0.277482	higher
92	laminar similarity	Receptors	5HT1b	syn	0.32484	0.284358	-0.766392	1099	(0.01, 0.1, 1)	0	0	entorhinal	1	0	0.277482	higher
93	laminar similarity	Cortical expansion	scalingpnc	spread	0.324342	0.192354	-0.285792	461	(0.9, 3, 1)	1	0	entorhinal	1	1	0.277482	higher
94	laminar similarity	metabolism	cbf	syn	0.324232	0.280814	-0.775568	1099	(0.01, 0.1, 1)	0	0	entorhinal	1	0	0.277482	higher
95	laminar similarity	Receptors	H3	clear	0.323321	0.276551	0.0164262	29999	(0.9, 0.9, 0.1)	1	0	precuneus	0	1	0.141914	higher
96	laminar similarity	Receptors	NMDA	clear	0.323078	0.189448	-0.61796	423	(0.01, 0.5, 0.3)	1	0	entorhinal	1	1	0.277482	higher
97	laminar similarity	Microstructure	genepc1	clear	0.322088	0.250156	-0.638598	69	(0.01, 0.1, 1)	1	0	entorhinal	1	1	0.277482	higher
98	laminar similarity	Celltype	Neuro-Ex	mis	0.321878	0.257517	-0.708184	2253	(0.9, 1, 0.1)	1	0	entorhinal	1	1	0.277482	higher
99	laminar similarity	Microstructure	genepc1	syn	0.320098	0.203095	-0.832722	211	(0.01, 0.9, 1)	0	0	entorhinal	1	0	0.277482	higher
100	laminar similarity	Receptors	VAChT	clear	0.319415	0.20364	-0.060644	5680	(0.9, 0.5, 0.1)	1	0	precuneus	0	1	0.141914	higher
101	laminar similarity	metabolism	cmrglc	syn	0.317082	0.283216	-0.780459	1099	(0.01, 0.1, 1)	0	0	entorhinal	1	0	0.277482	higher
102	laminar similarity	Receptors	MOR	syn	0.315578	0.264861	-0.644129	80	(0.01, 0.1, 1)	0	0	entorhinal	1	0	0.277482	higher
103	laminar similarity	Receptors	NET	syn	0.31557	0.283927	-0.801198	1090	(0.01, 0.1, 1)	0	0	entorhinal	1	0	0.277482	higher
104	laminar similarity	Receptors	D1	spread	0.315149	0.242233	-0.594746	85	(0.01, 0.1, 1)	1	0	entorhinal	1	1	0.277482	higher
105	laminar similarity	Microstructure	myelinmap	clear	0.314137	0.260707	-0.70056	68	(0.01, 0.1, 1)	1	0	entorhinal	1	1	0.277482	higher
106	laminar similarity	AD-realted	Abeta	mis	0.313525	0.155974	-0.279783	319	(0.9, 3, 0.1)	0	0	precuneus	1	0	0.141914	higher
107	laminar similarity	Receptors	CB1	mis	0.313363	0.300177	-1.65608	161	(0.9, 3, 0.1)	0	0	precuneus	1	0	0.141914	higher
108	laminar similarity	Cortical expansion	evoexp	syn	0.312927	0.275604	-0.568467	444	(0.01, 0.1, 0.1)	0	0	entorhinal	0	0	0.277482	higher
109	laminar similarity	Celltype	Astro	spread	0.312109	0.254995	-0.586906	134	(0.01, 0.5, 1)	1	0	entorhinal	1	0	0.277482	higher
110	laminar similarity	AD-realted	Abeta	mis	0.311889	0.255771	-0.467974	84	(0.9, 3, 0.1)	0	0	entorhinal	0	0	0.277482	higher
111	laminar similarity	Receptors	mGluR5	syn	0.311283	0.284953	-0.772503	112	(0.01, 0.1, 1)	0	0	entorhinal	1	0	0.277482	higher
112	laminar similarity	Cortical expansion	scalingpnc	clear	0.311144	0.274161	-0.868037	214	(0.7, 0.1, 1)	0	0	entorhinal	1	0	0.277482	higher
113	laminar similarity	Receptors	DAT	spread	0.310062	0.264144	-0.6815	80	(0.01, 1, 1)	1	0	entorhinal	1	1	0.277482	higher
114	laminar similarity	Celltype	Endo	clear	0.309979	0.169954	-0.173066	104	(0.9, 3, 0.1)	1	0	entorhinal	0	1	0.277482	higher
115	laminar similarity	metabolism	cbv	clear	0.309847	0.277029	-0.762242	55	(0.01, 0.1, 1)	0	0	entorhinal	1	0	0.277482	higher
116	laminar similarity	AD-realted	APOE	syn	0.308826	0.255707	-0.902812	1422	(0.01, 0.9, 0.1)	0	0	entorhinal	1	0	0.277482	higher
117	laminar similarity	Receptors	DAT	mis	0.308696	0.258907	-0.715703	59	(0.01, 1.5, 1)	0	0	entorhinal	1	0	0.277482	higher
118	laminar similarity	Celltype	Neuro-In	spread	0.308358	0.238491	-0.521483	150	(0.9, 3, 0.1)	1	0	entorhinal	1	1	0.277482	higher
119	laminar similarity	Receptors	CB1	syn	0.308019	0.252628	-0.922202	84	(0.9, 3, 0.7)	0	0	precuneus	1	0	0.141914	higher
120	laminar similarity	Cortical expansion	scalinghcp	clear	0.307974	0.27357	-0.780927	55	(0.01, 0.1, 1)	0	0	entorhinal	1	0	0.277482	higher
121	laminar similarity	Cortical expansion	scaling	clear	0.307674	0.266087	-0.747574	58	(0.01, 0.1, 1)	0	0	entorhinal	1	0	0.277482	higher
122	laminar similarity	Receptors	NMDA	syn	0.306583	0.27313	-0.736574	107	(0.01, 0.1, 1)	0	0	entorhinal	1	0	0.277482	higher
123	laminar similarity	Cortical expansion	devexp	spread	0.306508	0.177915	-0.195397	333	(0.9, 3, 1)	0	0	entorhinal	1	0	0.277482	higher
124	laminar similarity	Microstructure	myelinmap	syn	0.306331	0.210977	-0.91821	517	(0.01, 0.9, 0.3)	0	0	entorhinal	1	0	0.277482	higher
125	laminar similarity	Cortical expansion	scalingnih	clear	0.3052	0.27074	-0.773683	54	(0.01, 0.1, 1)	0	0	entorhinal	1	0	0.277482	higher
126	laminar similarity	Celltype	Micro	clear	0.305057	0.268903	-0.739044	73	(0.01, 0.1, 1)	1	0	entorhinal	1	1	0.277482	higher
127	laminar similarity	Receptors	5HT2a	clear	0.304324	0.232875	-0.474402	516	(0.01, 0.5, 0.3)	1	0	precuneus	1	1	0.141914	higher
128	laminar similarity	Cortical expansion	scalinghcp	mis	0.304323	0.195821	-0.109935	29999	(0.9, 1.9, 0.1)	1	0	precuneus	0	0	0.141914	higher
129	laminar similarity	Receptors	5HT2a	clear	0.303375	0.259032	-0.451284	603	(0.7, 0.1, 1)	1	0	entorhinal	0	1	0.277482	higher
130	laminar similarity	Cortical expansion	devexp	clear	0.303011	0.247786	-0.632977	72	(0.01, 0.1, 1)	0	0	entorhinal	1	0	0.277482	higher
131	laminar similarity	Celltype	Neuro-In	syn	0.302681	0.264292	-0.7167	77	(0.01, 0.1, 1)	0	0	entorhinal	1	0	0.277482	higher
132	laminar similarity	Receptors	D1	mis	0.302557	0.266587	-0.760473	55	(0.01, 0.9, 1)	0	0	entorhinal	1	0	0.277482	higher
133	laminar similarity	Receptors	GABAa	syn	0.302117	0.289052	-0.826365	111	(0.01, 0.1, 1)	0	0	entorhinal	1	0	0.277482	higher
134	laminar similarity	Celltype	OPC	syn	0.302086	0.266797	-0.754272	70	(0.01, 0.1, 1)	1	0	entorhinal	1	1	0.277482	higher
135	laminar similarity	Receptors	CB1	syn	0.301742	0.277846	-0.792687	78	(0.01, 0.1, 1)	0	0	entorhinal	0	0	0.277482	higher
136	laminar similarity	AD-realted	Abeta	clear	0.300378	0.238485	-0.561795	116	(0.01, 0.5, 1)	0	0	entorhinal	1	0	0.277482	higher
137	laminar similarity	AD-realted	Abeta	syn	0.300317	0.270772	-0.538875	60	(0.9, 3, 0.1)	0	0	entorhinal	1	0	0.277482	higher
138	laminar similarity	Receptors	M1	syn	0.30007	0.286891	-0.803794	94	(0.01, 0.1, 1)	0	0	entorhinal	1	0	0.277482	higher
139	laminar similarity	Receptors	DAT	syn	0.300037	0.262701	-0.730433	66	(0.01, 0.1, 1)	0	0	entorhinal	1	0	0.277482	higher
140	laminar similarity	metabolism	cmr02	syn	0.299937	0.251646	-0.950251	1576	(0.01, 0.9, 0.1)	0	0	entorhinal	1	0	0.277482	higher
141	laminar similarity	Celltype	Endo	syn	0.299915	0.267641	-0.913109	9794	(0.9, 0.5, 0.1)	0	0	entorhinal	1	0	0.277482	higher
142	laminar similarity	Celltype	Neuro-In	mis	0.299773	0.273278	-0.765456	75	(0.01, 0.1, 1)	0	0	entorhinal	1	0	0.277482	higher
143	laminar similarity	AD-realted	Cluster5	clear	0.299758	0.272173	-0.759897	73	(0.01, 0.1, 1)	0	0	entorhinal	1	0	0.277482	higher
144	laminar similarity	AD-realted	Cluster4	spread	0.299758	0.272173	-0.759897	73	(0.01, 0.1, 1)	0	0	entorhinal	1	0	0.277482	higher
145	laminar similarity	AD-realted	Cluster7	mis	0.299758	0.272173	-0.759897	73	(0.01, 0.1, 1)	0	0	entorhinal	1	0	0.277482	higher
146	laminar similarity	AD-realted	Cluster5	mis	0.299758	0.272173	-0.759897	73	(0.01, 0.1, 1)	0	0	entorhinal	1	0	0.277482	higher
147	laminar similarity	AD-realted	Cluster4	mis	0.299758	0.272173	-0.759897	73	(0.01, 0.1, 1)	0	0	entorhinal	1	0	0.277482	higher
148	laminar similarity	AD-realted	Cluster7	clear	0.299758	0.272173	-0.759897	73	(0.01, 0.1, 1)	0	0	entorhinal	1	0	0.277482	higher
149	laminar similarity	AD-realted	Cluster6	syn	0.299758	0.272173	-0.759897	73	(0.01, 0.1, 1)	1	0	entorhinal	1	1	0.277482	higher
150	laminar similarity	AD-realted	Cluster5	spread	0.299758	0.272173	-0.759897	73	(0.01, 0.1, 1)	0	0	entorhinal	1	0	0.277482	higher
151	laminar similarity	AD-realted	Cluster6	clear	0.299758	0.272173	-0.759897	73	(0.01, 0.1, 1)	0	0	entorhinal	1	0	0.277482	higher
152	laminar similarity	AD-realted	Cluster3	spread	0.299758	0.272173	-0.759897	73	(0.01, 0.1, 1)	0	0	entorhinal	1	0	0.277482	higher
153	laminar similarity	AD-realted	Cluster3	syn	0.299758	0.272173	-0.759897	73	(0.01, 0.1, 1)	1	0	entorhinal	1	1	0.277482	higher
154	laminar similarity	AD-realted	Cluster6	spread	0.299758	0.272173	-0.759897	73	(0.01, 0.1, 1)	0	0	entorhinal	1	0	0.277482	higher
155	laminar similarity	AD-realted	Cluster4	clear	0.299758	0.272173	-0.759897	73	(0.01, 0.1, 1)	0	0	entorhinal	1	0	0.277482	higher
156	laminar similarity	AD-realted	Cluster5	syn	0.299758	0.272173	-0.759897	73	(0.01, 0.1, 1)	1	0	entorhinal	1	1	0.277482	higher
157	laminar similarity	AD-realted	Cluster7	spread	0.299758	0.272173	-0.759897	73	(0.01, 0.1, 1)	0	0	entorhinal	1	0	0.277482	higher
158	laminar similarity	AD-realted	Cluster4	syn	0.299758	0.272173	-0.759897	73	(0.01, 0.1, 1)	1	0	entorhinal	1	1	0.277482	higher
159	laminar similarity	AD-realted	Cluster6	mis	0.299758	0.272173	-0.759897	73	(0.01, 0.1, 1)	0	0	entorhinal	1	0	0.277482	higher
160	laminar similarity	AD-realted	Cluster7	syn	0.299758	0.272173	-0.759897	73	(0.01, 0.1, 1)	1	0	entorhinal	1	1	0.277482	higher
161	laminar similarity	AD-realted	Cluster3	mis	0.299758	0.272173	-0.759897	73	(0.01, 0.1, 1)	0	0	entorhinal	1	0	0.277482	higher
162	laminar similarity				0.299758	0.272173	-0.759897	73	(0.01, 0.1, 1)	0	1	entorhinal	1	0	0.277482	higher
163	laminar similarity	AD-realted	Cluster1	clear	0.299758	0.272173	-0.759897	73	(0.01, 0.1, 1)	0	0	entorhinal	1	0	0.277482	higher
164	laminar similarity	AD-realted	Cluster1	spread	0.299758	0.272173	-0.759897	73	(0.01, 0.1, 1)	0	0	entorhinal	1	0	0.277482	higher
165	laminar similarity	AD-realted	Cluster1	mis	0.299758	0.272173	-0.759897	73	(0.01, 0.1, 1)	0	0	entorhinal	1	0	0.277482	higher
166	laminar similarity	AD-realted	Cluster2	clear	0.299758	0.272173	-0.759897	73	(0.01, 0.1, 1)	0	0	entorhinal	1	0	0.277482	higher
167	laminar similarity	AD-realted	Cluster2	mis	0.299758	0.272173	-0.759897	73	(0.01, 0.1, 1)	0	0	entorhinal	1	0	0.277482	higher
168	laminar similarity	AD-realted	Cluster2	spread	0.299758	0.272173	-0.759897	73	(0.01, 0.1, 1)	0	0	entorhinal	1	0	0.277482	higher
169	laminar similarity	AD-realted	Cluster2	syn	0.299758	0.272173	-0.759897	73	(0.01, 0.1, 1)	1	0	entorhinal	1	1	0.277482	higher
170	laminar similarity	AD-realted	Cluster1	syn	0.299758	0.272173	-0.759897	73	(0.01, 0.1, 1)	1	0	entorhinal	1	1	0.277482	higher
171	laminar similarity	AD-realted	Cluster3	clear	0.299758	0.272173	-0.759897	73	(0.01, 0.1, 1)	0	0	entorhinal	1	0	0.277482	higher
172	laminar similarity	Receptors	CB1	mis	0.299689	0.273711	-0.777302	72	(0.01, 0.1, 1)	0	0	entorhinal	0	0	0.277482	higher
173	laminar similarity	Celltype	OPC	mis	0.299669	0.273112	-0.763577	75	(0.01, 0.1, 1)	0	0	entorhinal	1	0	0.277482	higher
174	laminar similarity	Receptors	MOR	clear	0.299633	0.24716	-0.686278	78	(0.01, 0.5, 1)	0	0	entorhinal	1	0	0.277482	higher
175	laminar similarity	Receptors	NMDA	mis	0.29958	0.273653	-0.77227	73	(0.01, 0.1, 1)	0	0	entorhinal	1	0	0.277482	higher
176	laminar similarity	Receptors	5HT2a	mis	0.299389	0.273326	-0.768604	73	(0.01, 0.1, 1)	0	0	entorhinal	1	0	0.277482	higher
177	laminar similarity	Celltype	Micro	mis	0.299348	0.273365	-0.765124	75	(0.01, 0.1, 1)	0	0	entorhinal	1	0	0.277482	higher
178	laminar similarity	Receptors	5HT6	mis	0.299271	0.273634	-0.768409	72	(0.01, 0.1, 1)	0	0	entorhinal	1	0	0.277482	higher
179	laminar similarity	Receptors	5HTT	mis	0.299132	0.27373	-0.766026	74	(0.01, 0.1, 1)	0	0	entorhinal	1	0	0.277482	higher
180	laminar similarity	Receptors	M1	mis	0.299111	0.273778	-0.770022	72	(0.01, 0.1, 1)	0	0	entorhinal	1	0	0.277482	higher
181	laminar similarity	Receptors	MOR	mis	0.299064	0.274246	-0.774715	71	(0.01, 0.1, 1)	0	0	entorhinal	1	0	0.277482	higher
182	laminar similarity	Receptors	5HT6	syn	0.299047	0.288755	-0.837737	102	(0.01, 0.1, 1)	0	0	entorhinal	1	0	0.277482	higher
183	laminar similarity	Celltype	OPC	spread	0.299015	0.267447	-0.718483	208	(0.01, 0.1, 1)	0	0	entorhinal	1	0	0.277482	higher
184	laminar similarity	Receptors	GABAa	mis	0.298925	0.273903	-0.770376	72	(0.01, 0.1, 1)	0	0	entorhinal	1	0	0.277482	higher
185	laminar similarity	Celltype	Endo	mis	0.298878	0.273762	-0.765779	74	(0.01, 0.1, 1)	0	0	entorhinal	1	0	0.277482	higher
186	laminar similarity	Cortical expansion	evoexp	mis	0.298796	0.273922	-0.771675	72	(0.01, 0.1, 1)	0	0	entorhinal	0	0	0.277482	higher
187	laminar similarity	metabolism	cmr02	mis	0.29875	0.273955	-0.770333	72	(0.01, 0.1, 1)	0	0	entorhinal	1	0	0.277482	higher
188	laminar similarity	Receptors	mGluR5	mis	0.298726	0.274232	-0.772967	71	(0.01, 0.1, 1)	0	0	entorhinal	1	0	0.277482	higher
189	laminar similarity	Celltype	Micro	syn	0.298647	0.273274	-0.77617	63	(0.01, 0.1, 1)	0	0	entorhinal	1	0	0.277482	higher
190	laminar similarity	metabolism	cbv	syn	0.298565	0.298149	-1.0815	51	(0.7, 3, 1)	0	0	entorhinal	1	0	0.277482	higher
191	laminar similarity	Receptors	VAChT	mis	0.298373	0.274917	-0.777264	70	(0.01, 0.1, 1)	0	0	entorhinal	1	0	0.277482	higher
192	laminar similarity	AD-realted	APOE	mis	0.298356	0.27441	-0.772042	71	(0.01, 0.1, 1)	0	0	entorhinal	1	0	0.277482	higher
193	laminar similarity	AD-realted	MAPT	clear	0.298134	0.290673	-0.839731	48	(0.01, 0.1, 1)	0	0	entorhinal	1	0	0.277482	higher
194	laminar similarity	Celltype	Neuro-Ex	clear	0.298021	0.279116	-0.791988	62	(0.01, 0.1, 1)	0	0	entorhinal	1	0	0.277482	higher
195	laminar similarity	Receptors	NET	mis	0.298007	0.274685	-0.7733	70	(0.01, 0.1, 1)	0	0	entorhinal	1	0	0.277482	higher
196	laminar similarity	Celltype	Oligo	mis	0.297927	0.275137	-0.774931	70	(0.01, 0.1, 1)	0	0	entorhinal	1	0	0.277482	higher
197	laminar similarity	Receptors	H3	mis	0.297855	0.275208	-0.773964	68	(0.01, 0.1, 1)	0	0	entorhinal	1	0	0.277482	higher
198	laminar similarity	metabolism	cbf	mis	0.297809	0.274881	-0.773683	69	(0.01, 0.1, 1)	0	0	entorhinal	1	0	0.277482	higher
199	laminar similarity	Receptors	5HT1b	mis	0.297798	0.274983	-0.775421	69	(0.01, 0.1, 1)	0	0	entorhinal	1	0	0.277482	higher
200	laminar similarity	metabolism	cmrglc	mis	0.297782	0.274981	-0.774816	69	(0.01, 0.1, 1)	0	0	entorhinal	1	0	0.277482	higher
201	laminar similarity	AD-realted	Abeta	clear	0.297706	0.254387	-0.62327	2684	(0.7, 0.1, 0.3)	0	0	precuneus	0	0	0.141914	higher
202	laminar similarity	Microstructure	genepc1	mis	0.297574	0.2679	-0.736221	144	(0.01, 1, 0.3)	0	0	entorhinal	1	0	0.277482	higher
203	laminar similarity	Receptors	A4B2	mis	0.297277	0.275814	-0.776194	66	(0.01, 0.1, 1)	0	0	entorhinal	1	0	0.277482	higher
204	laminar similarity	Receptors	D1	syn	0.297259	0.280588	-0.785164	79	(0.01, 0.1, 1)	0	0	entorhinal	1	0	0.277482	higher
205	laminar similarity	Celltype	Astro	clear	0.296951	0.280557	-0.792	64	(0.01, 0.1, 1)	0	0	entorhinal	1	0	0.277482	higher
206	laminar similarity	Microstructure	myelinmap	mis	0.296617	0.270412	-0.734299	66	(0.01, 1, 0.7)	0	0	entorhinal	1	0	0.277482	higher
207	laminar similarity	Microstructure	myelinmap	spread	0.296432	0.261624	-0.610358	79	(0.01, 0.1, 1)	0	0	entorhinal	1	0	0.277482	higher
208	laminar similarity	Celltype	Neuro-In	clear	0.296252	0.278563	-0.786189	60	(0.01, 0.1, 1)	0	0	entorhinal	1	0	0.277482	higher
209	laminar similarity	Cortical expansion	scalingpnc	mis	0.296163	0.279116	-0.903051	62	(0.9, 2.9, 1)	0	0	entorhinal	1	0	0.277482	higher
210	laminar similarity	Receptors	5HT2a	spread	0.296088	0.250691	-0.681992	55	(0.01, 0.1, 1)	0	0	entorhinal	1	0	0.277482	higher
211	laminar similarity	Celltype	Neuro-Ex	spread	0.296036	0.231229	-0.860736	2250	(0.01, 0.9, 0.1)	0	0	entorhinal	1	0	0.277482	higher
212	laminar similarity	Microstructure	myelinmap	clear	0.295878	0.292152	-0.105675	29999	(0.9, 3, 1)	1	0	precuneus	0	1	0.141914	higher
213	laminar similarity	Microstructure	genepc1	spread	0.295765	0.260879	-0.58068	67	(0.01, 0.1, 1)	0	0	entorhinal	1	0	0.277482	higher
214	laminar similarity	Celltype	OPC	clear	0.293935	0.272474	-0.759321	315	(0.01, 0.5, 0.1)	0	0	entorhinal	1	0	0.277482	higher
215	laminar similarity	Receptors	5HT2a	mis	0.293071	0.287531	-1.05538	696	(0.9, 1.5, 0.1)	0	0	precuneus	0	0	0.141914	higher
216	laminar similarity	Receptors	5HT4	clear	0.292801	0.274512	-0.747968	66	(0.01, 0.1, 1)	0	0	entorhinal	1	0	0.277482	higher
217	laminar similarity	Receptors	5HT2a	syn	0.292636	0.294032	-0.842235	79	(0.01, 0.1, 1)	0	0	entorhinal	1	0	0.277482	higher
218	laminar similarity	Celltype	Micro	spread	0.292362	0.239607	-0.49145	153	(0.9, 3, 0.1)	0	0	entorhinal	1	0	0.277482	higher
219	laminar similarity	AD-realted	Abeta	syn	0.290174	0.147637	-0.376216	165	(0.9, 3, 0.1)	0	0	precuneus	0	0	0.141914	higher
220	laminar similarity	Receptors	D2	clear	0.2887	0.29326	-0.833479	49	(0.01, 0.1, 1)	0	0	entorhinal	1	0	0.277482	higher
221	laminar similarity	Receptors	5HTT	syn	0.288095	0.274468	-0.786048	3898	(0.9, 0.5, 0.3)	1	0	precuneus	0	0	0.141914	higher
222	laminar similarity	Cortical expansion	scalingpnc	syn	0.287972	0.301627	-0.822966	58	(0.9, 3, 0.1)	0	0	entorhinal	1	0	0.277482	higher
223	laminar similarity	Receptors	CB1	clear	0.287353	0.278989	-0.93352	369	(0.5, 0.1, 1)	0	0	entorhinal	1	0	0.277482	higher
224	laminar similarity	Receptors	D1	clear	0.2871	0.277086	-0.793133	225	(0.01, 0.5, 0.1)	0	0	entorhinal	1	0	0.277482	higher
225	laminar similarity	Receptors	NMDA	spread	0.286587	0.277182	-0.855836	60	(0.01, 0.1, 1)	0	0	entorhinal	1	0	0.277482	higher
226	laminar similarity	Receptors	5HT1a	clear	0.285305	0.299094	-0.867858	46	(0.01, 0.1, 1)	0	0	entorhinal	1	0	0.277482	higher
227	laminar similarity	Cortical expansion	scalingpnc	clear	0.28506	0.266333	-0.950603	5792	(0.7, 0.1, 1)	1	0	precuneus	0	0	0.141914	higher
228	laminar similarity	Celltype	Astro	syn	0.283831	0.183202	-0.188056	190	(0.9, 3, 0.1)	0	0	entorhinal	0	0	0.277482	higher
229	laminar similarity	Cortical expansion	devexp	clear	0.282553	0.187496	-0.319951	277	(0.1, 0.5, 1)	0	0	precuneus	0	0	0.141914	higher
230	laminar similarity	Receptors	M1	spread	0.277901	0.284881	-0.852394	42	(0.01, 0.1, 1)	0	0	entorhinal	1	0	0.277482	higher
231	laminar similarity	Receptors	5HT2a	syn	0.275451	0.28824	-1.04271	478	(0.9, 0.9, 0.1)	0	0	precuneus	0	0	0.141914	higher
232	laminar similarity	Microstructure	thickness	clear	0.27517	0.310693	-0.923225	219	(0.5, 0.1, 1)	0	0	entorhinal	1	0	0.277482	lower
233	laminar similarity	Receptors	5HTT	spread	0.273205	0.310739	-0.920056	58	(0.01, 0.1, 1)	0	0	entorhinal	1	0	0.277482	lower
234	laminar similarity	Receptors	5HT6	spread	0.272987	0.274235	-0.788195	98	(0.9, 3, 1)	0	0	entorhinal	1	0	0.277482	lower
235	laminar similarity	Celltype	Neuro-Ex	syn	0.270432	0.301812	-0.95387	140	(0.9, 0.9, 1)	0	0	entorhinal	1	0	0.277482	lower
236	laminar similarity	Receptors	DAT	clear	0.269998	0.320532	-0.943644	310	(0.7, 0.1, 0.1)	0	0	entorhinal	1	0	0.277482	lower
237	laminar similarity	Receptors	DAT	syn	0.268579	0.161728	-0.596768	202	(0.5, 1.5, 0.5)	1	0	precuneus	0	0	0.141914	higher
238	laminar similarity	Celltype	Endo	spread	0.268244	0.310643	-0.906253	46	(0.01, 0.1, 1)	0	0	entorhinal	1	0	0.277482	lower
239	laminar similarity	Celltype	Astro	mis	0.267177	0.319738	-1.01811	58	(0.9, 3, 1)	0	0	entorhinal	0	1	0.277482	lower
240	laminar similarity	Receptors	GABAa	spread	0.265649	0.302817	-0.961633	32	(0.01, 0.1, 1)	0	0	entorhinal	1	0	0.277482	lower
241	laminar similarity	Microstructure	genepc1	clear	0.265069	0.308674	-1.44903	47	(0.7, 3, 0.1)	1	0	precuneus	0	1	0.141914	higher
242	laminar similarity	metabolism	cmr02	spread	0.26469	0.30794	-0.955965	30	(0.01, 0.1, 1)	0	0	entorhinal	1	0	0.277482	lower
243	laminar similarity	Cortical expansion	scalingnih	mis	0.260044	0.180012	-0.274761	476	(0.9, 2.5, 0.1)	1	0	precuneus	0	0	0.141914	higher
244	laminar similarity	Receptors	VAChT	spread	0.257456	0.342023	-1.01796	78	(0.9, 0.1, 0.1)	0	0	entorhinal	1	0	0.277482	lower
245	laminar similarity	Receptors	H3	spread	0.257274	0.342695	-1.01796	59	(0.9, 0.1, 0.1)	0	0	entorhinal	1	0	0.277482	lower
246	laminar similarity	AD-realted	APOE	spread	0.257259	0.342842	-1.01855	59	(0.9, 0.1, 0.1)	0	0	entorhinal	1	0	0.277482	lower
247	laminar similarity	Celltype	Oligo	spread	0.257212	0.343082	-1.01841	57	(0.9, 0.1, 0.1)	0	0	entorhinal	1	0	0.277482	lower
248	laminar similarity	Receptors	NET	spread	0.257125	0.343166	-1.01921	51	(0.9, 0.1, 0.1)	0	0	entorhinal	1	0	0.277482	lower
249	laminar similarity	metabolism	cbf	spread	0.257109	0.34313	-1.019	50	(0.9, 0.1, 0.1)	0	0	entorhinal	1	0	0.277482	lower
250	laminar similarity	metabolism	cmrglc	spread	0.257017	0.343398	-1.01992	46	(0.9, 0.1, 0.1)	0	0	entorhinal	1	0	0.277482	lower
251	laminar similarity	Receptors	5HT1b	spread	0.256979	0.343489	-1.02032	45	(0.9, 0.1, 0.1)	0	0	entorhinal	1	0	0.277482	lower
252	laminar similarity	Receptors	A4B2	spread	0.256948	0.343332	-1.01965	44	(0.9, 0.1, 0.1)	0	0	entorhinal	1	0	0.277482	lower
253	laminar similarity	Receptors	mGluR5	spread	0.253901	0.325443	-1.04084	80	(0.9, 3, 1)	0	0	entorhinal	1	0	0.277482	lower
254	laminar similarity	Receptors	5HTT	mis	0.252266	0.283313	-0.918453	29999	(0.9, 0.9, 0.1)	0	0	precuneus	0	0	0.141914	higher
255	laminar similarity	Cortical expansion	scalinghcp	syn	0.248473	0.215999	-0.306549	29999	(0.9, 1.5, 0.1)	0	0	precuneus	0	1	0.141914	higher
256	laminar similarity	Cortical expansion	scaling	mis	0.238724	0.19154	-0.295061	333	(0.9, 2.9, 0.1)	1	0	precuneus	0	0	0.141914	higher
257	laminar similarity	Cortical expansion	scalinghcp	spread	0.227325	0.242617	-0.3409	2801	(0.9, 3, 0.1)	0	0	precuneus	0	0	0.141914	higher
258	laminar similarity	Celltype	OPC	syn	0.226601	0.296794	-0.810701	106	(0.9, 3, 0.1)	1	0	precuneus	0	1	0.141914	higher
259	laminar similarity	Cortical expansion	scalingnih	spread	0.226548	0.193033	-0.415072	3075	(0.9, 3, 0.1)	0	0	precuneus	0	0	0.141914	higher
260	laminar similarity	Cortical expansion	scaling	spread	0.218935	0.207336	-0.382375	3322	(0.9, 3, 0.1)	0	0	precuneus	0	0	0.141914	higher
261	laminar similarity	Celltype	OPC	mis	0.214116	0.294713	-0.939382	212	(0.9, 3, 0.1)	0	0	precuneus	0	0	0.141914	higher
262	laminar similarity	Receptors	NMDA	clear	0.212011	0.199825	-0.315297	29999	(0.7, 0.9, 1)	1	0	precuneus	0	1	0.141914	higher
263	laminar similarity	Cortical expansion	scalingnih	syn	0.196567	0.208428	-0.419144	129	(0.9, 2.9, 0.1)	0	0	precuneus	0	1	0.141914	higher
264	laminar similarity	Cortical expansion	scaling	syn	0.193809	0.20629	-0.441793	123	(0.9, 3, 0.1)	0	0	precuneus	0	1	0.141914	higher
265	laminar similarity	metabolism	cbv	syn	0.187715	0.269117	-0.360685	29999	(0.9, 3, 1)	1	0	precuneus	0	0	0.141914	higher
266	laminar similarity	Receptors	M1	spread	0.169282	0.202502	-0.5277	29999	(0.9, 1.5, 1)	0	0	precuneus	0	0	0.141914	higher
267	laminar similarity	Receptors	mGluR5	spread	0.164345	0.195017	-0.555526	29999	(0.9, 3, 1)	0	0	precuneus	0	0	0.141914	higher
268	laminar similarity	Receptors	5HT6	spread	0.158572	0.224617	-0.405785	29999	(0.9, 3, 1)	0	0	precuneus	0	0	0.141914	higher
269	laminar similarity	Cortical expansion	scalingpnc	spread	0.155131	0.217713	-0.503508	29999	(0.9, 3, 1)	0	0	precuneus	0	1	0.141914	higher
270	laminar similarity	Receptors	DAT	mis	0.150396	0.262162	-1.25493	297	(0.9, 1.5, 1)	0	0	precuneus	0	0	0.141914	higher
271	laminar similarity	Receptors	DAT	spread	0.149352	0.20036	-0.574739	1103	(0.9, 3, 0.1)	0	0	precuneus	0	1	0.141914	higher
272	laminar similarity	Celltype	Astro	spread	0.139351	0.212553	-0.62755	1320	(0.9, 3, 0.1)	0	0	precuneus	0	0	0.141914	lower
273	laminar similarity	metabolism	cbv	mis	0.137846	0.254256	-0.350394	29999	(0.9, 3, 1)	0	0	precuneus	0	0	0.141914	lower
274	laminar similarity	Cortical expansion	scalingpnc	mis	0.133387	0.214357	-0.537941	292	(0.9, 3, 0.1)	0	0	precuneus	0	0	0.141914	lower
275	laminar similarity	Receptors	5HT2a	spread	0.132858	0.234543	-0.545563	5692	(0.9, 3, 1)	0	0	precuneus	0	0	0.141914	lower
276	laminar similarity	Celltype	Neuro-In	clear	0.131268	0.237005	-0.584737	29999	(0.9, 3, 1)	1	0	precuneus	0	0	0.141914	lower
277	laminar similarity	Celltype	OPC	spread	0.127017	0.164501	-0.891276	1466	(0.9, 3, 0.1)	0	0	precuneus	0	0	0.141914	lower
278	laminar similarity	Cortical expansion	scalingpnc	syn	0.11855	0.218386	-0.619253	124	(0.9, 3, 0.1)	0	0	precuneus	0	0	0.141914	lower
279	laminar similarity	Celltype	Micro	mis	0.116427	0.284363	-0.356843	29999	(0.9, 3, 1)	1	0	precuneus	0	0	0.141914	lower
280	laminar similarity	Celltype	Neuro-Ex	syn	0.114743	0.339586	-1.41622	307	(0.9, 1, 0.1)	1	0	precuneus	0	0	0.141914	lower
281	laminar similarity	Celltype	Neuro-Ex	mis	0.114071	0.343157	-1.31638	199	(0.9, 2.5, 0.1)	0	0	precuneus	0	1	0.141914	lower
282	laminar similarity	Celltype	Micro	syn	0.113235	0.339919	-2.63834	78	(0.9, 3, 0.1)	0	0	precuneus	0	0	0.141914	lower
283	laminar similarity	Receptors	D1	mis	0.108839	0.253007	-0.416061	29999	(0.9, 3, 0.1)	1	0	precuneus	0	0	0.141914	lower
284	laminar similarity	Receptors	D1	spread	0.108261	0.203721	-0.595056	793	(0.9, 1.5, 1)	0	0	precuneus	0	1	0.141914	lower
285	laminar similarity	Celltype	Neuro-In	mis	0.101769	0.313516	-1.52823	270	(0.9, 2, 0.1)	0	0	precuneus	0	0	0.141914	lower
286	laminar similarity	Cortical expansion	evoexp	clear	0.100648	0.264405	-0.369461	29999	(0.5, 0.5, 1)	0	0	precuneus	0	0	0.141914	lower
287	laminar similarity	Receptors	5HTT	clear	0.0955894	0.250748	-0.477291	68	(0.9, 3, 0.1)	0	0	precuneus	0	1	0.141914	lower
288	laminar similarity	Celltype	Neuro-In	syn	0.0947465	0.306029	-1.38721	310	(0.9, 1, 0.1)	0	0	precuneus	0	0	0.141914	lower
289	laminar similarity	Receptors	MOR	mis	0.0795479	0.263729	-0.857017	82	(0.7, 3, 1)	0	0	precuneus	0	0	0.141914	lower
290	laminar similarity	Cortical expansion	devexp	spread	0.0768874	0.253277	-0.515574	1523	(0.01, 0.5, 1)	0	0	precuneus	0	0	0.141914	lower
291	laminar similarity	metabolism	cbf	syn	0.073818	0.258404	-0.785068	16748	(0.01, 0.5, 0.1)	0	0	precuneus	0	0	0.141914	lower
292	laminar similarity	Receptors	D1	syn	0.0621802	0.305232	-1.59198	157	(0.9, 2, 0.1)	0	0	precuneus	0	0	0.141914	lower
293	laminar similarity	metabolism	cmrglc	syn	0.0598955	0.253349	-0.8563	19008	(0.01, 0.5, 0.1)	0	0	precuneus	0	0	0.141914	lower
294	laminar similarity	Receptors	mGluR5	mis	0.0564187	0.301713	-1.63023	176	(0.9, 3, 0.3)	0	0	precuneus	0	0	0.141914	lower
295	laminar similarity	AD-realted	APOE	syn	0.0501486	0.254438	-0.920312	21270	(0.01, 0.5, 0.1)	0	0	precuneus	0	0	0.141914	lower
296	laminar similarity	metabolism	cmr02	syn	0.0490564	0.258934	-0.857862	18688	(0.01, 0.5, 0.1)	0	0	precuneus	0	0	0.141914	lower
297	laminar similarity	Celltype	Neuro-In	spread	0.0432881	0.285716	-0.535367	29999	(0.9, 3, 0.1)	0	0	precuneus	0	1	0.141914	lower
298	laminar similarity	Microstructure	genepc1	syn	0.0427661	0.254467	-0.666322	4534	(0.01, 0.5, 1)	0	0	precuneus	0	0	0.141914	lower
299	laminar similarity	Receptors	5HT1b	syn	0.0419106	0.274446	-1.01895	15324	(0.01, 0.5, 0.1)	0	0	precuneus	0	0	0.141914	lower
300	laminar similarity	Receptors	mGluR5	syn	0.0417494	0.302229	-1.49606	101	(0.9, 3, 0.1)	0	0	precuneus	0	0	0.141914	lower
301	laminar similarity	Receptors	MOR	clear	0.0400308	0.336804	-0.407889	29999	(0.7, 3, 1)	0	0	precuneus	0	0	0.141914	lower
302	laminar similarity	Receptors	NET	syn	0.0383882	0.28035	-1.03057	6665	(0.01, 0.1, 0.1)	0	0	precuneus	0	0	0.141914	lower
303	laminar similarity	Celltype	Micro	spread	0.0340923	0.229564	-0.696057	1114	(0.9, 3, 0.1)	0	0	precuneus	0	0	0.141914	lower
304	laminar similarity	metabolism	cbv	spread	0.0335366	0.235708	-0.658402	247	(0.9, 3, 0.1)	0	0	precuneus	0	1	0.141914	lower
305	laminar similarity	Celltype	Micro	clear	0.031358	0.312987	-1.47657	402	(0.9, 0.1, 1)	0	0	precuneus	0	1	0.141914	lower
306	laminar similarity	Cortical expansion	scaling	clear	0.0313563	0.413469	-1.74354	0	(0.9, 0.1, 0.1)	0	0	precuneus	0	0	0.141914	lower
307	laminar similarity	Celltype	Endo	syn	0.0313562	0.413707	-1.72912	0	(0.01, 0.1, 0.1)	0	0	precuneus	0	0	0.141914	lower
308	laminar similarity	Receptors	MOR	syn	0.0313561	0.41376	-1.72593	0	(0.7, 0.1, 1)	0	0	precuneus	0	0	0.141914	lower
309	laminar similarity	Receptors	A4B2	syn	0.0313558	0.413232	-1.75822	0	(0.01, 0.1, 0.1)	0	0	precuneus	0	0	0.141914	lower
310	laminar similarity	Receptors	GABAa	syn	0.0313552	0.414012	-1.71113	0	(0.01, 0.5, 1)	0	0	precuneus	0	0	0.141914	lower
311	laminar similarity	Celltype	Oligo	mis	0.0313551	0.414035	-1.70977	0	(0.9, 3, 1)	0	0	precuneus	0	0	0.141914	lower
312	laminar similarity	Receptors	VAChT	syn	0.0313526	0.414415	-1.68814	0	(0.01, 0.1, 1)	0	0	precuneus	0	0	0.141914	lower
313	laminar similarity	Celltype	Astro	clear	0.0313516	0.414527	-1.68193	0	(0.9, 0.1, 0.1)	0	0	precuneus	0	0	0.141914	lower
314	laminar similarity	Receptors	DAT	clear	0.0313508	0.414606	-1.67758	0	(0.9, 0.1, 0.1)	0	0	precuneus	0	0	0.141914	lower
315	laminar similarity	Cortical expansion	scalinghcp	clear	0.0313486	0.412439	-1.81035	0	(0.9, 0.1, 0.1)	0	0	precuneus	0	0	0.141914	lower
316	laminar similarity	Receptors	D2	clear	0.0313481	0.414855	-1.66409	0	(0.9, 0.1, 0.1)	0	0	precuneus	0	0	0.141914	lower
317	laminar similarity	Microstructure	thickness	clear	0.0313469	0.414956	-1.65868	0	(0.9, 0.1, 0.1)	0	0	precuneus	0	0	0.141914	lower
318	laminar similarity	Receptors	H3	syn	0.0313387	0.415516	-1.62961	0	(0.01, 0.1, 1)	0	0	precuneus	0	0	0.141914	lower
319	laminar similarity	metabolism	cbf	mis	0.0313373	0.415603	-1.62524	0	(0.9, 3, 0.1)	0	0	precuneus	0	0	0.141914	lower
320	laminar similarity	Receptors	NMDA	mis	0.031337	0.415618	-1.6245	0	(0.9, 3, 0.1)	0	0	precuneus	0	0	0.141914	lower
321	laminar similarity	Receptors	NET	mis	0.031336	0.415674	-1.62166	0	(0.9, 3, 0.1)	0	0	precuneus	0	0	0.141914	lower
322	laminar similarity	Microstructure	myelinmap	mis	0.0313348	0.415748	-1.61801	0	(0.9, 3, 0.1)	0	0	precuneus	0	0	0.141914	lower
323	laminar similarity	Receptors	5HT1b	mis	0.0313339	0.415795	-1.61565	0	(0.9, 3, 0.1)	0	0	precuneus	0	0	0.141914	lower
324	laminar similarity	metabolism	cbv	clear	0.0313337	0.415806	-1.61511	0	(0.3, 3, 1)	0	0	precuneus	0	0	0.141914	lower
325	laminar similarity	Receptors	H3	mis	0.0313336	0.415811	-1.61489	0	(0.9, 3, 0.1)	0	0	precuneus	0	0	0.141914	lower
326	laminar similarity	metabolism	cmr02	mis	0.0313325	0.415868	-1.61207	0	(0.9, 3, 0.1)	0	0	precuneus	0	0	0.141914	lower
327	laminar similarity	metabolism	cmrglc	mis	0.031332	0.415845	-1.61323	0	(0.9, 3, 0.1)	0	0	precuneus	0	0	0.141914	lower
328	laminar similarity	Receptors	GABAa	spread	0.0313308	0.415781	-1.6164	0	(0.9, 3, 0.1)	0	0	precuneus	0	0	0.141914	lower
329	laminar similarity	AD-realted	APOE	spread	0.0313308	0.415781	-1.6164	0	(0.9, 3, 0.1)	0	0	precuneus	0	0	0.141914	lower
330	laminar similarity	AD-realted	Cluster2	clear	0.0313308	0.415781	-1.6164	0	(0.9, 3, 0.1)	0	0	precuneus	0	0	0.141914	lower
331	laminar similarity	Receptors	5HT1b	spread	0.0313308	0.415781	-1.6164	0	(0.9, 3, 0.1)	0	0	precuneus	0	0	0.141914	lower
332	laminar similarity	AD-realted	Cluster3	spread	0.0313308	0.415781	-1.6164	0	(0.9, 3, 0.1)	0	0	precuneus	0	0	0.141914	lower
333	laminar similarity	AD-realted	Cluster3	mis	0.0313308	0.415781	-1.6164	0	(0.9, 3, 0.1)	0	0	precuneus	0	0	0.141914	lower
334	laminar similarity	AD-realted	Cluster7	spread	0.0313308	0.415781	-1.6164	0	(0.9, 3, 0.1)	0	0	precuneus	0	0	0.141914	lower
335	laminar similarity	AD-realted	Cluster3	clear	0.0313308	0.415781	-1.6164	0	(0.9, 3, 0.1)	0	0	precuneus	0	0	0.141914	lower
336	laminar similarity	AD-realted	Cluster2	syn	0.0313308	0.415781	-1.6164	0	(0.9, 3, 0.1)	1	0	precuneus	0	1	0.141914	lower
337	laminar similarity	Receptors	5HTT	spread	0.0313308	0.415781	-1.6164	0	(0.9, 3, 0.1)	0	0	precuneus	0	0	0.141914	lower
338	laminar similarity	AD-realted	Cluster2	spread	0.0313308	0.415781	-1.6164	0	(0.9, 3, 0.1)	0	0	precuneus	0	0	0.141914	lower
339	laminar similarity	AD-realted	Cluster2	mis	0.0313308	0.415781	-1.6164	0	(0.9, 3, 0.1)	0	0	precuneus	0	0	0.141914	lower
340	laminar similarity	Receptors	A4B2	spread	0.0313308	0.415781	-1.6164	0	(0.9, 3, 0.1)	0	0	precuneus	0	0	0.141914	lower
341	laminar similarity	AD-realted	Cluster1	syn	0.0313308	0.415781	-1.6164	0	(0.9, 3, 0.1)	1	0	precuneus	0	1	0.141914	lower
342	laminar similarity	metabolism	cmr02	spread	0.0313308	0.415781	-1.6164	0	(0.9, 3, 0.1)	0	0	precuneus	0	0	0.141914	lower
343	laminar similarity	AD-realted	Cluster1	spread	0.0313308	0.415781	-1.6164	0	(0.9, 3, 0.1)	0	0	precuneus	0	0	0.141914	lower
344	laminar similarity	AD-realted	Cluster1	mis	0.0313308	0.415781	-1.6164	0	(0.9, 3, 0.1)	0	0	precuneus	0	0	0.141914	lower
345	laminar similarity	AD-realted	Cluster3	syn	0.0313308	0.415781	-1.6164	0	(0.9, 3, 0.1)	1	0	precuneus	0	1	0.141914	lower
346	laminar similarity	AD-realted	Cluster1	clear	0.0313308	0.415781	-1.6164	0	(0.9, 3, 0.1)	0	0	precuneus	0	0	0.141914	lower
347	laminar similarity	metabolism	cmrglc	spread	0.0313308	0.415781	-1.6164	0	(0.9, 3, 0.1)	0	0	precuneus	0	0	0.141914	lower
348	laminar similarity	Receptors	H3	spread	0.0313308	0.415781	-1.6164	0	(0.9, 3, 0.1)	0	0	precuneus	0	0	0.141914	lower
349	laminar similarity	Receptors	NET	spread	0.0313308	0.415781	-1.6164	0	(0.9, 3, 0.1)	0	0	precuneus	0	0	0.141914	lower
350	laminar similarity	Receptors	NMDA	spread	0.0313308	0.415781	-1.6164	0	(0.9, 3, 0.1)	0	0	precuneus	0	0	0.141914	lower
351	laminar similarity	Receptors	VAChT	spread	0.0313308	0.415781	-1.6164	0	(0.9, 3, 0.1)	0	0	precuneus	0	0	0.141914	lower
352	laminar similarity	metabolism	cbf	spread	0.0313308	0.415781	-1.6164	0	(0.9, 3, 0.1)	0	0	precuneus	0	0	0.141914	lower
353	laminar similarity	AD-realted	Cluster7	syn	0.0313308	0.415781	-1.6164	0	(0.9, 3, 0.1)	1	0	precuneus	0	1	0.141914	lower
354	laminar similarity				0.0313308	0.415781	-1.6164	0	(0.9, 3, 0.1)	0	1	precuneus	0	0	0.141914	lower
355	laminar similarity	AD-realted	Cluster4	clear	0.0313308	0.415781	-1.6164	0	(0.9, 3, 0.1)	0	0	precuneus	0	0	0.141914	lower
356	laminar similarity	AD-realted	Cluster5	mis	0.0313308	0.415781	-1.6164	0	(0.9, 3, 0.1)	0	0	precuneus	0	0	0.141914	lower
357	laminar similarity	AD-realted	Cluster7	mis	0.0313308	0.415781	-1.6164	0	(0.9, 3, 0.1)	0	0	precuneus	0	0	0.141914	lower
358	laminar similarity	AD-realted	Cluster7	clear	0.0313308	0.415781	-1.6164	0	(0.9, 3, 0.1)	0	0	precuneus	0	0	0.141914	lower
359	laminar similarity	Celltype	Endo	spread	0.0313308	0.415781	-1.6164	0	(0.9, 3, 0.1)	0	0	precuneus	0	0	0.141914	lower
360	laminar similarity	AD-realted	Cluster6	syn	0.0313308	0.415781	-1.6164	0	(0.9, 3, 0.1)	1	0	precuneus	0	1	0.141914	lower
361	laminar similarity	AD-realted	Cluster6	spread	0.0313308	0.415781	-1.6164	0	(0.9, 3, 0.1)	0	0	precuneus	0	0	0.141914	lower
362	laminar similarity	Celltype	Neuro-Ex	spread	0.0313308	0.415781	-1.6164	0	(0.9, 3, 0.1)	0	0	precuneus	0	0	0.141914	lower
363	laminar similarity	AD-realted	Cluster6	mis	0.0313308	0.415781	-1.6164	0	(0.9, 3, 0.1)	0	0	precuneus	0	0	0.141914	lower
364	laminar similarity	AD-realted	Cluster6	clear	0.0313308	0.415781	-1.6164	0	(0.9, 3, 0.1)	0	0	precuneus	0	0	0.141914	lower
365	laminar similarity	Celltype	Oligo	spread	0.0313308	0.415781	-1.6164	0	(0.9, 3, 0.1)	0	0	precuneus	0	0	0.141914	lower
366	laminar similarity	AD-realted	Cluster5	spread	0.0313308	0.415781	-1.6164	0	(0.9, 3, 0.1)	0	0	precuneus	0	0	0.141914	lower
367	laminar similarity	AD-realted	Cluster5	syn	0.0313308	0.415781	-1.6164	0	(0.9, 3, 0.1)	1	0	precuneus	0	1	0.141914	lower
368	laminar similarity	AD-realted	Cluster4	syn	0.0313308	0.415781	-1.6164	0	(0.9, 3, 0.1)	1	0	precuneus	0	1	0.141914	lower
369	laminar similarity	Microstructure	genepc1	spread	0.0313308	0.415781	-1.6164	0	(0.9, 3, 0.1)	0	0	precuneus	0	0	0.141914	lower
370	laminar similarity	AD-realted	Cluster4	mis	0.0313308	0.415781	-1.6164	0	(0.9, 3, 0.1)	0	0	precuneus	0	0	0.141914	lower
371	laminar similarity	AD-realted	Cluster4	spread	0.0313308	0.415781	-1.6164	0	(0.9, 3, 0.1)	0	0	precuneus	0	0	0.141914	lower
372	laminar similarity	AD-realted	Cluster5	clear	0.0313308	0.415781	-1.6164	0	(0.9, 3, 0.1)	0	0	precuneus	0	0	0.141914	lower
373	laminar similarity	Microstructure	myelinmap	spread	0.0313308	0.415781	-1.6164	0	(0.9, 3, 0.1)	0	0	precuneus	0	0	0.141914	lower
374	laminar similarity	Receptors	5HT6	mis	0.0313307	0.415775	-1.61671	0	(0.9, 3, 0.1)	0	0	precuneus	0	0	0.141914	lower
375	laminar similarity	AD-realted	APOE	mis	0.0313304	0.415762	-1.61734	0	(0.9, 0.1, 0.1)	0	0	precuneus	0	0	0.141914	lower
376	laminar similarity	Microstructure	genepc1	mis	0.0313304	0.415761	-1.61738	0	(0.9, 0.1, 0.1)	0	0	precuneus	0	0	0.141914	lower
377	laminar similarity	Receptors	M1	mis	0.0313304	0.41576	-1.61742	0	(0.9, 0.1, 0.1)	0	0	precuneus	0	0	0.141914	lower
378	laminar similarity	Receptors	VAChT	mis	0.0313304	0.415758	-1.61752	0	(0.9, 0.1, 0.1)	0	0	precuneus	0	0	0.141914	lower
379	laminar similarity	Receptors	A4B2	mis	0.0313301	0.415746	-1.61812	0	(0.9, 0.1, 0.1)	0	0	precuneus	0	0	0.141914	lower
380	laminar similarity	Celltype	Endo	mis	0.0313298	0.415732	-1.61886	0	(0.9, 0.1, 0.1)	0	0	precuneus	0	0	0.141914	lower
381	laminar similarity	Receptors	GABAa	mis	0.0313298	0.415727	-1.61908	0	(0.9, 0.1, 0.1)	0	0	precuneus	0	0	0.141914	lower
382	laminar similarity	Receptors	5HT4	clear	0.0313283	0.415653	-1.62282	0	(0.9, 0.1, 0.1)	0	0	precuneus	0	0	0.141914	lower
383	laminar similarity	Receptors	5HT6	syn	0.031325	0.415498	-1.63069	0	(0.01, 0.1, 0.1)	0	0	precuneus	0	0	0.141914	lower
384	laminar similarity	Cortical expansion	scalingnih	clear	0.0313249	0.415496	-1.63079	0	(0.9, 3, 0.1)	0	0	precuneus	0	0	0.141914	lower
385	laminar similarity	Receptors	M1	syn	0.0313076	0.414817	-1.66656	0	(0.01, 0.1, 0.1)	0	0	precuneus	0	0	0.141914	lower
386	laminar similarity	Receptors	D1	clear	0.0312912	0.414307	-1.6949	0	(0.01, 3, 1)	0	0	precuneus	0	0	0.141914	lower
387	laminar similarity	Receptors	5HT1a	clear	0.0312863	0.414171	-1.70268	0	(0.01, 3, 1)	0	0	precuneus	0	0	0.141914	lower
388	laminar similarity	Receptors	CB1	clear	0.0312855	0.41415	-1.70391	0	(0.01, 0.9, 1)	0	0	precuneus	0	0	0.141914	lower
389	laminar similarity	Celltype	OPC	clear	0.0312843	0.410558	-1.95644	0	(0.9, 0.1, 0.1)	0	0	precuneus	0	0	0.141914	lower
390	laminar similarity	Microstructure	myelinmap	syn	0.0312717	0.413806	-1.72413	0	(0.01, 0.5, 1)	0	0	precuneus	0	0	0.141914	lower
391	laminar similarity	AD-realted	MAPT	clear	0.0312697	0.413759	-1.727	0	(0.01, 3, 1)	0	0	precuneus	0	0	0.141914	lower
392	laminar similarity	Receptors	NMDA	syn	0.0312532	0.4134	-1.74901	0	(0.01, 0.1, 1)	0	0	precuneus	0	0	0.141914	lower
393	laminar similarity	Celltype	Neuro-Ex	clear	0.0312486	0.413307	-1.75483	0	(0.01, 3, 1)	0	0	precuneus	0	0	0.141914	lower
394	laminar similarity	Celltype	Oligo	syn	0.0309433	0.410028	-2.01031	0	(0.01, 0.5, 0.1)	0	0	precuneus	0	0	0.141914	lower
1	metabolic covariance	AD-realted	MAPT	spread	0.811984	0.0649144	0.616343	305	(0.01, 1.5, 1)	1	0	entorhinal	1	1	0.467522	higher
2	metabolic covariance	AD-realted	MAPT	spread	0.805243	0.063159	0.594644	303	(0.01, 1.5, 1)	1	0	precuneus	0	1	0.366131	higher
3	metabolic covariance	Receptors	D2	mis	0.786388	0.128793	0.590226	297	(0.9, 1.9, 0.3)	1	0	entorhinal	1	1	0.467522	higher
4	metabolic covariance	Receptors	5HT4	spread	0.783501	0.112454	0.533251	599	(0.9, 0.9, 1)	1	0	entorhinal	1	1	0.467522	higher
5	metabolic covariance	Receptors	D2	syn	0.771333	0.131118	0.553236	275	(0.7, 1.5, 0.1)	0	0	entorhinal	1	0	0.467522	higher
6	metabolic covariance	AD-realted	MAPT	mis	0.770715	0.108949	0.523127	479	(0.5, 2.5, 0.1)	0	0	entorhinal	1	0	0.467522	higher
7	metabolic covariance	Microstructure	thickness	spread	0.770697	0.116283	0.53894	219	(0.7, 1.9, 1)	1	0	entorhinal	1	1	0.467522	higher
8	metabolic covariance	Microstructure	thickness	mis	0.770069	0.128056	0.541898	499	(0.5, 2.5, 0.1)	0	0	entorhinal	1	0	0.467522	higher
9	metabolic covariance	Receptors	5HT1a	spread	0.765621	0.116205	0.497585	841	(0.9, 1, 1)	1	0	entorhinal	1	1	0.467522	higher
10	metabolic covariance	Microstructure	thickness	mis	0.764481	0.114458	0.527977	1160	(0.5, 1.5, 0.3)	1	0	precuneus	0	0	0.366131	higher
11	metabolic covariance	AD-realted	MAPT	mis	0.763597	0.106923	0.497787	519	(0.3, 3, 0.1)	0	0	precuneus	0	0	0.366131	higher
12	metabolic covariance	Receptors	MOR	spread	0.760477	0.134598	0.455923	132	(0.5, 3, 0.7)	1	0	entorhinal	1	1	0.467522	higher
13	metabolic covariance	Receptors	D2	mis	0.759215	0.125472	0.519767	29999	(0.9, 1, 1)	1	0	precuneus	0	1	0.366131	higher
14	metabolic covariance	AD-realted	Abeta	spread	0.758196	0.116508	0.456793	558	(0.9, 0.9, 1)	1	0	entorhinal	1	1	0.467522	higher
15	metabolic covariance	Receptors	5HT1a	spread	0.757848	0.122107	0.417952	648	(0.7, 1, 0.3)	1	0	precuneus	0	1	0.366131	higher
16	metabolic covariance	AD-realted	MAPT	syn	0.756319	0.1182	0.512685	256	(0.3, 2.5, 0.1)	0	0	entorhinal	1	0	0.467522	higher
17	metabolic covariance	Receptors	D2	spread	0.754909	0.118755	0.451037	1385	(0.01, 1.5, 0.1)	0	0	precuneus	1	0	0.366131	higher
18	metabolic covariance	Receptors	CB1	spread	0.754294	0.142056	0.470854	177	(0.7, 2, 1)	1	0	entorhinal	1	1	0.467522	higher
19	metabolic covariance	Cortical expansion	scaling	spread	0.753516	0.109322	0.504622	152	(0.01, 1.5, 1)	1	0	entorhinal	1	1	0.467522	higher
20	metabolic covariance	Microstructure	thickness	syn	0.752942	0.133688	0.492283	319	(0.5, 2, 0.1)	0	0	precuneus	1	0	0.366131	higher
21	metabolic covariance	Receptors	D2	spread	0.752361	0.136136	0.47362	536	(0.9, 1, 0.7)	0	0	entorhinal	0	0	0.467522	higher
22	metabolic covariance	Cortical expansion	evoexp	spread	0.750648	0.130117	0.474843	148	(0.7, 2.5, 1)	1	0	entorhinal	1	1	0.467522	higher
23	metabolic covariance	Cortical expansion	scalinghcp	syn	0.750223	0.119389	0.432607	222	(0.9, 1.5, 0.5)	1	0	entorhinal	1	1	0.467522	higher
24	metabolic covariance	Cortical expansion	scalinghcp	mis	0.745011	0.14255	0.403874	181	(0.9, 3, 1)	0	0	entorhinal	1	0	0.467522	higher
25	metabolic covariance	Cortical expansion	scaling	syn	0.744721	0.122305	0.439923	121	(0.9, 2.5, 0.7)	0	0	entorhinal	1	0	0.467522	higher
26	metabolic covariance	Cortical expansion	scalinghcp	spread	0.743415	0.104858	0.451152	168	(0.01, 1.5, 1)	0	0	entorhinal	1	0	0.467522	higher
27	metabolic covariance	metabolism	cbf	clear	0.742194	0.115839	0.473113	212	(0.01, 1.5, 0.3)	1	0	precuneus	1	1	0.366131	higher
28	metabolic covariance	Microstructure	thickness	spread	0.74008	0.118595	0.332812	169	(0.3, 1.5, 1)	0	0	precuneus	0	1	0.366131	higher
29	metabolic covariance	Microstructure	thickness	syn	0.73914	0.142324	0.415819	293	(0.1, 3, 0.1)	0	0	entorhinal	0	0	0.467522	higher
[truncated: 1,153 more rows]

## Sheet: Subtype2
	Connectivity	Factor type	Factor	Rate	R	MSE	EV	Time	Hyperparam	Best rate	Baseline model	epicenter	Selected_epicenter	Final_selected	Null model (95%CI)	> Null 95%CI
1	structural connectivity	AD-realted	MAPT	mis	0.679672	0.104747	0.436256	29999	(0.7, 1.5, 0.7)	1	0	precuneus	1	1	0.490196	higher
2	structural connectivity	Receptors	5HT4	spread	0.657003	0.101334	0.347936	29999	(0.9, 3, 1)	1	0	entorhinal	1	1	0.41129	higher
3	structural connectivity	Receptors	5HT4	spread	0.656148	0.0998904	0.344536	29999	(0.9, 3, 1)	1	0	precuneus	0	1	0.490196	higher
4	structural connectivity	AD-realted	MAPT	mis	0.651826	0.129163	0.403608	10920	(0.7, 2, 1)	1	0	entorhinal	0	1	0.41129	higher
5	structural connectivity	AD-realted	MAPT	syn	0.640524	0.143026	0.348729	1145	(0.3, 2.5, 0.3)	0	0	entorhinal	1	0	0.41129	higher
6	structural connectivity	AD-realted	Abeta	spread	0.627038	0.116904	0.336667	26045	(0.9, 3, 1)	1	0	precuneus	1	1	0.490196	higher
7	structural connectivity	AD-realted	MAPT	spread	0.616256	0.24225	0.264036	29999	(0.7, 2, 1)	0	0	precuneus	1	0	0.490196	higher
8	structural connectivity	Cortical expansion	evoexp	spread	0.612411	0.0997584	0.211636	29999	(0.9, 3, 1)	1	0	precuneus	1	1	0.490196	higher
9	structural connectivity	AD-realted	MAPT	spread	0.60099	0.138288	0.263896	29999	(0.9, 3, 0.1)	0	0	entorhinal	0	0	0.41129	higher
10	structural connectivity	Cortical expansion	scaling	syn	0.595579	0.186193	0.326955	1334	(0.9, 1, 0.1)	1	0	precuneus	1	1	0.490196	higher
11	structural connectivity	Cortical expansion	scaling	syn	0.595187	0.18141	0.303439	206	(0.9, 3, 0.1)	1	0	entorhinal	0	1	0.41129	higher
12	structural connectivity	Cortical expansion	scaling	mis	0.593426	0.190278	0.306264	515	(0.9, 3, 0.1)	0	0	entorhinal	1	0	0.41129	higher
13	structural connectivity	AD-realted	MAPT	syn	0.590249	0.150419	0.305512	2799	(0.3, 2.9, 0.1)	0	0	precuneus	0	0	0.490196	higher
14	structural connectivity	Cortical expansion	scaling	mis	0.588932	0.190581	0.313592	1281	(0.9, 2, 0.1)	0	0	precuneus	0	0	0.490196	higher
15	structural connectivity	Cortical expansion	scalinghcp	syn	0.585688	0.148596	0.300622	2829	(0.7, 1.9, 0.1)	1	0	precuneus	1	1	0.490196	higher
16	structural connectivity	Cortical expansion	scalinghcp	syn	0.578193	0.145733	0.278312	189	(0.9, 3, 0.7)	1	0	entorhinal	0	1	0.41129	higher
17	structural connectivity	Cortical expansion	scalinghcp	mis	0.573642	0.174482	0.301173	1146	(0.9, 2.5, 0.1)	0	0	precuneus	1	0	0.490196	higher
18	structural connectivity	Cortical expansion	scalinghcp	mis	0.565867	0.172428	0.2763	10227	(0.9, 1.9, 0.1)	0	0	entorhinal	0	0	0.41129	higher
19	structural connectivity	Cortical expansion	devexp	spread	0.559577	0.119789	-0.0801807	4564	(0.9, 3, 0.1)	1	0	entorhinal	1	1	0.41129	higher
20	structural connectivity	Cortical expansion	scalingnih	mis	0.54768	0.225195	0.147142	438	(0.9, 3, 0.1)	1	0	entorhinal	1	1	0.41129	higher
21	structural connectivity	Receptors	MOR	spread	0.545409	0.118007	-0.0516124	29999	(0.9, 3, 1)	1	0	precuneus	1	1	0.490196	higher
22	structural connectivity	Receptors	5HT4	syn	0.532602	0.270635	-0.0217989	533	(0.9, 1, 0.7)	0	0	precuneus	1	0	0.490196	higher
23	structural connectivity	AD-realted	Abeta	spread	0.531807	0.173164	-0.103907	29999	(0.01, 0.1, 1)	1	0	entorhinal	0	1	0.41129	higher
24	structural connectivity	Cortical expansion	scalingnih	mis	0.524685	0.224096	0.175816	1076	(0.7, 2.9, 0.1)	1	0	precuneus	0	1	0.490196	higher
25	structural connectivity	Cortical expansion	scalingnih	syn	0.521229	0.203919	0.165767	181	(0.9, 2.9, 0.3)	0	0	entorhinal	1	0	0.41129	higher
26	structural connectivity	Cortical expansion	scalingpnc	syn	0.518372	0.185393	0.14126	177	(0.9, 3, 0.3)	1	0	entorhinal	1	1	0.41129	higher
27	structural connectivity	Cortical expansion	devexp	spread	0.517948	0.161822	0.160428	29999	(0.9, 3, 1)	1	0	precuneus	0	1	0.490196	higher
28	structural connectivity	Cortical expansion	scalingnih	syn	0.516511	0.197722	0.0818562	3205	(0.5, 2, 0.1)	0	0	precuneus	0	0	0.490196	higher
29	structural connectivity	Receptors	5HT4	mis	0.515676	0.285561	-0.146267	526	(0.7, 2.5, 0.5)	0	0	precuneus	1	0	0.490196	higher
30	structural connectivity	Celltype	Neuro-In	mis	0.499209	0.362289	-0.687563	5880	(0.7, 1.9, 0.1)	1	0	precuneus	1	1	0.490196	higher
31	structural connectivity	Cortical expansion	scalinghcp	spread	0.495003	0.141125	0.0579373	16251	(0.01, 1.5, 1)	0	0	precuneus	1	0	0.490196	higher
32	structural connectivity	Cortical expansion	scalingpnc	mis	0.494158	0.189384	0.120871	1612	(0.7, 3, 0.1)	1	0	precuneus	1	0	0.490196	higher
33	structural connectivity	Cortical expansion	evoexp	mis	0.492201	0.290682	-0.0662957	178	(0.9, 3, 0.1)	0	0	precuneus	1	0	0.490196	higher
34	structural connectivity	Cortical expansion	evoexp	syn	0.4902	0.289897	-0.0603382	151	(0.9, 1.9, 0.1)	0	0	precuneus	1	0	0.490196	higher
35	structural connectivity	Celltype	Neuro-In	syn	0.48217	0.38317	-0.738451	669	(0.9, 0.9, 0.1)	0	0	precuneus	1	0	0.490196	lower
36	structural connectivity	AD-realted	Abeta	syn	0.480698	0.232948	-0.0559008	181	(0.9, 3, 0.1)	0	0	entorhinal	1	0	0.41129	higher
37	structural connectivity	Cortical expansion	scalingpnc	syn	0.478673	0.211611	-0.064024	308	(0.9, 2, 0.1)	0	0	precuneus	0	1	0.490196	lower
38	structural connectivity	Receptors	5HTT	clear	0.478275	0.182923	0.116852	154	(0.01, 3, 1)	1	0	precuneus	1	1	0.490196	lower
39	structural connectivity	Cortical expansion	evoexp	spread	0.475861	0.162915	0.0129881	29999	(0.9, 1.5, 0.1)	1	0	entorhinal	0	1	0.41129	higher
40	structural connectivity	Cortical expansion	scalinghcp	spread	0.474972	0.136348	-0.0492434	8013	(0.9, 3, 0.1)	0	0	entorhinal	0	0	0.41129	higher
41	structural connectivity	Cortical expansion	scaling	spread	0.47316	0.168745	0.0904877	19486	(0.01, 0.9, 1)	0	0	entorhinal	1	0	0.41129	higher
42	structural connectivity	Receptors	5HT2a	spread	0.467234	0.171525	0.014129	26146	(0.9, 3, 1)	1	0	precuneus	1	1	0.490196	lower
43	structural connectivity	Receptors	5HT1a	spread	0.466453	0.186127	-0.112385	29999	(0.7, 3, 1)	1	0	precuneus	1	1	0.490196	lower
44	structural connectivity	Receptors	5HT1a	spread	0.465688	0.185803	-0.115957	29999	(0.7, 3, 1)	1	0	entorhinal	0	1	0.41129	higher
45	structural connectivity	Celltype	Endo	syn	0.463676	0.213192	-0.119288	29999	(0.1, 2.9, 0.7)	1	0	precuneus	1	1	0.490196	lower
46	structural connectivity	AD-realted	Abeta	syn	0.451978	0.197709	0.0511453	224	(0.9, 3, 1)	0	0	precuneus	0	0	0.490196	lower
47	structural connectivity	Microstructure	thickness	spread	0.441449	0.161168	-0.102403	1004	(0.7, 3, 1)	1	0	precuneus	1	1	0.490196	lower
48	structural connectivity	AD-realted	Abeta	mis	0.438916	0.166924	-0.0245297	345	(0.9, 3, 1)	0	0	precuneus	1	0	0.490196	lower
49	structural connectivity	metabolism	cbf	syn	0.433773	0.307678	-0.636967	29999	(0.01, 3, 1)	1	0	precuneus	1	1	0.490196	lower
50	structural connectivity	metabolism	cbf	syn	0.433561	0.308289	-0.636764	29999	(0.01, 3, 1)	1	0	entorhinal	0	1	0.41129	higher
51	structural connectivity	Celltype	OPC	syn	0.432609	0.39024	-0.453166	90	(0.9, 2.5, 0.1)	1	0	precuneus	1	1	0.490196	lower
52	structural connectivity	Celltype	OPC	mis	0.431576	0.387261	-0.530863	94	(0.9, 3, 0.7)	0	0	precuneus	1	0	0.490196	lower
53	structural connectivity	Celltype	OPC	spread	0.429985	0.14007	-0.205156	1014	(0.5, 3, 1)	0	0	precuneus	1	0	0.490196	lower
54	structural connectivity	Receptors	5HTT	clear	0.429231	0.200512	0.0513726	206	(0.9, 3, 0.1)	1	0	entorhinal	0	1	0.41129	higher
55	structural connectivity	Celltype	Neuro-Ex	syn	0.427399	0.384993	-0.93123	549	(0.5, 1.9, 0.1)	1	0	precuneus	1	1	0.490196	lower
56	structural connectivity	Receptors	5HT2a	syn	0.426439	0.308207	-0.368919	625	(0.5, 2, 0.1)	0	0	precuneus	1	0	0.490196	lower
57	structural connectivity	Celltype	Astro	syn	0.423231	0.324713	-0.234036	141	(0.9, 1.5, 0.7)	1	0	precuneus	1	1	0.490196	lower
58	structural connectivity	Cortical expansion	scaling	spread	0.423082	0.176938	-0.0897013	18261	(0.7, 3, 0.1)	0	0	precuneus	0	0	0.490196	lower
59	structural connectivity	Celltype	Astro	mis	0.42293	0.322013	-0.195522	134	(0.9, 2.9, 0.3)	0	0	precuneus	1	0	0.490196	lower
60	structural connectivity	Celltype	Neuro-Ex	mis	0.42188	0.391293	-0.870267	580	(0.9, 1.5, 0.1)	0	0	precuneus	1	0	0.490196	lower
61	structural connectivity	Receptors	mGluR5	spread	0.421748	0.153972	-0.128784	29999	(0.9, 3, 1)	1	0	entorhinal	1	1	0.41129	higher
62	structural connectivity	Cortical expansion	scalingpnc	spread	0.42117	0.173711	-0.0824197	4960	(0.9, 3, 0.1)	0	0	entorhinal	1	0	0.41129	higher
63	structural connectivity	Cortical expansion	scalingpnc	spread	0.420033	0.161468	-0.115506	1153	(0.7, 3, 1)	0	0	precuneus	0	0	0.490196	lower
64	structural connectivity	Receptors	5HT2a	mis	0.41993	0.335522	-0.443656	731	(0.7, 2.5, 0.1)	0	0	precuneus	1	0	0.490196	lower
65	structural connectivity	Receptors	mGluR5	spread	0.419025	0.154894	-0.130569	29999	(0.9, 3, 1)	1	0	precuneus	0	1	0.490196	lower
66	structural connectivity	Celltype	Neuro-In	mis	0.418709	0.368176	-1.29949	4281	(0.9, 1, 1)	1	0	entorhinal	0	1	0.41129	higher
67	structural connectivity	AD-realted	Abeta	mis	0.416595	0.266221	0.0375855	29999	(0.9, 3, 0.5)	0	0	entorhinal	0	0	0.41129	higher
68	structural connectivity	Receptors	NET	clear	0.414937	0.382266	-0.913932	47	(0.01, 2.5, 1)	1	0	precuneus	1	1	0.490196	lower
69	structural connectivity	metabolism	cbf	clear	0.413384	0.201746	-0.115268	29999	(0.01, 2, 1)	0	0	entorhinal	1	0	0.41129	higher
70	structural connectivity	metabolism	cbf	clear	0.412925	0.200737	-0.118695	29999	(0.01, 2, 1)	0	0	precuneus	0	0	0.490196	lower
71	structural connectivity	Receptors	5HT4	syn	0.412306	0.281574	-0.0892314	880	(0.9, 1, 0.1)	0	0	entorhinal	0	0	0.41129	higher
72	structural connectivity	Receptors	5HTT	syn	0.408594	0.184852	-0.525128	29999	(0.3, 3, 1)	0	0	precuneus	1	0	0.490196	lower
73	structural connectivity	Receptors	NET	syn	0.401415	0.248293	-0.591388	16541	(0.01, 3, 1)	0	0	precuneus	1	0	0.490196	lower
74	structural connectivity	Receptors	NET	syn	0.401263	0.249306	-0.587215	16768	(0.01, 3, 1)	1	0	entorhinal	0	0	0.41129	lower
75	structural connectivity	Receptors	5HT4	mis	0.395445	0.204051	-0.0708983	434	(0.9, 2.9, 0.7)	0	0	entorhinal	0	0	0.41129	lower
76	structural connectivity	Microstructure	thickness	spread	0.39538	0.157707	-0.280142	29999	(0.9, 1.5, 0.3)	1	0	entorhinal	0	1	0.41129	lower
77	structural connectivity	Celltype	Endo	clear	0.394572	0.212095	-0.1188	317	(0.9, 0.9, 0.1)	0	0	precuneus	1	0	0.490196	lower
78	structural connectivity	Receptors	5HT1b	syn	0.391301	0.263392	-0.611407	29999	(0.01, 3, 1)	1	0	entorhinal	1	1	0.41129	lower
79	structural connectivity	Receptors	5HT1b	syn	0.391129	0.262804	-0.612317	29999	(0.01, 3, 1)	1	0	precuneus	0	1	0.490196	lower
80	structural connectivity	Receptors	H3	syn	0.390796	0.249067	-0.758574	29999	(0.01, 3, 1)	1	0	precuneus	1	1	0.490196	lower
81	structural connectivity	Receptors	H3	syn	0.390743	0.249423	-0.75764	29999	(0.01, 3, 1)	1	0	entorhinal	0	1	0.41129	lower
82	structural connectivity	Cortical expansion	devexp	mis	0.389792	0.361233	-0.874713	1827	(0.7, 2, 0.1)	0	0	precuneus	1	0	0.490196	lower
83	structural connectivity	Celltype	OPC	spread	0.383108	0.163459	-0.201622	1247	(0.9, 3, 1)	1	0	entorhinal	0	0	0.41129	lower
84	structural connectivity	Cortical expansion	evoexp	mis	0.382773	0.337605	-0.449557	1049	(0.9, 1.5, 0.5)	0	0	entorhinal	0	0	0.41129	lower
85	structural connectivity	Celltype	Endo	clear	0.382671	0.224041	-0.149435	29999	(0.9, 0.1, 0.1)	1	0	entorhinal	0	0	0.41129	lower
86	structural connectivity	Receptors	MOR	spread	0.38173	0.147311	-0.408287	29999	(0.9, 1.5, 0.1)	1	0	entorhinal	0	1	0.41129	lower
87	structural connectivity	Celltype	Astro	spread	0.380657	0.143659	-0.414497	685	(0.3, 3, 1)	0	0	precuneus	1	0	0.490196	lower
88	structural connectivity	Cortical expansion	scalingnih	spread	0.379837	0.190819	-0.0920478	14531	(0.01, 1.5, 0.9)	0	0	precuneus	1	0	0.490196	lower
89	structural connectivity	Celltype	OPC	mis	0.378169	0.398051	-0.626424	530	(0.9, 1.5, 1)	0	0	entorhinal	0	0	0.41129	lower
90	structural connectivity	Receptors	CB1	spread	0.374348	0.159525	-0.387199	24171	(0.9, 3, 1)	1	0	precuneus	1	1	0.490196	lower
91	structural connectivity	Receptors	A4B2	syn	0.374271	0.277318	-0.746415	12390	(0.01, 3, 1)	1	0	precuneus	1	1	0.490196	lower
92	structural connectivity	Receptors	A4B2	syn	0.373719	0.280629	-0.741801	12998	(0.01, 3, 1)	1	0	entorhinal	0	1	0.41129	lower
93	structural connectivity	Receptors	D2	spread	0.372475	0.173421	-0.179166	945	(0.7, 2.5, 0.9)	1	0	precuneus	1	1	0.490196	lower
94	structural connectivity	Cortical expansion	scalingnih	spread	0.370207	0.187605	-0.206052	5386	(0.9, 3, 0.1)	0	0	entorhinal	0	0	0.41129	lower
95	structural connectivity	Receptors	5HT2a	spread	0.361917	0.19706	-0.469422	29999	(0.7, 0.5, 0.9)	1	0	entorhinal	0	1	0.41129	lower
96	structural connectivity	Cortical expansion	evoexp	syn	0.360829	0.347479	-0.516722	622	(0.9, 1, 0.3)	0	0	entorhinal	0	0	0.41129	lower
97	structural connectivity	Receptors	M1	syn	0.360205	0.254517	-0.570948	18315	(0.01, 3, 1)	1	0	entorhinal	1	1	0.41129	lower
98	structural connectivity	Receptors	M1	syn	0.359971	0.255391	-0.57371	18900	(0.01, 3, 1)	1	0	precuneus	0	1	0.490196	lower
99	structural connectivity	metabolism	cmr02	syn	0.355397	0.298369	-0.917823	15246	(0.01, 3, 1)	1	0	precuneus	1	1	0.490196	lower
100	structural connectivity	metabolism	cmr02	syn	0.355049	0.299136	-0.917764	15531	(0.01, 3, 1)	1	0	entorhinal	0	1	0.41129	lower
101	structural connectivity	Receptors	5HT1a	syn	0.35399	0.19194	-0.236969	695	(0.5, 3, 1)	0	0	precuneus	1	0	0.490196	lower
102	structural connectivity	Receptors	D2	clear	0.353928	0.473869	-1.69689	280	(0.7, 1, 0.1)	1	0	entorhinal	1	0	0.41129	lower
103	structural connectivity	Cortical expansion	devexp	syn	0.353759	0.380121	-1.10396	967	(0.9, 0.9, 0.1)	0	0	entorhinal	1	0	0.41129	lower
104	structural connectivity	Cortical expansion	devexp	syn	0.353435	0.3551	-0.816704	407	(0.9, 0.9, 0.1)	0	0	precuneus	0	0	0.490196	lower
105	structural connectivity	metabolism	cmrglc	syn	0.353109	0.294545	-0.928158	9041	(0.01, 3, 1)	1	0	precuneus	1	1	0.490196	lower
106	structural connectivity	metabolism	cmrglc	syn	0.352537	0.296245	-0.927129	9185	(0.01, 3, 1)	1	0	entorhinal	0	1	0.41129	lower
107	structural connectivity	Cortical expansion	devexp	mis	0.351767	0.373638	-1.02104	799	(0.9, 1.9, 0.1)	0	0	entorhinal	0	0	0.41129	lower
108	structural connectivity	Receptors	5HT1b	clear	0.345506	0.228513	-0.230012	29999	(0.1, 3, 1)	0	0	entorhinal	1	0	0.41129	lower
109	structural connectivity	Receptors	M1	clear	0.343239	0.455935	-1.79945	27547	(0.01, 0.9, 0.1)	0	0	entorhinal	1	0	0.41129	lower
110	structural connectivity	Receptors	VAChT	syn	0.343198	0.245449	-0.790522	29999	(0.01, 3, 1)	1	0	precuneus	1	1	0.490196	lower
111	structural connectivity	Receptors	5HT1b	clear	0.340826	0.217477	-0.186357	29999	(0.01, 3, 0.5)	0	0	precuneus	0	0	0.490196	lower
112	structural connectivity	Celltype	Micro	spread	0.339348	0.172296	-0.364569	705	(0.7, 3, 1)	1	0	precuneus	1	1	0.490196	lower
113	structural connectivity	Celltype	Micro	spread	0.338465	0.174623	-0.292869	980	(0.9, 2.9, 1)	1	0	entorhinal	0	1	0.41129	lower
114	structural connectivity	AD-realted	Cluster3	clear	0.338313	0.191601	-0.650499	29999	(0.7, 3, 1)	0	0	precuneus	1	0	0.490196	lower
115	structural connectivity	AD-realted	Cluster2	spread	0.338313	0.191601	-0.650499	29999	(0.7, 3, 1)	0	0	precuneus	1	0	0.490196	lower
116	structural connectivity	AD-realted	Cluster5	spread	0.338313	0.191601	-0.650499	29999	(0.7, 3, 1)	0	0	precuneus	1	0	0.490196	lower
117	structural connectivity	AD-realted	Cluster2	syn	0.338313	0.191601	-0.650499	29999	(0.7, 3, 1)	1	0	precuneus	1	1	0.490196	lower
118	structural connectivity	AD-realted	Cluster5	mis	0.338313	0.191601	-0.650499	29999	(0.7, 3, 1)	0	0	precuneus	1	0	0.490196	lower
119	structural connectivity	AD-realted	Cluster3	spread	0.338313	0.191601	-0.650499	29999	(0.7, 3, 1)	0	0	precuneus	1	0	0.490196	lower
120	structural connectivity	AD-realted	Cluster5	clear	0.338313	0.191601	-0.650499	29999	(0.7, 3, 1)	0	0	precuneus	1	0	0.490196	lower
121	structural connectivity	AD-realted	Cluster3	mis	0.338313	0.191601	-0.650499	29999	(0.7, 3, 1)	0	0	precuneus	1	0	0.490196	lower
122	structural connectivity	AD-realted	Cluster4	syn	0.338313	0.191601	-0.650499	29999	(0.7, 3, 1)	1	0	precuneus	1	1	0.490196	lower
123	structural connectivity	AD-realted	Cluster2	mis	0.338313	0.191601	-0.650499	29999	(0.7, 3, 1)	0	0	precuneus	1	0	0.490196	lower
124	structural connectivity	AD-realted	Cluster4	spread	0.338313	0.191601	-0.650499	29999	(0.7, 3, 1)	0	0	precuneus	1	0	0.490196	lower
125	structural connectivity	AD-realted	Cluster4	mis	0.338313	0.191601	-0.650499	29999	(0.7, 3, 1)	0	0	precuneus	1	0	0.490196	lower
126	structural connectivity	AD-realted	Cluster5	syn	0.338313	0.191601	-0.650499	29999	(0.7, 3, 1)	1	0	precuneus	1	1	0.490196	lower
127	structural connectivity	AD-realted	Cluster6	mis	0.338313	0.191601	-0.650499	29999	(0.7, 3, 1)	0	0	precuneus	1	0	0.490196	lower
128	structural connectivity	AD-realted	Cluster6	clear	0.338313	0.191601	-0.650499	29999	(0.7, 3, 1)	0	0	precuneus	1	0	0.490196	lower
129	structural connectivity	AD-realted	Cluster3	syn	0.338313	0.191601	-0.650499	29999	(0.7, 3, 1)	1	0	precuneus	1	1	0.490196	lower
130	structural connectivity	AD-realted	Cluster2	clear	0.338313	0.191601	-0.650499	29999	(0.7, 3, 1)	0	0	precuneus	1	0	0.490196	lower
131	structural connectivity	AD-realted	Cluster6	spread	0.338313	0.191601	-0.650499	29999	(0.7, 3, 1)	0	0	precuneus	1	0	0.490196	lower
132	structural connectivity	AD-realted	Cluster1	syn	0.338313	0.191601	-0.650499	29999	(0.7, 3, 1)	1	0	precuneus	1	1	0.490196	lower
133	structural connectivity	AD-realted	Cluster6	syn	0.338313	0.191601	-0.650499	29999	(0.7, 3, 1)	1	0	precuneus	1	1	0.490196	lower
134	structural connectivity	AD-realted	Cluster1	spread	0.338313	0.191601	-0.650499	29999	(0.7, 3, 1)	0	0	precuneus	1	0	0.490196	lower
135	structural connectivity	AD-realted	Cluster7	clear	0.338313	0.191601	-0.650499	29999	(0.7, 3, 1)	0	0	precuneus	1	0	0.490196	lower
136	structural connectivity	AD-realted	Cluster1	mis	0.338313	0.191601	-0.650499	29999	(0.7, 3, 1)	0	0	precuneus	1	0	0.490196	lower
137	structural connectivity	AD-realted	Cluster7	mis	0.338313	0.191601	-0.650499	29999	(0.7, 3, 1)	0	0	precuneus	1	0	0.490196	lower
138	structural connectivity	AD-realted	Cluster1	clear	0.338313	0.191601	-0.650499	29999	(0.7, 3, 1)	0	0	precuneus	1	0	0.490196	lower
139	structural connectivity	AD-realted	Cluster7	spread	0.338313	0.191601	-0.650499	29999	(0.7, 3, 1)	0	0	precuneus	1	0	0.490196	lower
140	structural connectivity				0.338313	0.191601	-0.650499	29999	(0.7, 3, 1)	0	1	precuneus	1	0	0.490196	lower
141	structural connectivity	AD-realted	Cluster7	syn	0.338313	0.191601	-0.650499	29999	(0.7, 3, 1)	1	0	precuneus	1	1	0.490196	lower
142	structural connectivity	AD-realted	Cluster4	clear	0.338313	0.191601	-0.650499	29999	(0.7, 3, 1)	0	0	precuneus	1	0	0.490196	lower
143	structural connectivity	Celltype	Neuro-Ex	syn	0.334119	0.363909	-1.77095	6237	(0.3, 2, 0.1)	1	0	entorhinal	0	1	0.41129	lower
144	structural connectivity	AD-realted	Cluster2	mis	0.333776	0.172501	-0.336427	1777	(0.9, 2.5, 1)	0	0	entorhinal	0	0	0.41129	lower
145	structural connectivity	AD-realted	Cluster5	mis	0.333776	0.172501	-0.336427	1777	(0.9, 2.5, 1)	0	0	entorhinal	0	0	0.41129	lower
146	structural connectivity	AD-realted	Cluster6	clear	0.333776	0.172501	-0.336427	1777	(0.9, 2.5, 1)	1	0	entorhinal	0	0	0.41129	lower
147	structural connectivity	AD-realted	Cluster2	spread	0.333776	0.172501	-0.336427	1777	(0.9, 2.5, 1)	0	0	entorhinal	0	0	0.41129	lower
148	structural connectivity	AD-realted	Cluster5	syn	0.333776	0.172501	-0.336427	1777	(0.9, 2.5, 1)	1	0	entorhinal	0	1	0.41129	lower
149	structural connectivity	AD-realted	Cluster2	syn	0.333776	0.172501	-0.336427	1777	(0.9, 2.5, 1)	1	0	entorhinal	0	1	0.41129	lower
150	structural connectivity	AD-realted	Cluster3	clear	0.333776	0.172501	-0.336427	1777	(0.9, 2.5, 1)	1	0	entorhinal	0	0	0.41129	lower
151	structural connectivity	AD-realted	Cluster5	spread	0.333776	0.172501	-0.336427	1777	(0.9, 2.5, 1)	0	0	entorhinal	0	0	0.41129	lower
152	structural connectivity	AD-realted	Cluster5	clear	0.333776	0.172501	-0.336427	1777	(0.9, 2.5, 1)	0	0	entorhinal	0	0	0.41129	lower
153	structural connectivity	AD-realted	Cluster2	clear	0.333776	0.172501	-0.336427	1777	(0.9, 2.5, 1)	0	0	entorhinal	0	0	0.41129	lower
154	structural connectivity	AD-realted	Cluster1	mis	0.333776	0.172501	-0.336427	1777	(0.9, 2.5, 1)	0	0	entorhinal	0	0	0.41129	lower
155	structural connectivity	AD-realted	Cluster1	syn	0.333776	0.172501	-0.336427	1777	(0.9, 2.5, 1)	1	0	entorhinal	0	1	0.41129	lower
156	structural connectivity	AD-realted	Cluster7	spread	0.333776	0.172501	-0.336427	1777	(0.9, 2.5, 1)	0	0	entorhinal	0	0	0.41129	lower
157	structural connectivity	AD-realted	Cluster1	clear	0.333776	0.172501	-0.336427	1777	(0.9, 2.5, 1)	0	0	entorhinal	0	0	0.41129	lower
158	structural connectivity	AD-realted	Cluster7	syn	0.333776	0.172501	-0.336427	1777	(0.9, 2.5, 1)	1	0	entorhinal	0	1	0.41129	lower
159	structural connectivity	AD-realted	Cluster7	mis	0.333776	0.172501	-0.336427	1777	(0.9, 2.5, 1)	0	0	entorhinal	0	0	0.41129	lower
160	structural connectivity	AD-realted	Cluster1	spread	0.333776	0.172501	-0.336427	1777	(0.9, 2.5, 1)	0	0	entorhinal	0	0	0.41129	lower
161	structural connectivity	AD-realted	Cluster7	clear	0.333776	0.172501	-0.336427	1777	(0.9, 2.5, 1)	0	0	entorhinal	0	0	0.41129	lower
162	structural connectivity	AD-realted	Cluster4	clear	0.333776	0.172501	-0.336427	1777	(0.9, 2.5, 1)	0	0	entorhinal	0	0	0.41129	lower
163	structural connectivity	AD-realted	Cluster6	syn	0.333776	0.172501	-0.336427	1777	(0.9, 2.5, 1)	0	0	entorhinal	0	1	0.41129	lower
164	structural connectivity	AD-realted	Cluster6	spread	0.333776	0.172501	-0.336427	1777	(0.9, 2.5, 1)	0	0	entorhinal	0	0	0.41129	lower
165	structural connectivity	AD-realted	Cluster6	mis	0.333776	0.172501	-0.336427	1777	(0.9, 2.5, 1)	0	0	entorhinal	0	0	0.41129	lower
166	structural connectivity	AD-realted	Cluster4	mis	0.333776	0.172501	-0.336427	1777	(0.9, 2.5, 1)	0	0	entorhinal	0	0	0.41129	lower
167	structural connectivity	AD-realted	Cluster3	mis	0.333776	0.172501	-0.336427	1777	(0.9, 2.5, 1)	0	0	entorhinal	0	0	0.41129	lower
168	structural connectivity	AD-realted	Cluster3	spread	0.333776	0.172501	-0.336427	1777	(0.9, 2.5, 1)	0	0	entorhinal	0	0	0.41129	lower
169	structural connectivity	AD-realted	Cluster4	syn	0.333776	0.172501	-0.336427	1777	(0.9, 2.5, 1)	1	0	entorhinal	0	1	0.41129	lower
170	structural connectivity	AD-realted	Cluster3	syn	0.333776	0.172501	-0.336427	1777	(0.9, 2.5, 1)	0	0	entorhinal	0	1	0.41129	lower
171	structural connectivity	AD-realted	Cluster4	spread	0.333776	0.172501	-0.336427	1777	(0.9, 2.5, 1)	0	0	entorhinal	0	0	0.41129	lower
172	structural connectivity				0.333776	0.172501	-0.336427	1777	(0.9, 2.5, 1)	0	1	entorhinal	0	0	0.41129	lower
173	structural connectivity	Receptors	5HT1a	syn	0.329735	0.201189	-0.319667	1124	(0.5, 3, 1)	0	0	entorhinal	0	0	0.41129	lower
174	structural connectivity	Celltype	Oligo	syn	0.328745	0.286463	-0.501843	29999	(0.01, 3, 1)	1	0	precuneus	1	1	0.490196	lower
175	structural connectivity	Celltype	Astro	spread	0.326959	0.192305	-0.232835	976	(0.9, 3, 1)	1	0	entorhinal	0	0	0.41129	lower
176	structural connectivity	Celltype	Neuro-Ex	mis	0.32519	0.376051	-1.37175	17280	(0.3, 2.9, 0.1)	0	0	entorhinal	0	0	0.41129	lower
177	structural connectivity	Receptors	D2	spread	0.323066	0.180774	-0.332042	992	(0.9, 3, 1)	0	0	entorhinal	0	1	0.41129	lower
178	structural connectivity	Receptors	A4B2	spread	0.320313	0.180251	-0.339297	858	(0.9, 3, 0.9)	0	0	entorhinal	1	0	0.41129	lower
179	structural connectivity	Receptors	CB1	spread	0.317127	0.167018	-0.44694	2648	(0.9, 1.5, 0.1)	1	0	entorhinal	0	1	0.41129	lower
180	structural connectivity	Cortical expansion	scalingpnc	mis	0.314381	0.240832	-0.656364	29999	(0.01, 1, 0.9)	0	0	entorhinal	0	0	0.41129	lower
181	structural connectivity	Cortical expansion	scalingnih	clear	0.314185	0.397978	-0.862012	100	(0.01, 1.5, 0.7)	0	0	precuneus	1	0	0.490196	lower
182	structural connectivity	Receptors	NMDA	syn	0.312267	0.232075	-0.832556	29999	(0.01, 3, 1)	1	0	precuneus	1	1	0.490196	lower
183	structural connectivity	Receptors	5HT1a	mis	0.312087	0.177736	-0.413489	29999	(0.3, 3, 1)	0	0	entorhinal	1	0	0.41129	lower
184	structural connectivity	Receptors	5HT1a	mis	0.312058	0.177736	-0.413566	29999	(0.3, 3, 1)	0	0	precuneus	0	0	0.490196	lower
185	structural connectivity	Microstructure	myelinmap	clear	0.311262	0.259284	-0.262428	29999	(0.9, 3, 1)	1	0	entorhinal	1	1	0.41129	lower
186	structural connectivity	Microstructure	myelinmap	clear	0.31102	0.259071	-0.263082	29999	(0.9, 3, 1)	1	0	precuneus	0	1	0.490196	lower
187	structural connectivity	Celltype	Neuro-In	spread	0.310924	0.202294	-0.565683	1115	(0.9, 3, 0.9)	0	0	entorhinal	1	0	0.41129	lower
188	structural connectivity	Celltype	Neuro-Ex	spread	0.310448	0.224497	-0.55338	1041	(0.9, 3, 1)	0	0	entorhinal	1	0	0.41129	lower
189	structural connectivity	Celltype	OPC	syn	0.308436	0.382054	-0.656192	225	(0.9, 1.5, 0.7)	0	0	entorhinal	0	1	0.41129	lower
190	structural connectivity	Receptors	5HTT	syn	0.305682	0.18382	-0.791611	29999	(0.01, 0.9, 0.3)	0	0	entorhinal	0	0	0.41129	lower
191	structural connectivity	Celltype	Neuro-In	spread	0.30494	0.190824	-0.692073	483	(0.5, 3, 1)	0	0	precuneus	0	0	0.490196	lower
192	structural connectivity	Receptors	5HT2a	syn	0.304711	0.398361	-1.06401	1204	(0.3, 2.9, 0.1)	0	0	entorhinal	0	0	0.41129	lower
193	structural connectivity	Receptors	5HT2a	mis	0.304162	0.196451	-0.283952	29999	(0.7, 2, 0.3)	0	0	entorhinal	0	0	0.41129	lower
194	structural connectivity	Receptors	5HT6	syn	0.303868	0.287069	-1.0242	29999	(0.01, 3, 1)	1	0	entorhinal	1	1	0.41129	lower
195	structural connectivity	Receptors	5HT6	syn	0.303831	0.286539	-1.02475	29999	(0.01, 3, 1)	1	0	precuneus	0	1	0.490196	lower
196	structural connectivity	Receptors	CB1	syn	0.30252	0.53054	-1.25696	0	(0.9, 3, 1)	0	0	precuneus	1	0	0.490196	lower
197	structural connectivity	Receptors	A4B2	clear	0.302244	0.530825	-1.16766	0	(0.9, 0.9, 0.1)	0	0	precuneus	1	0	0.490196	lower
198	structural connectivity	Microstructure	thickness	syn	0.302206	0.530862	-1.15986	0	(0.9, 0.9, 0.1)	0	0	precuneus	1	0	0.490196	lower
199	structural connectivity	Celltype	Neuro-In	clear	0.301836	0.531208	-1.10065	0	(0.01, 3, 1)	0	0	precuneus	1	0	0.490196	lower
200	structural connectivity	Celltype	Neuro-Ex	clear	0.301804	0.531239	-1.09632	0	(0.01, 2.9, 1)	0	0	precuneus	1	0	0.490196	lower
201	structural connectivity	Receptors	GABAa	clear	0.301679	0.531356	-1.08044	0	(0.05, 2.5, 0.1)	1	0	precuneus	1	1	0.490196	lower
202	structural connectivity	Receptors	D2	syn	0.301592	0.531438	-1.07013	0	(0.9, 1.5, 0.1)	0	0	precuneus	1	0	0.490196	lower
203	structural connectivity	Receptors	M1	clear	0.301584	0.531446	-1.06913	0	(0.9, 0.1, 0.3)	0	0	precuneus	0	0	0.490196	lower
204	structural connectivity	Receptors	DAT	syn	0.301456	0.531567	-1.05483	0	(0.5, 3, 1)	1	0	precuneus	1	1	0.490196	lower
205	structural connectivity	Receptors	mGluR5	clear	0.301455	0.531567	-1.05477	0	(0.01, 3, 1)	0	0	precuneus	1	0	0.490196	lower
206	structural connectivity	Receptors	D1	clear	0.301436	0.531585	-1.05275	0	(0.01, 3, 1)	1	0	precuneus	1	1	0.490196	lower
207	structural connectivity	Receptors	5HT2a	clear	0.301399	0.531621	-1.04876	0	(0.5, 0.5, 0.1)	0	0	precuneus	1	0	0.490196	lower
208	structural connectivity	Microstructure	genepc1	clear	0.301398	0.531621	-1.04873	0	(0.7, 3, 1)	1	0	precuneus	1	1	0.490196	lower
209	structural connectivity	Receptors	VAChT	clear	0.301372	0.531647	-1.04593	0	(0.9, 0.5, 0.1)	0	0	precuneus	1	0	0.490196	lower
210	structural connectivity	Receptors	D1	mis	0.301355	0.531662	-1.04421	0	(0.1, 3, 1)	0	0	precuneus	1	0	0.490196	lower
211	structural connectivity	AD-realted	APOE	clear	0.301287	0.531728	-1.03725	0	(0.7, 3, 1)	1	0	precuneus	1	1	0.490196	lower
212	structural connectivity	Receptors	5HT1a	clear	0.301269	0.531745	-1.03543	0	(0.01, 3, 1)	0	0	precuneus	1	0	0.490196	lower
213	structural connectivity	Receptors	MOR	mis	0.301213	0.531717	-1.04072	0	(0.9, 3, 1)	0	0	precuneus	1	0	0.490196	lower
214	structural connectivity	Celltype	Micro	clear	0.301201	0.531711	-1.04197	0	(0.01, 3, 1)	0	0	precuneus	1	0	0.490196	lower
215	structural connectivity	Microstructure	myelinmap	syn	0.301191	0.531706	-1.04298	0	(0.01, 3, 1)	0	0	precuneus	1	0	0.490196	lower
216	structural connectivity	Receptors	5HT6	spread	0.301169	0.531694	-1.0452	0	(0.9, 3, 1)	0	0	precuneus	1	0	0.490196	lower
217	structural connectivity	Receptors	GABAa	spread	0.301169	0.531694	-1.0452	0	(0.9, 3, 1)	0	0	precuneus	1	0	0.490196	lower
218	structural connectivity	Receptors	D1	spread	0.301169	0.531694	-1.0452	0	(0.9, 3, 1)	0	0	precuneus	1	0	0.490196	lower
219	structural connectivity	Receptors	M1	spread	0.301169	0.531694	-1.0452	0	(0.9, 3, 1)	0	0	precuneus	1	0	0.490196	lower
220	structural connectivity	metabolism	cbv	spread	0.301169	0.531694	-1.04526	0	(0.9, 2.9, 1)	1	0	precuneus	1	1	0.490196	lower
221	structural connectivity	Celltype	Neuro-Ex	spread	0.301166	0.186459	-0.738806	474	(0.5, 3, 1)	0	0	precuneus	0	0	0.490196	lower
222	structural connectivity	Receptors	GABAa	clear	0.301164	0.330139	-0.152512	29999	(0.9, 3, 1)	1	0	entorhinal	0	1	0.41129	lower
223	structural connectivity	AD-realted	MAPT	clear	0.301155	0.531687	-1.04665	0	(0.01, 3, 1)	0	0	precuneus	1	0	0.490196	lower
224	structural connectivity	Celltype	Micro	mis	0.301152	0.531685	-1.04696	0	(0.01, 3, 1)	0	0	precuneus	1	0	0.490196	lower
225	structural connectivity	metabolism	cbv	mis	0.301134	0.531676	-1.04873	0	(0.01, 3, 1)	0	0	precuneus	1	0	0.490196	lower
226	structural connectivity	Receptors	D2	mis	0.301118	0.531668	-1.05033	0	(0.9, 2.9, 0.1)	0	0	precuneus	1	0	0.490196	lower
227	structural connectivity	Receptors	DAT	spread	0.301079	0.531649	-1.05421	0	(0.7, 3, 1)	0	0	precuneus	1	0	0.490196	lower
228	structural connectivity	Microstructure	thickness	mis	0.301074	0.531647	-1.0547	0	(0.9, 1.9, 0.1)	0	0	precuneus	1	0	0.490196	lower
229	structural connectivity	Receptors	NMDA	spread	0.301037	0.531629	-1.05835	0	(0.5, 3, 1)	0	0	precuneus	1	0	0.490196	lower
230	structural connectivity	Microstructure	myelinmap	spread	0.301037	0.531629	-1.05835	0	(0.5, 3, 1)	0	0	precuneus	1	0	0.490196	lower
231	structural connectivity	metabolism	cbv	clear	0.301006	0.531616	-1.06128	0	(0.01, 3, 1)	0	0	precuneus	1	0	0.490196	lower
232	structural connectivity	Receptors	MOR	clear	0.300993	0.53161	-1.06259	0	(0.01, 3, 1)	0	0	precuneus	1	0	0.490196	lower
233	structural connectivity	Receptors	M1	mis	0.300982	0.531605	-1.06364	0	(0.01, 1.9, 1)	0	0	precuneus	1	0	0.490196	lower
234	structural connectivity	Receptors	GABAa	mis	0.300933	0.531584	-1.06831	0	(0.01, 0.1, 1)	0	0	precuneus	1	0	0.490196	lower
235	structural connectivity	Cortical expansion	devexp	clear	0.300931	0.531584	-1.06848	0	(0.01, 0.1, 1)	0	0	precuneus	1	0	0.490196	lower
236	structural connectivity	Celltype	Endo	mis	0.30093	0.531583	-1.06854	0	(0.01, 0.1, 1)	0	0	precuneus	1	0	0.490196	lower
237	structural connectivity	Receptors	mGluR5	mis	0.300927	0.531582	-1.06885	0	(0.01, 0.1, 1)	0	0	precuneus	1	0	0.490196	lower
238	structural connectivity	Receptors	A4B2	mis	0.30092	0.531579	-1.06951	0	(0.01, 0.1, 1)	0	0	precuneus	1	0	0.490196	lower
239	structural connectivity	Receptors	5HTT	mis	0.300914	0.531577	-1.07002	0	(0.01, 0.1, 1)	0	0	precuneus	1	0	0.490196	lower
240	structural connectivity	Receptors	VAChT	mis	0.300911	0.531576	-1.07035	0	(0.01, 0.1, 1)	0	0	precuneus	1	0	0.490196	lower
241	structural connectivity	Microstructure	genepc1	mis	0.30091	0.531575	-1.0704	0	(0.01, 0.1, 1)	0	0	precuneus	1	0	0.490196	lower
242	structural connectivity	Receptors	5HTT	spread	0.30091	0.531575	-1.07041	0	(0.01, 0.1, 1)	0	0	precuneus	1	0	0.490196	lower
243	structural connectivity	Celltype	Oligo	spread	0.30091	0.531575	-1.07041	0	(0.01, 0.1, 1)	0	0	precuneus	1	0	0.490196	lower
244	structural connectivity	Receptors	H3	spread	0.30091	0.531575	-1.07041	0	(0.01, 0.1, 1)	0	0	precuneus	1	0	0.490196	lower
245	structural connectivity	Receptors	NET	spread	0.30091	0.531575	-1.07041	0	(0.01, 0.1, 1)	0	0	precuneus	1	0	0.490196	lower
246	structural connectivity	Microstructure	genepc1	spread	0.30091	0.531575	-1.07041	0	(0.01, 0.1, 1)	0	0	precuneus	1	0	0.490196	lower
247	structural connectivity	Receptors	5HT1b	spread	0.30091	0.531575	-1.07041	0	(0.01, 0.1, 1)	0	0	precuneus	1	0	0.490196	lower
248	structural connectivity	metabolism	cmr02	spread	0.30091	0.531575	-1.07041	0	(0.01, 0.1, 1)	0	0	precuneus	1	0	0.490196	lower
249	structural connectivity	Receptors	A4B2	spread	0.30091	0.531575	-1.07041	0	(0.01, 0.1, 1)	0	0	precuneus	0	0	0.490196	lower
250	structural connectivity	metabolism	cmrglc	spread	0.30091	0.531575	-1.07041	0	(0.01, 0.1, 1)	0	0	precuneus	1	0	0.490196	lower
251	structural connectivity	Receptors	VAChT	spread	0.30091	0.531575	-1.07041	0	(0.01, 0.1, 1)	0	0	precuneus	1	0	0.490196	lower
252	structural connectivity	metabolism	cbf	spread	0.30091	0.531575	-1.07041	0	(0.01, 0.1, 1)	0	0	precuneus	1	0	0.490196	lower
253	structural connectivity	Celltype	Endo	spread	0.30091	0.531575	-1.07041	0	(0.01, 0.1, 1)	0	0	precuneus	1	0	0.490196	lower
254	structural connectivity	AD-realted	APOE	spread	0.30091	0.531575	-1.07041	0	(0.01, 0.1, 1)	0	0	precuneus	1	0	0.490196	lower
255	structural connectivity	Receptors	5HT6	mis	0.30091	0.531575	-1.07043	0	(0.01, 0.1, 1)	0	0	precuneus	1	0	0.490196	lower
256	structural connectivity	AD-realted	APOE	mis	0.30091	0.531575	-1.07047	0	(0.01, 0.1, 1)	0	0	precuneus	1	0	0.490196	lower
257	structural connectivity	metabolism	cmrglc	mis	0.300908	0.531574	-1.07062	0	(0.01, 0.1, 1)	0	0	precuneus	1	0	0.490196	lower
258	structural connectivity	metabolism	cmr02	mis	0.300907	0.531574	-1.07068	0	(0.01, 0.1, 1)	0	0	precuneus	1	0	0.490196	lower
259	structural connectivity	Receptors	CB1	mis	0.300895	0.531569	-1.07188	0	(0.9, 3, 1)	0	0	precuneus	1	0	0.490196	lower
260	structural connectivity	AD-realted	APOE	syn	0.300867	0.531559	-1.07441	0	(0.01, 3, 1)	0	0	precuneus	1	0	0.490196	lower
261	structural connectivity	Receptors	DAT	mis	0.300854	0.531554	-1.07563	0	(0.01, 3, 1)	0	0	precuneus	1	0	0.490196	lower
262	structural connectivity	Receptors	H3	mis	0.300853	0.531553	-1.07576	0	(0.01, 3, 1)	0	0	precuneus	1	0	0.490196	lower
263	structural connectivity	metabolism	cbv	syn	0.300846	0.531551	-1.07637	0	(0.01, 3, 1)	0	0	precuneus	1	0	0.490196	lower
264	structural connectivity	metabolism	cmrglc	clear	0.300846	0.53155	-1.07639	0	(0.01, 3, 1)	0	0	precuneus	1	0	0.490196	lower
265	structural connectivity	Receptors	D2	clear	0.30084	0.531548	-1.07693	0	(0.01, 1.5, 0.1)	0	0	precuneus	0	0	0.490196	lower
266	structural connectivity	Receptors	5HT1b	mis	0.300839	0.531548	-1.07702	0	(0.01, 3, 1)	0	0	precuneus	1	0	0.490196	lower
267	structural connectivity	Microstructure	myelinmap	mis	0.30082	0.531541	-1.07879	0	(0.01, 3, 1)	0	0	precuneus	1	0	0.490196	lower
268	structural connectivity	Microstructure	genepc1	syn	0.30079	0.53153	-1.08151	0	(0.01, 3, 1)	0	0	precuneus	1	0	0.490196	lower
269	structural connectivity	Cortical expansion	evoexp	clear	0.300788	0.53153	-1.08166	0	(0.9, 0.1, 1)	0	0	precuneus	1	0	0.490196	lower
270	structural connectivity	Receptors	NET	mis	0.300782	0.531527	-1.08221	0	(0.01, 3, 1)	0	0	precuneus	1	0	0.490196	lower
271	structural connectivity	Receptors	NMDA	mis	0.300761	0.53152	-1.08405	0	(0.01, 3, 1)	0	0	precuneus	1	0	0.490196	lower
272	structural connectivity	metabolism	cbf	mis	0.300745	0.531515	-1.0855	0	(0.01, 3, 1)	0	0	precuneus	1	0	0.490196	lower
273	structural connectivity	Receptors	MOR	syn	0.300711	0.531504	-1.08853	0	(0.9, 3, 0.1)	0	0	precuneus	1	0	0.490196	lower
274	structural connectivity	Receptors	5HT6	clear	0.300654	0.531486	-1.09355	0	(0.01, 3, 1)	0	0	precuneus	1	0	0.490196	lower
275	structural connectivity	metabolism	cmr02	clear	0.300653	0.531485	-1.09363	0	(0.7, 3, 1)	0	0	precuneus	1	0	0.490196	lower
276	structural connectivity	Receptors	NMDA	clear	0.300554	0.531457	-1.10217	0	(0.1, 3, 1)	0	0	precuneus	1	0	0.490196	lower
277	structural connectivity	Receptors	H3	clear	0.300497	0.531442	-1.10698	0	(0.9, 0.9, 1)	0	0	precuneus	1	0	0.490196	lower
278	structural connectivity	Celltype	Astro	clear	0.300432	0.531425	-1.11243	0	(0.9, 0.1, 0.1)	0	0	precuneus	1	0	0.490196	lower
279	structural connectivity	Celltype	Micro	syn	0.300384	0.531414	-1.11645	0	(0.1, 3, 1)	0	0	precuneus	1	0	0.490196	lower
280	structural connectivity	Receptors	DAT	clear	0.300335	0.531403	-1.12042	0	(0.9, 0.1, 0.1)	0	0	precuneus	1	0	0.490196	lower
281	structural connectivity	Receptors	mGluR5	syn	0.300272	0.53139	-1.12547	0	(0.01, 3, 1)	0	0	precuneus	1	0	0.490196	lower
282	structural connectivity	Receptors	5HT4	clear	0.300245	0.531385	-1.12762	0	(0.9, 0.1, 1)	0	0	precuneus	1	0	0.490196	lower
283	structural connectivity	Receptors	GABAa	syn	0.300038	0.531349	-1.14379	0	(0.01, 3, 1)	0	0	precuneus	1	0	0.490196	lower
284	structural connectivity	AD-realted	Abeta	clear	0.29991	0.531332	-1.15349	0	(0.9, 0.1, 0.1)	0	0	precuneus	1	0	0.490196	lower
285	structural connectivity	Celltype	Oligo	mis	0.299401	0.531288	-1.18996	0	(0.01, 3, 1)	0	0	precuneus	1	0	0.490196	lower
286	structural connectivity	Cortical expansion	scaling	clear	0.299117	0.53128	-1.20905	0	(0.7, 0.1, 0.1)	0	0	precuneus	1	0	0.490196	lower
287	structural connectivity	Microstructure	thickness	clear	0.298996	0.531279	-1.21695	0	(0.9, 0.1, 0.1)	0	0	precuneus	1	0	0.490196	lower
288	structural connectivity	Cortical expansion	scalinghcp	clear	0.298711	0.531283	-1.23514	0	(0.7, 0.1, 0.1)	0	0	precuneus	1	0	0.490196	lower
289	structural connectivity	Receptors	D1	syn	0.298367	0.531297	-1.25626	0	(0.9, 0.1, 0.1)	0	0	precuneus	1	0	0.490196	lower
290	structural connectivity	Cortical expansion	scalingpnc	clear	0.297844	0.531335	-1.28679	0	(0.9, 0.1, 0.1)	0	0	precuneus	1	0	0.490196	lower
291	structural connectivity	Celltype	Oligo	clear	0.297628	0.531356	-1.29894	0	(0.1, 1.5, 0.3)	0	0	precuneus	1	0	0.490196	lower
292	structural connectivity	Receptors	CB1	clear	0.296504	0.531501	-1.35837	0	(0.9, 0.1, 0.1)	0	0	precuneus	1	0	0.490196	lower
293	structural connectivity	Celltype	OPC	clear	0.296048	0.531575	-1.38095	0	(0.9, 0.1, 0.1)	0	0	precuneus	1	0	0.490196	lower
294	structural connectivity	metabolism	cmr02	clear	0.292563	0.225057	-0.357692	29999	(0.7, 3, 1)	0	0	entorhinal	0	0	0.41129	lower
295	structural connectivity	Microstructure	myelinmap	syn	0.292214	0.239471	-1.0461	9127	(0.01, 3, 1)	0	0	entorhinal	0	0	0.41129	lower
296	structural connectivity	Receptors	D1	spread	0.285899	0.185841	-0.414699	814	(0.9, 2.9, 1)	1	0	entorhinal	0	0	0.41129	lower
297	structural connectivity	Celltype	Oligo	spread	0.284833	0.208395	-0.29525	895	(0.9, 3, 1)	1	0	entorhinal	0	0	0.41129	lower
298	structural connectivity	AD-realted	APOE	spread	0.284025	0.234044	-0.33158	807	(0.9, 3, 1)	1	0	entorhinal	0	0	0.41129	lower
299	structural connectivity	Receptors	GABAa	syn	0.283652	0.277491	-1.15156	29999	(0.01, 3, 1)	0	0	entorhinal	0	0	0.41129	lower
300	structural connectivity	Receptors	M1	spread	0.277151	0.191956	-0.404752	666	(0.9, 3, 0.9)	0	0	entorhinal	0	0	0.41129	lower
301	structural connectivity	Receptors	NET	spread	0.275243	0.183905	-0.476665	667	(0.9, 3, 1)	0	0	entorhinal	0	0	0.41129	lower
302	structural connectivity	Celltype	Endo	syn	0.2716	0.20507	-0.861124	29999	(0.01, 0.9, 0.3)	0	0	entorhinal	0	1	0.41129	lower
303	structural connectivity	Receptors	5HT6	spread	0.270928	0.203691	-0.361477	604	(0.9, 3, 1)	0	0	entorhinal	0	0	0.41129	lower
304	structural connectivity	Celltype	Oligo	clear	0.268002	0.211748	-0.335915	29999	(0.1, 1.5, 0.3)	0	0	entorhinal	0	0	0.41129	lower
305	structural connectivity	AD-realted	APOE	syn	0.267184	0.264255	-1.16646	8069	(0.01, 3, 1)	0	0	entorhinal	0	0	0.41129	lower
306	structural connectivity	Celltype	Astro	mis	0.2669	0.193354	-0.434862	29999	(0.05, 3, 0.7)	0	0	entorhinal	0	0	0.41129	lower
307	structural connectivity	metabolism	cmrglc	spread	0.26206	0.229183	-0.4689	665	(0.9, 3, 1)	0	0	entorhinal	0	0	0.41129	lower
308	structural connectivity	Microstructure	genepc1	spread	0.260621	0.243218	-0.27361	704	(0.9, 3, 1)	1	0	entorhinal	0	0	0.41129	lower
309	structural connectivity	Receptors	NMDA	syn	0.259213	0.150201	-1.14663	29999	(0.01, 0.9, 0.5)	1	0	entorhinal	0	1	0.41129	lower
310	structural connectivity	Microstructure	genepc1	syn	0.25903	0.271866	-1.16189	12322	(0.01, 3, 1)	0	0	entorhinal	0	0	0.41129	lower
311	structural connectivity	Receptors	VAChT	spread	0.257369	0.189606	-0.500344	620	(0.9, 3, 1)	1	0	entorhinal	0	0	0.41129	lower
312	structural connectivity	Microstructure	genepc1	clear	0.25697	0.305924	-0.45004	29999	(0.7, 3, 1)	0	0	entorhinal	0	1	0.41129	lower
313	structural connectivity	Receptors	H3	spread	0.254006	0.234604	-0.334668	566	(0.9, 3, 1)	0	0	entorhinal	0	0	0.41129	lower
314	structural connectivity	AD-realted	APOE	clear	0.251735	0.26025	-0.347332	29999	(0.5, 3, 1)	0	0	entorhinal	0	1	0.41129	lower
315	structural connectivity	Receptors	5HT6	clear	0.249131	0.28876	-0.410464	29999	(0.7, 3, 1)	0	0	entorhinal	0	0	0.41129	lower
316	structural connectivity	Receptors	GABAa	spread	0.248767	0.213522	-0.382946	650	(0.9, 3, 1)	0	0	entorhinal	0	0	0.41129	lower
317	structural connectivity	Receptors	H3	clear	0.244684	0.354362	-0.341152	29999	(0.7, 3, 1)	0	0	entorhinal	0	0	0.41129	lower
318	structural connectivity	Receptors	5HT1b	spread	0.241055	0.20482	-0.475722	558	(0.9, 3, 0.9)	0	0	entorhinal	0	0	0.41129	lower
319	structural connectivity	Receptors	NMDA	spread	0.239375	0.204378	-0.46448	593	(0.9, 3, 1)	0	0	entorhinal	0	0	0.41129	lower
320	structural connectivity	Microstructure	myelinmap	spread	0.237424	0.209509	-0.637289	544	(0.9, 3, 1)	0	0	entorhinal	0	0	0.41129	lower
321	structural connectivity	Receptors	DAT	spread	0.235419	0.212531	-0.43877	605	(0.9, 2.9, 1)	1	0	entorhinal	0	0	0.41129	lower
322	structural connectivity	Receptors	VAChT	clear	0.232826	0.25924	-0.267479	155	(0.7, 3, 1)	0	0	entorhinal	0	0	0.41129	lower
323	structural connectivity	metabolism	cbv	spread	0.232718	0.224449	-0.377034	565	(0.9, 3, 1)	1	0	entorhinal	0	1	0.41129	lower
324	structural connectivity	metabolism	cmrglc	clear	0.232113	0.263531	-0.286499	29999	(0.5, 3, 1)	0	0	entorhinal	0	0	0.41129	lower
325	structural connectivity	metabolism	cmr02	spread	0.229183	0.207643	-0.650362	545	(0.9, 3, 1)	0	0	entorhinal	0	0	0.41129	lower
326	structural connectivity	Receptors	VAChT	syn	0.227872	0.159159	-1.32384	29999	(0.01, 0.9, 0.5)	0	0	entorhinal	0	1	0.41129	lower
327	structural connectivity	Celltype	Astro	syn	0.220242	0.228418	-0.398951	29999	(0.9, 1.5, 1)	0	0	entorhinal	0	1	0.41129	lower
328	structural connectivity	Receptors	NET	clear	0.207483	0.240955	-0.460746	131	(0.7, 3, 1)	0	0	entorhinal	0	1	0.41129	lower
329	structural connectivity	Receptors	D2	syn	0.192364	0.326163	-0.372605	1199	(0.9, 0.9, 0.1)	0	0	entorhinal	0	0	0.41129	lower
330	structural connectivity	Receptors	D2	mis	0.186899	0.331863	-0.378989	970	(0.9, 1.9, 0.1)	0	0	entorhinal	0	0	0.41129	lower
331	structural connectivity	Receptors	CB1	syn	0.179786	0.37755	-0.653112	29999	(0.9, 3, 0.1)	0	0	entorhinal	0	0	0.41129	lower
332	structural connectivity	Celltype	Neuro-In	syn	0.174805	0.276684	-1.0339	29999	(0.01, 2, 0.1)	0	0	entorhinal	0	0	0.41129	lower
333	structural connectivity	Receptors	5HTT	spread	0.170364	0.220244	-0.697243	437	(0.9, 3, 1)	0	0	entorhinal	0	0	0.41129	lower
334	structural connectivity	Celltype	Endo	spread	0.170221	0.216896	-0.63798	539	(0.9, 3, 1)	0	0	entorhinal	0	0	0.41129	lower
335	structural connectivity	Receptors	A4B2	clear	0.169862	0.307294	-0.422699	97	(0.7, 3, 1)	0	0	entorhinal	0	0	0.41129	lower
336	structural connectivity	Receptors	D1	syn	0.168361	0.208568	-1.15026	29999	(0.01, 1.5, 0.5)	0	0	entorhinal	0	0	0.41129	lower
337	structural connectivity	Celltype	Oligo	syn	0.164826	0.257367	-1.17239	29999	(0.01, 0.9, 0.3)	0	0	entorhinal	0	1	0.41129	lower
338	structural connectivity	metabolism	cbf	spread	0.148608	0.197593	-1.10665	620	(0.9, 3, 0.1)	0	0	entorhinal	0	0	0.41129	lower
339	structural connectivity	metabolism	cbv	syn	0.148249	0.244444	-1.39239	29999	(0.01, 0.9, 0.3)	0	0	entorhinal	0	0	0.41129	lower
340	structural connectivity	Microstructure	thickness	mis	0.133106	0.281423	-0.462749	29999	(0.9, 2, 0.1)	0	0	entorhinal	0	0	0.41129	lower
341	structural connectivity	Microstructure	thickness	syn	0.132823	0.221129	-0.795764	29999	(0.7, 1.5, 0.1)	0	0	entorhinal	0	0	0.41129	lower
342	structural connectivity	Celltype	Micro	mis	0.130053	0.224037	-0.785791	29999	(0.01, 1.5, 0.5)	0	0	entorhinal	0	0	0.41129	lower
343	structural connectivity	Receptors	M1	mis	0.100897	0.323727	-1.81309	29999	(0.01, 1, 1)	0	0	entorhinal	0	0	0.41129	lower
344	structural connectivity	Receptors	DAT	syn	0.0982464	0.307014	-1.47976	24460	(0.01, 1.5, 0.1)	0	0	entorhinal	0	1	0.41129	lower
345	structural connectivity	Receptors	mGluR5	syn	0.0964375	0.177838	-1.65909	29999	(0.01, 0.9, 1)	0	0	entorhinal	0	0	0.41129	lower
346	structural connectivity	Receptors	NMDA	clear	0.073356	0.382894	-1.83477	29999	(0.05, 0.5, 0.1)	0	0	entorhinal	0	0	0.41129	lower
347	structural connectivity	Celltype	Micro	syn	0.063354	0.298489	-2.27262	29999	(0.01, 2, 0.1)	0	0	entorhinal	0	0	0.41129	lower
348	structural connectivity	Receptors	CB1	mis	0.0609711	0.326109	-2.07563	29999	(0.01, 1, 1)	0	0	entorhinal	0	0	0.41129	lower
349	structural connectivity	Celltype	Neuro-Ex	clear	0.0608643	0.294204	-1.47834	29999	(0.01, 0.5, 0.9)	0	0	entorhinal	0	0	0.41129	lower
350	structural connectivity	Receptors	DAT	clear	0.054449	0.424016	-1.80205	29999	(0.01, 0.5, 0.1)	0	0	entorhinal	0	0	0.41129	lower
351	structural connectivity	Receptors	D1	clear	0.0516714	0.393389	-1.85983	29999	(0.01, 0.5, 0.1)	0	0	entorhinal	0	1	0.41129	lower
352	structural connectivity	Celltype	Neuro-In	clear	0.0478715	0.282226	-1.5289	29999	(0.01, 0.5, 0.5)	0	0	entorhinal	0	0	0.41129	lower
353	structural connectivity	Receptors	mGluR5	mis	0.0408162	0.465837	-1.78429	29999	(0.01, 1.5, 0.1)	0	0	entorhinal	0	0	0.41129	lower
354	structural connectivity	Receptors	5HT2a	clear	0.0398705	0.434027	-1.61032	29999	(0.01, 0.5, 0.1)	0	0	entorhinal	0	0	0.41129	lower
355	structural connectivity	metabolism	cbv	clear	0.0347472	0.474048	-1.82787	29999	(0.01, 0.5, 0.1)	0	0	entorhinal	0	0	0.41129	lower
356	structural connectivity	Receptors	mGluR5	clear	0.0330612	0.434444	-1.72051	18249	(0.01, 0.5, 0.1)	0	0	entorhinal	0	0	0.41129	lower
357	structural connectivity	Celltype	Astro	clear	0.0330186	0.461443	-1.7949	29999	(0.01, 0.5, 0.1)	0	0	entorhinal	0	0	0.41129	lower
358	structural connectivity	AD-realted	Abeta	clear	0.0303541	0.462567	-1.71048	29999	(0.01, 0.1, 0.1)	0	0	entorhinal	0	0	0.41129	lower
359	structural connectivity	Receptors	MOR	mis	0.0301927	0.467647	-1.93908	29999	(0.01, 1.5, 0.1)	0	0	entorhinal	0	0	0.41129	lower
360	structural connectivity	Cortical expansion	scalingpnc	clear	0.0297897	0.47358	-1.82035	29999	(0.01, 0.1, 0.1)	0	0	entorhinal	0	0	0.41129	lower
361	structural connectivity	Cortical expansion	devexp	clear	0.0296452	0.462394	-1.72724	29999	(0.01, 0.1, 0.1)	0	0	entorhinal	0	0	0.41129	lower
362	structural connectivity	Receptors	D1	mis	0.0282599	0.446369	-1.80793	20808	(0.01, 1.9, 0.1)	0	0	entorhinal	0	0	0.41129	lower
363	structural connectivity	Receptors	CB1	clear	0.0282512	0.479189	-1.80073	29999	(0.01, 0.1, 0.1)	0	0	entorhinal	0	0	0.41129	lower
364	structural connectivity	Receptors	NMDA	mis	0.0281336	0.433275	-1.77786	27124	(0.01, 1.9, 0.1)	0	0	entorhinal	0	0	0.41129	lower
365	structural connectivity	Celltype	Oligo	mis	0.0274659	0.484203	-1.79594	29999	(0.01, 1, 0.1)	0	0	entorhinal	0	0	0.41129	lower
366	structural connectivity	AD-realted	APOE	mis	0.02696	0.476423	-1.7757	29999	(0.01, 0.9, 0.1)	0	0	entorhinal	0	0	0.41129	lower
367	structural connectivity	Microstructure	genepc1	mis	0.0266489	0.473376	-1.75539	29999	(0.01, 0.9, 0.1)	0	0	entorhinal	0	0	0.41129	lower
368	structural connectivity	Receptors	A4B2	mis	0.025362	0.492558	-1.7783	29999	(0.01, 0.5, 0.1)	0	0	entorhinal	0	0	0.41129	lower
369	structural connectivity	metabolism	cmrglc	mis	0.0253498	0.487418	-1.78386	29999	(0.01, 0.5, 0.1)	0	0	entorhinal	0	0	0.41129	lower
370	structural connectivity	Cortical expansion	evoexp	clear	0.0249667	0.475976	-1.7649	29999	(0.01, 0.1, 0.1)	0	0	entorhinal	0	0	0.41129	lower
371	structural connectivity	Microstructure	myelinmap	mis	0.0245741	0.469299	-1.76669	29999	(0.01, 1, 0.1)	0	0	entorhinal	0	0	0.41129	lower
372	structural connectivity	Receptors	5HT6	mis	0.0239821	0.462866	-1.79165	29999	(0.01, 1.5, 0.1)	0	0	entorhinal	0	0	0.41129	lower
373	structural connectivity	Receptors	NET	mis	0.023805	0.490261	-1.78801	29999	(0.01, 0.5, 0.1)	0	0	entorhinal	0	0	0.41129	lower
374	structural connectivity	metabolism	cmr02	mis	0.0235254	0.474776	-1.79051	29999	(0.01, 0.9, 0.1)	0	0	entorhinal	0	0	0.41129	lower
375	structural connectivity	Celltype	Micro	clear	0.0233779	0.466904	-1.77401	23909	(0.01, 0.5, 0.1)	0	0	entorhinal	0	0	0.41129	lower
376	structural connectivity	Receptors	H3	mis	0.0230226	0.494484	-1.78683	29999	(0.01, 0.1, 0.1)	0	0	entorhinal	0	0	0.41129	lower
377	structural connectivity	Receptors	VAChT	mis	0.0230016	0.49458	-1.79387	29999	(0.01, 0.1, 0.1)	0	0	entorhinal	0	0	0.41129	lower
378	structural connectivity	Receptors	5HT1b	mis	0.0229373	0.494048	-1.78761	29999	(0.01, 0.1, 0.1)	0	0	entorhinal	0	0	0.41129	lower
379	structural connectivity	metabolism	cbf	mis	0.022875	0.49422	-1.78656	29999	(0.01, 0.1, 0.1)	0	0	entorhinal	0	0	0.41129	lower
380	structural connectivity	Receptors	GABAa	mis	0.022842	0.48239	-1.77816	29999	(0.01, 0.9, 0.1)	0	0	entorhinal	0	0	0.41129	lower
381	structural connectivity	Receptors	5HTT	mis	0.0225454	0.494167	-1.78807	29999	(0.01, 0.1, 0.1)	0	0	entorhinal	0	0	0.41129	lower
382	structural connectivity	Cortical expansion	scaling	clear	0.0224312	0.482061	-1.88897	29999	(0.01, 0.1, 0.1)	0	0	entorhinal	0	0	0.41129	lower
383	structural connectivity	Cortical expansion	scalingnih	clear	0.0220677	0.484315	-1.90072	29999	(0.01, 0.1, 0.1)	0	0	entorhinal	0	0	0.41129	lower
384	structural connectivity	Celltype	OPC	clear	0.0214068	0.458603	-1.77624	29999	(0.01, 0.5, 0.1)	0	0	entorhinal	0	0	0.41129	lower
385	structural connectivity	Receptors	MOR	clear	0.0208057	0.487007	-1.78899	29999	(0.01, 0.1, 0.1)	0	0	entorhinal	0	0	0.41129	lower
386	structural connectivity	Celltype	Endo	mis	0.0196158	0.411389	-1.82262	29999	(0.01, 1.9, 0.1)	0	0	entorhinal	0	0	0.41129	lower
387	structural connectivity	Receptors	5HT4	clear	0.0190215	0.490343	-1.7973	29999	(0.01, 0.1, 0.1)	0	0	entorhinal	0	0	0.41129	lower
388	structural connectivity	metabolism	cbv	mis	0.0183923	0.463115	-1.786	14855	(0.01, 1.9, 0.1)	0	0	entorhinal	0	0	0.41129	lower
389	structural connectivity	Receptors	DAT	mis	0.0179786	0.467969	-1.8601	23629	(0.01, 1.5, 0.1)	0	0	entorhinal	0	0	0.41129	lower
390	structural connectivity	Cortical expansion	scalinghcp	clear	0.0169594	0.488925	-1.89605	29999	(0.01, 0.1, 0.1)	0	0	entorhinal	0	0	0.41129	lower
391	structural connectivity	Receptors	5HT1a	clear	0.0118516	0.509548	-1.8455	29999	(0.01, 0.1, 0.1)	0	0	entorhinal	0	0	0.41129	lower
392	structural connectivity	Microstructure	thickness	clear	0.0114591	0.505769	-1.87195	29999	(0.01, 0.1, 0.1)	0	0	entorhinal	0	0	0.41129	lower
393	structural connectivity	AD-realted	MAPT	clear	0.0100323	0.505275	-1.86633	29999	(0.01, 0.1, 0.1)	0	0	entorhinal	0	0	0.41129	lower
394	structural connectivity	Receptors	MOR	syn	-0.00991177	0.495584	-1.95857	1539	(0.01, 1.5, 0.3)	0	0	entorhinal	0	0	0.41129	lower
1	functional connectivity	AD-realted	MAPT	syn	0.791723	0.109894	0.621974	246	(0.7, 2, 0.1)	1	0	precuneus	1	1	0.410132	higher
2	functional connectivity	Receptors	5HT4	spread	0.748243	0.100595	0.502537	296	(0.01, 0.9, 1)	1	0	precuneus	1	1	0.410132	higher
3	functional connectivity	AD-realted	MAPT	mis	0.747643	0.132001	0.555432	234	(0.9, 3, 0.3)	0	0	precuneus	1	0	0.410132	higher
4	functional connectivity	AD-realted	Abeta	mis	0.745201	0.10603	0.530556	288	(0.5, 3, 0.3)	1	0	precuneus	1	1	0.410132	higher
5	functional connectivity	AD-realted	MAPT	spread	0.743773	0.100173	0.43666	174	(0.01, 1, 1)	0	0	precuneus	1	0	0.410132	higher
6	functional connectivity	AD-realted	Abeta	spread	0.735955	0.104887	0.333762	133	(0.9, 3, 1)	0	0	precuneus	1	0	0.410132	higher
7	functional connectivity	Receptors	5HT4	spread	0.725935	0.0737188	0.469367	421	(0.9, 2, 1)	1	0	entorhinal	0	1	0.419391	higher
8	functional connectivity	AD-realted	MAPT	spread	0.723247	0.0935152	0.512523	1601	(0.9, 3, 0.1)	1	0	entorhinal	0	0	0.419391	higher
9	functional connectivity	Receptors	MOR	spread	0.723219	0.0801596	0.401855	369	(0.9, 1.5, 0.5)	1	0	precuneus	1	1	0.410132	higher
10	functional connectivity	Cortical expansion	evoexp	spread	0.713213	0.105971	0.395552	470	(0.9, 1.5, 0.1)	1	0	precuneus	1	1	0.410132	higher
11	functional connectivity	AD-realted	Abeta	mis	0.713008	0.115385	0.318641	1927	(0.01, 1.5, 0.1)	1	0	entorhinal	0	1	0.419391	higher
12	functional connectivity	AD-realted	Abeta	syn	0.707877	0.121729	0.37021	118	(0.7, 3, 0.3)	0	0	precuneus	1	0	0.410132	higher
13	functional connectivity	AD-realted	Abeta	syn	0.696915	0.127525	0.438529	122	(0.7, 3, 0.5)	0	0	entorhinal	0	0	0.419391	higher
14	functional connectivity	AD-realted	MAPT	mis	0.69047	0.12167	0.469997	29999	(0.9, 1.5, 0.1)	0	0	entorhinal	0	0	0.419391	higher
15	functional connectivity	Receptors	5HT4	mis	0.684327	0.142435	0.433691	379	(0.7, 3, 0.1)	0	0	precuneus	1	0	0.410132	higher
16	functional connectivity	Receptors	MOR	spread	0.679987	0.0975047	0.382648	328	(0.9, 2, 0.7)	1	0	entorhinal	0	1	0.419391	higher
17	functional connectivity	AD-realted	Abeta	spread	0.679977	0.137088	0.331316	29999	(0.3, 0.5, 0.1)	0	0	entorhinal	0	0	0.419391	higher
18	functional connectivity	Microstructure	thickness	spread	0.679093	0.0993929	0.329833	333	(0.9, 1.5, 1)	1	0	precuneus	1	1	0.410132	higher
19	functional connectivity	Cortical expansion	scalinghcp	syn	0.671264	0.126692	0.401385	310	(0.9, 1.5, 0.1)	1	0	precuneus	1	1	0.410132	higher
20	functional connectivity	Receptors	5HT4	syn	0.667309	0.180206	0.409796	250	(0.9, 1.5, 0.1)	0	0	precuneus	1	0	0.410132	higher
21	functional connectivity	Cortical expansion	evoexp	mis	0.665497	0.21921	0.361435	100	(0.9, 3, 0.1)	0	0	precuneus	1	0	0.410132	higher
22	functional connectivity	Receptors	5HT1a	spread	0.664754	0.0933382	0.347357	312	(0.9, 1.9, 1)	1	0	entorhinal	1	1	0.419391	higher
23	functional connectivity	Cortical expansion	scaling	syn	0.664176	0.163026	0.376708	265	(0.9, 1.5, 0.1)	1	0	precuneus	1	1	0.410132	higher
24	functional connectivity	Cortical expansion	devexp	spread	0.66364	0.11878	0.362897	1323	(0.9, 1, 0.1)	1	0	precuneus	1	1	0.410132	higher
25	functional connectivity	Receptors	mGluR5	spread	0.656406	0.099248	0.304017	259	(0.9, 2, 0.5)	1	0	entorhinal	1	1	0.419391	higher
26	functional connectivity	Receptors	CB1	spread	0.654249	0.11791	0.220829	310	(0.9, 1.5, 1)	1	0	precuneus	1	1	0.410132	higher
27	functional connectivity	Cortical expansion	evoexp	syn	0.650799	0.230549	0.327113	96	(0.9, 1.9, 0.1)	0	0	precuneus	1	0	0.410132	higher
28	functional connectivity	Receptors	5HT1a	spread	0.65062	0.145685	0.191809	218	(0.5, 1, 1)	1	0	precuneus	0	1	0.410132	higher
29	functional connectivity	Cortical expansion	scaling	syn	0.648603	0.173033	0.395812	137	(0.9, 3, 0.1)	1	0	entorhinal	0	1	0.419391	higher
30	functional connectivity	Cortical expansion	scalinghcp	syn	0.64687	0.128712	0.376181	112	(0.9, 3, 1)	1	0	entorhinal	0	1	0.419391	higher
31	functional connectivity	AD-realted	MAPT	syn	0.646731	0.0953313	0.321008	437	(0.7, 1.5, 0.1)	0	0	entorhinal	0	1	0.419391	higher
32	functional connectivity	Receptors	5HT4	syn	0.64629	0.126207	0.371044	180	(0.7, 3, 0.1)	0	0	entorhinal	0	0	0.419391	higher
33	functional connectivity	Cortical expansion	devexp	spread	0.643483	0.0945059	0.296248	293	(0.9, 2, 0.3)	1	0	entorhinal	0	1	0.419391	higher
34	functional connectivity	Cortical expansion	scalinghcp	mis	0.642259	0.150626	0.362374	352	(0.9, 2.5, 0.1)	0	0	precuneus	1	0	0.410132	higher
35	functional connectivity	Cortical expansion	scaling	mis	0.642248	0.172559	0.379523	280	(0.9, 3, 0.1)	0	0	entorhinal	1	0	0.419391	higher
36	functional connectivity	metabolism	cbf	clear	0.642182	0.249313	0.0558015	48	(0.01, 3, 0.3)	1	0	precuneus	1	1	0.410132	higher
37	functional connectivity	Cortical expansion	scalingnih	syn	0.64171	0.182135	0.349453	672	(0.9, 0.9, 0.1)	1	0	precuneus	1	1	0.410132	higher
38	functional connectivity	Cortical expansion	scaling	mis	0.640763	0.159862	0.386659	706	(0.9, 1.5, 1)	0	0	precuneus	0	0	0.410132	higher
39	functional connectivity	Cortical expansion	scalingpnc	syn	0.637209	0.162767	0.261123	182	(0.5, 3, 0.1)	1	0	precuneus	1	1	0.410132	higher
40	functional connectivity	Cortical expansion	scalinghcp	mis	0.635358	0.155321	0.377911	304	(0.9, 3, 0.1)	0	0	entorhinal	0	0	0.419391	higher
41	functional connectivity	Receptors	D1	spread	0.630799	0.0959601	0.266941	268	(0.9, 2, 1)	1	0	entorhinal	1	1	0.419391	higher
42	functional connectivity	Receptors	5HT4	mis	0.626483	0.166868	0.349766	234	(0.9, 3, 0.3)	0	0	entorhinal	0	0	0.419391	higher
43	functional connectivity	Cortical expansion	scalingpnc	syn	0.62341	0.182188	0.33249	115	(0.9, 3, 0.3)	1	0	entorhinal	0	1	0.419391	higher
44	functional connectivity	Cortical expansion	scalingpnc	spread	0.6192	0.137249	0.141879	340	(0.9, 1.5, 0.5)	0	0	precuneus	1	0	0.410132	higher
45	functional connectivity	Microstructure	thickness	spread	0.619198	0.10827	0.29538	261	(0.9, 2, 1)	1	0	entorhinal	0	1	0.419391	higher
46	functional connectivity	Cortical expansion	scaling	spread	0.618472	0.150553	0.254015	910	(0.9, 1, 0.3)	0	0	precuneus	1	0	0.410132	higher
47	functional connectivity	Cortical expansion	evoexp	spread	0.618065	0.103558	0.269531	305	(0.9, 2, 0.3)	1	0	entorhinal	0	1	0.419391	higher
48	functional connectivity	Cortical expansion	scalingpnc	mis	0.616344	0.175919	0.228889	201	(0.7, 3, 0.3)	0	0	precuneus	1	0	0.410132	higher
49	functional connectivity	Cortical expansion	scalingnih	syn	0.614652	0.188363	0.305838	109	(0.9, 3, 0.5)	1	0	entorhinal	0	1	0.419391	higher
50	functional connectivity	Cortical expansion	scalinghcp	spread	0.613203	0.142951	0.119571	2134	(0.01, 1, 0.1)	0	0	precuneus	1	0	0.410132	higher
51	functional connectivity	Receptors	D2	spread	0.61136	0.196305	0.224883	326	(0.7, 0.9, 0.7)	1	0	precuneus	1	1	0.410132	higher
52	functional connectivity	Receptors	D2	spread	0.61099	0.188746	0.232297	854	(0.9, 0.9, 1)	1	0	entorhinal	0	1	0.419391	higher
53	functional connectivity	Receptors	CB1	spread	0.606991	0.129594	0.252955	224	(0.9, 2, 1)	1	0	entorhinal	0	1	0.419391	higher
54	functional connectivity	metabolism	cbf	clear	0.602545	0.101887	0.196279	215	(0.3, 2.5, 0.5)	1	0	entorhinal	0	1	0.419391	higher
55	functional connectivity	Cortical expansion	scalingnih	mis	0.601441	0.196996	0.249651	611	(0.9, 1.5, 1)	0	0	precuneus	1	0	0.410132	higher
56	functional connectivity	Receptors	5HT2a	spread	0.599174	0.133102	0.0567385	339	(0.9, 1.5, 0.5)	1	0	precuneus	1	1	0.410132	higher
57	functional connectivity	Cortical expansion	scalingpnc	mis	0.596608	0.166641	0.26463	542	(0.5, 1.5, 1)	0	0	entorhinal	0	0	0.419391	higher
58	functional connectivity	Cortical expansion	scalingnih	spread	0.59419	0.166176	0.195364	885	(0.9, 1, 0.3)	0	0	precuneus	1	0	0.410132	higher
59	functional connectivity	Cortical expansion	scalingnih	mis	0.590232	0.202562	0.239628	268	(0.9, 3, 0.1)	0	0	entorhinal	0	0	0.419391	higher
60	functional connectivity	Receptors	5HTT	clear	0.587977	0.16495	0.294351	55	(0.7, 3, 1)	1	0	precuneus	1	1	0.410132	higher
61	functional connectivity	Celltype	OPC	spread	0.586888	0.17949	-0.0102203	451	(0.9, 0.9, 1)	1	0	precuneus	1	1	0.410132	higher
62	functional connectivity	Celltype	Endo	clear	0.582491	0.120133	0.232618	29999	(0.7, 0.5, 1)	1	0	precuneus	1	1	0.410132	higher
63	functional connectivity	Receptors	mGluR5	spread	0.580009	0.136129	-0.188673	126	(0.9, 3, 1)	1	0	precuneus	0	1	0.410132	higher
64	functional connectivity	Cortical expansion	scalingpnc	spread	0.575741	0.13945	0.216413	255	(0.9, 2, 0.3)	0	0	entorhinal	0	0	0.419391	higher
65	functional connectivity	metabolism	cbv	clear	0.574964	0.152986	0.00236687	57	(0.01, 1, 1)	1	0	precuneus	1	1	0.410132	higher
66	functional connectivity	Cortical expansion	devexp	syn	0.572767	0.139809	0.232966	139	(0.9, 3, 0.3)	0	0	entorhinal	1	0	0.419391	higher
67	functional connectivity	Cortical expansion	scaling	spread	0.572488	0.155033	0.230812	248	(0.9, 2, 0.3)	0	0	entorhinal	0	0	0.419391	higher
68	functional connectivity	Cortical expansion	scalinghcp	spread	0.572189	0.152821	0.223992	251	(0.9, 2, 0.3)	0	0	entorhinal	0	0	0.419391	higher
69	functional connectivity	Celltype	Micro	spread	0.572009	0.187616	0.111075	679	(0.9, 0.9, 0.3)	1	0	precuneus	1	1	0.410132	higher
70	functional connectivity	metabolism	cmr02	clear	0.569955	0.185938	0.212937	29999	(0.5, 3, 1)	1	0	precuneus	1	1	0.410132	higher
71	functional connectivity	Receptors	D1	spread	0.567886	0.156911	0.0182703	2296	(0.9, 0.9, 0.1)	1	0	precuneus	0	1	0.410132	higher
72	functional connectivity	Receptors	DAT	spread	0.564792	0.111139	0.0689145	537	(0.9, 1.5, 0.1)	1	0	entorhinal	1	1	0.419391	higher
73	functional connectivity	Receptors	CB1	mis	0.56473	0.179158	-0.278121	66	(0.01, 2.5, 1)	0	0	precuneus	1	0	0.410132	higher
74	functional connectivity	Cortical expansion	scalingnih	spread	0.56215	0.171573	0.218547	257	(0.9, 1.9, 0.3)	0	0	entorhinal	0	0	0.419391	higher
75	functional connectivity	Receptors	5HT2a	syn	0.555519	0.254376	-0.0497313	227	(0.9, 0.9, 1)	0	0	precuneus	1	0	0.410132	higher
76	functional connectivity	Cortical expansion	devexp	mis	0.555377	0.210907	0.0552046	407	(0.9, 1, 1)	0	0	precuneus	1	0	0.410132	higher
77	functional connectivity	Receptors	CB1	syn	0.555257	0.124155	0.156601	105	(0.5, 3, 0.9)	0	0	precuneus	1	0	0.410132	higher
78	functional connectivity	Celltype	Neuro-Ex	syn	0.553299	0.296108	-0.338213	292	(0.7, 0.9, 0.1)	1	0	precuneus	1	1	0.410132	higher
79	functional connectivity	Celltype	Astro	spread	0.551855	0.157807	0.151513	858	(0.9, 1, 0.3)	1	0	precuneus	1	1	0.410132	higher
80	functional connectivity	Celltype	Neuro-In	syn	0.54551	0.27293	-0.372908	314	(0.7, 0.9, 0.1)	1	0	precuneus	1	1	0.410132	higher
81	functional connectivity	metabolism	cmrglc	clear	0.544776	0.193934	-0.0479965	36	(0.01, 2.5, 1)	1	0	precuneus	1	1	0.410132	higher
82	functional connectivity	Microstructure	thickness	syn	0.541437	0.133146	0.165538	151	(0.5, 3, 0.3)	0	0	entorhinal	1	0	0.419391	higher
83	functional connectivity	Celltype	Endo	syn	0.540516	0.174531	-0.578817	29999	(0.01, 0.5, 0.1)	0	0	precuneus	1	0	0.410132	higher
84	functional connectivity	Receptors	MOR	syn	0.539311	0.113733	-0.13091	105	(0.5, 3, 1)	0	0	precuneus	1	0	0.410132	higher
85	functional connectivity	Receptors	H3	spread	0.536163	0.129002	0.065703	292	(0.9, 1.9, 0.3)	1	0	entorhinal	1	1	0.419391	higher
86	functional connectivity	metabolism	cmr02	clear	0.535678	0.231236	-0.0760929	92	(0.01, 1.9, 1)	1	0	entorhinal	0	1	0.419391	higher
87	functional connectivity	Receptors	NMDA	clear	0.533713	0.247011	0.051035	71	(0.01, 0.9, 0.5)	1	0	precuneus	1	1	0.410132	higher
88	functional connectivity	Celltype	Neuro-Ex	mis	0.530781	0.330268	-0.388261	315	(0.9, 1, 1)	0	0	precuneus	1	0	0.410132	higher
89	functional connectivity	AD-realted	Cluster7	mis	0.52982	0.158587	-0.222952	401	(0.9, 1.5, 0.1)	0	0	precuneus	1	0	0.410132	higher
90	functional connectivity	AD-realted	Cluster6	syn	0.52982	0.158587	-0.222952	401	(0.9, 1.5, 0.1)	1	0	precuneus	1	1	0.410132	higher
91	functional connectivity	AD-realted	Cluster7	spread	0.52982	0.158587	-0.222952	401	(0.9, 1.5, 0.1)	0	0	precuneus	1	0	0.410132	higher
92	functional connectivity	AD-realted	Cluster7	syn	0.52982	0.158587	-0.222952	401	(0.9, 1.5, 0.1)	1	0	precuneus	1	1	0.410132	higher
93	functional connectivity	AD-realted	Cluster7	clear	0.52982	0.158587	-0.222952	401	(0.9, 1.5, 0.1)	0	0	precuneus	1	0	0.410132	higher
94	functional connectivity				0.52982	0.158587	-0.222952	401	(0.9, 1.5, 0.1)	0	1	precuneus	1	0	0.410132	higher
95	functional connectivity	AD-realted	Cluster3	clear	0.52982	0.158587	-0.222952	401	(0.9, 1.5, 0.1)	0	0	precuneus	1	0	0.410132	higher
96	functional connectivity	AD-realted	Cluster1	clear	0.52982	0.158587	-0.222952	401	(0.9, 1.5, 0.1)	0	0	precuneus	1	0	0.410132	higher
97	functional connectivity	AD-realted	Cluster6	spread	0.52982	0.158587	-0.222952	401	(0.9, 1.5, 0.1)	0	0	precuneus	1	0	0.410132	higher
98	functional connectivity	AD-realted	Cluster4	spread	0.52982	0.158587	-0.222952	401	(0.9, 1.5, 0.1)	0	0	precuneus	1	0	0.410132	higher
99	functional connectivity	AD-realted	Cluster3	mis	0.52982	0.158587	-0.222952	401	(0.9, 1.5, 0.1)	0	0	precuneus	1	0	0.410132	higher
100	functional connectivity	AD-realted	Cluster3	spread	0.52982	0.158587	-0.222952	401	(0.9, 1.5, 0.1)	0	0	precuneus	1	0	0.410132	higher
101	functional connectivity	AD-realted	Cluster2	spread	0.52982	0.158587	-0.222952	401	(0.9, 1.5, 0.1)	0	0	precuneus	1	0	0.410132	higher
102	functional connectivity	AD-realted	Cluster2	mis	0.52982	0.158587	-0.222952	401	(0.9, 1.5, 0.1)	0	0	precuneus	1	0	0.410132	higher
103	functional connectivity	AD-realted	Cluster4	clear	0.52982	0.158587	-0.222952	401	(0.9, 1.5, 0.1)	0	0	precuneus	1	0	0.410132	higher
104	functional connectivity	AD-realted	Cluster2	clear	0.52982	0.158587	-0.222952	401	(0.9, 1.5, 0.1)	0	0	precuneus	1	0	0.410132	higher
105	functional connectivity	AD-realted	Cluster4	mis	0.52982	0.158587	-0.222952	401	(0.9, 1.5, 0.1)	0	0	precuneus	1	0	0.410132	higher
106	functional connectivity	AD-realted	Cluster1	syn	0.52982	0.158587	-0.222952	401	(0.9, 1.5, 0.1)	1	0	precuneus	1	1	0.410132	higher
107	functional connectivity	AD-realted	Cluster4	syn	0.52982	0.158587	-0.222952	401	(0.9, 1.5, 0.1)	1	0	precuneus	1	1	0.410132	higher
108	functional connectivity	AD-realted	Cluster6	mis	0.52982	0.158587	-0.222952	401	(0.9, 1.5, 0.1)	0	0	precuneus	1	0	0.410132	higher
109	functional connectivity	AD-realted	Cluster1	spread	0.52982	0.158587	-0.222952	401	(0.9, 1.5, 0.1)	0	0	precuneus	1	0	0.410132	higher
110	functional connectivity	AD-realted	Cluster5	clear	0.52982	0.158587	-0.222952	401	(0.9, 1.5, 0.1)	0	0	precuneus	1	0	0.410132	higher
111	functional connectivity	AD-realted	Cluster1	mis	0.52982	0.158587	-0.222952	401	(0.9, 1.5, 0.1)	0	0	precuneus	1	0	0.410132	higher
112	functional connectivity	AD-realted	Cluster5	mis	0.52982	0.158587	-0.222952	401	(0.9, 1.5, 0.1)	0	0	precuneus	1	0	0.410132	higher
113	functional connectivity	AD-realted	Cluster2	syn	0.52982	0.158587	-0.222952	401	(0.9, 1.5, 0.1)	1	0	precuneus	1	1	0.410132	higher
114	functional connectivity	AD-realted	Cluster5	spread	0.52982	0.158587	-0.222952	401	(0.9, 1.5, 0.1)	0	0	precuneus	1	0	0.410132	higher
115	functional connectivity	AD-realted	Cluster5	syn	0.52982	0.158587	-0.222952	401	(0.9, 1.5, 0.1)	1	0	precuneus	1	1	0.410132	higher
116	functional connectivity	AD-realted	Cluster6	clear	0.52982	0.158587	-0.222952	401	(0.9, 1.5, 0.1)	0	0	precuneus	1	0	0.410132	higher
117	functional connectivity	AD-realted	Cluster3	syn	0.52982	0.158587	-0.222952	401	(0.9, 1.5, 0.1)	1	0	precuneus	1	1	0.410132	higher
118	functional connectivity				0.528887	0.119497	-0.00713661	245	(0.9, 2, 0.3)	0	1	entorhinal	0	0	0.419391	higher
119	functional connectivity	AD-realted	Cluster4	syn	0.528887	0.119497	-0.00713661	245	(0.9, 2, 0.3)	1	0	entorhinal	0	1	0.419391	higher
120	functional connectivity	AD-realted	Cluster2	mis	0.528887	0.119497	-0.00713661	245	(0.9, 2, 0.3)	0	0	entorhinal	0	0	0.419391	higher
121	functional connectivity	AD-realted	Cluster2	syn	0.528887	0.119497	-0.00713661	245	(0.9, 2, 0.3)	1	0	entorhinal	0	1	0.419391	higher
122	functional connectivity	AD-realted	Cluster3	clear	0.528887	0.119497	-0.00713661	245	(0.9, 2, 0.3)	0	0	entorhinal	0	0	0.419391	higher
123	functional connectivity	AD-realted	Cluster6	spread	0.528887	0.119497	-0.00713661	245	(0.9, 2, 0.3)	0	0	entorhinal	0	0	0.419391	higher
124	functional connectivity	AD-realted	Cluster6	mis	0.528887	0.119497	-0.00713661	245	(0.9, 2, 0.3)	0	0	entorhinal	0	0	0.419391	higher
125	functional connectivity	AD-realted	Cluster3	mis	0.528887	0.119497	-0.00713661	245	(0.9, 2, 0.3)	0	0	entorhinal	0	0	0.419391	higher
126	functional connectivity	AD-realted	Cluster3	spread	0.528887	0.119497	-0.00713661	245	(0.9, 2, 0.3)	0	0	entorhinal	0	0	0.419391	higher
127	functional connectivity	AD-realted	Cluster6	clear	0.528887	0.119497	-0.00713661	245	(0.9, 2, 0.3)	0	0	entorhinal	0	0	0.419391	higher
128	functional connectivity	AD-realted	Cluster3	syn	0.528887	0.119497	-0.00713661	245	(0.9, 2, 0.3)	1	0	entorhinal	0	1	0.419391	higher
129	functional connectivity	AD-realted	Cluster5	syn	0.528887	0.119497	-0.00713661	245	(0.9, 2, 0.3)	1	0	entorhinal	0	1	0.419391	higher
130	functional connectivity	AD-realted	Cluster4	clear	0.528887	0.119497	-0.00713661	245	(0.9, 2, 0.3)	0	0	entorhinal	0	0	0.419391	higher
131	functional connectivity	AD-realted	Cluster5	spread	0.528887	0.119497	-0.00713661	245	(0.9, 2, 0.3)	0	0	entorhinal	0	0	0.419391	higher
132	functional connectivity	AD-realted	Cluster5	mis	0.528887	0.119497	-0.00713661	245	(0.9, 2, 0.3)	0	0	entorhinal	0	0	0.419391	higher
133	functional connectivity	AD-realted	Cluster5	clear	0.528887	0.119497	-0.00713661	245	(0.9, 2, 0.3)	0	0	entorhinal	0	0	0.419391	higher
134	functional connectivity	AD-realted	Cluster4	mis	0.528887	0.119497	-0.00713661	245	(0.9, 2, 0.3)	0	0	entorhinal	0	0	0.419391	higher
135	functional connectivity	AD-realted	Cluster4	spread	0.528887	0.119497	-0.00713661	245	(0.9, 2, 0.3)	0	0	entorhinal	0	0	0.419391	higher
136	functional connectivity	AD-realted	Cluster2	spread	0.528887	0.119497	-0.00713661	245	(0.9, 2, 0.3)	0	0	entorhinal	0	0	0.419391	higher
137	functional connectivity	AD-realted	Cluster7	syn	0.528887	0.119497	-0.00713661	245	(0.9, 2, 0.3)	1	0	entorhinal	0	1	0.419391	higher
138	functional connectivity	AD-realted	Cluster1	syn	0.528887	0.119497	-0.00713661	245	(0.9, 2, 0.3)	1	0	entorhinal	0	1	0.419391	higher
139	functional connectivity	AD-realted	Cluster6	syn	0.528887	0.119497	-0.00713661	245	(0.9, 2, 0.3)	1	0	entorhinal	0	1	0.419391	higher
140	functional connectivity	AD-realted	Cluster1	mis	0.528887	0.119497	-0.00713661	245	(0.9, 2, 0.3)	0	0	entorhinal	0	0	0.419391	higher
141	functional connectivity	AD-realted	Cluster7	clear	0.528887	0.119497	-0.00713661	245	(0.9, 2, 0.3)	0	0	entorhinal	0	0	0.419391	higher
142	functional connectivity	AD-realted	Cluster1	clear	0.528887	0.119497	-0.00713661	245	(0.9, 2, 0.3)	0	0	entorhinal	0	0	0.419391	higher
143	functional connectivity	AD-realted	Cluster7	spread	0.528887	0.119497	-0.00713661	245	(0.9, 2, 0.3)	0	0	entorhinal	0	0	0.419391	higher
144	functional connectivity	AD-realted	Cluster2	clear	0.528887	0.119497	-0.00713661	245	(0.9, 2, 0.3)	0	0	entorhinal	0	0	0.419391	higher
145	functional connectivity	AD-realted	Cluster1	spread	0.528887	0.119497	-0.00713661	245	(0.9, 2, 0.3)	0	0	entorhinal	0	0	0.419391	higher
146	functional connectivity	AD-realted	Cluster7	mis	0.528887	0.119497	-0.00713661	245	(0.9, 2, 0.3)	0	0	entorhinal	0	0	0.419391	higher
147	functional connectivity	Celltype	Endo	clear	0.527307	0.110116	-0.0867546	106	(0.01, 3, 1)	1	0	entorhinal	0	1	0.419391	higher
148	functional connectivity	Receptors	D2	syn	0.527172	0.271213	-0.118828	77	(0.5, 3, 0.5)	0	0	precuneus	1	0	0.410132	higher
149	functional connectivity	Microstructure	thickness	syn	0.526125	0.17119	0.168318	133	(0.7, 3, 0.3)	0	0	precuneus	0	0	0.410132	higher
150	functional connectivity	Receptors	mGluR5	syn	0.525248	0.150106	-0.433242	90	(0.3, 3, 1)	0	0	precuneus	1	0	0.410132	higher
151	functional connectivity	Receptors	NET	clear	0.5246	0.279272	-0.0798781	170	(0.5, 0.9, 0.1)	1	0	precuneus	1	1	0.410132	higher
152	functional connectivity	Receptors	M1	spread	0.52405	0.199667	0.00990178	246	(0.9, 1.9, 0.3)	1	0	entorhinal	1	1	0.419391	higher
153	functional connectivity	Receptors	5HT6	spread	0.520884	0.197105	0.023027	385	(0.9, 1, 1)	1	0	entorhinal	1	1	0.419391	higher
154	functional connectivity	Receptors	NET	clear	0.520091	0.142126	0.0528419	109	(0.3, 3, 0.5)	1	0	entorhinal	0	1	0.419391	higher
155	functional connectivity	Celltype	Neuro-In	spread	0.519688	0.284339	-0.359996	1196	(0.9, 0.9, 0.1)	0	0	precuneus	1	0	0.410132	higher
156	functional connectivity	Cortical expansion	evoexp	syn	0.519153	0.207541	0.12465	178	(0.9, 1.5, 1)	0	0	entorhinal	0	0	0.419391	higher
157	functional connectivity	Celltype	Endo	spread	0.518505	0.334308	-0.266791	397	(0.05, 2.9, 0.1)	0	0	precuneus	1	0	0.410132	higher
158	functional connectivity	Receptors	NMDA	spread	0.518402	0.149482	0.0522454	479	(0.9, 1.5, 0.1)	1	0	entorhinal	1	0	0.419391	higher
159	functional connectivity	Receptors	5HT2a	mis	0.51799	0.252027	-0.0484585	423	(0.9, 1.9, 0.1)	0	0	precuneus	1	0	0.410132	higher
160	functional connectivity	Celltype	Neuro-Ex	spread	0.517959	0.26693	-0.243485	960	(0.9, 0.9, 0.1)	0	0	precuneus	1	0	0.410132	higher
161	functional connectivity	Cortical expansion	devexp	syn	0.51725	0.199381	-0.148639	3880	(0.9, 0.5, 1)	0	0	precuneus	0	0	0.410132	higher
162	functional connectivity	Celltype	OPC	spread	0.516893	0.128388	-0.0319225	319	(0.9, 1.9, 0.3)	1	0	entorhinal	0	1	0.419391	higher
163	functional connectivity	Celltype	Astro	clear	0.515172	0.301242	-0.212301	73	(0.01, 1.5, 0.5)	1	0	entorhinal	1	0	0.419391	higher
164	functional connectivity	Receptors	DAT	spread	0.515121	0.184045	-0.293372	2015	(0.9, 0.9, 0.1)	1	0	precuneus	0	1	0.410132	higher
165	functional connectivity	metabolism	cbf	syn	0.513803	0.19464	-0.60824	29999	(0.01, 0.5, 0.1)	0	0	precuneus	1	0	0.410132	higher
166	functional connectivity	Receptors	GABAa	spread	0.512731	0.136947	0.0616481	29999	(0.9, 1.5, 1)	1	0	precuneus	1	1	0.410132	higher
167	functional connectivity	Receptors	D1	syn	0.510964	0.209978	-0.163043	62	(0.3, 3, 1)	0	0	entorhinal	1	0	0.419391	higher
168	functional connectivity	Cortical expansion	devexp	mis	0.510399	0.232202	0.0574258	250	(0.9, 3, 0.1)	0	0	entorhinal	0	0	0.419391	higher
169	functional connectivity	Receptors	5HT1a	syn	0.508055	0.146299	0.0574423	166	(0.5, 3, 0.3)	0	0	precuneus	1	0	0.410132	higher
170	functional connectivity	Receptors	VAChT	spread	0.506661	0.139584	-0.0459985	487	(0.9, 1.9, 0.1)	1	0	entorhinal	1	1	0.419391	higher
171	functional connectivity	Receptors	MOR	syn	0.502974	0.220483	-0.0691808	74	(0.5, 2, 1)	0	0	entorhinal	0	0	0.419391	higher
172	functional connectivity	Cortical expansion	evoexp	mis	0.502921	0.247475	0.140178	283	(0.9, 2.5, 0.1)	0	0	entorhinal	0	0	0.419391	higher
173	functional connectivity	Receptors	5HT2a	mis	0.502834	0.261256	-0.0173367	243	(0.9, 3, 0.1)	1	0	entorhinal	0	0	0.419391	higher
174	functional connectivity	Receptors	5HTT	clear	0.502553	0.185544	0.185566	105	(0.9, 3, 0.1)	1	0	entorhinal	0	1	0.419391	higher
175	functional connectivity	Receptors	5HT2a	syn	0.50202	0.281053	0.0153761	116	(0.9, 3, 0.1)	0	0	entorhinal	0	0	0.419391	higher
176	functional connectivity	Celltype	Neuro-In	mis	0.500879	0.332019	-0.49887	1170	(0.9, 0.9, 0.1)	0	0	precuneus	1	0	0.410132	higher
177	functional connectivity	Receptors	5HT1a	mis	0.499563	0.158134	0.12288	29999	(0.7, 3, 0.1)	0	0	entorhinal	1	0	0.419391	higher
178	functional connectivity	Receptors	5HT1a	mis	0.499377	0.158118	0.122377	29999	(0.7, 3, 0.1)	0	0	precuneus	0	0	0.410132	higher
179	functional connectivity	Celltype	Astro	spread	0.49451	0.125943	-0.11116	293	(0.9, 1.9, 0.5)	0	0	entorhinal	0	1	0.419391	higher
180	functional connectivity	Receptors	5HT2a	spread	0.493883	0.259212	-0.146076	29999	(0.7, 0.1, 0.1)	0	0	entorhinal	0	1	0.419391	higher
181	functional connectivity	Receptors	mGluR5	mis	0.491016	0.197163	-1.1088	160	(0.01, 1.5, 1)	0	0	precuneus	1	0	0.410132	higher
182	functional connectivity	Receptors	mGluR5	syn	0.490267	0.175915	-0.137643	110	(0.1, 3, 1)	0	0	entorhinal	0	0	0.419391	higher
183	functional connectivity	Celltype	Oligo	spread	0.487322	0.293442	-0.21277	400	(0.1, 2.9, 0.1)	1	0	precuneus	1	1	0.410132	higher
184	functional connectivity	Microstructure	myelinmap	clear	0.485951	0.276003	-0.0917011	47	(0.1, 3, 1)	1	0	entorhinal	1	1	0.419391	higher
185	functional connectivity	Receptors	D2	syn	0.485653	0.137817	-0.0711249	120	(0.5, 3, 0.7)	0	0	entorhinal	0	0	0.419391	higher
186	functional connectivity	Receptors	H3	spread	0.485069	0.157518	-0.374327	262	(0.7, 2.5, 0.1)	1	0	precuneus	0	1	0.410132	higher
187	functional connectivity	Celltype	Neuro-In	spread	0.483855	0.133051	-0.0320699	382	(0.9, 1.9, 0.1)	1	0	entorhinal	0	0	0.419391	higher
188	functional connectivity	Celltype	OPC	mis	0.481874	0.271021	-0.230373	75	(0.7, 2.9, 0.3)	0	0	precuneus	1	0	0.410132	higher
189	functional connectivity	Celltype	Neuro-In	syn	0.481753	0.256087	-1.21943	75	(0.01, 2, 1)	0	0	entorhinal	0	1	0.419391	higher
190	functional connectivity	AD-realted	APOE	clear	0.479872	0.185952	0.0800218	29999	(0.3, 3, 1)	1	0	entorhinal	1	1	0.419391	higher
191	functional connectivity	Microstructure	genepc1	spread	0.479841	0.321027	-0.568559	354	(0.1, 2.9, 0.1)	1	0	precuneus	1	1	0.410132	higher
192	functional connectivity	AD-realted	APOE	clear	0.479671	0.185974	0.0797422	29999	(0.3, 3, 1)	1	0	precuneus	0	1	0.410132	higher
193	functional connectivity	Receptors	A4B2	spread	0.479158	0.142301	-0.543914	126	(0.9, 3, 1)	1	0	precuneus	1	1	0.410132	higher
194	functional connectivity	Receptors	NET	syn	0.478923	0.15627	-0.612533	29999	(0.01, 0.5, 1)	0	0	precuneus	1	0	0.410132	higher
195	functional connectivity	Celltype	OPC	syn	0.478763	0.261181	-0.250698	85	(0.7, 2, 0.3)	0	0	precuneus	1	0	0.410132	higher
196	functional connectivity	Celltype	Neuro-Ex	syn	0.477916	0.260425	-1.20164	75	(0.05, 1.9, 1)	1	0	entorhinal	0	1	0.419391	higher
197	functional connectivity	Receptors	5HTT	syn	0.475321	0.24511	-0.834255	16415	(0.01, 0.5, 0.1)	0	0	precuneus	1	0	0.410132	higher
198	functional connectivity	Receptors	M1	syn	0.475237	0.206202	-0.500801	627	(0.01, 2, 0.1)	1	0	precuneus	1	0	0.410132	higher
199	functional connectivity	Receptors	M1	syn	0.474857	0.290057	-0.293234	137	(0.7, 1.9, 0.7)	0	0	entorhinal	0	0	0.419391	higher
200	functional connectivity	Celltype	Neuro-Ex	spread	0.474555	0.137368	-0.0364098	377	(0.9, 1.9, 0.1)	0	0	entorhinal	0	0	0.419391	higher
201	functional connectivity	Receptors	mGluR5	mis	0.47382	0.253455	-1.19541	895	(0.01, 2, 0.1)	0	0	entorhinal	0	0	0.419391	higher
202	functional connectivity	Celltype	Micro	spread	0.473102	0.131843	-0.110428	286	(0.9, 2, 0.3)	1	0	entorhinal	0	1	0.419391	higher
203	functional connectivity	Celltype	Oligo	spread	0.472777	0.135839	-0.186954	492	(0.9, 1.9, 0.1)	1	0	entorhinal	0	1	0.419391	higher
204	functional connectivity	Celltype	Micro	syn	0.472449	0.250933	-0.643673	73	(0.3, 2.9, 0.3)	0	0	precuneus	1	0	0.410132	higher
205	functional connectivity	Receptors	5HTT	spread	0.471706	0.186894	-0.132353	464	(0.9, 1.5, 0.1)	0	0	entorhinal	1	0	0.419391	higher
206	functional connectivity	Receptors	D1	syn	0.469532	0.163381	-0.574001	107	(0.3, 3, 0.7)	0	0	precuneus	0	0	0.410132	higher
207	functional connectivity	Receptors	5HTT	spread	0.468604	0.312989	-0.394686	514	(0.3, 2, 0.1)	0	0	precuneus	0	0	0.410132	higher
208	functional connectivity	metabolism	cmr02	spread	0.46808	0.326	-0.445059	320	(0.1, 3, 0.1)	0	0	precuneus	1	0	0.410132	higher
209	functional connectivity	Microstructure	myelinmap	spread	0.467783	0.321984	-0.560355	354	(0.1, 2.9, 0.1)	1	0	precuneus	1	0	0.410132	higher
210	functional connectivity	Receptors	D2	mis	0.46658	0.315115	-0.227933	137	(0.9, 1.5, 1)	0	0	precuneus	1	0	0.410132	higher
211	functional connectivity	Celltype	OPC	clear	0.465979	0.306805	-0.352052	67	(0.5, 1, 1)	0	0	entorhinal	1	0	0.419391	higher
212	functional connectivity	Receptors	VAChT	spread	0.464385	0.247059	-0.0929302	401	(0.1, 3, 0.1)	1	0	precuneus	0	1	0.410132	higher
213	functional connectivity	Celltype	Oligo	syn	0.464372	0.199477	-0.658529	346	(0.01, 1.9, 0.1)	0	0	precuneus	1	0	0.410132	higher
214	functional connectivity	Celltype	Micro	mis	0.462507	0.25521	-0.599546	43	(0.3, 3, 1)	0	0	precuneus	1	0	0.410132	higher
215	functional connectivity	Receptors	5HT1b	spread	0.462398	0.143858	-0.119086	341	(0.9, 1.9, 0.1)	1	0	entorhinal	1	1	0.419391	higher
216	functional connectivity	Celltype	Oligo	syn	0.462293	0.175315	-0.583557	81	(0.1, 1.9, 1)	0	0	entorhinal	0	0	0.419391	higher
217	functional connectivity	Receptors	5HT1a	syn	0.462019	0.125252	-0.222857	185	(0.5, 3, 0.3)	0	0	entorhinal	0	0	0.419391	higher
218	functional connectivity	metabolism	cmr02	syn	0.461397	0.140011	-0.806039	508	(0.01, 0.5, 0.9)	0	0	precuneus	1	0	0.410132	higher
219	functional connectivity	metabolism	cmrglc	spread	0.458079	0.309375	-0.304188	348	(0.1, 3, 0.1)	0	0	precuneus	1	0	0.410132	higher
220	functional connectivity	Receptors	CB1	syn	0.452748	0.238576	-0.315829	81	(0.7, 1.9, 1)	0	0	entorhinal	0	0	0.419391	higher
221	functional connectivity	AD-realted	APOE	spread	0.450753	0.135413	-0.174939	345	(0.9, 2, 0.1)	0	0	entorhinal	1	0	0.419391	higher
222	functional connectivity	Receptors	5HT1b	spread	0.450702	0.283098	-0.232311	357	(0.3, 2.5, 0.1)	1	0	precuneus	0	1	0.410132	higher
223	functional connectivity	Receptors	DAT	clear	0.450048	0.214743	-0.653319	68	(0.01, 0.5, 1)	0	0	precuneus	1	0	0.410132	higher
224	functional connectivity	metabolism	cbv	clear	0.44984	0.323617	-1.08317	100	(0.01, 1, 1)	1	0	entorhinal	0	1	0.419391	higher
225	functional connectivity	Receptors	5HT1b	clear	0.449296	0.194279	-0.115775	1076	(0.3, 3, 0.1)	0	0	precuneus	1	0	0.410132	higher
226	functional connectivity	Receptors	NMDA	syn	0.447612	0.205499	-0.802328	1893	(0.01, 0.5, 0.1)	0	0	precuneus	1	0	0.410132	higher
227	functional connectivity	Receptors	M1	mis	0.444724	0.311083	-0.388795	129	(0.7, 2.5, 1)	0	0	entorhinal	1	0	0.419391	higher
228	functional connectivity	metabolism	cmrglc	syn	0.44373	0.322611	-0.8319	84	(0.3, 3, 1)	1	0	entorhinal	1	0	0.419391	higher
229	functional connectivity	Receptors	GABAa	syn	0.443324	0.223714	-0.69351	248	(0.01, 0.5, 1)	0	0	precuneus	1	0	0.410132	higher
230	functional connectivity	Receptors	5HT1b	clear	0.443137	0.161887	-0.147722	759	(0.1, 3, 0.1)	0	0	entorhinal	0	0	0.419391	higher
231	functional connectivity	metabolism	cmrglc	mis	0.440428	0.337392	-0.723458	128	(0.5, 3, 0.5)	0	0	entorhinal	1	0	0.419391	higher
232	functional connectivity	Celltype	Endo	syn	0.440149	0.194938	-0.415246	55	(0.01, 2.5, 1)	0	0	entorhinal	0	0	0.419391	higher
233	functional connectivity	metabolism	cmrglc	spread	0.44009	0.163566	-0.190848	305	(0.9, 2, 0.1)	0	0	entorhinal	0	0	0.419391	higher
234	functional connectivity	metabolism	cbf	spread	0.439141	0.30254	-0.232876	338	(0.1, 3, 0.1)	0	0	precuneus	1	0	0.410132	higher
235	functional connectivity	Receptors	VAChT	syn	0.438177	0.202226	-0.886015	255	(0.01, 0.5, 1)	0	0	precuneus	1	0	0.410132	higher
236	functional connectivity	Receptors	VAChT	clear	0.437939	0.338303	-0.489758	31	(0.7, 3, 0.7)	0	0	precuneus	1	0	0.410132	higher
237	functional connectivity	Receptors	NMDA	spread	0.43572	0.134619	-0.405386	284	(0.7, 2.5, 0.1)	0	0	precuneus	0	0	0.410132	higher
238	functional connectivity	Receptors	M1	spread	0.435172	0.197247	-0.661378	160	(0.9, 3, 0.1)	0	0	precuneus	0	1	0.410132	higher
239	functional connectivity	Microstructure	genepc1	syn	0.434819	0.130745	-1.22664	29999	(0.01, 0.5, 1)	0	0	precuneus	1	0	0.410132	higher
240	functional connectivity	Receptors	GABAa	spread	0.433179	0.297315	-0.400023	8300	(0.9, 0.1, 1)	1	0	entorhinal	0	1	0.419391	higher
241	functional connectivity	Receptors	NET	spread	0.433144	0.154888	-0.0955619	29999	(0.9, 3, 1)	0	0	precuneus	1	0	0.410132	higher
242	functional connectivity	Microstructure	thickness	mis	0.431698	0.33007	-0.62496	156	(0.9, 1.5, 1)	0	0	precuneus	1	0	0.410132	higher
243	functional connectivity	Celltype	Neuro-Ex	mis	0.431027	0.307087	-0.859715	773	(0.01, 2.5, 0.1)	0	0	entorhinal	0	0	0.419391	higher
244	functional connectivity	Receptors	MOR	mis	0.430384	0.187276	-0.0276227	29999	(0.5, 3, 1)	0	0	precuneus	1	0	0.410132	higher
245	functional connectivity	Receptors	MOR	mis	0.43037	0.187306	-0.0275822	29999	(0.5, 3, 1)	0	0	entorhinal	0	0	0.419391	higher
246	functional connectivity	Receptors	5HT6	spread	0.429893	0.152547	-0.67102	172	(0.9, 3, 0.1)	1	0	precuneus	0	1	0.410132	higher
247	functional connectivity	AD-realted	APOE	spread	0.42519	0.201774	-0.0901826	29999	(0.9, 3, 1)	0	0	precuneus	0	0	0.410132	higher
248	functional connectivity	metabolism	cbv	spread	0.424987	0.21044	-0.0561685	247	(0.9, 1.9, 0.3)	0	0	entorhinal	1	0	0.419391	higher
249	functional connectivity	Receptors	H3	syn	0.424282	0.220126	-0.837203	183	(0.01, 0.5, 1)	0	0	precuneus	1	0	0.410132	higher
250	functional connectivity	Microstructure	genepc1	spread	0.424042	0.155655	-0.218706	367	(0.9, 2, 0.1)	1	0	entorhinal	0	1	0.419391	higher
251	functional connectivity	metabolism	cmr02	spread	0.422526	0.189977	-0.20021	309	(0.9, 1.9, 0.1)	0	0	entorhinal	0	0	0.419391	higher
252	functional connectivity	Receptors	5HT1b	syn	0.422365	0.197933	-0.620921	376	(0.01, 0.5, 1)	0	0	precuneus	1	0	0.410132	higher
253	functional connectivity	Celltype	Micro	syn	0.422028	0.223881	-0.477206	59	(0.3, 2.5, 1)	0	0	entorhinal	0	0	0.419391	higher
254	functional connectivity	Receptors	DAT	syn	0.420989	0.213465	-0.507617	65	(0.1, 2.9, 0.9)	0	0	entorhinal	1	0	0.419391	higher
255	functional connectivity	Microstructure	thickness	mis	0.418177	0.19649	0.0298069	29999	(0.7, 2, 1)	0	0	entorhinal	0	0	0.419391	lower
256	functional connectivity	Microstructure	myelinmap	syn	0.416236	0.140561	-1.13577	527	(0.01, 0.5, 1)	0	0	precuneus	1	0	0.410132	higher
257	functional connectivity	metabolism	cmrglc	syn	0.415301	0.174634	-0.79621	297	(0.01, 0.5, 0.9)	0	0	precuneus	0	0	0.410132	higher
258	functional connectivity	Celltype	Astro	syn	0.413466	0.30898	-0.618153	56	(0.7, 2.5, 0.7)	0	0	precuneus	1	0	0.410132	higher
259	functional connectivity	Microstructure	genepc1	clear	0.410844	0.147816	-0.225965	121	(0.01, 3, 1)	0	0	entorhinal	1	0	0.419391	lower
260	functional connectivity	AD-realted	APOE	syn	0.409492	0.176224	-0.883283	442	(0.01, 0.5, 1)	0	0	precuneus	1	0	0.410132	lower
261	functional connectivity	Celltype	Oligo	clear	0.408393	0.312045	-1.35293	78	(0.1, 1, 0.3)	0	0	precuneus	1	0	0.410132	lower
262	functional connectivity	Receptors	5HT6	clear	0.40817	0.364412	-0.423221	17	(0.7, 3, 1)	0	0	precuneus	1	0	0.410132	lower
263	functional connectivity	Receptors	NET	spread	0.407213	0.339965	-0.511116	10131	(0.9, 0.1, 1)	0	0	entorhinal	0	0	0.419391	lower
264	functional connectivity	Microstructure	myelinmap	spread	0.403651	0.185353	-0.242861	314	(0.9, 1.9, 0.1)	0	0	entorhinal	0	0	0.419391	lower
265	functional connectivity	Celltype	Astro	mis	0.403406	0.328214	-0.596605	55	(0.9, 3, 1)	0	0	precuneus	1	0	0.410132	lower
266	functional connectivity	Receptors	5HT6	syn	0.403163	0.208624	-0.611267	29999	(0.01, 0.5, 0.1)	0	0	precuneus	1	0	0.410132	lower
267	functional connectivity	Microstructure	myelinmap	clear	0.399372	0.215704	-0.134783	29999	(0.7, 3, 1)	0	0	precuneus	0	1	0.410132	lower
268	functional connectivity	Receptors	DAT	syn	0.399168	0.223324	-0.901902	92	(0.3, 3, 1)	0	0	precuneus	0	0	0.410132	lower
269	functional connectivity	Receptors	A4B2	syn	0.399142	0.231856	-0.867886	3195	(0.01, 0.5, 0.1)	0	0	precuneus	1	0	0.410132	lower
270	functional connectivity	Celltype	Astro	clear	0.397565	0.249796	-1.04794	9033	(0.01, 0.1, 0.1)	0	0	precuneus	0	0	0.410132	lower
271	functional connectivity	metabolism	cbv	spread	0.397058	0.154719	-0.410349	213	(0.7, 3, 0.1)	0	0	precuneus	0	0	0.410132	lower
272	functional connectivity	Celltype	OPC	clear	0.392713	0.252034	-1.08427	9064	(0.01, 0.1, 0.1)	0	0	precuneus	0	0	0.410132	lower
273	functional connectivity	Celltype	Neuro-In	mis	0.391957	0.338522	-1.05718	591	(0.01, 2.9, 0.1)	0	0	entorhinal	0	0	0.419391	lower
274	functional connectivity	Celltype	Micro	clear	0.391933	0.263491	-1.05422	7911	(0.01, 0.1, 0.1)	0	0	precuneus	1	0	0.410132	lower
275	functional connectivity	Receptors	M1	mis	0.389166	0.227719	-1.18319	136	(0.01, 1, 1)	0	0	precuneus	0	0	0.410132	lower
276	functional connectivity	Receptors	D1	mis	0.389092	0.276571	-1.27758	87	(0.01, 1.5, 1)	0	0	precuneus	1	0	0.410132	lower
277	functional connectivity	Celltype	Endo	mis	0.384954	0.307737	-1.33837	212	(0.1, 3, 0.1)	0	0	precuneus	1	0	0.410132	lower
278	functional connectivity	Receptors	5HTT	syn	0.383335	0.199639	-0.583189	55	(0.01, 2.9, 1)	0	0	entorhinal	0	0	0.419391	lower
279	functional connectivity	metabolism	cmrglc	clear	0.381781	0.234594	-0.170289	482	(0.3, 3, 0.9)	0	0	entorhinal	0	1	0.419391	lower
280	functional connectivity	Receptors	NMDA	clear	0.381696	0.298129	-0.898705	300	(0.01, 1, 0.1)	0	0	entorhinal	0	1	0.419391	lower
281	functional connectivity	Receptors	D1	clear	0.381487	0.286533	-1.10857	10447	(0.01, 0.1, 0.1)	0	0	precuneus	1	0	0.410132	lower
282	functional connectivity	Celltype	Endo	spread	0.379648	0.21588	-0.310618	286	(0.9, 2, 0.1)	0	0	entorhinal	0	0	0.419391	lower
283	functional connectivity	Receptors	D2	clear	0.379366	0.264249	-1.07759	107	(0.01, 0.1, 1)	0	0	precuneus	1	0	0.410132	lower
284	functional connectivity	Receptors	A4B2	mis	0.378436	0.306817	-1.02254	6212	(0.01, 0.1, 0.1)	0	0	precuneus	1	0	0.410132	lower
285	functional connectivity	Celltype	Oligo	mis	0.377648	0.308899	-1.05042	6191	(0.01, 0.1, 0.1)	0	0	precuneus	1	0	0.410132	lower
286	functional connectivity	Receptors	H3	mis	0.377414	0.307806	-1.03079	6153	(0.01, 0.1, 0.1)	0	0	precuneus	1	0	0.410132	lower
287	functional connectivity	Receptors	VAChT	mis	0.377309	0.307525	-1.02727	6153	(0.01, 0.1, 0.1)	0	0	precuneus	1	0	0.410132	lower
288	functional connectivity	metabolism	cmrglc	mis	0.377291	0.30692	-1.03107	6291	(0.01, 0.1, 0.1)	0	0	precuneus	0	0	0.410132	lower
289	functional connectivity	Receptors	5HT1b	mis	0.377208	0.306621	-1.03379	6239	(0.01, 0.1, 0.1)	0	0	precuneus	1	0	0.410132	lower
290	functional connectivity	Receptors	A4B2	spread	0.376972	0.28625	-0.769958	29999	(0.9, 0.1, 1)	1	0	entorhinal	0	1	0.419391	lower
291	functional connectivity	Receptors	5HT6	mis	0.37684	0.307803	-1.0306	6233	(0.01, 0.1, 0.1)	0	0	precuneus	1	0	0.410132	lower
292	functional connectivity	Receptors	GABAa	mis	0.376803	0.306837	-1.01857	6220	(0.01, 0.1, 0.1)	0	0	precuneus	1	0	0.410132	lower
293	functional connectivity	AD-realted	APOE	mis	0.376726	0.306784	-1.03097	6291	(0.01, 0.1, 0.1)	0	0	precuneus	1	0	0.410132	lower
294	functional connectivity	Receptors	NET	mis	0.376294	0.307468	-1.03754	6242	(0.01, 0.1, 0.1)	0	0	precuneus	1	0	0.410132	lower
295	functional connectivity	metabolism	cmr02	mis	0.376257	0.307258	-1.03377	6290	(0.01, 0.1, 0.1)	0	0	precuneus	1	0	0.410132	lower
296	functional connectivity	Receptors	NMDA	mis	0.376239	0.308357	-1.03353	6200	(0.01, 0.1, 0.1)	0	0	precuneus	1	0	0.410132	lower
297	functional connectivity	Microstructure	genepc1	mis	0.376149	0.307371	-1.0304	6279	(0.01, 0.1, 0.1)	0	0	precuneus	1	0	0.410132	lower
298	functional connectivity	Receptors	5HTT	mis	0.375955	0.307946	-1.0278	6134	(0.01, 0.1, 0.1)	0	0	precuneus	1	0	0.410132	lower
299	functional connectivity	Microstructure	myelinmap	mis	0.375926	0.307257	-1.03539	6271	(0.01, 0.1, 0.1)	0	0	precuneus	1	0	0.410132	lower
300	functional connectivity	metabolism	cbf	mis	0.375813	0.307452	-1.03918	6272	(0.01, 0.1, 0.1)	0	0	precuneus	1	0	0.410132	lower
301	functional connectivity	metabolism	cbv	mis	0.375704	0.307854	-1.02751	6228	(0.01, 0.1, 0.1)	0	0	precuneus	1	0	0.410132	lower
302	functional connectivity	Celltype	Neuro-In	clear	0.374791	0.309343	-1.37432	47	(0.01, 1, 1)	0	0	precuneus	1	0	0.410132	lower
303	functional connectivity	Receptors	CB1	clear	0.373769	0.298475	-0.994497	70	(0.01, 0.1, 1)	0	0	precuneus	1	0	0.410132	lower
304	functional connectivity	Cortical expansion	evoexp	clear	0.372198	0.311693	-0.987894	57	(0.01, 0.1, 1)	0	0	precuneus	1	0	0.410132	lower
305	functional connectivity	Receptors	5HT1a	clear	0.372167	0.288438	-1.10751	86	(0.01, 0.1, 1)	0	0	precuneus	1	0	0.410132	lower
306	functional connectivity	Microstructure	thickness	clear	0.371755	0.304858	-1.01406	68	(0.01, 0.1, 1)	0	0	precuneus	1	0	0.410132	lower
307	functional connectivity	Receptors	MOR	clear	0.371357	0.308939	-1.02765	63	(0.01, 0.1, 1)	0	0	precuneus	1	0	0.410132	lower
308	functional connectivity	Receptors	CB1	mis	0.370938	0.223921	-0.0866979	29999	(0.5, 3, 1)	0	0	entorhinal	0	0	0.419391	lower
309	functional connectivity	metabolism	cbf	spread	0.370164	0.164805	-0.595144	343	(0.9, 2.5, 0.1)	0	0	entorhinal	0	0	0.419391	lower
310	functional connectivity	Celltype	Neuro-Ex	clear	0.367838	0.327315	-1.53264	51	(0.01, 1, 1)	0	0	precuneus	1	0	0.410132	lower
311	functional connectivity	Receptors	5HT2a	clear	0.367056	0.314559	-1.05202	90	(0.01, 0.1, 1)	0	0	precuneus	1	0	0.410132	lower
312	functional connectivity	Cortical expansion	devexp	clear	0.366308	0.320276	-1.02154	61	(0.01, 0.1, 1)	0	0	precuneus	1	0	0.410132	lower
313	functional connectivity	Receptors	VAChT	clear	0.365335	0.34115	-0.733686	136	(0.7, 0.5, 0.3)	0	0	entorhinal	0	0	0.419391	lower
314	functional connectivity	Receptors	M1	clear	0.365041	0.37224	-0.669502	19	(0.7, 3, 1)	0	0	precuneus	1	0	0.410132	lower
315	functional connectivity	Microstructure	genepc1	clear	0.363306	0.2867	-0.0549407	29999	(0.5, 3, 1)	0	0	precuneus	0	0	0.410132	lower
316	functional connectivity	Receptors	5HT4	clear	0.362511	0.332533	-1.01737	55	(0.01, 0.1, 1)	0	0	precuneus	1	0	0.410132	lower
317	functional connectivity	Cortical expansion	scalingnih	clear	0.362184	0.313996	-1.06953	100	(0.01, 0.1, 1)	0	0	precuneus	1	0	0.410132	lower
318	functional connectivity	Receptors	NMDA	syn	0.360465	0.202906	-0.318504	55	(0.3, 3, 1)	0	0	entorhinal	0	0	0.419391	lower
319	functional connectivity	AD-realted	Abeta	clear	0.359934	0.340819	-1.01745	54	(0.01, 0.1, 1)	0	0	precuneus	1	0	0.410132	lower
320	functional connectivity	Cortical expansion	scalingpnc	clear	0.359648	0.329791	-1.01458	69	(0.01, 0.1, 1)	0	0	precuneus	1	0	0.410132	lower
321	functional connectivity	Cortical expansion	scaling	clear	0.359282	0.329841	-1.02773	72	(0.01, 0.1, 1)	0	0	precuneus	1	0	0.410132	lower
322	functional connectivity	Cortical expansion	scalinghcp	clear	0.359248	0.328631	-1.02606	76	(0.01, 0.1, 1)	0	0	precuneus	1	0	0.410132	lower
323	functional connectivity	AD-realted	MAPT	clear	0.357511	0.331787	-1.03306	58	(0.01, 0.1, 1)	0	0	precuneus	1	0	0.410132	lower
324	functional connectivity	Receptors	DAT	mis	0.356204	0.32213	-1.03667	46	(0.01, 2, 1)	0	0	precuneus	1	0	0.410132	lower
325	functional connectivity	Celltype	Astro	syn	0.349306	0.286747	-1.06812	53	(0.1, 3, 1)	0	0	entorhinal	0	0	0.419391	lower
326	functional connectivity	Receptors	H3	clear	0.341879	0.388804	-1.11272	37	(0.9, 1, 1)	0	0	precuneus	1	0	0.410132	lower
327	functional connectivity	Receptors	H3	clear	0.330183	0.272487	-0.314005	728	(0.9, 3, 0.5)	0	0	entorhinal	0	0	0.419391	lower
328	functional connectivity	AD-realted	APOE	mis	0.328712	0.404381	-1.66737	73	(0.7, 3, 0.7)	0	0	entorhinal	0	0	0.419391	lower
329	functional connectivity	Receptors	VAChT	syn	0.325901	0.192685	-0.457039	56	(0.05, 3, 1)	0	0	entorhinal	0	0	0.419391	lower
330	functional connectivity	Celltype	OPC	syn	0.324817	0.288736	-1.22117	61	(0.3, 2.5, 1)	0	0	entorhinal	0	0	0.419391	lower
331	functional connectivity	metabolism	cmr02	syn	0.322174	0.333382	-1.0909	65	(0.5, 3, 1)	0	0	entorhinal	0	0	0.419391	lower
332	functional connectivity	metabolism	cbv	syn	0.321463	0.446697	-1.27957	22	(0.9, 3, 1)	0	0	precuneus	1	0	0.410132	lower
333	functional connectivity	Receptors	A4B2	clear	0.321209	0.425584	-1.08071	28	(0.9, 0.5, 1)	0	0	precuneus	1	0	0.410132	lower
334	functional connectivity	Celltype	Micro	clear	0.320569	0.318407	-0.489873	33	(0.1, 3, 1)	0	0	entorhinal	0	0	0.419391	lower
335	functional connectivity	Receptors	GABAa	clear	0.317791	0.45452	-1.07474	3	(0.9, 3, 1)	0	0	precuneus	1	0	0.410132	lower
336	functional connectivity	Receptors	mGluR5	clear	0.317724	0.445579	-1.10829	5	(0.7, 3, 1)	0	0	precuneus	1	0	0.410132	lower
337	functional connectivity	Receptors	H3	syn	0.307789	0.273349	-0.777599	59	(0.1, 3, 1)	0	0	entorhinal	0	0	0.419391	lower
338	functional connectivity	Receptors	D2	mis	0.307213	0.342994	-0.367976	178	(0.9, 2.5, 1)	0	0	entorhinal	0	0	0.419391	lower
339	functional connectivity	Receptors	GABAa	clear	0.30372	0.214682	-0.424513	705	(0.9, 3, 1)	0	0	entorhinal	0	0	0.419391	lower
340	functional connectivity	metabolism	cmr02	mis	0.301603	0.353663	-1.15649	69	(0.7, 3, 0.9)	0	0	entorhinal	0	0	0.419391	lower
341	functional connectivity	AD-realted	APOE	syn	0.289451	0.404033	-1.44243	79	(0.9, 3, 0.5)	0	0	entorhinal	0	0	0.419391	lower
342	functional connectivity	Receptors	5HT6	clear	0.287877	0.191945	-0.448282	275	(0.9, 3, 1)	0	0	entorhinal	0	0	0.419391	lower
343	functional connectivity	metabolism	cbf	syn	0.287402	0.346877	-0.268864	29999	(0.01, 0.9, 1)	0	0	entorhinal	0	0	0.419391	lower
344	functional connectivity	Microstructure	myelinmap	syn	0.285581	0.301922	-0.747381	48	(0.5, 3, 1)	0	0	entorhinal	0	0	0.419391	lower
345	functional connectivity	Receptors	5HT6	syn	0.284881	0.338266	-0.81691	68	(0.5, 3, 1)	0	0	entorhinal	0	0	0.419391	lower
346	functional connectivity	Receptors	D1	mis	0.283267	0.217064	-0.454092	29999	(0.5, 2.9, 1)	0	0	entorhinal	0	0	0.419391	lower
347	functional connectivity	Receptors	GABAa	syn	0.275938	0.371137	-0.460168	29999	(0.01, 2.9, 1)	0	0	entorhinal	0	0	0.419391	lower
348	functional connectivity	Receptors	NET	syn	0.272202	0.305917	-0.45191	29999	(0.01, 0.9, 1)	0	0	entorhinal	0	0	0.419391	lower
349	functional connectivity	Receptors	A4B2	clear	0.266342	0.25849	-0.666082	55	(0.9, 3, 1)	0	0	entorhinal	0	0	0.419391	lower
350	functional connectivity	Receptors	5HT1b	syn	0.264833	0.317481	-0.369893	29999	(0.01, 0.9, 1)	0	0	entorhinal	0	0	0.419391	lower
351	functional connectivity	Receptors	5HT6	mis	0.261097	0.391837	-1.08082	126	(0.7, 3, 1)	0	0	entorhinal	0	0	0.419391	lower
352	functional connectivity	Receptors	5HT1b	mis	0.260867	0.366835	-1.37241	71	(0.7, 3, 0.9)	0	0	entorhinal	0	0	0.419391	lower
353	functional connectivity	Receptors	M1	clear	0.259373	0.209562	-0.393496	96	(0.9, 3, 1)	0	0	entorhinal	0	0	0.419391	lower
354	functional connectivity	metabolism	cbv	syn	0.259151	0.30267	-1.05757	46	(0.3, 3, 1)	0	0	entorhinal	0	0	0.419391	lower
355	functional connectivity	Microstructure	genepc1	mis	0.251153	0.369752	-1.44423	62	(0.7, 3, 1)	0	0	entorhinal	0	0	0.419391	lower
356	functional connectivity	Receptors	DAT	clear	0.24963	0.214421	-0.527666	178	(0.01, 1.5, 1)	0	0	entorhinal	0	0	0.419391	lower
357	functional connectivity	Microstructure	genepc1	syn	0.244394	0.341678	-1.11727	56	(0.5, 3, 1)	0	0	entorhinal	0	0	0.419391	lower
358	functional connectivity	Celltype	OPC	mis	0.226374	0.236633	-0.616001	29999	(0.3, 2.9, 0.1)	0	0	entorhinal	0	0	0.419391	lower
359	functional connectivity	Receptors	A4B2	syn	0.222785	0.296285	-0.389451	865	(0.01, 0.9, 1)	0	0	entorhinal	0	0	0.419391	lower
360	functional connectivity	Celltype	Oligo	clear	0.221836	0.309589	-0.418183	29999	(0.01, 1.5, 1)	0	0	entorhinal	0	0	0.419391	lower
361	functional connectivity	Celltype	Endo	mis	0.213172	0.385799	-2.22575	312	(0.01, 2.9, 0.1)	0	0	entorhinal	0	0	0.419391	lower
362	functional connectivity	Celltype	Neuro-Ex	clear	0.212638	0.279612	-0.554622	29999	(0.01, 2, 1)	0	0	entorhinal	0	0	0.419391	lower
363	functional connectivity	Receptors	D2	clear	0.20975	0.398097	-1.00377	28	(0.01, 2.9, 1)	0	0	entorhinal	0	0	0.419391	lower
364	functional connectivity	Receptors	A4B2	mis	0.205215	0.188954	-1.08015	1878	(0.01, 1.5, 0.1)	0	0	entorhinal	0	0	0.419391	lower
365	functional connectivity	Receptors	NMDA	mis	0.196209	0.403312	-2.11564	131	(0.5, 3, 1)	0	0	entorhinal	0	0	0.419391	lower
366	functional connectivity	Celltype	Micro	mis	0.190868	0.288431	-0.873115	318	(0.1, 3, 0.1)	0	0	entorhinal	0	0	0.419391	lower
367	functional connectivity	Celltype	Astro	mis	0.182531	0.23458	-0.763798	29999	(0.3, 2.9, 0.1)	0	0	entorhinal	0	0	0.419391	lower
368	functional connectivity	Celltype	Neuro-In	clear	0.161448	0.210678	-0.867765	29999	(0.01, 0.9, 0.1)	0	0	entorhinal	0	0	0.419391	lower
369	functional connectivity	Receptors	MOR	clear	0.154544	0.387439	-0.484767	29999	(0.01, 2.9, 1)	0	0	entorhinal	0	0	0.419391	lower
370	functional connectivity	Celltype	Oligo	mis	0.153206	0.248359	-0.67707	29999	(0.01, 2.5, 0.1)	0	0	entorhinal	0	0	0.419391	lower
371	functional connectivity	Microstructure	myelinmap	mis	0.114926	0.39594	-1.62287	60	(0.7, 3, 0.9)	0	0	entorhinal	0	0	0.419391	lower
372	functional connectivity	Receptors	DAT	mis	0.0997766	0.246883	-0.763596	29999	(0.3, 3, 1)	0	0	entorhinal	0	0	0.419391	lower
373	functional connectivity	Receptors	D1	clear	0.0836477	0.405143	-1.99081	478	(0.01, 0.5, 0.1)	0	0	entorhinal	0	0	0.419391	lower
374	functional connectivity	Receptors	GABAa	mis	0.0825899	0.444089	-1.80338	60	(0.7, 3, 1)	0	0	entorhinal	0	0	0.419391	lower
375	functional connectivity	Receptors	H3	mis	0.0764831	0.263702	-1.69613	2850	(0.01, 1.5, 0.1)	0	0	entorhinal	0	0	0.419391	lower
376	functional connectivity	Receptors	5HT2a	clear	0.0745133	0.477935	-1.85404	689	(0.5, 0.1, 0.1)	0	0	entorhinal	0	0	0.419391	lower
377	functional connectivity	AD-realted	Abeta	clear	0.067122	0.49062	-1.87306	457	(0.5, 0.1, 0.1)	0	0	entorhinal	0	0	0.419391	lower
378	functional connectivity	Cortical expansion	evoexp	clear	0.0667426	0.367962	-0.655241	29999	(0.3, 3, 1)	0	0	entorhinal	0	0	0.419391	lower
379	functional connectivity	Cortical expansion	scalingpnc	clear	0.0630165	0.476192	-1.8575	6825	(0.01, 0.1, 0.1)	0	0	entorhinal	0	0	0.419391	lower
380	functional connectivity	metabolism	cbv	mis	0.0596502	0.464228	-1.59934	63	(0.7, 3, 0.7)	0	0	entorhinal	0	0	0.419391	lower
381	functional connectivity	Receptors	mGluR5	clear	0.0554528	0.378402	-0.788849	29999	(0.9, 3, 1)	0	0	entorhinal	0	0	0.419391	lower
382	functional connectivity	Receptors	NET	mis	0.0550324	0.469012	-1.95114	799	(0.01, 0.9, 0.1)	0	0	entorhinal	0	0	0.419391	lower
383	functional connectivity	Receptors	CB1	clear	0.0546894	0.483043	-2.02527	8768	(0.01, 0.1, 0.1)	0	0	entorhinal	0	0	0.419391	lower
384	functional connectivity	metabolism	cbf	mis	0.0545225	0.475122	-1.94404	9328	(0.01, 0.5, 0.1)	0	0	entorhinal	0	0	0.419391	lower
385	functional connectivity	Receptors	VAChT	mis	0.0537166	0.462615	-1.92999	12344	(0.01, 0.9, 0.1)	0	0	entorhinal	0	0	0.419391	lower
386	functional connectivity	Cortical expansion	scaling	clear	0.0531396	0.48517	-1.83264	6896	(0.01, 0.1, 0.1)	0	0	entorhinal	0	0	0.419391	lower
387	functional connectivity	Cortical expansion	scalingnih	clear	0.0504936	0.488451	-1.85654	6938	(0.01, 0.1, 0.1)	0	0	entorhinal	0	0	0.419391	lower
388	functional connectivity	Cortical expansion	scalinghcp	clear	0.0463725	0.492666	-1.85033	6891	(0.01, 0.1, 0.1)	0	0	entorhinal	0	0	0.419391	lower
389	functional connectivity	Receptors	5HTT	mis	0.0450434	0.490015	-1.93934	416	(0.01, 1.5, 0.1)	0	0	entorhinal	0	0	0.419391	lower
390	functional connectivity	Receptors	5HT4	clear	0.0409148	0.506955	-1.99428	691	(0.01, 0.1, 0.1)	0	0	entorhinal	0	0	0.419391	lower
391	functional connectivity	Cortical expansion	devexp	clear	0.0346802	0.481188	-1.60701	25	(0.01, 3, 1)	0	0	entorhinal	0	0	0.419391	lower
392	functional connectivity	Receptors	5HT1a	clear	0.0322377	0.503158	-1.96386	10287	(0.01, 0.1, 0.1)	0	0	entorhinal	0	0	0.419391	lower
393	functional connectivity	Microstructure	thickness	clear	0.0317925	0.504801	-1.96458	8756	(0.01, 0.1, 0.1)	0	0	entorhinal	0	0	0.419391	lower
394	functional connectivity	AD-realted	MAPT	clear	0.0315857	0.511505	-1.94553	7372	(0.01, 0.1, 0.1)	0	0	entorhinal	0	0	0.419391	lower
1	gene coexpression	AD-realted	MAPT	spread	0.645241	0.0922829	0.285626	1106	(0.01, 1.5, 0.1)	1	0	precuneus	1	1	0.507077	higher
2	gene coexpression	AD-realted	MAPT	syn	0.639313	0.113962	0.358678	195	(0.7, 2.5, 0.1)	0	0	precuneus	1	0	0.507077	higher
3	gene coexpression	AD-realted	MAPT	mis	0.613098	0.13333	0.334995	250	(0.9, 3, 0.3)	0	0	precuneus	1	0	0.507077	higher
4	gene coexpression	AD-realted	MAPT	spread	0.607295	0.273315	0.188395	14253	(0.3, 3, 0.1)	1	0	entorhinal	0	1	0.478484	higher
5	gene coexpression	Receptors	5HT4	syn	0.603834	0.188958	0.252297	133	(0.5, 2.5, 0.1)	1	0	precuneus	1	1	0.507077	higher
6	gene coexpression	Receptors	5HT4	mis	0.599309	0.188469	0.171826	1865	(0.9, 0.9, 1)	0	0	precuneus	1	0	0.507077	higher
7	gene coexpression	Cortical expansion	scaling	syn	0.585431	0.138893	0.118014	507	(0.9, 0.9, 0.1)	1	0	precuneus	1	1	0.507077	higher
8	gene coexpression	Receptors	5HT4	spread	0.584005	0.137054	0.068101	493	(0.1, 2, 0.1)	0	0	precuneus	1	0	0.507077	higher
9	gene coexpression	Cortical expansion	scaling	mis	0.565353	0.154556	0.116017	29999	(0.9, 1, 1)	0	0	precuneus	1	0	0.507077	higher
10	gene coexpression	Cortical expansion	devexp	mis	0.563728	0.14569	0.0934453	162	(0.5, 3, 0.1)	1	0	precuneus	1	1	0.507077	higher
11	gene coexpression	Cortical expansion	scaling	mis	0.563591	0.138959	0.182164	184	(0.5, 3, 1)	1	0	entorhinal	0	0	0.478484	higher
12	gene coexpression	metabolism	cbf	clear	0.554729	0.170049	-0.0622058	46	(0.01, 1.5, 1)	1	0	precuneus	1	1	0.507077	higher
13	gene coexpression	Cortical expansion	scalingnih	mis	0.549546	0.181991	0.0788397	686	(0.9, 1.5, 0.1)	1	0	precuneus	1	1	0.507077	higher
14	gene coexpression	Cortical expansion	scalinghcp	mis	0.54834	0.136949	0.0989253	201	(0.5, 2.9, 1)	1	0	entorhinal	1	1	0.478484	higher
15	gene coexpression	Cortical expansion	scalinghcp	syn	0.538167	0.130267	0.110481	899	(0.7, 0.9, 0.1)	1	0	precuneus	1	0	0.507077	higher
16	gene coexpression	Microstructure	thickness	spread	0.536773	0.152711	-0.118352	306	(0.01, 2.9, 0.1)	1	0	precuneus	1	1	0.507077	higher
17	gene coexpression	metabolism	cmr02	clear	0.53643	0.190655	-0.187018	31	(0.01, 3, 1)	1	0	precuneus	1	1	0.507077	higher
18	gene coexpression	Receptors	5HT1a	spread	0.536045	0.160832	-0.18048	356	(0.1, 2.5, 0.1)	1	0	precuneus	1	1	0.507077	higher
19	gene coexpression	Cortical expansion	scalinghcp	mis	0.535738	0.163139	0.148957	29999	(0.9, 1, 0.1)	0	0	precuneus	0	1	0.507077	higher
20	gene coexpression	Cortical expansion	scalingnih	syn	0.533935	0.138949	0.00857794	468	(0.01, 2.5, 0.1)	0	0	precuneus	1	0	0.507077	higher
21	gene coexpression	Cortical expansion	evoexp	spread	0.53334	0.136011	-0.0310353	324	(0.01, 2.5, 0.1)	1	0	precuneus	1	1	0.507077	higher
22	gene coexpression	Receptors	D2	spread	0.52954	0.154765	-0.0681647	313	(0.01, 2.9, 0.1)	1	0	precuneus	1	1	0.507077	higher
23	gene coexpression	Cortical expansion	scaling	syn	0.529374	0.144808	0.0663586	105	(0.5, 3, 1)	0	0	entorhinal	0	1	0.478484	higher
24	gene coexpression	Cortical expansion	scalinghcp	syn	0.524529	0.143208	0.0264438	121	(0.3, 3, 0.7)	0	0	entorhinal	0	0	0.478484	higher
25	gene coexpression	Cortical expansion	evoexp	mis	0.524279	0.125325	-0.0269462	321	(0.05, 3, 0.1)	0	0	precuneus	1	0	0.507077	higher
26	gene coexpression	AD-realted	MAPT	mis	0.523643	0.157328	0.0656941	686	(0.1, 3, 0.3)	0	0	entorhinal	0	0	0.478484	higher
27	gene coexpression	Cortical expansion	scalingnih	mis	0.522357	0.153375	0.0161605	213	(0.3, 3, 0.7)	1	0	entorhinal	0	1	0.478484	higher
28	gene coexpression	Receptors	mGluR5	spread	0.517755	0.14236	0.0690518	765	(0.01, 2.5, 0.1)	1	0	precuneus	1	1	0.507077	higher
29	gene coexpression	Receptors	5HT2a	mis	0.517224	0.144603	-1.51196e-05	265	(0.3, 3, 0.1)	1	0	precuneus	1	1	0.507077	higher
30	gene coexpression	metabolism	cbv	spread	0.517004	0.16026	0.125275	572	(0.5, 2, 0.1)	1	0	entorhinal	1	1	0.478484	higher
31	gene coexpression	Microstructure	thickness	mis	0.513663	0.238672	-0.185038	170	(0.7, 2.5, 0.1)	0	0	precuneus	1	0	0.507077	higher
32	gene coexpression	Receptors	D2	mis	0.51346	0.282222	0.00200686	481	(0.9, 1, 1)	0	0	precuneus	1	0	0.507077	higher
33	gene coexpression	Receptors	D2	syn	0.51312	0.220738	-0.019813	379	(0.7, 0.9, 0.1)	0	0	precuneus	1	0	0.507077	higher
34	gene coexpression	Cortical expansion	scalinghcp	spread	0.510857	0.151906	0.10708	375	(0.5, 2.5, 0.1)	0	0	entorhinal	1	0	0.478484	higher
35	gene coexpression	Cortical expansion	scalingpnc	syn	0.510297	0.146881	0.0279499	106	(0.5, 3, 1)	1	0	entorhinal	1	1	0.478484	higher
36	gene coexpression	AD-realted	Abeta	spread	0.510248	0.147137	-0.347302	122	(0.9, 3, 1)	1	0	precuneus	1	1	0.507077	higher
37	gene coexpression	AD-realted	APOE	spread	0.509198	0.144248	0.110004	361	(0.5, 2.5, 0.1)	1	0	entorhinal	1	1	0.478484	higher
38	gene coexpression	Receptors	5HT4	spread	0.506993	0.265595	0.111954	29999	(0.5, 2.5, 0.1)	1	0	entorhinal	0	0	0.478484	higher
39	gene coexpression	Cortical expansion	scalingnih	spread	0.506366	0.131002	0.00364712	739	(0.01, 1.9, 0.1)	0	0	precuneus	1	0	0.507077	lower
40	gene coexpression	Cortical expansion	scalingnih	syn	0.506049	0.154656	-0.00123208	200	(0.3, 2.5, 0.3)	0	0	entorhinal	0	0	0.478484	higher
41	gene coexpression	Receptors	5HT2a	syn	0.503059	0.265709	-0.374293	309	(0.9, 0.9, 0.1)	0	0	precuneus	1	0	0.507077	lower
42	gene coexpression	Cortical expansion	devexp	spread	0.502325	0.127369	-0.0618218	457	(0.1, 2, 0.1)	0	0	precuneus	1	0	0.507077	lower
43	gene coexpression	Cortical expansion	scalingpnc	mis	0.502127	0.146401	0.0249995	197	(0.5, 3, 1)	0	0	entorhinal	1	0	0.478484	higher
44	gene coexpression	metabolism	cmrglc	clear	0.502016	0.221337	-0.248385	29	(0.01, 3, 1)	1	0	precuneus	1	1	0.507077	lower
45	gene coexpression	Cortical expansion	scalingpnc	mis	0.499258	0.148215	0.0222121	522	(0.3, 3, 0.1)	1	0	precuneus	0	0	0.507077	lower
46	gene coexpression	Cortical expansion	scaling	spread	0.496324	0.158917	0.0968951	371	(0.5, 2.5, 0.1)	0	0	entorhinal	1	0	0.478484	higher
47	gene coexpression	Cortical expansion	scalingpnc	spread	0.490559	0.137338	-0.102439	1076	(0.7, 1, 0.1)	0	0	precuneus	1	0	0.507077	lower
48	gene coexpression	Microstructure	genepc1	spread	0.489538	0.153154	0.0306388	327	(0.5, 2.9, 0.1)	1	0	entorhinal	1	1	0.478484	higher
49	gene coexpression	Receptors	MOR	spread	0.488751	0.173011	-0.334024	248	(0.1, 3, 0.1)	1	0	precuneus	1	1	0.507077	lower
50	gene coexpression	AD-realted	Abeta	mis	0.4885	0.223227	-0.361312	153	(0.9, 3, 0.7)	0	0	precuneus	1	0	0.507077	lower
51	gene coexpression	Receptors	5HT1b	clear	0.484606	0.134583	-0.223244	86	(0.01, 1, 1)	1	0	precuneus	1	1	0.507077	lower
52	gene coexpression	Cortical expansion	devexp	syn	0.484067	0.193786	-0.21162	5108	(0.9, 0.5, 0.1)	0	0	precuneus	1	0	0.507077	lower
53	gene coexpression	Receptors	CB1	spread	0.479502	0.173233	-0.383826	267	(0.01, 3, 0.1)	1	0	precuneus	1	1	0.507077	lower
54	gene coexpression	AD-realted	Abeta	syn	0.477062	0.186569	0.103186	163	(0.9, 3, 0.1)	0	0	precuneus	1	0	0.507077	lower
55	gene coexpression	Cortical expansion	scalingpnc	syn	0.474764	0.144342	-0.0375404	359	(0.01, 2.9, 0.1)	0	0	precuneus	0	1	0.507077	lower
56	gene coexpression	Receptors	5HT1a	mis	0.472352	0.251748	-0.445898	431	(0.5, 1.9, 0.1)	0	0	precuneus	1	0	0.507077	lower
57	gene coexpression	Microstructure	thickness	syn	0.471055	0.178513	-0.0993505	333	(0.7, 1, 0.1)	0	0	precuneus	1	0	0.507077	lower
58	gene coexpression	Receptors	5HT6	spread	0.466741	0.150083	-0.11951	792	(0.01, 2.5, 0.1)	1	0	precuneus	1	1	0.507077	lower
59	gene coexpression	Microstructure	myelinmap	spread	0.464749	0.16695	0.0455896	389	(0.5, 2.5, 0.1)	1	0	entorhinal	1	1	0.478484	lower
60	gene coexpression	Receptors	5HT4	mis	0.464641	0.202404	0.0107543	491	(0.9, 2, 0.1)	0	0	entorhinal	0	0	0.478484	lower
61	gene coexpression	Receptors	5HTT	clear	0.456851	0.195288	0.016464	64	(0.9, 3, 0.1)	1	0	precuneus	1	1	0.507077	lower
62	gene coexpression	Cortical expansion	scalingnih	spread	0.456202	0.176408	0.0599416	381	(0.5, 2.5, 0.1)	0	0	entorhinal	0	0	0.478484	lower
63	gene coexpression	Receptors	M1	syn	0.455772	0.142227	-0.100896	605	(0.1, 2, 0.1)	1	0	precuneus	1	1	0.507077	lower
64	gene coexpression	Receptors	MOR	spread	0.454899	0.340786	-0.0905019	29999	(0.5, 2.9, 0.1)	1	0	entorhinal	0	1	0.478484	lower
65	gene coexpression	Receptors	5HTT	clear	0.453975	0.159457	-0.126258	99	(0.01, 2, 1)	1	0	entorhinal	0	1	0.478484	lower
66	gene coexpression	Receptors	5HT1a	spread	0.452632	0.272292	-0.219254	29999	(0.3, 3, 0.1)	1	0	entorhinal	0	1	0.478484	lower
67	gene coexpression	Receptors	D1	spread	0.448826	0.166732	-0.000640608	792	(0.05, 2.5, 0.1)	1	0	precuneus	1	1	0.507077	lower
68	gene coexpression	Celltype	Neuro-Ex	syn	0.445427	0.333487	-0.472839	189	(0.9, 1, 0.1)	1	0	precuneus	1	1	0.507077	lower
69	gene coexpression	Celltype	Neuro-Ex	mis	0.44378	0.349124	-0.50513	161	(0.9, 2, 0.1)	0	0	precuneus	1	0	0.507077	lower
70	gene coexpression	Celltype	Neuro-Ex	syn	0.443254	0.144987	-0.258888	114	(0.01, 3, 1)	1	0	entorhinal	0	1	0.478484	lower
71	gene coexpression	Receptors	M1	syn	0.438932	0.217683	-0.198789	192	(0.1, 3, 0.3)	1	0	entorhinal	0	1	0.478484	lower
72	gene coexpression	Celltype	OPC	spread	0.43747	0.153073	-0.45019	376	(0.01, 2.5, 0.1)	1	0	precuneus	1	1	0.507077	lower
73	gene coexpression	Receptors	5HT1a	syn	0.436334	0.212793	-0.364494	232	(0.3, 2, 0.1)	0	0	precuneus	1	0	0.507077	lower
74	gene coexpression	Microstructure	thickness	spread	0.435797	0.201973	0.0687261	399	(0.3, 3, 0.1)	1	0	entorhinal	0	1	0.478484	lower
75	gene coexpression	Cortical expansion	scalingpnc	spread	0.435533	0.183	0.0237044	311	(0.5, 2.9, 0.1)	0	0	entorhinal	0	0	0.478484	lower
76	gene coexpression	Receptors	VAChT	clear	0.435371	0.187273	-0.280495	65	(0.5, 3, 1)	1	0	entorhinal	1	1	0.478484	lower
77	gene coexpression	Cortical expansion	evoexp	syn	0.434387	0.141539	-0.175255	304	(0.1, 2, 0.1)	0	0	precuneus	1	0	0.507077	lower
78	gene coexpression	Receptors	5HT4	syn	0.433773	0.204284	-0.0840543	504	(0.9, 1, 0.1)	0	0	entorhinal	0	1	0.478484	lower
79	gene coexpression	AD-realted	Abeta	spread	0.430326	0.332205	-0.0104486	5067	(0.5, 3, 0.1)	1	0	entorhinal	0	1	0.478484	lower
80	gene coexpression	Receptors	DAT	spread	0.429919	0.16603	-0.0781788	882	(0.01, 2.5, 0.1)	1	0	precuneus	1	1	0.507077	lower
81	gene coexpression	Celltype	Endo	clear	0.429384	0.17436	-0.00391421	99	(0.7, 3, 0.3)	1	0	precuneus	1	1	0.507077	lower
82	gene coexpression	Cortical expansion	evoexp	spread	0.425907	0.187515	0.0196812	380	(0.5, 2.5, 0.1)	1	0	entorhinal	0	1	0.478484	lower
83	gene coexpression	Celltype	Neuro-In	mis	0.424562	0.350569	-0.574985	277	(0.9, 1.5, 0.1)	1	0	precuneus	1	1	0.507077	lower
84	gene coexpression	Celltype	Neuro-In	syn	0.423339	0.344096	-0.575253	274	(0.9, 0.9, 0.1)	0	0	precuneus	1	0	0.507077	lower
85	gene coexpression	Cortical expansion	scalinghcp	spread	0.422915	0.249652	-0.0447178	1455	(0.9, 2.5, 1)	0	0	precuneus	0	0	0.507077	lower
86	gene coexpression	AD-realted	MAPT	syn	0.422377	0.175457	-0.0378364	679	(0.1, 2, 0.1)	0	0	entorhinal	0	0	0.478484	lower
87	gene coexpression	Receptors	5HT2a	mis	0.421578	0.216723	-0.406706	196	(0.5, 3, 0.9)	1	0	entorhinal	0	1	0.478484	lower
88	gene coexpression	Receptors	NMDA	spread	0.421446	0.178733	-0.579869	880	(0.01, 2.5, 0.1)	1	0	precuneus	1	1	0.507077	lower
89	gene coexpression	Receptors	D2	spread	0.420472	0.206882	0.0381118	408	(0.3, 3, 0.1)	1	0	entorhinal	0	1	0.478484	lower
90	gene coexpression	Receptors	mGluR5	mis	0.420376	0.201964	-1.13471	253	(0.5, 1.5, 1)	0	0	precuneus	1	0	0.507077	lower
91	gene coexpression	Celltype	Neuro-Ex	spread	0.419856	0.19874	0.0376522	399	(0.5, 2.5, 0.1)	0	0	entorhinal	1	0	0.478484	lower
92	gene coexpression	Receptors	VAChT	spread	0.416983	0.172436	-0.217593	566	(0.01, 3, 0.1)	1	0	precuneus	1	0	0.507077	lower
93	gene coexpression	Celltype	Endo	syn	0.41688	0.149215	-0.175887	141	(0.05, 2, 1)	1	0	entorhinal	1	0	0.478484	lower
94	gene coexpression	Cortical expansion	scaling	spread	0.41602	0.207896	-0.59742	115	(0.9, 3, 1)	0	0	precuneus	0	0	0.507077	lower
95	gene coexpression	Cortical expansion	evoexp	mis	0.415089	0.253659	-0.1517	214	(0.7, 3, 0.3)	0	0	entorhinal	0	0	0.478484	lower
96	gene coexpression	Celltype	OPC	spread	0.414178	0.176202	-0.0427678	434	(0.5, 2.5, 0.1)	1	0	entorhinal	0	1	0.478484	lower
97	gene coexpression	AD-realted	Cluster3	spread	0.414141	0.153689	-0.178217	627	(0.01, 2.5, 0.1)	0	0	precuneus	1	0	0.507077	lower
98	gene coexpression	AD-realted	Cluster2	clear	0.414141	0.153689	-0.178217	627	(0.01, 2.5, 0.1)	0	0	precuneus	1	0	0.507077	lower
99	gene coexpression				0.414141	0.153689	-0.178217	627	(0.01, 2.5, 0.1)	0	1	precuneus	1	0	0.507077	lower
100	gene coexpression	AD-realted	Cluster1	clear	0.414141	0.153689	-0.178217	627	(0.01, 2.5, 0.1)	0	0	precuneus	1	0	0.507077	lower
101	gene coexpression	AD-realted	Cluster1	mis	0.414141	0.153689	-0.178217	627	(0.01, 2.5, 0.1)	0	0	precuneus	1	0	0.507077	lower
102	gene coexpression	AD-realted	Cluster1	spread	0.414141	0.153689	-0.178217	627	(0.01, 2.5, 0.1)	0	0	precuneus	1	0	0.507077	lower
103	gene coexpression	AD-realted	Cluster1	syn	0.414141	0.153689	-0.178217	627	(0.01, 2.5, 0.1)	1	0	precuneus	1	1	0.507077	lower
104	gene coexpression	AD-realted	Cluster2	spread	0.414141	0.153689	-0.178217	627	(0.01, 2.5, 0.1)	0	0	precuneus	1	0	0.507077	lower
105	gene coexpression	AD-realted	Cluster2	mis	0.414141	0.153689	-0.178217	627	(0.01, 2.5, 0.1)	0	0	precuneus	1	0	0.507077	lower
106	gene coexpression	AD-realted	Cluster2	syn	0.414141	0.153689	-0.178217	627	(0.01, 2.5, 0.1)	1	0	precuneus	1	1	0.507077	lower
107	gene coexpression	AD-realted	Cluster3	mis	0.414141	0.153689	-0.178217	627	(0.01, 2.5, 0.1)	0	0	precuneus	1	0	0.507077	lower
108	gene coexpression	AD-realted	Cluster4	clear	0.414141	0.153689	-0.178217	627	(0.01, 2.5, 0.1)	0	0	precuneus	1	0	0.507077	lower
109	gene coexpression	AD-realted	Cluster3	syn	0.414141	0.153689	-0.178217	627	(0.01, 2.5, 0.1)	1	0	precuneus	1	1	0.507077	lower
110	gene coexpression	AD-realted	Cluster3	clear	0.414141	0.153689	-0.178217	627	(0.01, 2.5, 0.1)	0	0	precuneus	1	0	0.507077	lower
111	gene coexpression	AD-realted	Cluster5	clear	0.414141	0.153689	-0.178217	627	(0.01, 2.5, 0.1)	0	0	precuneus	1	0	0.507077	lower
112	gene coexpression	AD-realted	Cluster6	syn	0.414141	0.153689	-0.178217	627	(0.01, 2.5, 0.1)	1	0	precuneus	1	1	0.507077	lower
113	gene coexpression	AD-realted	Cluster7	syn	0.414141	0.153689	-0.178217	627	(0.01, 2.5, 0.1)	1	0	precuneus	1	1	0.507077	lower
114	gene coexpression	AD-realted	Cluster6	mis	0.414141	0.153689	-0.178217	627	(0.01, 2.5, 0.1)	0	0	precuneus	1	0	0.507077	lower
115	gene coexpression	AD-realted	Cluster7	mis	0.414141	0.153689	-0.178217	627	(0.01, 2.5, 0.1)	0	0	precuneus	1	0	0.507077	lower
116	gene coexpression	AD-realted	Cluster6	spread	0.414141	0.153689	-0.178217	627	(0.01, 2.5, 0.1)	0	0	precuneus	1	0	0.507077	lower
117	gene coexpression	AD-realted	Cluster4	syn	0.414141	0.153689	-0.178217	627	(0.01, 2.5, 0.1)	1	0	precuneus	1	1	0.507077	lower
118	gene coexpression	AD-realted	Cluster6	clear	0.414141	0.153689	-0.178217	627	(0.01, 2.5, 0.1)	0	0	precuneus	1	0	0.507077	lower
119	gene coexpression	AD-realted	Cluster5	syn	0.414141	0.153689	-0.178217	627	(0.01, 2.5, 0.1)	1	0	precuneus	1	1	0.507077	lower
120	gene coexpression	AD-realted	Cluster4	spread	0.414141	0.153689	-0.178217	627	(0.01, 2.5, 0.1)	0	0	precuneus	1	0	0.507077	lower
121	gene coexpression	AD-realted	Cluster7	spread	0.414141	0.153689	-0.178217	627	(0.01, 2.5, 0.1)	0	0	precuneus	1	0	0.507077	lower
122	gene coexpression	AD-realted	Cluster4	mis	0.414141	0.153689	-0.178217	627	(0.01, 2.5, 0.1)	0	0	precuneus	1	0	0.507077	lower
123	gene coexpression	AD-realted	Cluster5	spread	0.414141	0.153689	-0.178217	627	(0.01, 2.5, 0.1)	0	0	precuneus	1	0	0.507077	lower
124	gene coexpression	AD-realted	Cluster7	clear	0.414141	0.153689	-0.178217	627	(0.01, 2.5, 0.1)	0	0	precuneus	1	0	0.507077	lower
125	gene coexpression	AD-realted	Cluster5	mis	0.414141	0.153689	-0.178217	627	(0.01, 2.5, 0.1)	0	0	precuneus	1	0	0.507077	lower
126	gene coexpression	Receptors	M1	mis	0.412251	0.265162	-0.75723	725	(0.05, 3, 0.1)	0	0	precuneus	1	0	0.507077	lower
127	gene coexpression	Receptors	5HT2a	spread	0.410734	0.196398	0.0118276	326	(0.5, 2.9, 0.1)	0	0	entorhinal	1	0	0.478484	lower
128	gene coexpression	Receptors	CB1	mis	0.406037	0.249188	-0.983114	66	(0.5, 2.5, 1)	0	0	precuneus	1	0	0.507077	lower
129	gene coexpression	AD-realted	Cluster7	clear	0.403072	0.20724	0.0104223	362	(0.5, 2.5, 0.1)	0	0	entorhinal	0	0	0.478484	lower
130	gene coexpression	AD-realted	Cluster6	syn	0.403072	0.20724	0.0104223	362	(0.5, 2.5, 0.1)	1	0	entorhinal	0	1	0.478484	lower
131	gene coexpression	AD-realted	Cluster3	mis	0.403072	0.20724	0.0104223	362	(0.5, 2.5, 0.1)	0	0	entorhinal	0	0	0.478484	lower
132	gene coexpression	AD-realted	Cluster2	syn	0.403072	0.20724	0.0104223	362	(0.5, 2.5, 0.1)	1	0	entorhinal	0	1	0.478484	lower
133	gene coexpression	AD-realted	Cluster3	clear	0.403072	0.20724	0.0104223	362	(0.5, 2.5, 0.1)	0	0	entorhinal	0	0	0.478484	lower
134	gene coexpression	AD-realted	Cluster2	mis	0.403072	0.20724	0.0104223	362	(0.5, 2.5, 0.1)	0	0	entorhinal	0	0	0.478484	lower
135	gene coexpression	AD-realted	Cluster6	spread	0.403072	0.20724	0.0104223	362	(0.5, 2.5, 0.1)	0	0	entorhinal	0	0	0.478484	lower
136	gene coexpression	AD-realted	Cluster2	spread	0.403072	0.20724	0.0104223	362	(0.5, 2.5, 0.1)	0	0	entorhinal	0	0	0.478484	lower
137	gene coexpression	AD-realted	Cluster6	mis	0.403072	0.20724	0.0104223	362	(0.5, 2.5, 0.1)	0	0	entorhinal	0	0	0.478484	lower
138	gene coexpression	AD-realted	Cluster2	clear	0.403072	0.20724	0.0104223	362	(0.5, 2.5, 0.1)	0	0	entorhinal	0	0	0.478484	lower
139	gene coexpression	AD-realted	Cluster1	syn	0.403072	0.20724	0.0104223	362	(0.5, 2.5, 0.1)	1	0	entorhinal	0	1	0.478484	lower
140	gene coexpression	AD-realted	Cluster6	clear	0.403072	0.20724	0.0104223	362	(0.5, 2.5, 0.1)	0	0	entorhinal	0	0	0.478484	lower
141	gene coexpression	AD-realted	Cluster1	spread	0.403072	0.20724	0.0104223	362	(0.5, 2.5, 0.1)	0	0	entorhinal	0	0	0.478484	lower
142	gene coexpression	AD-realted	Cluster1	mis	0.403072	0.20724	0.0104223	362	(0.5, 2.5, 0.1)	0	0	entorhinal	0	0	0.478484	lower
143	gene coexpression	AD-realted	Cluster5	syn	0.403072	0.20724	0.0104223	362	(0.5, 2.5, 0.1)	1	0	entorhinal	0	1	0.478484	lower
144	gene coexpression	AD-realted	Cluster1	clear	0.403072	0.20724	0.0104223	362	(0.5, 2.5, 0.1)	0	0	entorhinal	0	0	0.478484	lower
145	gene coexpression	AD-realted	Cluster5	spread	0.403072	0.20724	0.0104223	362	(0.5, 2.5, 0.1)	0	0	entorhinal	0	0	0.478484	lower
146	gene coexpression	AD-realted	Cluster7	mis	0.403072	0.20724	0.0104223	362	(0.5, 2.5, 0.1)	0	0	entorhinal	0	0	0.478484	lower
147	gene coexpression				0.403072	0.20724	0.0104223	362	(0.5, 2.5, 0.1)	0	1	entorhinal	0	0	0.478484	lower
148	gene coexpression	AD-realted	Cluster3	spread	0.403072	0.20724	0.0104223	362	(0.5, 2.5, 0.1)	0	0	entorhinal	0	0	0.478484	lower
149	gene coexpression	AD-realted	Cluster4	syn	0.403072	0.20724	0.0104223	362	(0.5, 2.5, 0.1)	1	0	entorhinal	0	1	0.478484	lower
150	gene coexpression	AD-realted	Cluster4	mis	0.403072	0.20724	0.0104223	362	(0.5, 2.5, 0.1)	0	0	entorhinal	0	0	0.478484	lower
151	gene coexpression	AD-realted	Cluster4	spread	0.403072	0.20724	0.0104223	362	(0.5, 2.5, 0.1)	0	0	entorhinal	0	0	0.478484	lower
152	gene coexpression	AD-realted	Cluster7	spread	0.403072	0.20724	0.0104223	362	(0.5, 2.5, 0.1)	0	0	entorhinal	0	0	0.478484	lower
153	gene coexpression	AD-realted	Cluster7	syn	0.403072	0.20724	0.0104223	362	(0.5, 2.5, 0.1)	1	0	entorhinal	0	1	0.478484	lower
154	gene coexpression	AD-realted	Cluster3	syn	0.403072	0.20724	0.0104223	362	(0.5, 2.5, 0.1)	1	0	entorhinal	0	1	0.478484	lower
155	gene coexpression	AD-realted	Cluster5	mis	0.403072	0.20724	0.0104223	362	(0.5, 2.5, 0.1)	0	0	entorhinal	0	0	0.478484	lower
156	gene coexpression	AD-realted	Cluster5	clear	0.403072	0.20724	0.0104223	362	(0.5, 2.5, 0.1)	0	0	entorhinal	0	0	0.478484	lower
157	gene coexpression	AD-realted	Cluster4	clear	0.403072	0.20724	0.0104223	362	(0.5, 2.5, 0.1)	0	0	entorhinal	0	0	0.478484	lower
158	gene coexpression	Celltype	Micro	spread	0.40285	0.174273	-0.171502	817	(0.01, 2.5, 0.1)	1	0	precuneus	1	1	0.507077	lower
159	gene coexpression	Celltype	Micro	spread	0.399464	0.176223	-0.0917358	335	(0.5, 2.9, 0.1)	1	0	entorhinal	0	1	0.478484	lower
160	gene coexpression	Celltype	Astro	syn	0.39923	0.144976	-0.659328	447	(0.01, 2, 0.1)	1	0	precuneus	1	1	0.507077	lower
161	gene coexpression	Cortical expansion	devexp	spread	0.398444	0.364403	-0.152973	8852	(0.5, 2.9, 0.1)	1	0	entorhinal	0	0	0.478484	lower
162	gene coexpression	AD-realted	APOE	clear	0.398317	0.27515	-0.809486	28	(0.01, 2.9, 1)	1	0	precuneus	1	0	0.507077	lower
163	gene coexpression	Receptors	M1	mis	0.397411	0.278155	-0.633111	303	(0.3, 3, 0.3)	0	0	entorhinal	0	0	0.478484	lower
164	gene coexpression	Receptors	H3	spread	0.396973	0.175295	-0.27253	495	(0.1, 3, 0.1)	1	0	precuneus	1	1	0.507077	lower
165	gene coexpression	Celltype	Astro	spread	0.395963	0.180302	-0.0807724	435	(0.5, 2.5, 0.1)	1	0	entorhinal	1	0	0.478484	lower
166	gene coexpression	Receptors	5HT6	syn	0.395097	0.175601	-0.215646	125	(0.01, 3, 1)	1	0	entorhinal	1	0	0.478484	lower
167	gene coexpression	Receptors	MOR	mis	0.394601	0.246739	-0.940208	53	(0.3, 3, 1)	0	0	precuneus	1	0	0.507077	lower
168	gene coexpression	Celltype	Neuro-Ex	mis	0.390575	0.284966	-0.958976	138	(0.01, 3, 1)	0	0	entorhinal	0	0	0.478484	lower
169	gene coexpression	Receptors	5HT2a	syn	0.388494	0.187224	-0.218926	106	(0.5, 3, 1)	0	0	entorhinal	0	0	0.478484	lower
170	gene coexpression	Celltype	Neuro-In	syn	0.382386	0.159336	-0.233988	158	(0.01, 2, 1)	1	0	entorhinal	0	0	0.478484	lower
171	gene coexpression	Celltype	Astro	spread	0.381559	0.156318	-0.559116	366	(0.01, 2.5, 0.1)	0	0	precuneus	0	0	0.507077	lower
172	gene coexpression	metabolism	cmr02	syn	0.378982	0.269177	-1.19179	6710	(0.01, 0.1, 0.1)	0	0	precuneus	1	0	0.507077	lower
173	gene coexpression	Receptors	DAT	spread	0.377165	0.214791	-0.0257057	441	(0.3, 3, 0.1)	1	0	entorhinal	0	1	0.478484	lower
174	gene coexpression	metabolism	cmr02	spread	0.376215	0.205764	-0.0461211	317	(0.5, 3, 0.1)	1	0	entorhinal	1	0	0.478484	lower
175	gene coexpression	Receptors	mGluR5	syn	0.375624	0.132222	-0.731706	701	(0.5, 1, 0.1)	0	0	precuneus	1	0	0.507077	lower
176	gene coexpression	Receptors	NET	spread	0.375323	0.201271	-0.0664796	334	(0.5, 2.9, 0.1)	1	0	entorhinal	1	1	0.478484	lower
177	gene coexpression	Celltype	OPC	mis	0.371465	0.285657	-0.961256	81	(0.7, 2, 1)	0	0	precuneus	1	0	0.507077	lower
178	gene coexpression	Cortical expansion	devexp	mis	0.370452	0.2325	-0.436479	554	(0.3, 3, 0.1)	0	0	entorhinal	0	1	0.478484	lower
179	gene coexpression	Receptors	VAChT	syn	0.369856	0.169087	-0.216705	487	(0.3, 0.9, 1)	0	0	precuneus	1	0	0.507077	lower
180	gene coexpression	Celltype	Endo	clear	0.369626	0.266713	-0.304821	429	(0.01, 1.9, 1)	0	0	entorhinal	0	1	0.478484	lower
181	gene coexpression	Receptors	5HT6	syn	0.369392	0.207	-0.225679	1354	(0.05, 1.5, 0.1)	0	0	precuneus	0	0	0.507077	lower
182	gene coexpression	Receptors	M1	spread	0.367203	0.205165	-0.0713518	310	(0.5, 3, 0.1)	0	0	entorhinal	1	0	0.478484	lower
183	gene coexpression	Celltype	OPC	syn	0.367023	0.336957	-0.797707	101	(0.7, 2, 0.1)	0	0	precuneus	1	0	0.507077	lower
184	gene coexpression	AD-realted	Abeta	mis	0.366866	0.207281	-0.066501	217	(0.1, 3, 1)	0	0	entorhinal	0	0	0.478484	lower
185	gene coexpression	Receptors	5HT2a	spread	0.364213	0.251091	-0.896271	109	(0.9, 3, 1)	0	0	precuneus	0	0	0.507077	lower
186	gene coexpression	metabolism	cmrglc	spread	0.361984	0.203404	-0.0893149	320	(0.5, 3, 0.1)	1	0	entorhinal	1	0	0.478484	lower
187	gene coexpression	Microstructure	genepc1	syn	0.361975	0.264297	-1.23216	6677	(0.01, 0.1, 0.1)	1	0	precuneus	1	0	0.507077	lower
188	gene coexpression	Celltype	Oligo	spread	0.361972	0.176872	-0.196186	407	(0.5, 2.5, 0.1)	1	0	entorhinal	1	1	0.478484	lower
189	gene coexpression	Receptors	5HT1b	clear	0.359656	0.22874	-0.401602	29999	(0.1, 3, 0.1)	1	0	entorhinal	0	1	0.478484	lower
190	gene coexpression	Receptors	D2	clear	0.357728	0.506737	-1.71137	52	(0.9, 3, 0.1)	0	0	entorhinal	1	0	0.478484	lower
191	gene coexpression	Cortical expansion	scalinghcp	clear	0.357378	0.415554	-0.674696	252	(0.9, 0.1, 0.1)	0	0	precuneus	1	0	0.507077	lower
192	gene coexpression	AD-realted	APOE	syn	0.353451	0.288564	-1.24696	6706	(0.01, 0.1, 0.1)	0	0	precuneus	1	0	0.507077	lower
193	gene coexpression	Celltype	Micro	syn	0.352395	0.145901	-0.557957	447	(0.05, 2, 0.1)	0	0	precuneus	1	0	0.507077	lower
194	gene coexpression	Receptors	NET	clear	0.351977	0.293495	-0.917652	35	(0.3, 1.9, 1)	1	0	precuneus	1	0	0.507077	lower
195	gene coexpression	Receptors	5HTT	syn	0.350911	0.263622	-0.181766	29999	(0.01, 0.9, 1)	0	0	entorhinal	1	0	0.478484	lower
196	gene coexpression	metabolism	cmrglc	syn	0.350092	0.155407	-0.469332	80	(0.01, 3, 1)	0	0	entorhinal	1	0	0.478484	lower
197	gene coexpression	Receptors	5HTT	spread	0.349964	0.167297	-0.383097	879	(0.01, 2.5, 0.1)	0	0	precuneus	1	0	0.507077	lower
198	gene coexpression	Receptors	5HT6	spread	0.349554	0.216939	-0.0863339	341	(0.5, 2.9, 0.1)	0	0	entorhinal	0	1	0.478484	lower
199	gene coexpression	Receptors	A4B2	syn	0.347879	0.261771	-1.12235	61	(0.1, 3, 1)	1	0	precuneus	1	1	0.507077	lower
200	gene coexpression	Microstructure	genepc1	spread	0.347067	0.171562	-0.472419	29999	(0.9, 3, 1)	0	0	precuneus	0	1	0.507077	lower
201	gene coexpression	Receptors	H3	syn	0.346847	0.306534	-0.182153	29999	(0.1, 0.9, 1)	1	0	entorhinal	1	0	0.478484	lower
202	gene coexpression	Receptors	mGluR5	spread	0.346567	0.228456	-0.0816161	337	(0.5, 3, 0.1)	1	0	entorhinal	0	1	0.478484	lower
203	gene coexpression	Celltype	Endo	syn	0.345341	0.283744	-0.176376	29999	(0.1, 3, 1)	0	0	precuneus	0	0	0.507077	lower
204	gene coexpression	Cortical expansion	evoexp	syn	0.344327	0.373356	-0.413972	119	(0.9, 2.5, 0.1)	0	0	entorhinal	0	0	0.478484	lower
205	gene coexpression	Receptors	5HT6	mis	0.343624	0.224203	-0.491543	171	(0.01, 3, 1)	0	0	entorhinal	1	0	0.478484	lower
206	gene coexpression	Celltype	Astro	mis	0.342226	0.292524	-0.984701	46	(0.5, 3, 1)	0	0	precuneus	1	0	0.507077	lower
207	gene coexpression	Celltype	Micro	syn	0.341789	0.187248	-0.295649	154	(0.01, 2.9, 1)	0	0	entorhinal	0	0	0.478484	lower
208	gene coexpression	Receptors	D2	mis	0.341429	0.328775	-0.327686	159	(0.5, 3, 0.5)	0	0	entorhinal	0	0	0.478484	lower
209	gene coexpression	metabolism	cmr02	syn	0.339438	0.150986	-0.63398	80	(0.01, 3, 1)	0	0	entorhinal	0	0	0.478484	lower
210	gene coexpression	Cortical expansion	devexp	syn	0.337964	0.281481	-0.896708	29999	(0.9, 0.5, 0.1)	0	0	entorhinal	0	0	0.478484	lower
211	gene coexpression	Celltype	Micro	mis	0.337947	0.178885	-0.767651	670	(0.1, 2, 0.1)	0	0	precuneus	1	0	0.507077	lower
212	gene coexpression	Receptors	CB1	syn	0.336072	0.152322	-0.617521	580	(0.01, 1.5, 0.1)	0	0	precuneus	1	0	0.507077	lower
213	gene coexpression	Celltype	Neuro-In	spread	0.33538	0.225859	-0.134476	371	(0.5, 2.9, 0.1)	0	0	entorhinal	1	0	0.478484	lower
214	gene coexpression	Receptors	GABAa	spread	0.333631	0.218811	-0.128015	346	(0.5, 2.9, 0.1)	1	0	entorhinal	1	1	0.478484	lower
215	gene coexpression	Receptors	mGluR5	mis	0.332745	0.211461	-0.209044	9252	(0.01, 1.5, 0.1)	0	0	entorhinal	0	0	0.478484	lower
216	gene coexpression	Celltype	Neuro-In	spread	0.332046	0.354166	-1.0104	99	(0.9, 3, 1)	0	0	precuneus	0	0	0.507077	lower
217	gene coexpression	Receptors	H3	syn	0.331986	0.145198	-1.01427	108	(0.3, 1.5, 1)	0	0	precuneus	0	0	0.507077	lower
218	gene coexpression	Receptors	5HT1b	syn	0.330369	0.359836	-0.543198	542	(0.01, 0.9, 1)	0	0	entorhinal	1	0	0.478484	lower
219	gene coexpression	Receptors	NMDA	clear	0.328965	0.390851	-0.948569	16	(0.5, 3, 1)	0	0	precuneus	1	0	0.507077	lower
220	gene coexpression	Celltype	Neuro-Ex	spread	0.327791	0.361409	-1.01115	96	(0.9, 3, 1)	0	0	precuneus	0	0	0.507077	lower
221	gene coexpression	Celltype	Neuro-In	mis	0.327011	0.226752	-0.999204	196	(0.01, 2.5, 1)	0	0	entorhinal	0	1	0.478484	lower
222	gene coexpression	Celltype	Oligo	clear	0.32678	0.448227	-1.89028	21	(0.5, 3, 1)	1	0	precuneus	1	0	0.507077	lower
223	gene coexpression	metabolism	cbv	clear	0.325816	0.411212	-1.18095	18	(0.5, 3, 1)	1	0	precuneus	1	0	0.507077	lower
224	gene coexpression	Receptors	GABAa	clear	0.325456	0.25687	-1.04076	92	(0.01, 1.5, 0.3)	1	0	precuneus	1	0	0.507077	lower
225	gene coexpression	Receptors	NMDA	clear	0.325221	0.28181	-0.627608	64	(0.01, 3, 1)	1	0	entorhinal	0	0	0.478484	lower
226	gene coexpression	Receptors	NMDA	syn	0.324192	0.222739	-0.224305	313	(0.05, 1.5, 0.5)	0	0	entorhinal	1	0	0.478484	lower
227	gene coexpression	Receptors	DAT	mis	0.323579	0.278131	-1.13031	1075	(0.01, 1.5, 0.3)	0	0	precuneus	1	0	0.507077	lower
228	gene coexpression	Receptors	5HTT	syn	0.322912	0.281546	-0.318909	29999	(0.01, 1.5, 1)	0	0	precuneus	0	0	0.507077	lower
229	gene coexpression	Receptors	VAChT	syn	0.319933	0.254816	-0.217202	1022	(0.1, 0.9, 1)	0	0	entorhinal	0	0	0.478484	lower
230	gene coexpression	AD-realted	Abeta	syn	0.318912	0.251394	-0.130157	126	(0.01, 3, 1)	0	0	entorhinal	0	0	0.478484	lower
231	gene coexpression	metabolism	cbv	syn	0.318242	0.433304	-1.15583	2514	(0.9, 0.1, 0.1)	0	0	precuneus	1	0	0.507077	lower
232	gene coexpression	Receptors	DAT	syn	0.316683	0.162135	-0.603821	134	(0.01, 1.9, 0.7)	0	0	precuneus	1	0	0.507077	lower
233	gene coexpression	metabolism	cmrglc	syn	0.316018	0.378592	-1.13029	31	(0.01, 0.9, 1)	0	0	precuneus	0	0	0.507077	lower
234	gene coexpression	AD-realted	APOE	spread	0.315956	0.194846	-0.758474	4436	(0.9, 3, 1)	0	0	precuneus	0	1	0.507077	lower
235	gene coexpression	Receptors	mGluR5	syn	0.315796	0.270282	-0.193781	291	(0.01, 1.5, 1)	0	0	entorhinal	0	0	0.478484	lower
236	gene coexpression	Receptors	A4B2	spread	0.315623	0.345831	-1.15101	138	(0.9, 3, 0.1)	0	0	precuneus	1	0	0.507077	lower
237	gene coexpression	Receptors	A4B2	syn	0.315089	0.361122	-0.334395	521	(0.01, 0.9, 1)	1	0	entorhinal	0	1	0.478484	lower
238	gene coexpression	Receptors	D1	syn	0.314713	0.155982	-0.595538	753	(0.01, 1.5, 0.1)	0	0	precuneus	1	0	0.507077	lower
239	gene coexpression	Receptors	5HT6	clear	0.311817	0.428723	-1.06283	15	(0.3, 3, 1)	0	0	precuneus	1	0	0.507077	lower
240	gene coexpression	Celltype	Oligo	syn	0.311652	0.412965	-1.21701	24	(0.01, 0.9, 1)	0	0	precuneus	1	0	0.507077	lower
241	gene coexpression	Receptors	M1	spread	0.310596	0.377464	-1.11627	97	(0.9, 3, 1)	0	0	precuneus	0	0	0.507077	lower
242	gene coexpression	Celltype	Oligo	syn	0.310032	0.266541	-0.437752	180	(0.01, 1.5, 1)	0	0	entorhinal	0	0	0.478484	lower
243	gene coexpression	Receptors	DAT	clear	0.309562	0.438785	-1.10245	164	(0.9, 0.1, 0.1)	0	0	precuneus	1	0	0.507077	lower
244	gene coexpression	Receptors	GABAa	syn	0.309477	0.445761	-1.32439	2510	(0.9, 0.1, 0.1)	0	0	precuneus	1	0	0.507077	lower
245	gene coexpression	Receptors	5HT1b	syn	0.309416	0.439002	-1.13012	18	(0.01, 3, 1)	0	0	precuneus	0	0	0.507077	lower
246	gene coexpression	Receptors	NET	syn	0.309172	0.44341	-1.14082	17	(0.01, 3, 1)	0	0	precuneus	1	0	0.507077	lower
247	gene coexpression	metabolism	cbf	syn	0.309098	0.454332	-1.13445	14	(0.01, 3, 1)	0	0	precuneus	1	0	0.507077	lower
248	gene coexpression	AD-realted	Abeta	clear	0.308531	0.462904	-1.09896	49	(0.7, 0.1, 0.1)	0	0	precuneus	1	0	0.507077	lower
249	gene coexpression	Microstructure	thickness	mis	0.308425	0.302684	-0.461503	521	(0.3, 2.9, 0.1)	0	0	entorhinal	0	0	0.478484	lower
250	gene coexpression	Microstructure	myelinmap	syn	0.308375	0.458874	-1.10961	12	(0.01, 3, 1)	1	0	precuneus	1	0	0.507077	lower
251	gene coexpression	Celltype	OPC	clear	0.308156	0.467951	-1.31959	68	(0.9, 0.1, 0.1)	0	0	precuneus	1	0	0.507077	lower
252	gene coexpression	Cortical expansion	evoexp	clear	0.307745	0.467706	-1.09159	46	(0.9, 0.1, 0.1)	0	0	precuneus	1	0	0.507077	lower
253	gene coexpression	Receptors	CB1	spread	0.30763	0.265008	-0.117901	356	(0.5, 2.9, 0.1)	1	0	entorhinal	0	1	0.478484	lower
254	gene coexpression	Receptors	CB1	clear	0.307561	0.467779	-1.13348	52	(0.9, 0.1, 0.1)	0	0	precuneus	1	0	0.507077	lower
255	gene coexpression	Receptors	NMDA	syn	0.307526	0.455169	-1.12798	13	(0.01, 3, 1)	0	0	precuneus	0	0	0.507077	lower
256	gene coexpression	Cortical expansion	scalingpnc	clear	0.307485	0.458692	-1.11236	10	(0.01, 0.5, 1)	0	0	precuneus	1	0	0.507077	lower
257	gene coexpression	Celltype	Astro	clear	0.307474	0.461467	-1.22478	110	(0.9, 0.1, 0.1)	0	0	precuneus	1	0	0.507077	lower
258	gene coexpression	Microstructure	thickness	clear	0.307358	0.467923	-1.10623	51	(0.9, 0.1, 0.1)	0	0	precuneus	1	0	0.507077	lower
259	gene coexpression	Receptors	5HT4	clear	0.307227	0.468654	-1.0919	47	(0.9, 0.1, 0.1)	0	0	precuneus	1	0	0.507077	lower
260	gene coexpression	Receptors	D2	clear	0.307174	0.466537	-1.10511	61	(0.9, 0.1, 0.1)	0	0	precuneus	0	0	0.507077	lower
261	gene coexpression	Celltype	Endo	mis	0.30713	0.472768	-1.27745	14	(0.01, 3, 0.1)	0	0	precuneus	1	0	0.507077	lower
262	gene coexpression	Receptors	5HT2a	clear	0.306947	0.461404	-1.10757	18	(0.5, 0.1, 0.5)	0	0	precuneus	1	0	0.507077	lower
263	gene coexpression	Receptors	D1	mis	0.306887	0.464307	-1.23431	10	(0.01, 2.5, 1)	0	0	precuneus	1	0	0.507077	lower
264	gene coexpression	Cortical expansion	scaling	clear	0.306873	0.468698	-1.10794	52	(0.9, 0.1, 0.1)	0	0	precuneus	1	0	0.507077	lower
265	gene coexpression	Cortical expansion	scalingnih	clear	0.306689	0.468578	-1.09355	51	(0.9, 0.1, 0.1)	0	0	precuneus	1	0	0.507077	lower
266	gene coexpression	Microstructure	myelinmap	clear	0.306643	0.476614	-1.16804	11	(0.9, 3, 1)	0	0	precuneus	1	0	0.507077	lower
267	gene coexpression	Receptors	A4B2	mis	0.306606	0.4582	-1.11269	187	(0.9, 0.1, 0.1)	0	0	precuneus	1	0	0.507077	lower
268	gene coexpression	Receptors	A4B2	clear	0.306565	0.47639	-1.14081	7	(0.9, 0.5, 1)	0	0	precuneus	1	0	0.507077	lower
269	gene coexpression	Receptors	GABAa	mis	0.306502	0.466033	-1.11687	74	(0.9, 0.1, 0.1)	0	0	precuneus	1	0	0.507077	lower
270	gene coexpression	Receptors	H3	clear	0.306498	0.470824	-1.12776	17	(0.9, 1, 1)	0	0	precuneus	1	0	0.507077	lower
271	gene coexpression	Receptors	VAChT	mis	0.306464	0.460729	-1.10288	137	(0.9, 0.1, 0.1)	0	0	precuneus	1	0	0.507077	lower
272	gene coexpression	metabolism	cbv	mis	0.306337	0.467924	-1.09985	54	(0.9, 0.1, 0.1)	0	0	precuneus	1	0	0.507077	lower
273	gene coexpression	AD-realted	APOE	mis	0.306309	0.467184	-1.09527	60	(0.9, 0.1, 0.1)	0	0	precuneus	1	0	0.507077	lower
274	gene coexpression	Microstructure	genepc1	mis	0.306299	0.467849	-1.09512	54	(0.9, 0.1, 0.1)	0	0	precuneus	1	0	0.507077	lower
275	gene coexpression	Receptors	M1	clear	0.306154	0.457389	-1.11363	10	(0.01, 3, 1)	0	0	precuneus	1	0	0.507077	lower
276	gene coexpression	Receptors	5HT6	mis	0.306104	0.471998	-1.09336	11	(0.01, 1.5, 0.1)	0	0	precuneus	0	0	0.507077	lower
277	gene coexpression	Microstructure	genepc1	clear	0.306074	0.46792	-1.10602	12	(0.7, 3, 1)	0	0	precuneus	1	0	0.507077	lower
278	gene coexpression	Receptors	5HTT	mis	0.305965	0.477325	-1.12581	4	(0.01, 3, 1)	0	0	precuneus	1	0	0.507077	lower
279	gene coexpression	Celltype	Oligo	spread	0.305965	0.477316	-1.08652	17	(0.9, 3, 0.1)	0	0	precuneus	0	1	0.507077	lower
280	gene coexpression	Celltype	Endo	spread	0.305963	0.477316	-1.0863	17	(0.9, 3, 0.1)	0	0	precuneus	1	0	0.507077	lower
281	gene coexpression	metabolism	cbf	spread	0.305918	0.478112	-1.08603	13	(0.9, 3, 0.1)	0	0	precuneus	1	0	0.507077	lower
282	gene coexpression	Cortical expansion	devexp	clear	0.305909	0.482354	-1.09042	4	(0.01, 3, 1)	0	0	precuneus	1	0	0.507077	lower
283	gene coexpression	metabolism	cmrglc	mis	0.305813	0.478355	-1.10223	10	(0.9, 3, 0.1)	0	0	precuneus	1	0	0.507077	lower
284	gene coexpression	metabolism	cmrglc	spread	0.30576	0.479713	-1.08574	8	(0.9, 3, 1)	0	0	precuneus	0	0	0.507077	lower
285	gene coexpression	metabolism	cmr02	mis	0.305754	0.47878	-1.10588	9	(0.9, 3, 0.1)	0	0	precuneus	1	0	0.507077	lower
286	gene coexpression	Receptors	5HT1b	spread	0.305741	0.480505	-1.08524	7	(0.9, 3, 1)	0	0	precuneus	1	0	0.507077	lower
287	gene coexpression	Receptors	GABAa	spread	0.305725	0.480562	-1.08549	7	(0.9, 3, 1)	0	0	precuneus	0	1	0.507077	lower
288	gene coexpression	Receptors	H3	mis	0.305718	0.478196	-1.11403	7	(0.9, 3, 1)	0	0	precuneus	1	0	0.507077	lower
289	gene coexpression	Receptors	NET	spread	0.305716	0.480555	-1.08526	7	(0.9, 3, 1)	0	0	precuneus	0	1	0.507077	lower
290	gene coexpression	metabolism	cmr02	spread	0.305685	0.481413	-1.08471	6	(0.9, 3, 1)	0	0	precuneus	0	0	0.507077	lower
291	gene coexpression	AD-realted	MAPT	clear	0.305679	0.484304	-1.10298	3	(0.01, 3, 1)	0	0	precuneus	1	0	0.507077	lower
292	gene coexpression	Receptors	5HT1b	mis	0.305656	0.479049	-1.11254	6	(0.9, 3, 1)	0	0	precuneus	1	0	0.507077	lower
293	gene coexpression	Microstructure	myelinmap	spread	0.305656	0.481418	-1.08474	6	(0.9, 3, 1)	0	0	precuneus	0	1	0.507077	lower
294	gene coexpression	metabolism	cbv	spread	0.305653	0.481484	-1.08478	6	(0.9, 3, 1)	0	0	precuneus	0	1	0.507077	lower
[truncated: 2,070 more rows]

## Sheet: Subtype3
	Connectivity	Factor type	Factor	Rate	R	MSE	EV	Time	Hyperparam	Best rate	Baseline model	epicenter	Selected_epicenter	Final_selected	Null model (95%CI)	> Null 95%CI
[truncated: 3,152 more rows]

[truncated: 1 more sheets: Subtype4]
